# Supplementary material for: A non-canonical Arp2/3 complex is essential for Plasmodium DNA segregation and transmission of malaria.
Source: Research Square preprint supplement (doi:10.21203/rs.3.rs-4479771/v1), 2024-05-30
Supplement: Supplementary file 1 [file a42e6740a96e0b834e6405a7.xlsx]

## Sheet: Supplementary Table 1 ARPC1-GFP
																					ARPC1-GFP nonact vs GFPcon		ARPC1-GFP act vs GFPcon
Gene ID	Accession	Description	MW [kDa]	Abundance - Top N Average: GFPcon nonact I	Abundance - Top N Average: GFPcon nonact II	Abundance - Top N Average: GFPcon nonact III	Abundance - Top N Average: GFPcon nonact IV	Abundance - Top N Average: GFPcon act I	Abundance - Top N Average: GFPcon act II	Abundance - Top N Average: GFPcon act III	Abundance - Top N Average: GFPcon act IV	Abundance - Top N Average: ARPC1-GFP nonact I	Abundance - Top N Average: ARPC1-GFP nonact II	Abundance - Top N Average: ARPC1-GFP nonact III	Abundance - Top N Average: ARPC1-GFP nonact IV	Abundance - Top N Average: ARPC1-GFP act I	Abundance - Top N Average: ARPC1-GFP act II	Abundance - Top N Average: ARPC1-GFP act III	Abundance - Top N Average: ARPC1-GFP act IV	#ARPC1-GFP act samples detected	p_value	log2FC	p_value	log2FC	# Peptides	# PSMs	# Unique Peptides	Coverage [%]	Sequence
PBANKA_0929300	A0A509AII0	Actin-related protein 2/3 complex subunit 1, putative OS=Plasmodium berghei (strain Anka) OX=5823 GN=PBANKA_0929300 PE=3 SV=1	44.9	0	0	0	0	0	37552	0	685011	0	627727	420081	3475342	713158	887504	1873443	3670803	4	0.0191115	2.03409	2.81648e-06	3.90539	12	123	12	26	MIEYLKCNCVKYSIPDEEYNIPIKLSPNKKEMLIAVVNTKNNIVLYKIINTEIIYFDILYTGSRNKIIGLEWSAKNELLIVTIDMKCVIFKKNQKGKWECTNVNISTEELPTCVCWHPHANTFAIGFSSGAIFICSLKEKKKWVIKKVENHTGSILFLDWSSSGYILSTSSLDSTSLLIYTPNIVDEETNNKDNLKLHRKFEECIAERNFKNNDIINKIECTGYILCHSSFSLSNEKVAIIASSFDNSCKKQKIIISDFLKSPINIQSVTWVGQTLQKCLFLDNERLLVYGYEVFPIIIECINNEWIISRVVLPEFIIKNLSVDFFYDKKSIKDIEQTCNELNGNEIIGEIVAHSNSILQLSMLETCEDMKNGKFVTVSSDFNVVIWNYNL
PBANKA_0612300	A0A509AF39	Uncharacterized protein OS=Plasmodium berghei (strain Anka) OX=5823 GN=PBANKA_0612300 PE=4 SV=1	99	0	0	0	0	0	0	0	0	0	78062	44214	1477576	90432	529383	1019083	2167806	4	0.0210977	1.27081	2.32003e-07	3.34522	51	276	51	55	MDNKDEITSIGNKNKDEEIFKLRKLVSIFKNECKKLKEENDNLKKNERSESLEKKNESNVENSDGNVSEYGTDIQEKNEIIKRSIIEKSYKKLKDFTILLEDRLKNVKLESEKKCVELENKIEECNKNKKIYITEIGNLKEKLREQNSVIDGLNKKIEEYKIYLRSEKNVQACYENNIDQTIEYKIEIRKLKENIETLKKNNEITSKERQQYRSMIILCSQYKEKCKQIPNFQNKIDLLENQIKEMEIYKYKDNENIKKLTELKNTIINNQIENNNLKTQLNEWVNFAKIYINSKSINIDTLKKTMNELNNKYNEANSTKTDLEFKYRKIVVDIEVQKQLLEDKNFELKILKNKNMRLEKKYEFLKKDYLLEFTKNSTHISTTSILQNKNDEKGNEDNY…
PBANKA_1229300	A0A509AQK9	Uncharacterized protein OS=Plasmodium berghei (strain Anka) OX=5823 GN=PBANKA_1229300 PE=4 SV=1	68.8	0	0	0	0	0	0	0	56640	0	42245	33332	598293	56135	208660	768503	1090773	4	0.0202041	0.903435	1.14465e-06	2.7508	15	102	15	28	MKRYSEGNEKIFNCVKNKKSKKNNSSFDLLYDCKEGYSFCKKNNFNNLNGLLIEKNIFLFNFILSIKYNKEKKKTKNSEKDNEQHEDNKLNLYYFFQDKKIFINHDNLENIKTEQTSIITENFQEKTKENSDFDDKKMDIFYEKKFKFLLKHNYFFYMKRYIHNILTNVDICTHDKPNETFFEFFSIFKNKKKKICFENSNELLSDVYFDVSEVTNDSDYNYFYEKANQIIEFEDEHMEINNEEELFKTKIEKSNSLPNNLEFNKNDNFIKFEKKKFVISGDNEKKNKEKKFEKYICRCCLKQKKDMHNFYNNNGDRENILCTKFSNVCLLQIFMSNLTKNELSFWGKIKDYIENMLGNIKSNIFYKGMSNYVEMPYVEIIDKIKNRNSFQKNFKFIKK…
PBANKA_1007500	A0A509AML7	Actin-like protein, putative OS=Plasmodium berghei (strain Anka) OX=5823 GN=PBANKA_1007500 PE=3 SV=1	48.1	0	0	0	0	0	0	0	89279	0	54701	44484	639837	79189	172359	494720	852961	4	0.0073925	1.08104	1.9718e-08	2.71414	15	99	15	52	MQNQEDRKNVPVIIMDPGTWKIKIGFATDDLPTFEMPCIYIEKEMTNSKIVKFGYDAIEDYTLIKYGHNKYKEAEKCESTKDEQLVNVSTVFADPRHPLSKNQYPHLLEVYNHLIMKLNINTCDYNLLVIIPEMVEKLYATNLLNWAFKIHDFCSISFIYNSLAASYYYGLKTALIVDLGESASRIVPVAENNGTFLEFAKISEINGYLISNYISNFVKINDNYIDYILIQDYKESNSYVSLDIDNNIKILTECNGIIKPYKIPYNNNIYIDPKGEILSHEIYFKPEFLAHLPGNFYKQNIISLSQLIFEAVSSCPIDLRKVLLNNIILVGGVSNCINMPDRLHKELNKILRIKNFSENTIISIKHIRMADIASYLGGKKYAKIIYSNKKKWITKNEYS…
PBANKA_0811800	A0A509AIH3	Actin-like protein, putative OS=Plasmodium berghei (strain Anka) OX=5823 GN=PBANKA_0811800 PE=3 SV=1	67.7	0	0	0	0	0	0	0	61612	0	0	0	248468	35502	108867	404826	651816	4	0.420886	0.216018	1.61414e-05	2.19823	23	102	23	46	MSMNKKDEIPTLYSPIEKNLYGKLNNPIEPYIYLEHSLPSSEKKKKLNRRISFSSFSNTTCSDILKLNNYLDIKNNILLLSLNNYSFKVGLVNKYDYTLQSLRLPQMEIIETWRELGYMYPPYKNYDILEECIYHCFSNIYKMDLKDQDLFIPLSSKNNMKDFSAIGDILFNSFQVKNIAFKEPSFVSSLIILEELKKKKSGIQIYREETNKECEFIYYNDNSNNHDVYDENQYDQIFNKDDIDNEEEASHIENSSCNLDSAENQNSKKLKQMSNEQNKKISQKDDIKNNGKEKNSNESLIKLRELDIFNFTALLVNIGSTKTTCTPVINGIPLPDLTSIYYIGGYDIDNQIYDEMKKNEMHQKEISMNIAKIAKEKRVFTPQNKDESEYLSILYNKNP…
PBANKA_1014200	A0A509AMR4	Arp2/3 complex 34 kDa subunit OS=Plasmodium berghei (strain Anka) OX=5823 GN=PBANKA_1014200 PE=4 SV=1	48.1	0	0	0	0	0	0	0	54310	0	29715	0	653955	0	100777	459015	677880	3	0.102858	0.685022	0.00104322	1.98533	12	65	12	30	MCEVLYKKIKETECESNLHVSNNKVLFDWIYKVIKYGIPVPSSYYSNEKIVDKETNRYVLTEYIYDADNIIYKVEAHTKIKLEKIVNMRVKCLDEEYLINNEVEKLYLDDKYNELDSIQIYISYNNFSNVWNDDTMQYFVKCYNDNNFKTHIHILEKEEFGYDIQIELYEIPKDPIKSFLISNHLSRIREALLSGPFMHFFLTKINLSENILQKFIIRKNEVIYIAKIDSCVFIIISIHYKDIYDKYVVLGLCKNIHFVTKTMDLSGNLDCTFYSNFPSHLISSDLFIYNKNEDKNNYDTVIIECDKKKENTDENVEENTEKNLGEYISTYKQLQTHSATCEENDTSKFPNVGFISIKVDAKLFNNCKEFSELIKIASRISHIIVSFREFLNNSLVLYR…
PBANKA_1415600	A0A509AQA8	DNA replication licensing factor MCM4 OS=Plasmodium berghei (strain Anka) OX=5823 GN=PBANKA_1415600 PE=3 SV=1	107.4	0	0	0	0	0	0	0	27203	0	0	0	207908	0	0	61215	211814	2	0.355062	0.278407	0.00948067	0.850205	11	26	11	14	MGTPRRRPAQNTNSYIQNSPSIFGTNNEIFGSNFMHTPVSSRRTKNSKSFLNSMLNESKYLNQSNTGSQFLRYGHTPLAIRRIKCARADIGDVGREAFMEDVESGRLPHFIDSNLEQIKELFNQFFDEFNITNYSDVLQFTDEDRSITEYILLNRDNLKVYLAYYGWKMIKFIETGRQNECKLNNCNDDENDTDGVKGLDHIKSFEVDLTHIYFFNKKLYKLIIEYPSDCISEIDKIISAKYNSLMALVLEGETQSGSPGMQHGNNINDFNGNINKQDYCRVRFFNKRHKDTPRKLGPNQIETLVCIKGVIIRCSNIIPEMTMAAFKCTSKKRIGVNNYEKCNEEVYEHVIQGEVQEPLTCNNCNNKNTFELWHNNCCFSSKQLIKLSEVTEHLKQGET…
PBANKA_1030100	Q4YU79	Actin-2 OS=Plasmodium berghei (strain Anka) OX=5823 GN=ACT2 PE=1 SV=1	42.6	0	0	0	30303	7809	55605	33692	135937	0	47626	24876	487716	0	28262	58015	339219	3	0.0796977	0.556126	0.00205585	0.793151	9	46	8	32	MPEESIALVVDNGSGMVKSGLAGDDAPKCVFPSIIGIPKMPNIMVGMEQKECYVGDEAQNKRGILTLKYPIEHGIVTNWDDMEKIWRHTFFNELRVSPEEHPVLLTEAPLNPKTNREKMTQIMFESFDVPAMYVSIQAILSLYASGRTTGIVLDSGDGVTHTVPIYEGYVLPHAINRTDMAGRDLTYYMMKLFTERGYTFTTTAEREIVRDIKEKLCYIALDYDEELKKSEERTEEVEEMYELPDGNLITVGSERFRCPEALFNPSLIGRECPGLHITAYQSIMKCDIDIRKELYNNIVLSGGTTMYNYIGERLTNEMTSLAPPSMKIKVIAPPERKYSVWIGGSILSSLSTFQKMWITKEEYDESGPSIVHRKCF
PBANKA_0941500	A0A509AQH1	40S ribosomal protein S4 OS=Plasmodium berghei (strain Anka) OX=5823 GN=PBANKA_0941500 PE=3 SV=1	29.8	0	28978	21678	0	0	593960	154935	183199	152803	0	24091	0	134216	0	59982	282083	3	0.693691	-0.172552	0.124401	0.781437	6	30	6	30	MGKGIKKHMKRVNAPSHWMLNKMDGQYAPKTSSGPHKLLESIPLVILLRNRLKYALTFDEVKMILIQKIVKVDNKTRTDCTFPVGLMDVIHITKSNEFFRLLYDVKGRFVPHRITNEESKYKLCKVKKIILRKGKLSIAITHDGRSIPYIHPEVKVNDTIRLDLETGKVLEHLKFQVGNMVMVTAGHSVGRVGTILSIDKNIGTYDIIHVKDSRGKIFATRLSNIFVIGDALKPYISLPREKGIKLDIIEERRNRLKAQNN
PBANKA_1407600	A0A509AQ32	60S ribosomal protein L24, putative OS=Plasmodium berghei (strain Anka) OX=5823 GN=PBANKA_1407600 PE=3 SV=1	18.9	0	0	0	33430	0	141625	121543	99562	49350	0	17906	185809	150219	0	44726	182714	3	0.767223	0.0537682	0.121947	0.771341	3	30	3	18	MASIKTTVKTEACSFSEYRIYPGRGQKYIAKDGKVYFYLSSKFASLALQKKKAAKLRWTQTWRRNNKKTKVEATQRRRYKKTIKVQKAVCGLSVEDIRNRKAYVQSIEAKNKARFAGKEKEDKKKGKDDKKKSVAPAQQKKEFTKGNKLMNLAKSKMHKMMKK
PBANKA_1024900	A0A509AJY2	DNA replication licensing factor MCM2 OS=Plasmodium berghei (strain Anka) OX=5823 GN=PBANKA_1024900 PE=3 SV=1	111.3	0	0	0	17987	0	23716	0	98209	0	0	0	249437	0	0	142683	305915	2	0.837294	0.0610288	0.0364244	0.767696	15	54	15	19	MDDKKKVDDELESSKYDIDEEDLLDDEGRLNEEERQAELEGSDLFEEDDGFVFGEEDEKKEIQKLRNLGLDNDEYDEDFIDDEVDYEDNLKARRAAERNIQLQRKQEGRYQKNKFWKALENHLGDDEEEDIFDKVAEKVAKRRENLHLSSDETDIPDLSNLESAKICLSVNPKDVIFDERYQQAADTCFRYFLHRFSLKDSMGVNIEQSPHLEYNETENMNDFNQYYIGKIEKMILNDKHTLIVSAKHLIQFHCENLVQWIEFKPEQILEVLHECLMVEAYRISPKLYKGRICKVVLKDWPYSTQLRNLRCTELNTLIKVTGVCVKRGYVLPKLRVMYLKCNSCDTTLSEVPIYFSDGKKPVLPRRCPHCQSSTFSVDRIKTAYTDYQKITLQESPNSV…
PBANKA_0936500	A0A509AK58	Replication factor C subunit 5, putative OS=Plasmodium berghei (strain Anka) OX=5823 GN=PBANKA_0936500 PE=4 SV=1	40.5	0	0	0	0	0	0	0	0	0	0	0	23514	0	0	61829	214371	2	0.320135	-0.307912	0.00277746	0.766709	2	7	2	10	MWLEKYAPRNLDELNIHKDITARLKKLSVHNDLPHIIFYGAPGGGKSTRIDCLIKEIFKDEKIIRRPENITNTESKININVIQSNYHLELQCFELGTKDKIIVQNIIKELCSYKSSASFFSKRPMYRIFVFKDAEFLSEGAQAGLRRTLETYIRNARVILHLEHLSKIIEPLKSRCICIRVPLPTEEEIFTVLKNICDNENVSSNYNSTNFFKTLINIHGRNLRKCIMALEMTVYSNSDKPHHSISVAHTYINELCNFVFINPTQIKIKECVTKIQSLITCQIPVNFIFETTIKYLLNSKYDNKLKYYFLRLSSHFSYLSECSYDKSISLIAFIINANTAILKYSSSKK
PBANKA_0416600	A0A509ADK8	Replication protein A1, small OS=Plasmodium berghei (strain Anka) OX=5823 GN=PBANKA_0416600 PE=4 SV=1	56.5	0	43804	0	231700	0	80327	177984	516685	35894	72764	224998	983848	0	31800	344995	727512	3	0.0857561	0.823502	0.200649	0.696436	12	97	12	28	MSENDLLFRISQITTYVSKWIIKAKVVNKSKLSTFKNNNSFFSIDITDVHGDSISCKFWGSSADKWFNNIELKKVYIFSKGRVSIANPKYNTVKHKYELTFNEDSEIHEVKDDGEIKIQKNISLVNLRDIKIATKETPFTADLIGIVKHICPPNNLKTKQGNDIIKQNIIIVDDTKHSFEISFWDSNVNLIEKDLKENEIYIFTNISIRNWNDMKNGTFGVTSSIEKVENLNDELKEKCLGISEWYNNNGKYEQFTNMKNILSNDVIQTPDKHYALSDVNDVLAKISGTYTLVGRIKRIYWKSKENEHRFYYPACTKCKKKLLSSGQDSAQGVDYDNSNFNNEENCVYSCMNCDENNVKPFYNYTFNFLFMDFSGSITLRAFSDEGFNLLGKKAEELKG…
PBANKA_1131600	A0A509AKY6	DNA replication licensing factor MCM6 OS=Plasmodium berghei (strain Anka) OX=5823 GN=PBANKA_1131600 PE=3 SV=1	107	0	0	0	0	0	0	0	30273	0	0	0	160490	0	0	39868	167029	2	0.568089	0.134693	0.00563544	0.68949	8	31	8	11	MSSIFNENELSGIDAHSVFGNNNNNEKESYENKRKKFNDNSNMSVNQRGEDEEDEEDDEEDEEPSHVQDENMAKVFEKFLKTFSEKKNGKTDADSDEDSDSVWRDNLNFDFPTELEIVNNAHYVQVLFTILQNSFSRNKVLVVDMKHVLMWEPTDRNRFDIGSQLYMYIKRHFLRILDIFEQKVQILAESINPIKTKEVGKICLRFYNKKNPIHSLRSLRCEMLGEMISVRGQVTRTSDVRPELTLASFKCNECGNIINGVKQQFRYTQPNKCPSASCSNMHDWSLVLEQSYFVDWQKIRLQEIAQESPPGSMPRNMDVILRNDIVDSVHAGDRIIVTGCLIVVPDIPTLMKPGDIPRSVARQMLKKNENSLVSQGLTGIKGVGVQDLNHKLCIYACQI…
PBANKA_1463000	A0A509B231	Osmiophilic body protein G377 OS=Plasmodium berghei (strain Anka) OX=5823 GN=PBANKA_1463000 PE=4 SV=1	309	0	0	0	0	0	36179	0	163118	0	0	0	179803	0	0	82314	306086	2	0.639794	0.108882	0.0556111	0.670624	27	96	27	13	MKILLYTFLFCICSGFAKCQKAYNFDNIIKYLKEIKVIPSYIPDKLEENIQLIPPYLVYKYKNRIYYIHNNVDIYPVINKKPKPVFPIDPDDTYECTHNNIKNTVDDEVEEDDDTVDINSFVPDNETGMFVPNINDIKEQAGTSDEFEIPKNNQVLIDQNGSNAIVNIFETEGCTNYLIGELVEFRKNKEICENIKTEFEIFNKDNIYEYNEQDEKTPTHNIEISDFYTFLNAIHILFHEDEYNKYYTINNVSVKDIKLFIKEAYINIHNSLKTYILFSGLNFSDYTYSPKEFSIDALLNDFFHLTNDSNDNMNGSFENIERIIKYVATSKSRLTIKLVENAIINFLDEQNLMVLDIKLISHIFSTNRILNYNENDIIKYAADLVNISEIDISPRIIST…
PBANKA_0309100	A0A509AH58	Eukaryotic peptide chain release factor subunit 1 OS=Plasmodium berghei (strain Anka) OX=5823 GN=PBANKA_0309100 PE=3 SV=1	48.3	0	0	0	0	0	24441	27720	177680	0	0	0	194867	0	0	119087	183636	2	0.821258	0.0686542	0.0835593	0.665546	5	24	5	13	MEVDRDANVEQWKIKRLIKKLENAKGNGTSMISLIIRSKDEVSRINKMLADELGTASNIKSRVNRLSVLSAITSTQQKLKLYNKTPPKGLVVYCGTVVTEDGKEKKMSIDFEPFRPINTSLYLCDNKFHVEALKELLESDDKFGFIIVDGNGALFGTIQGNAREVIRRFTVDLPKKHGRGGQSALRFARLRLEKRHNYLRKVAEVSTSVFITNDKVNVLGIVLAGSADFKNDLLHSDLFDQRLYAKVIKIVDISYGGDNGFNQAIELSGEALQNVKFIQEKKLIGKFFEEIAQDTGKVVYGIEDTLKALEIGAVELLIVYEGLDIIRLTTKNNVTNQTKTMHIFPHDEKQESLYKENNVELEVVEKILLTDWIINNYKKYGASLDFVTNKSQEGAQFQK…
PBANKA_0918100	A0A509AJP7	60S ribosomal protein L38, putative OS=Plasmodium berghei (strain Anka) OX=5823 GN=PBANKA_0918100 PE=3 SV=1	9.7	0	0	0	0	0	50300	33059	28560	0	0	0	48317	242812	0	0	78530	2	0.132045	-0.485688	0.415216	0.60845	3	11	3	27	MPKQIHDIRKFLKISKKPDTTAVIIVKKKNKTKKNKIITKLKLRTKKCLYTMVFNDRTKAERIESSLLPSLKRIYYPQKKK
PBANKA_1423500	A0A509AZY7	60S ribosomal protein L13-2, putative OS=Plasmodium berghei (strain Anka) OX=5823 GN=PBANKA_1423500 PE=3 SV=1	25.4	0	45439	20828	59105	0	226384	79909	88832	150584	0	0	300020	111578	0	39454	185823	3	0.65666	0.143201	0.161266	0.607761	8	48	8	33	MVSHNNVLPNVHLHKWWQRYVRVDFNKNIKRKKRRLLREKKRKQNGSTPIEKLHPLVHCPTQRYNFKIRLGKGFSLDEIKAVNLTPSAARSIGIVVDKRRKNRCEESLKRNAERLQKYLNSLVMIPLKKDKPKNGIGGIPADATKEVIEQHKETKQLRSIFKKGSNVKPFYESIDVSKIDQSYLAYKTLRKAKSEERRKNRQQQRKDIKRKSKDN
PBANKA_0610200	A0A509AH12	DNA helicase OS=Plasmodium berghei (strain Anka) OX=5823 GN=PBANKA_0610200 PE=3 SV=1	85.5	0	0	0	0	0	0	0	38334	0	0	0	164026	0	0	44370	275247	2	0.72774	0.0899785	0.0717252	0.576895	10	34	10	17	MLGIQEGRAFFNAARNPNNRPENNIRIEDNLPSLNEVYNYFQDFLSRYSSNTLKEGNLKRTLFENVKNNNFTLDLKLDDIYKQQTVFENNEISATPISERKIKKPDNYSAILARALSERPLTYLPTVERVCYEVCETANILSDEDEHLNYIQINLLNTFIRPTPIRGLLAATQERFVVVPGIIVQASKPQHKMRKITLQCRYCDHKMSIDVPLWKDKPQLPPYCRYSSTMKSSMGVANPMDNQLGCNGVLEPYVILPNECTFVDIQSLKMQELPEAVPTGDMPRHLQLNATRYLCEKMIPGDRVYVHGVLTSYNPNPKPTRVDGTNFSYLHVLGFQKYDDMSGNDLNFDVEERNELTLLAAEHDIHDKIFKSVAPELYGMDEVKKACACLLFGGTRKRI…
PBANKA_0506700	A0A509AEP6	Citrate synthase OS=Plasmodium berghei (strain Anka) OX=5823 GN=PBANKA_0506700 PE=3 SV=1	65.2	0	0	0	0	0	0	0	268731	0	0	43717	470586	0	0	36041	173030	2	0.330571	0.4117	0.0997301	0.567172	8	41	8	17	MKKIRNISRNAAFTKNKRDFDIFKSQYKKVFFHSAQKKKICEKQLNICNDKFVNENKTYIPSVYSCMFPIKKENILNKNHARYFSTNNINEPNLYIENYSKIKQHINTIDGEESIIMNILKEKTHDCIKKTREQLKTIIYTYPNTPISICTPNNVIGGLRNTIALITDTSILEKKKGILFRGRSVDRILKDFPKWDETCKYPMAEAMLWYLLTKEIPGVENLKLFSRELYCRANKIPQFVFEFIDSIPPFTHPMSQLISTVSFLESLSLFKIKYSEGILKKDYWKYILEDAVSLIAQIQVVGAYIFKRTFIDNSIKKGEGINLDIDLDWSANFSKLIGYDNNQVKDLLRLYFLLHSDHEGGNASAHVSHLIGSTLGNPYLSFSGCAIALYGPLHGLANQ…
PBANKA_1241800	A0A509ANU0	DNA replication licensing factor MCM3 OS=Plasmodium berghei (strain Anka) OX=5823 GN=PBANKA_1241800 PE=3 SV=1	107.2	0	0	0	0	0	0	0	36266	0	0	0	220987	0	0	76140	252883	2	0.772282	0.0707803	0.0793945	0.563415	13	37	13	17	MENLSIQKSVSPSRRSDFRAYNNSLINYTLMDSSINNSSILDNSMRLDKENKEKKLQKINNNIISEYESGRQSVVFTQQKYKQLLDGFLLFVQTNKYIHQKITELRADATEEYNKMMDKNIPNIIIHQRLICNINNFQTGNEQFELLAKCLIKEPYLALPAYQAAIKELWKSQDSKIDIECPKIGISGWLGRHHVTPRGLQSSMINKLVAVEGVVNKCSTVQPKLVQSVYIGEAVHDINADVRSEEKTVHLRPHYDITDFDKTAKDSGRPPASDPEGKIMHRHEIGLCKYKNHQKFVIQETPEDAPTGQMPRWVEVIVEDDLCDIVKCGDRVRVWGVYRASCGQANSTNSGLGRSFLIANNVLVKNKETYDTNLFISEADKKNFHAFAKKQNTIDILGY…
PBANKA_1423600	A0A509AQI6	40S ribosomal protein S16, putative OS=Plasmodium berghei (strain Anka) OX=5823 GN=PBANKA_1423600 PE=3 SV=1	16.4	0	0	0	90161	33436	495072	159926	251465	155092	52665	80038	358562	56350	30278	47041	317451	4	0.116276	0.554247	0.177927	0.532745	5	48	5	38	MTTKVKRVLTFGKKKTSVAVATVTNGKGLIKLNGKNIDLVEPYILRTKVYEPLWLIGSAKLKNLDIRVRVKGGGQTSQIYAIRQAISKGIISYYQKYVDESTKKELKDTLLRYDRTLLVGDTRRCEPKKFGGKGARARYQKSYR
PBANKA_1231800	A0A509AQS2	60S ribosomal protein L12, putative OS=Plasmodium berghei (strain Anka) OX=5823 GN=PBANKA_1231800 PE=3 SV=1	18.2	0	0	0	49153	0	542923	80414	352788	85235	0	0	466013	0	0	193231	510174	2	0.996036	0.00210849	0.255652	0.53004	6	57	6	42	MAKRPDPNEIRYVYIRQVGGEVGASSVLSPKLGPLGLSPKKIGDDIAKETQSWKGLKICVKLTIQNRQAKIEVVPTSASMVLKELNEAPRDRKKVKNIKHNGNLKIEQVYSIARAMKEKSRAKEFRGTVKEILGTCNSIGCTVDGKKPTTIQEMIDNGDIDVPDN
PBANKA_1019500	A0A509ANB0	60S ribosomal protein L5, putative OS=Plasmodium berghei (strain Anka) OX=5823 GN=PBANKA_1019500 PE=3 SV=1	33.9	26658	39339	0	90133	0	522509	328980	445607	155923	27901	72607	500378	133304	0	114191	377576	3	0.395914	0.333407	0.34079	0.524792	10	95	10	36	MAYVKVVKNKAYFKRYQVKYRRRREGKTDYRARKALILQDKNKYNAQKLRFIVRKTNNQIICQIASSHIEGDKILSEAKSKELIRYGIPVGLKNYAAAYATGLLCARRFLKSLNLDNQFIGVEKVTSESVAEDGDKEEEGDRKPIKAFLDVGITRTTTGNRVFAALKGACDGGLNIPHGNNRFPGSKNEFNPEQLRKNILGIHVAEYMASMKEEDMDKYKAHFNDYLKHKIDENNIEKMYLTAHEKIRKNPEKKAKKAGKKFIAKHQKPTKLNAKLRKQRVKEKLEKYIEKLQ
PBANKA_1113400	A0A509ANV7	Secreted ookinete protein OS=Plasmodium berghei (strain Anka) OX=5823 GN=PBANKA_1113400 PE=4 SV=1	85.1	0	0	0	0	0	15915	0	161284	0	0	0	194482	0	0	16874	214148	2	0.61429	0.176761	0.189066	0.5072	6	23	6	12	MFRLSIFGTLFLWSIFLIIKTNCFYFKVDSELISKDSNIRKCHKEHYLNFQGQIVQVCNDKIITNTSMSNNIYISVYNKENKWEDKLKLFNNHTQKKIEYFYSFISNDSLVIIYCFSKSLISSPYECHSATSTDLITFTTQKIGIDFKSIDPLSLQDYSINELDIFEKKYILICGLDIQKKQYGEYNKFILCNASSNGGINWTEKFTFFVTGVDPKLKYTKLVPKINGNEIGFLYYSEKEHLNRYLKCKYRDGYDYECYLVGLARLESYMWDISKIRGYYISIISNNKQPPHYIYYMHTNIYTIPLEAPTSMDVDYKKGNLFPLDSYRLIYNYVAGNNTYTYILKHTGAVKYCALLYIKREHMNPGFVKNGNKYICTILYDDLIVDGDDRYFTLGVYNG…
PBANKA_0818900	A0A509AJG0	Endoplasmic reticulum chaperone BIP OS=Plasmodium berghei (strain Anka) OX=5823 GN=BIP PE=1 SV=1	72.1	0	143352	25888	162218	19994	166671	196982	550903	123410	28507	150478	550888	34828	30128	147669	402054	4	0.201193	0.339344	0.0752749	0.460626	20	186	18	32	MGNSKAFVLVLFVSLLKFISAVDPAIEGPIIGIDLGTTYSCVGVFKNGRVEILNNDLGNRITPSYVSFVDGERKVGEAAKLEATLHPTQTVFDVKRLIGRKFDDKEVAKDRTLLPYEIVNNEGKPNIRVQIKDKPTTFAPEQISAMVLEKMKEIAQSFLGKPVKNAVVTVPAYFNDAQRQATKDAGAIAGLNIVRIINEPTAAALAYGLDKKEETSILVYDLGGGTFDVSILVIDNGVFEVYATAGNTHLGGEDFDQRVMDYFIKMFKKKNNIDLRSDKRAIQKLRKEVEIAKRNLSVVHSTQIEIEDIIEGHNFSETLTRAKFEELNDDLFRETLEPVKKVLDDAKYEKSKIDEIVLVGGSTRIPKIQQIIKDFFNGKEPNRGINPDEAVAYGAAIQA…
PBANKA_0916100	A0A509AJN1	Nucleic acid binding protein, putative OS=Plasmodium berghei (strain Anka) OX=5823 GN=PBANKA_0916100 PE=4 SV=1	31.8	0	0	0	44069	0	62026	18002	146863	0	31039	74706	348852	0	0	74022	161194	2	0.0156456	0.757483	0.0810511	0.429678	4	22	4	12	MDMNFGFGNDSFFEQGNRSTDKEEVEEINKIESNEIGKENGKIDEEKELPKELCAPITIKLLLNKMMNSENFEIHDFQISGIIVFGKITNVKELASAIIFEICDYTGTIEAKYNKDAKNDKIKNHIENLKVNDHVKIVGGVYSPESKTEQVQISISYINKVDDWVSYFTYFTSDIIYCYLKLLKLKNMNMSNGTNNQEKPWSHINLDSYYNQMDEIDSDIIKYLHTTTEKYANQDDIFNNLRKYHSEIDIKKSLTKLIEQYDLAQYEDIISIP
PBANKA_1439200	A0A509ASB6	Polyadenylate-binding protein OS=Plasmodium berghei (strain Anka) OX=5823 GN=PBANKA_1439200 PE=3 SV=1	93.3	0	0	0	0	0	0	0	32314	0	0	0	48348	0	0	27397	74304	2	0.646969	-0.159162	0.266094	0.394485	4	7	4	7	MIANSTNIMPPSFSTASLYVGDLSEDVTEAVLYEIFNTVGHVLSIRVCRDSVTRKSLGYAYVNYHNLADAERALDTLNYTNIKGQPARLMWSHRDPSLRKSGTGNIFVKNLDKTIDNKALFDTFSMFGNILSCKVATDEFGKSKNYGFVHYEDEESAKEAIEKVNGMQLGSKNVYVGHFIKKSERATNDTKFTNLYVKNFPDTVTEAHLKQLFSPYGEITSMIVKSDNKNRKFCFINYSDADSARNAMENLNGKKITEDGKIDYNYDPKKEESEKAANENYNNNNTTSEENATTSETPAEKKTTDSESATNKDATPGEDQTSANGTTTTVTSTTDAKTEETPNDNTANAGINASITEKKDKKKSGESTETPNILYVGPHQSRARRHAILKAKFDTLNTE…
PBANKA_1106700	A0A509ALP7	60S ribosomal protein L4, putative OS=Plasmodium berghei (strain Anka) OX=5823 GN=PBANKA_1106700 PE=3 SV=1	46.1	0	0	0	0	0	66004	50188	166443	44050	0	0	310086	0	0	60014	166088	2	0.430495	0.182638	0.021725	0.353797	11	50	11	28	MATIRPLANVYSINGKKVVGEVEIPVVFQTPIRNDLIEYIFTNISKNTRHPYAVKLGAGYETSAESWGTGRAVARIPRVPGGGTHRAGQAAFGNMCRGGGMFNPTKIWRRWGRKVNLKEKRYAVCSSIAASGISSLVLARGHRISNLKEVPLVASNDIESIQKTKDALKFLISLGLRDEVNRLIKSKKIRAGKGKMRNRKYKISNGPLIIYNKDSGIKKAFRNIPGVDLCNVTKLNLLKLAPGGSIGRLCIWSEDAFKKLDVIYGKSFQKYVTKKHYILPKPIVNNADIYRIINSDQVQASLLDKKNPCKKRTQNKNSLTNFAVRCRLNPAYKLLRSLAVRRMKKSISENAKDKKEKKTKKKIEKKELQKVNNAYYNAIATSVKRKKQKEEKKAKSKKD…
PBANKA_0906500	A0A509AJD2	60S ribosomal protein L28, putative OS=Plasmodium berghei (strain Anka) OX=5823 GN=PBANKA_0906500 PE=3 SV=1	14.6	0	0	0	0	0	54675	26793	0	0	0	0	0	86871	0	0	26063	2	0.932224	0.0159082	0.623604	0.297831	2	4	2	22	MANISGALVWELTKNNNCFLKRNKTGKKEKLLCDPYNLRCKNTKNSSGLVNDNAVNIRLNKGKVVLCVKSTTKKHIRNKQLRTKNTKRAESLIEEYTKNINVPKQTLLKKYKRLSKTYRINTKSNK
PBANKA_0314700	A0A509AFG8	Replication factor C subunit 2, putative OS=Plasmodium berghei (strain Anka) OX=5823 GN=PBANKA_0314700 PE=3 SV=1	37.6	0	0	0	14533	0	0	0	0	0	0	0	191069	0	0	32545	117288	2	0.485707	0.182622	0.250406	0.288787	5	11	5	15	MSNLPWVEKYRPKKLDDIVHQTNAISMLKEVIKTKNMPHLIFHGPPGTGKTSAINALAHELFGKENINERVLELNASDDRGINVVREKIKAYTRISISKNKINTETNEQLPPWKLVVLDEADMMTEDAQSALRRIIEIYSNVTRFILICNYIHKISDPIYSRCSCYRFQGIPINIKKEKLLYICKNENIDISDNALSKIIETTQGDLRRAVSVLQLCACIDSKITVDSVLDVSGLPGNDVILKIVNSCKMKNFKILEKTIQDIIEDGFDVSYIFKALNEYFVMSQDINDSIKYQILMELSRHDFRLHNGATKYIQLMSFASSVHSLLNQA
PBANKA_1145800	A0A509ALB6	Membrane associated histidine-rich protein 1a OS=Plasmodium berghei (strain Anka) OX=5823 GN=PBANKA_1145800 PE=4 SV=1	20.4	0	0	0	17474	0	27121	23243	62630	0	0	69228	284892	25639	0	0	95307	2	0.242453	0.399279	0.404053	0.28226	3	22	3	25	MAYTEKEGKEESKIMHPQDEDPAELSKYIANESSATFSYLKKAENYMKKFYESYLVPNSSNDTSRENSDDESEEDRKKNEGNGKKEKRKRKKKPQTLCSKVKYNITKKLTLPNLVIIGFIACFMMFTYSRIAQHRNQIGYAAGFLGDVSHERVARPPGCTCGGHKAHGTTRGTTTHRTN
PBANKA_1034400	A0A509AJX6	Plasmepsin IV OS=Plasmodium berghei (strain Anka) OX=5823 GN=PBANKA_1034400 PE=3 SV=1	50.5	0	0	0	21032	0	59238	21744	207912	0	16590	195998	519498	0	0	22663	165990	2	0.0659584	0.755052	0.228142	0.232689	9	61	9	22	MEYSEKESNYSNGLMRNGSAFGHLKFDNIKSFKIQKKFQALYFIIFICIIGSIFAYMVGTNYYSTKTIDIDKIIANSEYLTIRAKIERPRDKLFKKVMNKNVSNYIKESFKLLKSGLLKKEHLTKYEDSIELDQSLGLSFIGTAELGNNKQSFSFILDTGSANLWVPSKECKSGGCAYKHRYDSSASNTYEKDGTPVSILYGSGGIKGFFSNDMFTIGHHTIPYKFIEVTETDDLEPIYTASPFDGILGLGWKSLAVGNVEPVIVEMKKTGQIENAVFSFYLPEADDSVGYFTIGGIEESFYTGDVTYEKLTNESYWQINLDVDFGIVALNNANAIVDSGTSAITAPSDFLNKFLNSIMSIPVPFIPLRIVLCHDTNLPTLKFRSKSTEYTIEPKHYLI…
PBANKA_1326800	A0A509AQN9	Replication factor C subunit 3, putative OS=Plasmodium berghei (strain Anka) OX=5823 GN=PBANKA_1326800 PE=3 SV=1	39.3	0	0	0	0	0	18180	12191	76815	0	0	0	119871	0	0	28981	54379	2	0.926041	-0.0215793	0.373422	0.228441	3	12	3	11	MIDANPPKIDEQIPWVEKYRPSVLNDIISHEQVISTIRKFVEKGELPHLLLHGPPGTGKTSTILAVCKELYGESRSSFVLELNASDDRGITVVREQIKTFAESKNHYNICERTSLKLIILDEADHMTFPAQNAMRRIMENYAKNVRFCLICNYVNKITPAIQSRCTSFRFSPLKEEYMLNKALDIAKSENVNLTKNGVESLIRVGRGDMRRILNCLQVVSLSHKNMVIDENVILSTLDIPLPTEIKFILEHLTKSTIKESYEIITKLQEDKGYSIKDIMICLYETVLTYDYPDSAICLLLKNFGEIEERCASGTTEQITLSSLISAFIEFRNELFKLKYEPNKA
PBANKA_0804300	A0A509AGH6	DNA mismatch repair protein MSH2 OS=Plasmodium berghei (strain Anka) OX=5823 GN=PBANKA_0804300 PE=4 SV=1	98.1	0	0	0	0	0	0	0	0	0	0	0	33780	0	0	13485	59105	2	0.774729	-0.106307	0.508577	0.22729	2	4	2	2	MENDTKLLVSLISELRNNIRYVGICIYNSTTNEFSLSEYIENDHFTTLESILIQTDPDSLIYLPCNNILDNKRIKLICNLCEIKLCELNKDIFQIMSIETDLEKLIKVNDDVKNYVSFLNLTLACKALSSIIKYLNLLNEDSAINKCTLKWYNISKYVKLDKAAICSLNINTYISKEQKNGIGGSQQMLSQSHGGNTMTLYKFLNKCKTKIGERKLLKWIMHPIRDEKKINQRLDMVEIMNDDQALRSMIQADYLRKVCDLDLIIKKLKIANNIIKNSNMSDNHGAIQNRSLGNSNNKCTIEDLVKLYDTVVASKNIYHALDEYNNGTQKKNNKKTLEENFIIPLKSIIISLTSFLKLIELTVDFDQIIKNQFLISPNFDDNLMALSKEKEEIYKQILH…
PBANKA_1329300	A0A509AQ19	40S ribosomal protein S3, putative OS=Plasmodium berghei (strain Anka) OX=5823 GN=PBANKA_1329300 PE=3 SV=1	24.7	0	42160	39444	158540	0	355221	158828	378219	161977	50319	88879	404628	0	33874	104761	384226	3	0.0496454	0.454056	0.443575	0.2174	11	79	11	51	MSPPISKKRKFINDGVFQAELNEFLARILAEDGYSGVEVRVTPIRTEVIIRATRTREVLGDKGRRIRELTSLVQKRFFNKLTNSVELFAERVENRGLCAMAQAESLRYKLLKGLAVRRACYGVLRHIMESGAKGCEVIVSGKLRAQRAKSMKFRDGYLISTGEPSKRFVNTATRSAQLKQGVLGIKVKIMLPTAIDTKTGLPSILPDNISVLEPKTDTVDAL
PBANKA_0941900	A0A509AMA0	Histone H4 OS=Plasmodium berghei (strain Anka) OX=5823 GN=PBANKA_0941900 PE=3 SV=1	11.4	40939	46993	50174	208584	99151	529932	72472	465428	251591	0	136998	753888	60363	41984	88792	454504	4	0.845602	-0.0834791	0.533727	0.213933	7	64	5	56	MSGRGKGGKGLGKGGAKRHRKILRDNIQGITKPAIRRLARRGGVKRISGLIYEEIRGVLKVFLENVIKDSIMYTEHAKRKTVTAMDIVYSLKRQGRTLYGFGG
PBANKA_0405400	A0A509AG75	40S ribosomal protein S12 OS=Plasmodium berghei (strain Anka) OX=5823 GN=PBANKA_0405400 PE=3 SV=1	15.5	0	0	0	117673	0	331798	68194	214318	141793	0	75904	189177	0	0	80241	374108	2	0.621958	0.170477	0.516542	0.198292	5	34	5	37	MADAESVDNNVVIEEKAVFDNVTAIQKVIKNALVHDGLKIGIREVIKSIESKEAKVCFLSNVCSEPAYKKLVTALCAEKQIPLFMIDNDSKDLGQWSGLFKVDKEGNARKIIGASSVAIIDFGEESAERDFLMSQKPTATAA
PBANKA_1351900	A0A509AQQ7	60S ribosomal protein L6, putative OS=Plasmodium berghei (strain Anka) OX=5823 GN=PBANKA_1351900 PE=3 SV=1	26.7	0	0	0	0	11577	67590	41465	46992	53444	0	22534	236172	17200	0	17968	212095	3	0.163551	0.318971	0.471876	0.196831	5	23	5	22	MAKNTKSGASADDKKKTLKHYVIKGQKKTLTPVRAKKTIAKKYYGKKLASKKKYIVQRKMRKSIQVGKVAIILTGKHMGKRCIITKVLKSGLLAVIGPYEVNGVPLKRVDPRYLIVTSTNVFDFNNLSQIKDKFIQAAERINDEIFIKSIDIKKRQKKLLKNKNESLFMNDVIQQIKEIRDSDPKMKRIKLLQKQLGDLLKPEISKDKMFRSYIKSKFTLRNNMSFHNIKF
PBANKA_1030600	A0A509AN97	p1/s1 nuclease, putative OS=Plasmodium berghei (strain Anka) OX=5823 GN=PBANKA_1030600 PE=3 SV=1	38.8	0	0	0	25660	0	22945	29785	124493	19216	0	52445	259539	0	0	28020	97092	2	0.117862	0.437489	0.450592	0.159353	8	36	8	27	MGFIKYLISCGLFSLLLLKEAVCWSDEGHMLISAIAYEGLNDKEKKILTQIFQNYKEDNNFNNHIYAAVWPDHIKYYEHPVDTTKRMDGMSIMDKWHYINVPYNPTNINLDMYHKEYYKDTDNSLTISRRIFEDLKSMEKKKNYGSYFSYNFQLRYFIHVFGDMHQPLHTTTFFNKNFIKGDFGGTAINVNYNNRTEKLHHLCDCVFHARDKKWPHATVEEVTNDARALMNTYPPEYFGNRLNNGMNEYEYLGYIVEDSYSQAIDHVYYTFPFDSLNKHTVYSLPNAYVINLKKILNEQIALGGYRLTRYLKIMIENIPDDLLQTGTI
PBANKA_0717800	A0A509AG59	Ribosomal protein L15 OS=Plasmodium berghei (strain Anka) OX=5823 GN=PBANKA_0717800 PE=3 SV=1	24.1	0	0	0	20470	0	196074	61011	62074	59480	0	26573	96765	41859	0	36147	81225	3	0.783186	-0.0949016	0.711349	0.15627	3	19	3	18	MGAYKYIQEIWKKKQSDAMHFLLRVRTWEYRQLPVVHRVSKPSRPDKAKRLGYKALQGFVIYRVRVRRGDRKKRVRKGVVHGKPKHQGVHKQKSARNLKSVAEGKVGKSICGNLRVLNSYWVGQDAVYKYYEVILVDPMHNAVRNNPSINWICDSVHKHRELRGLTSAGKKYRGLRVKGHLSAKSRPSIRANWKRRQLIKLKKRR
PBANKA_1455100	A0A509ARE2	Replication factor C subunit 4, putative OS=Plasmodium berghei (strain Anka) OX=5823 GN=PBANKA_1455100 PE=3 SV=1	37.6	0	0	0	0	0	0	0	120062	0	0	0	179095	0	0	16332	50272	2	0.476045	0.201165	0.673739	0.149785	9	26	9	37	MEEDSFKNRLLKRNIDIWIEKYRPEYLEDVVGNPFVINTLKSIIVSGNMPNLLLAGAPGTGKTTSILCLASEMLGSQAKKAVLELNASDDRGINVIRDRIKSFAKEVISLPPGRHKIIILDEVDSMTTAAQQSLRRIMELYSDTTRFALACNQSEKIIDALQSRCAIIRYFKLTDDQVLKRILKICEYENIKYTDDGLETITFIADGDLRKAVNCLQSTYAGLEVVNKENVLNICDIPSPERIENLLKHCISSEWRKAHDIAYDMIKEGHTPFDVALTSSNVLRRYDLGSEAIQIEFLKIGAMACNTMASGLSSVIQMDKLIADWCIAAKTLRGKC
PBANKA_1204400	A0A509AMU6	DNA/RNA-binding protein Alba 3, putative OS=Plasmodium berghei (strain Anka) OX=5823 GN=PBANKA_1204400 PE=4 SV=1	12	0	0	0	71761	46829	304733	0	298955	189840	49231	47448	334748	0	0	72457	291271	2	0.123867	0.712803	0.733886	0.147613	6	58	6	66	MTSTEDISQERAENSIQVSMTKKPTFYARIGKRMFTGNEEKNPFDEVIITGLGSATKIAIGAASIMEKEDIGQIIKIQTAYFSSDRINRRIPKITIVLKKHPNFVAN
PBANKA_1324400	A0A509APY8	60S ribosomal protein L27, putative OS=Plasmodium berghei (strain Anka) OX=5823 GN=PBANKA_1324400 PE=3 SV=1	16.9	0	0	0	34063	0	298889	61667	68236	82536	21666	29037	227449	0	0	42390	154514	2	0.117781	0.370186	0.517785	0.143383	2	19	2	16	MGKLLKPGKVVIMLNGRRAGKKAIIINTYEGQTRERPYSYCLVAGIEKHPLRVTKKMSKGKIIKRSKVKAFVKYINVNHILPTRYQVANDFDIKSLASDDILRSKNKKKEIKKLGRVFRDKFLDPINKKTGEVSKDVSFLHKKLYF
PBANKA_1206900	A0A509ATN3	Tubulin beta chain OS=Plasmodium berghei (strain Anka) OX=5823 GN=PBANKA_1206900 PE=3 SV=1	49.8	124177	1135559	654105	1857549	247250	2148913	2126942	4166804	406872	371316	633856	3632157	163704	180005	840104	2403750	4	0.824854	-0.0569977	0.4877	0.140687	29	771	29	67	MREIVHVQAGQCGNQIGAKFWEVISDEHGIDPSGTYRGDSDLQLERVDVFYNEATGGRYVPRAILMDLEPGTMDSVRAGPFGQLFRPDNFVFGQTGAGNNWAKGHYTEGAELIDAVLDVVRKEAEGCDCLQGFQITHSLGGGTGSGMGTLLISKIREEYPDRIMETFSVFPSPKVSDTVVEPYNATLSVHQLVENADEVQVIDNEALYDICFRTLKLTTPTYGDLNHLVSAAMSGVTCSLRFPGQLNSDLRKLAVNLIPFPRLHFFMIGFAPLTSRGSQQYRALTVPELTQQMFDAKNMMCASDPRHGRYLTACAMFRGRMSTKEVDEQMLNVQNKNSSYFVEWIPHNTKSSVCDIPPKGLKMAVTFVGNSTAIQEMFKRVSDQFTAMFRRKAFLHWYT…
PBANKA_0316000	A0A509AF53	Replication factor C subunit 1 OS=Plasmodium berghei (strain Anka) OX=5823 GN=PBANKA_0316000 PE=3 SV=1	99.2	0	0	0	0	0	0	0	0	0	0	0	158171	0	0	18160	87875	2	0.93797	-0.0182176	0.606965	0.127887	4	10	4	5	MRSKEKKLFSDNSSDEGRKKKRLKKISNNLFENEDQNVLNNSDAKIVVEIKDESDDELAKDASTTNNTTNKTIEKNSSKKNAYYDISSYFKPVSKNTPKEQTGNNSNINNQSKKIPLENVDEYFNIIETGSKKVTTNPKRERSHDSDILEQNRYKKKYVFTEDNIILQKNETNVSQNFDYLPFINKKFVLTGVFKTYNRDDLQNKIKEHGGSVMSAVSSKTHYLIHGEYLEDGRLYNEGKKYQKAYELSKQSKSIIKILNEEELLELLPKQKNENSQNYQSNTEQNHHILNQNMKNEQEQEQNVSHVLNQLWVDKYKPTKIEDLVGNTQNVFKLKTWLSSWDDVCIKGLKKQVTKTFRGNFENVNAKCALLSGPAGIGKTTTAKIVSTSSGYNVIEFNA…
PBANKA_1364200	A0A509APV4	60S ribosomal protein L17, putative OS=Plasmodium berghei (strain Anka) OX=5823 GN=PBANKA_1364200 PE=3 SV=1	22.8	0	27387	0	38042	0	208215	156624	56045	115964	35895	0	164550	0	0	45498	170577	2	0.604818	0.191207	0.611587	0.122944	2	21	2	16	MVKYAKQIRNPGKCAKAAAVDLRVHFKNTYETARAIRRMNLLEAKKYLNAVIEKKRCVPFRRYNGGVGRTNQAKEFNHTQGRWPVKSCKFLLNVLDNVQANAESKNLDVGKLKIIHIMVNRARPGRRRTFKAHGRINPFMSSPCHIQVIAREITKPAKKSLLTNKEKQKQLPFRITLKKLVKLNISQQRINKSKKLAK
PBANKA_1305100	A0A509ART6	60S ribosomal protein L1, putative OS=Plasmodium berghei (strain Anka) OX=5823 GN=PBANKA_1305100 PE=3 SV=1	24.8	0	0	0	0	0	95029	0	161387	0	0	0	181072	0	0	33553	80100	2	0.638095	0.127331	0.576761	0.111529	4	10	4	23	MSKLNQDLLKKAINDVFEGTKQKKRKFVETIELQIGLKDYDTQRDKRFSGTVKLSNEVRKKLKVCILGDAVHSEEAQKLKLDYMDIEAMKKLNKDKTLVKKLAKKYDAFLASQVILPQIPKLLGPGLNKAGKFPSLITHNDKINDKILELRSSIKFQLKKVLCMGVPVGHANLKEEELRSNIVHAINFLVSLLKKNWQNIRTLHIKSTMGKPQRIYG
PBANKA_1355100	A0A509APL1	40S ribosomal protein S6, putative OS=Plasmodium berghei (strain Anka) OX=5823 GN=PBANKA_1355100 PE=3 SV=1	35.4	0	0	0	19660	0	0	81246	97329	41516	0	0	45244	16080	0	26148	44662	3	0.34967	-0.281304	0.71696	0.111189	4	12	4	16	MKLNISNPLNNVQKSIEIDDEKKLLPFMERRIGNVVPGDSIGEEFSGYIFRITGGNDKQGFPMMQGVLTNHRVRLLFKKGMKCYRPRKKGERKRKSVRGCIVGQDLSALNLALVKKGDNEIEGLTDKAVGKKLGPKRASKIRKLFNLDKTDDVRKYVIGRAITKNGKTRFIKPKIQRLVTEKRLLRKRSLIAAKEKRAAEKKQAMKEYKQLLRKYKSELITKKDNDTGKKIKVKKNISKDAKKNNKAKDSKDDKLKTKKNVDKKSENSKKFPNKKINEKQPKADNKNAKVDKKAAAKTINEQNKPGKKKK
PBANKA_1360300	A0A509AQX1	DNA/RNA-binding protein Alba 4, putative OS=Plasmodium berghei (strain Anka) OX=5823 GN=PBANKA_1360300 PE=4 SV=1	42.1	0	47940	0	59659	45543	311365	133741	653679	213122	33316	42194	472896	26007	0	112564	365583	3	0.341215	0.37069	0.797178	0.103008	10	86	10	32	MENNKKNNQKQNSIDETEFPNSKVLLVSVKRTRRFLERTARELLAGGTRYIILSGLGDALPLCVQLQASLQSKNAATVVKIETSYSYFNTNYSYTPGLKIYMEKHPEFKGSRISPGYVSFCEKPDKFTPIFDETPNEYICSVNAGDNNLHVGGEGINAAFSELLSSHGHEVDKYESLFKELLSKAVKENSEKPDDEVKSILYESVEKKYPDVKLALCRVRNSLKKGSDNTTGSVFIVTFKKKFPHKKEKNMGMVYVVGPKGKNFSSVEDFLDAVHETAENLMTALCDYNGLVKREEIKHVRMNTCRICLFSGHAFKHSNASKLDVAKSILNGLAVGYRHGPSPRLNFAYDENVFKDAWIETTGLQVFNHNEKEQ
PBANKA_0941800	A0A509AKM3	Histone H2B OS=Plasmodium berghei (strain Anka) OX=5823 GN=PBANKA_0941800 PE=3 SV=1	13.2	0	88798	0	161721	114933	260829	122076	248326	313148	0	33199	562540	85385	0	63330	248762	3	0.872873	-0.0769987	0.827598	0.0981914	4	30	4	30	MVSKKPAKEKKATNGATDGKKKRKKSRYDSYGLYIFKVLKQVHPDTGISRKSMNIMNSFLVDTFEKIATEASRLCKYTKRDTLSSREIQTAIRLVLPGELAKHAVSEGTKAVTKFTSK
PBANKA_1205000	A0A509ALT6	Single-strand telomeric DNA-binding protein GBP2, putative OS=Plasmodium berghei (strain Anka) OX=5823 GN=PBANKA_1205000 PE=4 SV=1	27.8	0	0	0	0	0	56418	23711	65129	0	0	0	56799	0	0	23571	98415	2	0.282558	-0.202958	0.657052	0.0914725	2	7	2	11	MENNQNSPTKGCRVYVGNLPWKVTWPVLKDHMKKVGDVLRVDIFEDTQGRSKGCGIVEYSSCEEAQEAINRLNDSKLEDRLIFVREDREENSGSFEKKRFSNIRKDKFYDPRRRRDFDYRKDFRRDEYKKDFRRDNRKDEYRKGSDFRRGVRRNCTLVVYNLPPQSTWKELKDLFKKHGRVIRADLKNEETTSKEITGTVIMETDYDAKNAIDALNFCNFDGYILKVNYENNE
PBANKA_1231700	A0A509AR54	60S ribosomal protein L2, putative OS=Plasmodium berghei (strain Anka) OX=5823 GN=PBANKA_1231700 PE=3 SV=1	27.9	0	28630	0	0	23277	254821	86136	112175	75699	0	37442	150527	31460	0	44497	149109	3	0.900097	-0.0395684	0.788643	0.0902441	4	22	4	18	MGRVIRGQRKGRGSIFKSHSHHRKGAAKLRHLDFCEKKGYIKGLVKDIIHDPGRGAPLAKILFKKTEKYGKKEELMVAAEGMFTGQYISCGTKAPLSVGNVLPIGKMPEGTLICNLEHMAGNRGTLVKASGCYATVVGQSEDGKKTKIRLPSGAKKTIDSRARAMVGVVGAGGRIDKPILKAGVAHHKYRVKRNCWPKVRGVAMNPVDHPHGGGNHQHIGHPSTVSRSAPAGQKVGLIAARRTGLLRGAKKTKLVGKSEN
PBANKA_1018500	A0A509ANA0	Nascent polypeptide-associated complex subunit beta OS=Plasmodium berghei (strain Anka) OX=5823 GN=PBANKA_1018500 PE=3 SV=1	19.9	0	0	0	95475	0	0	0	245075	91663	0	0	137962	0	0	50851	82403	2	0.577573	0.202484	0.809395	0.0841969	2	8	2	10	MEKISPEILAARAKLKERMGASQRQIGGKGTARRKIKKVHKNSMPNEKKINLILKKIGASYFGDVDEICIYKNSDKYLEFKRPKLSASLQSNTYIVTGKFTEKTIDINKIFEGLQGNKNVDMKLLERLKNDPTIKSLMAKDKEKNKKKEDIEQSAEIPDLVEDFEEVSKEKTEE
PBANKA_0405500	A0A509AFE2	60S ribosomal protein L7, putative OS=Plasmodium berghei (strain Anka) OX=5823 GN=PBANKA_0405500 PE=3 SV=1	30.5	0	23159	0	32557	17682	215673	65771	160690	61039	0	30218	196657	18949	16500	31402	132378	4	0.550162	-0.110195	0.700012	0.0730556	3	27	3	14	MADRYEEKGENEIGNNMAALKAKRAKNAAAVKKRIMKKLKETKLINKKKRIELRARTLKYEKEYEEERRKITELKREARKNNCFYREAEKKVVFVIRLKGVNKLPPKVKSVFRLLRLLQVHNGVFVKVNKATKEMLKIVEPYVTYGYPSLSTIRNLIYKRGYIKDGKVRRYSRKKIQNNEDISKHLGKYNVHGIEDMIYQIYTCGSVFKKVNNFLWAFKLKPPKKGFKAKRHGFNEPRPGDWGNREEHINELVNRMI
PBANKA_1013100	A0A509AL29	60S ribosomal protein L14, putative OS=Plasmodium berghei (strain Anka) OX=5823 GN=PBANKA_1013100 PE=3 SV=1	17.9	0	0	28747	125958	0	482585	87832	300345	85564	0	0	321697	0	0	102013	373811	2	0.179104	-0.482472	0.815392	0.0650085	5	38	5	35	MPKTALTEDEKLNLSKKKLLFNRYVEPGRLCLIEYGPYAGKLCFIVDIITITRVIVDGAGITGVPKTIMPIKRLKLLKQRVKISANSKTGLLRKEVDKSKVLDEFNKSNLGKKIMIKQKRDLATDYERFQIYYANKELKKKMNFIKSQKKGQKSKA
PBANKA_1022000	A0A509AL04	40S ribosomal protein S25 OS=Plasmodium berghei (strain Anka) OX=5823 GN=PBANKA_1022000 PE=3 SV=1	11.8	0	0	22930	58446	0	403784	50814	244078	31708	0	39327	190155	0	0	99519	299595	2	0.361523	-0.224356	0.835231	0.0643832	4	29	4	39	MPPKERKTKEQIAAAAAASGRSKKKKWGKGKNKEKLNHAVFIDKSLQSKILEVQNMKVITPSTISDKYKVNLSVARSVIKYLAEKNLIKEVCIQSHSQKLYTKVA
PBANKA_0617100	A0A509AHZ8	60S ribosomal protein L11a, putative OS=Plasmodium berghei (strain Anka) OX=5823 GN=PBANKA_0617100 PE=3 SV=1	20.2	0	0	0	103583	0	311876	181737	220257	186089	0	0	299425	0	0	58550	272564	2	0.937699	-0.0328459	0.832533	0.0620839	2	20	2	13	MEKKEDNVMREIKVNKLILNICVGESGDRLTRAARVLEQLTEQKPIFGKCRFTIRSFGVRRNEKISCFVTVRGKKALEILEKGLKVKEYELRRKNFSDTGNFGFGIQEHIDLGIKYDPSTGIYGMDFYVHLSRPGYRVTRRRRKRSTISKTHKVTKEDAMKWFQTKFDGILLK
PBANKA_1217700	A0A509AQD4	ATP-dependent RNA helicase DDX6 OS=Plasmodium berghei (strain Anka) OX=5823 GN=PBANKA_1217700 PE=3 SV=1	49.3	0	0	0	62714	0	187683	70323	492855	0	0	0	306078	0	0	42731	234298	2	0.144988	-0.478123	0.820691	0.0574135	8	50	8	23	MSYKTNCVASNANTNALNNSNNLNKIEDNVIFDEAWKKKILEPLKDPRYKTEDVTKTKGNEFEDYFLKRELLMGIFEKGYEKPSPIQEESIPVALAGKNILARAKNGTGKTAAFAIPLLEKCNTHKNFIQGLILVPTRELALQTSAMIKELGKHMKIQCMVTTGGTSLREDIMRLYNAVHILCGTPGRILDLANKDVANLSGCHIMVMDEADKLLSPEFQPIVEELMKFLPKEKQILMYSATFPVTVKEFRQIYLSDAHEINLMDELTLKGITQYYAFVKERQKVHCLNTLFAKLQINQAIIFCNSITRVELLAKKITELGYSSFYIHARMSQTHRNRVFHDFRNGACRCLVSSDLFTRGIDIQSVNVVINFDFPKNSETYLHRIGRSGRYGHLGLAIN…
PBANKA_1202400	A0A509APU4	60S ribosomal protein L13, putative OS=Plasmodium berghei (strain Anka) OX=5823 GN=PBANKA_1202400 PE=3 SV=1	23.8	0	0	0	0	0	185822	102283	120055	0	0	27631	141320	0	0	33772	138096	2	0.591497	-0.120985	0.804531	0.0536533	4	26	4	23	MYKKEYVIDCKGHMLGRLASIIAKELLNGQRIVAVRCEDIDISGSLYRNKLKYQEFLRLRTNTNPKKGPLHLREPSKILWRCVRGMLPHKTPKGKIALSKLKVLVGMPYPYDKKKKYVLPGALRAFRLQKHRHFCRLGTLSSRVGWNYDELVKKKEKVRKELSKIYYKKKINTLNEKKKIKEEALGLIKPEERKILENFGYI
PBANKA_0522700	A0A509AF83	Tubulin alpha chain OS=Plasmodium berghei (strain Anka) OX=5823 GN=PBANKA_0522700 PE=3 SV=1	49.7	80081	406739	234461	661789	183925	822758	711338	1432634	153657	90136	265129	807675	66456	146021	352402	839517	4	0.0705809	-0.461846	0.854226	0.0455795	20	639	3	50	MREVISIHVGQAGIQIGNACWELFCLEHGIQPDGQMPSDQVVAGGDDAFNTFFSETGAGKHVPRCVFVDLEPTVVDEVRTGTYRQLFHPEQLISGKEDAANNFARGHYTIGKEIVDICLDRVRKLADNCTGLQGFLMFNAVGGGTGSGLGCLLLERLAIDYGKKSKLNFCSWPSPQVSTAVVEPYNSVLSTHSLLEHTDVAIMLDNEAIYDICKKNLDIERPTYTNLNRLIAQVISSLTASLRFDGALNVDVTEFQTNLVPYPRIHFMLSSYAPIISAEKAYHEQLSVSEITNSAFEPASMMAKCDPRHGKYMACCLMYRGDVVPKDVNAAVATIKTKRSIQFVDWCPTGFKCGINYQPPTVVPGGDLAKVMRAVCMISNSTAIAEVFSRMDQKFDLMY…
PBANKA_1416300	A0A509ATZ6	40S ribosomal protein S19, putative OS=Plasmodium berghei (strain Anka) OX=5823 GN=PBANKA_1416300 PE=3 SV=1	16.9	0	24273	0	26300	0	281641	147201	135261	88251	35233	0	63919	47952	0	0	201247	2	0.828169	-0.0874674	0.929713	0.0419079	3	33	3	25	MEDANKPKKRTFRTFHYRGIELDKLLELNQEELVKLLPARQRRKFRRGIDKKAKSLLKKLRKAKKECEIGEKPKPIPTHLRNMTIIPEMVGSIVAVHNGKQYTNVEIKPEMIGYYLGEFSITYKHTRHGKPGIGATHSSRFIPLK
PBANKA_0819900	A0A509AJH3	Nucleosome assembly protein OS=Plasmodium berghei (strain Anka) OX=5823 GN=PBANKA_0819900 PE=3 SV=1	31.7	0	29750	0	166717	0	198540	188475	470553	18699	40582	158508	659685	0	0	68412	389300	2	0.429357	0.333581	0.923774	0.0307363	11	85	11	31	MKRDRSENSVENTTDPKHSKIDNDDPLIPFIKDFEDIQKDIEQLDIKCAHEQMNIQKQYDEKKKPLFDKRDVIIQKVPCFWANTLRKHPALSDIVPEDIDILNHLTTVDLKDNMDNNGSYKITFTFNEKAKEYMEPLVLVKHVTFDNNQEKVVECTRIKWKEGKNPIAAVSNSRIDIDNEMPKWSVFEWFTTEELQDKPDLGEIIRREIWHNPLSYYLGLEDFDDFDEDFDDEDDEDEDDENEDEDEDDDEENEEDEDDEDGKDNDD
PBANKA_1117500	A0A509ANZ6	Ribosomal protein L27a, putative OS=Plasmodium berghei (strain Anka) OX=5823 GN=PBANKA_1117500 PE=3 SV=1	16.8	0	12405	0	0	18085	132922	33054	46721	93026	0	0	121690	28345	0	30067	0	2	0.854261	-0.0662169	0.984598	0.00806074	3	15	3	28	MATRFKKNRKKRGHVSAGHGRIGKHRKHPGGRGKAGGMHHMRINFDKYHPGYFGKVGMRHLNLLKNRKYCRTINVDKLWGLLPEEKKKEFAKNENIAPVIDVTRVGYFKVLGNGHLEHNQPIVVKARYFSSMAEKKIKAVGGQCILVA
PBANKA_0807600	A0A509AI36	40S ribosomal protein S11, putative OS=Plasmodium berghei (strain Anka) OX=5823 GN=PBANKA_0807600 PE=3 SV=1	18.7	19398	98937	49591	80023	0	605641	217681	347177	145921	52828	68800	487330	44432	0	83874	317247	3	0.218801	0.289493	0.998812	0.000425136	5	49	5	34	MATALDVQHERAYQKQEGASFFNSKKLKKGSKSYTRYWKNVGMGFAVPKEAKEGVYVDKKCPFTGNVSIRGRILKGMVISNKMKRTIIIRRNYLHYVKKYNRFEKRHKNIPCHCSPCFDVKEGDIVTVGQCRPLSKTVRFNVLHVEKHQIFGSARKQFVLF
PBANKA_0912300	A0A509ALU8	Tudor staphylococcal nuclease, putative OS=Plasmodium berghei (strain Anka) OX=5823 GN=PBANKA_0912300 PE=4 SV=1	117.8	0	0	0	25894	0	57344	39338	116286	40173	0	0	67771	0	0	17480	101452	2	0.0986618	-0.348498	0.971734	-0.00567614	3	16	3	4	MERLIGVVKQVISADTYVLLGPKKNGIAQERQVSLACIQCPKLYVKSQTLEKNEEPFAWESRELIRKMIIGKNVSFTLEYVYNNRQYCSVYFEDTNLSILLLEKGYANLVFNKNVKTNVYADLEPYYLEAQNKNLGIFGNNINNFVRNIININNDKNENKKIYDTLVNKKVHCVIEHVRDGGHLRVYAQLEKNENKDEGNKKNNVKNESKKNGKGGKGAKKKHEDNTINQTGEKYLTMYYFSISLCGIIVDMYKKEVINNVETIKEETYATETKKFVEYRLLNRDVEIEIKHIDNNLNLYGNIYYKLGNICLLLLKNGYAYINDYTIKYVENPLEYKKALDEAVKLRKKKWINYSEKEVDFEKEYITTVIEVLYGDIIIVDYKNEERRLYLSSIKCEKH…
PBANKA_0405300	A0A509AFQ8	40S ribosomal protein S23, putative OS=Plasmodium berghei (strain Anka) OX=5823 GN=PBANKA_0405300 PE=3 SV=1	16.1	0	0	0	33960	0	433080	67747	252171	71170	0	46812	299497	36706	0	44880	84919	3	0.640536	0.132594	0.977395	-0.0100275	2	15	2	14	MGSGKPSGLRSARKLRIRRRTQRWADKGYKKSHLGTRWKSNPFRGSSHAKGIVVEKVAIEAKQPNSAYRKCVRVQLIKNGKKITAFVPGDGCLNFIDENDEVLVSGFGRSGHSVGDLPGVKFKVVKVARVSLLALFKEKKEKPRS
PBANKA_0417700	A0A509AIG6	Tubulin alpha chain OS=Plasmodium berghei (strain Anka) OX=5823 GN=PBANKA_0417700 PE=3 SV=1	50.2	37029	1009561	500004	1084811	236607	1373839	1791126	2386325	221958	241672	487398	1884462	46899	194669	471419	1342997	4	0.765878	-0.0716522	0.890448	-0.036468	20	480	3	47	MREVISIHVGQAGIQVGNACWELFCLEHGIQPDGQMPPDQAGRANDDAFNTFFSETGAGKHVPRCVFVDLEPTVVDEVRTGTYRQLFHPEQLISGKEDAANNFARGHYTIGKEVIDVCLDRIRKLADNCTGLQGFLMFSAVGGGTGSGFGCLMLERLSVDYGKKSKLNFCCWPSPQVSTAVVEPYNSVLSTHSLLEHTDVAIMLDNEAIYDICKKNLDIERPTYTNLNRLIAQVISSLTASLRFDGALNVDVTEFQTNLVPYPRIHFMLSSYAPVVSAEKAYHEQLSVSEITNSAFEPANMMAKCDPRHGKYMACCLMYRGDVVPKDVNAAVATIKTKRTIQFVDWCPTGFKCGINYQPPTVVPGGDLAKVMRAVCMISNSTAIAEVFSRMDQKFDLMY…
PBANKA_0306800	A0A509AEV0	ATP-dependent RNA helicase UAP56, putative OS=Plasmodium berghei (strain Anka) OX=5823 GN=PBANKA_0306800 PE=4 SV=1	53	0	84597	22537	16784	22749	143340	122363	211248	61785	0	32878	202157	18753	0	63181	168719	3	0.454255	-0.175401	0.748316	-0.0754937	4	34	4	17	MAAIDHNVQDELVDYEDDDNMLDNKDVKCDIGGNLLNNNNKGVNESGAMRGSYATVHTGGFKDFFLKPELLRAISESGFEHPSEVQQETIPAAITGTDILCQAKSGMGKTAVFVLSILQQLETNDSKDIKEEKDMNNASGDMNQNSGSQNKYVRCLGIAHTRELAYQIKNEFDRFSKYLKNVRCEVVYGGISMNKHVVLFKGNNIPHIIIGTPGRILALIREKYMLTDKIQHFVLDECDKCLERLDMRGDVQKIFISTPLKKQVMFFSATMAKEMRDVCKKFLQNPVEIFIDDEAKLKLHGLLQHYVKLQEKDKTRKLIEILDALEFNQVIIFVKSVTRAITLDKLLTECNFPSISIHGGLNQEERIERYDKFKKFENRILVSTDLFGRGIDIERINIV…
PBANKA_0503600	A0A509AL02	60S ribosomal protein L30e, putative OS=Plasmodium berghei (strain Anka) OX=5823 GN=PBANKA_0503600 PE=3 SV=1	11.8	0	0	0	0	0	88857	20347	29415	0	0	0	41214	0	0	18054	34765	2	0.710766	-0.122892	0.804174	-0.080103	3	13	3	37	MAKKAKKSVGDNINSKLQLVMKSGKYQFGRKSCLKALRTGKGKLVIVSSNCPPIQRSVIEYYAMLSKCGVHDYHGDNNDLGTACGKLFRISCLVITDVGDSDIIKTNE
PBANKA_0522800	A0A509AGL9	40S ribosomal protein S19, putative OS=Plasmodium berghei (strain Anka) OX=5823 GN=PBANKA_0522800 PE=3 SV=1	20	0	12253	29079	144862	0	565046	199308	287489	78025	22407	57298	238785	0	10408	51485	355737	3	0.877881	0.0465459	0.809875	-0.0802949	7	66	7	37	MAEEFTDDIGVFSKKLLEPVPFVRTNNCIKDVDAELFISAYAKYLKLHNKITFPKWCNFVKTGKGRKLAPLDEDWYFIKASSILRRLYIHPDIGVGFLRRQFSYKQRRGVAPNHTSLASGKILRSILQQLENIGYVEQNPKKKGRRLTIKGENAINNFARYINKKVYKLEKQ
PBANKA_1019400	A0A509AJI0	60S ribosomal protein L7a OS=Plasmodium berghei (strain Anka) OX=5823 GN=PBANKA_1019400 PE=3 SV=1	33.3	0	0	0	0	0	144024	132266	111333	38037	0	0	207942	0	0	31363	162010	2	0.967718	-0.0110797	0.723082	-0.0885307	2	16	2	7	MAKDNKKQTKKPSKKTPAPCPLSNKKAVKKEIKKEKKNGIRMNPLIFERKRKTNIIGVGIRPKKDLSKYVKWPKHLRLQRKKKILLQRLKVPPAINQFNYTLSKNQTQDLMNFLKEYKPESKSEKKERLLKKAKDDLNKTQSKDKKPLMIKYGIKHITKLIERKNCSLVVIANDVTPIELVLFLPALCRMKDIPYCFVKNKSKLGKLVHKKMATAVCVQKVRKEDQDKLDYFCKLSREQFNDNADIRRKWGGQKMSKKSLILKKMKDKAKKLEEAKKKEISTKL
PBANKA_0711900	A0A509AK78	Heat shock protein 70 OS=Plasmodium berghei (strain Anka) OX=5823 GN=PBANKA_0711900 PE=3 SV=1	75.2	78317	2426692	444278	1690277	274940	2136864	2033202	2403899	950806	345901	669323	1296859	60770	324961	701757	1184653	4	0.952386	-0.0121032	0.714916	-0.0955268	56	1565	54	57	MANAKAKPNLPESNIAIGIDLGTTYSCVGVWRNENVDIIANDQGNRTTPSYVAFTDTERLIGDAAKNQVARNPENTVFDAKRLIGRKFTESSVQSDMKHWPFTVKSGIEEKPMIEVVYQGEKKLFHPEEISSMVLQKMKENAEAFLGKSIKNAVITVPAYFNDSQRQATKDAGTIAGLNVMRIINEPTAAAIAYGLHKKGKGEKNILIFDLGGGTFDVSLLTIEDGIFEVKATAGDTHLGGEDFDNRLVNFCVEDFKRKNRGKDLSKNSRALRRLRTQCERAKRTLSSSTQATIEIDSLFEGIDYSVTVSRARFEELCIDYFRDTLIPVEKVLKDAMMDKKSVHEVVLVGGSTRIPKIQTLIKEFFNGKEACRSINPDEAVAYGAAVQAAILSGDQSNA…
PBANKA_1338300	A0A509AQA3	60S ribosomal protein L6, putative OS=Plasmodium berghei (strain Anka) OX=5823 GN=PBANKA_1338300 PE=3 SV=1	21.6	0	0	0	25330	0	367853	105413	190342	111548	0	0	245187	0	0	22383	212462	2	0.603851	-0.21129	0.668927	-0.113026	4	37	4	26	MKTIVSSQKITIPEGVQVAINSRKVTVTGKHGTLKKSFRHLPIDIRLNKLKKYIKVVMWFGVPDRLACIRTVCTHLKNMFTGVTKKFLYKMRLVHAHFPINSNIVNDNKLIEIRNYLGEKRVRFVKALPGVLIEKSPSVKDEIYVSGADIENVSLTAALIHQSVLCRNKDIRKFLDGIYVSEVTTVEKDE
PBANKA_0604800	A0A509AGV6	Eukaryotic translation initiation factor 3 subunit C OS=Plasmodium berghei (strain Anka) OX=5823 GN=PBANKA_0604800 PE=3 SV=1	108.8	0	0	0	0	0	20912	0	81300	0	0	0	36406	0	0	12234	61903	2	0.712067	-0.124101	0.579148	-0.132216	2	8	2	2	MQSKFWARGADNDSGDNVSDSSENEVDEKPLVSAQAERWAVMDSSSSEEEERVIKSSEGKRLDFYENIEDNLNESMENDDFNQLLKEYENLYKFMVKEDSDRIPNFVIIYLDKLTKYVDTTFQNNVEKKNLSKNKAQTLNKLRAKIRKCSELYQNKLNQYLENPEKFKDDLGRRKKDEDEEDEEDEEDEEDEEDEEDEEKDKINKEDGDEEDDWSYSEDAEYASDEEDDKTKKAMSKWGLKTIEKVDSKKKVAKIKKSKKEGTKKKDDKGSHIDDNQSSKKKTYAELLNTKNLSEDVIRNRVKSVIEKRGRKGLDKHEHINILSKLCEIAKTISTQSYIEVLEHLINLEFDVVSSVYTYMSFNIWNKTFKYIELILDLLIQNEHFYLVSINITEEIAEV…
PBANKA_0619100	A0A509AI21	40S ribosomal protein S5, putative OS=Plasmodium berghei (strain Anka) OX=5823 GN=PBANKA_0619100 PE=3 SV=1	21.7	0	21178	0	29988	0	175138	66740	86098	43031	0	0	101577	0	0	27247	113459	2	0.217848	-0.304036	0.601525	-0.132874	4	20	4	25	MEATSDIKLFKKWSYEDVNIADLSLVDCIAVSQKACVYTPHTAGRYQKKRFRKALCPIVERLVNSMMMHGRNNGKKLKAIRIVAYAFEIIHLMTGENPIQVFVNAVQKGGPREDSTRIGSAGVVRRQAVDVSPLRRVNQAIYLICTGARNAAFRNIKSISECLAEEIIHCANESSSSYAIKKKDEIERVAKANR
PBANKA_1133300	A0A077XDU3	Elongation factor 1-alpha OS=Plasmodium berghei (strain Anka) OX=5823 GN=PBANKA_1133300 PE=3 SV=1	48.9	131065	2989221	1873421	3281338	556761	4409111	4783865	5016632	1795022	463164	1465563	3263459	264218	345044	1024652	1346125	4	0.914006	-0.0173738	0.51399	-0.142668	38	1104	38	80	MGKEKTHINLVVIGHVDSGKSTTTGHIIYKLGGIDRRTIEKFEKESAEMGKGSFKYAWVLDKLKAERERGITIDIALWKFETPRYFFTVIDAPGHKDFIKNMITGTSQADVALLVVPAEVGGFEGAFSKEGQTKEHALLAFTLGVKQIVVGVNKMDTVKYSEDRYEEIKKEVKDYLKKVGYQADKVDFIPISGFEGDNLIEKSDKTPWYKGRTLIEALDTMEPPKRPYDKPLRIPLQGVYKIGGIGTVPVGRVETGILKAGMVLNFAPSAVVSECKSVEMHKEVLEEARPGDNIGFNVKNVSVKEIKRGYVASDTKNEPAKGCSKFTAQVIILNHPGEIKNGYTPVLDCHTSHISCKFLNIDSKIDKRSGKVVEENPKAIKSGDSALVTLEPKKPMVVE…
PBANKA_0108800	A0A509ABX5	Histone H3 OS=Plasmodium berghei (strain Anka) OX=5823 GN=PBANKA_0108800 PE=3 SV=1	15.4	52438	197363	0	154648	15181	526458	142851	653707	296042	23295	118530	1453436	91731	0	92305	358434	3	0.430038	0.3281	0.753419	-0.157246	4	35	4	27	MARTKQTARKSTAGKAPRKQLASKAARKSAPISAGIKKPHRYRPGTVALREIRRYQKSTDLLIRKLPFQRLVREIAQDYKTDLRFQSSAVMALQEAAEAYLVGLFEDTNLCAIHAKRVTIMPKDIQLARRIRGERS
PBANKA_1318400	A0A509APU2	6-phosphogluconate dehydrogenase, decarboxylating OS=Plasmodium berghei (strain Anka) OX=5823 GN=PBANKA_1318400 PE=3 SV=1	53.3	0	100452	31951	64454	0	285840	279305	315936	27617	0	58432	243120	0	0	81122	181545	2	0.162143	-0.448852	0.506752	-0.189462	8	50	8	21	MTDGCDIGLIGLAVMGQNLSMNIASNGFKIGVYNRTYERTTETLKRAKEENLVIYGYKTLEELINNLKKPRKIILLIKAGPAVDENINNILKYYEKGDIIIDGGNEWYLNSEKRIKICAEKNVEYLAMGVSGGEAGARYGCSFMPGGSKYAYEHVEEILKKCSAKVNTSPCVTYIGPGSSGNYVKMVHNGIEYGDMQLISESYFIMKHILKYDNKKLAGVFKKWNEGILNSYLIEITSKILDKKDNLTDNYLVDVILDIAGAKGTGKWTMLESIERGIPCPTICAALDARNLSAYKELRINANNNFSNEIKINNTNEDLTNFENDLLNALYCCKIISYTQGLFLLKQVSKEMNWNLNLGEISRIWRGGCIIRAIFLDRITNAYKNNNALELLFMDKEFS…
PBANKA_1215600	A0A509AQP3	40S ribosomal protein S3a OS=Plasmodium berghei (strain Anka) OX=5823 GN=PBANKA_1215600 PE=3 SV=1	30	0	23130	0	0	0	254318	73383	165081	113465	16768	0	284896	17281	0	0	247388	2	0.406517	0.255845	0.621471	-0.193688	6	37	6	19	MAVGKNKRTSKGKKGGKKKVTDVFTKKEWYDLNAPKMFMVRKFGKTLVTKTIGKKLATDGLKGRIYEVNLADLNNDEDQAHKKIKLICDHIINRDCYTDFCGLSITRDKLCSLIRKGYTLIEGCTDVKTIDNYHLRMFCIAFTKKRPNQTKTTCYAQTSQIKKIRKKMVDIMHAEASKVLLKDLVKKIIPESIGKEVEKQCKKIFPLQNVLIRKVKILKRPKLDISKLMELHSDPKEDSGKNVKSLPESKEATNILTAELKH
PBANKA_0918000	Q8MZJ7	60S acidic ribosomal protein P0 OS=Plasmodium berghei (strain Anka) OX=5823 GN=PBANKA_0918000 PE=3 SV=1	34.8	0	0	43704	117749	21239	482127	355506	513074	81665	0	110679	493135	0	0	206230	357032	2	0.712887	-0.143242	0.608781	-0.224234	10	73	10	37	MAKLSKAQKKQIYMDKLSSLIQQYNKILIVHVDNVGSDQMASVRQSLRGKATILMGKNTRIRTALKKNLQAVPQIEKLLPLVKLNMGFVFCKDDLSEVRNIILQNKSPAPARLGVIAPIDVFIPPGPTGMDPSHTSFFQSLGISTKIVKGQIEIQENVHLIKQGEKVSASSATLLQKFNMKPFSYGVDVRTVYDDGVIYDAKVLDITEEDILEKFSKGVANVAALSRSVGIITEASYPHVFVEAFKNIVSLVIDTDYTFPLMKKIKDMVENPQAYAAAPVAASSAQKDEPEKEAAKKEEEEEEEEDGFMGFGMFD
PBANKA_1137900	A0A509APL9	Proliferating cell nuclear antigen OS=Plasmodium berghei (strain Anka) OX=5823 GN=PBANKA_1137900 PE=3 SV=1	30.7	0	43739	68757	206341	14238	129108	129070	406580	23643	25264	153238	768698	0	0	115954	235819	2	0.617986	0.193283	0.477703	-0.232295	6	65	6	34	MLEAKLNNAYILKKLFECIKDLVNDANIDADENGLKLQALDGNHVSLVSLHLVDSGFSHYRCDRERVLGVNIASLNKVFKLCGINESVVISSKDDEDNLNFVFENNKEDKVTNFSLKLMSIELDSLNIPDCDEGFDAEVELSSKELTNIFRNLSEFSDTVFIEIDSNSIKFTTKGLVGDAEVALKPRESTSEDDVGVTIKSKKKIKQSFAIKYLNLFSKSSILSDVVILGLSDSRPIEFKYEIKDTSPDSDALKVGFIKFFLAPKMDDDMDNKD
PBANKA_1118600	A0A509AKL5	Cell division cycle protein 48 homologue, putative OS=Plasmodium berghei (strain Anka) OX=5823 GN=PBANKA_1118600 PE=4 SV=1	90.8	0	107904	18359	73328	0	0	99038	61067	0	0	14223	187776	0	0	22031	91567	2	0.517826	-0.259974	0.530996	-0.244218	11	50	10	21	MENNPDIKTLGDDNNGKIPKKKNLCRLIVEEATNDDNSVVALNTKRMEELNFFRGDTILIKGKKRHSTICIILNDNDLDEGKIRINKVARKNLRVCLGDIVYVKACPEIPYGKKIQVLPIDDTIEGLAKDTLFEIFLKPYFNESYRPVKKGDLFLVRGGFMSVEFKVVEVDPDDFCIVSPDTVIYYEGDPIKRDDEEKLDEIGYDDIGGCKKQLAQIREMIELPLRHPGLFKTLGVKPPRGVLLYGPPGSGKTCIARAVANETGAFFFLINGPEVMSKMAGEAEANLRRAFEEAEKNSPAIIFIDEIDSIAPKREKTNGEVERRVVSQLLTLMDGIKSRGQVVVIAATNRQNSIDPALRRFGRFDREIDIGVPDDNGRFEILRIHTKNMKLSPDVKLEE…
PBANKA_0922100	A0A509ALQ7	40S ribosomal protein S18, putative OS=Plasmodium berghei (strain Anka) OX=5823 GN=PBANKA_0922100 PE=3 SV=1	17.9	0	29656	0	38747	0	299025	93894	90734	68174	0	27797	106915	0	0	18542	176477	2	0.448184	-0.200113	0.314292	-0.250466	5	34	5	48	MSLQVIDQNDFHHILRILNTNVDGKEKVTIALTAIKGIGKRIANVICKQANVDPTKRAGELTTEEINNIVHIMSSPSQFKIPDWFLNRRRDIKDGKNLHVIANQLDSYLREDLERMKKIRLHRGLRHHWGLRVRGQHTKTTGRRGRTVGVAKKKGA
PBANKA_0712600	A0A509AIM7	14-3-3 protein OS=Plasmodium berghei (strain Anka) OX=5823 GN=PBANKA_0712600 PE=3 SV=1	30.2	0	705660	486389	695768	45769	825673	932510	1075765	269907	86256	250675	951192	23872	37157	261132	568253	4	0.814339	0.106649	0.583571	-0.26352	11	125	11	50	MATPEELKQLRSDCTYRSKLAEQAERYDEMADAMRTLVEQCVNNDKDELTVEERNLLSVAYKNAVGARRASWRIISSVEQKEMSKANVHNKNVAATYRKKVEEELNSICQDILNLLTKKLIPNTSESESKVFYYKMKGDYYRYISEFSCDEGKKEASNFAQEAYQKATDIAENELPSTHPIRLGLALNYSVFFYEILNQPHQACEMAKRAFDDAITEFDNVSEDSYKDSTLIMQLLRDNLTLWTSDLQGDQTEEKSKDEGLE
PBANKA_0203000	A0A509ADC9	Chromatin assembly factor 1 protein WD40 domain, putative OS=Plasmodium berghei (strain Anka) OX=5823 GN=PBANKA_0203000 PE=4 SV=1	50.5	29859	259167	127565	424313	53213	297430	355878	674399	32600	101391	339700	1020330	0	27003	274179	397353	3	0.991024	0.0040434	0.230898	-0.335686	13	166	13	34	MNALKECKKRKSNALDEACLELSEEPTNEEIMKEEVENVETQFANWKTNSGLLYDFVCRKELEWPSLSMDFGDYSDENIKDNVLNQIVCVGTHTSNNEPNYLYVCDVLFPLEQLPQDKCVYKINESYEGFDFCPEKNKITIKSKIYHEGEVNRIRFLPLEKKHIVVTKAIDGNLHLFDINKHSIDDTTNSDSRKMSPEISFIGNNSDGFGLEFNSLKKYALTCGNDGSINVYDYNDLSAKSLNPFYSVKYKSPINDVSPTNDPNLILACADDGYILMYDLRIKTTEPAQQVLGQQVPVNAISLNTFTGHFASGSDNGKIKVWDIKKFNEPAHIINAHKEAIIRLNFSPNDSSILASASNNRFINVYDLNKIGEELDAIDLSDGPSELIFSHGGHTQPIT…
PBANKA_1459300	Q4Z1L3	Actin-1 OS=Plasmodium berghei (strain Anka) OX=5823 GN=ACT1 PE=1 SV=2	41.9	27752	278185	76827	564520	34447	414661	608421	581700	142227	30716	124461	570268	57232	22107	112287	200761	4	0.0982336	-0.275814	0.148619	-0.341459	16	212	14	51	MGDEEVQALVIDNGSGNVKAGVAGDDAPRSVFPSIVGRPKNPGIMVGMEEKDAFVGDEAQTKRGILTLKYPIEHGIVTNWDDMEKIWHHTFYNELRAAPEEHPVLLTEAPLNPKGNRERMTQIMFESFNVPAMYVAIQAVLSLYSSGRTTGIVLDSGDGVSHTVPIYEGYALPHAIMRLDLAGRDLTEYLMKILHERGYGFSTSAEKEIVRDIKEKLCYIALNFDEEMKTSEQSSDIEKSYELPDGNIITVGNERFRCPEALFQPSFLGKEAAGIHTTTFNSIKKCDVDIRKDLYGNIVLSGGTTMYEGIGERLTRDITTLAPSTMKIKVVAPPERKYSVWIGGSILSSLSTFQQMWITKEEYDESGPSIVHRKCF
PBANKA_1116800	A0A509APE5	Nuclear segregation protein OS=Plasmodium berghei (strain Anka) OX=5823 GN=PBANKA_1116800 PE=4 SV=1	53.3	0	0	0	37590	0	124138	98934	193083	0	0	34359	59889	0	0	27803	45173	2	0.280213	-0.32347	0.207858	-0.361105	2	12	2	5	MTEAENSKIEKPNFDAYNEKLGSISEAIDQIKKKIDNLQKEIKIANKGKEEYNKKKKDIVTKIDSFQNEIDKLENERRGILDDIEQKQKHKKELRVNAQNIKKQIGFENEEDIEKKIREIENKLMTSTISIKEEKLLINQIQALNKNIPLFSSYSKIENEANKYDDEAIVPLKSKMDEIREKINKLRNEKKNERNKLKELQNSYQERNNKLNELNNLRDNYSKKMNHYFMERRSITVEMEEKKQQYRSYKINLLQAKQQKLKEERERKNLEFEKQNLEKELEDIDALPYREELALIENMLAYLKKLQDEAKMEETKKQQNLSNKKVNGEVEKTNENDMEEENNKAKNENKKGKNKKDKHKIFKLDMNILCYFVTAGITPPVSFDEIDSCISKLYEKKDM…
PBANKA_1423300	A0A509AU86	DNA/RNA-binding protein Alba 1, putative OS=Plasmodium berghei (strain Anka) OX=5823 GN=PBANKA_1423300 PE=4 SV=1	26.9	41638	0	28879	85055	94400	405283	158151	297833	280916	36008	82887	522220	20477	23706	0	472259	3	0.486775	0.285126	0.444914	-0.40047	7	56	7	31	MKKDREPIDEDEMRITSTGRMTNYVNYGAKILGEEDKKSLKIKATGNAIGKAVTLAEIIKRRFKGLHQITKCGSTVIADQYVSGQDNSEHVIQEKTVSFIDILLSRDQLDVKDAGYQPPLDEKYVKEMSPEEIVNSRPFRGRSFRPRFFRGFRGGGRGGFMRRGGYKFFGDRMYDSRNGFRDGRGYGGSFGRGGGFRSGGGMGGNGRGGFRGFRDGRDGDYRSSRGGFRGGRNGFRGGRALS
PBANKA_1234800	A0A509AQX0	40S ribosomal protein S9, putative OS=Plasmodium berghei (strain Anka) OX=5823 GN=PBANKA_1234800 PE=3 SV=1	22.1	0	0	0	0	0	190670	0	0	32675	0	0	48102	0	0	8078	31797	2	0.832141	-0.0587023	0.204021	-0.404217	5	12	5	26	MPKSYRNYSKTARNPKRPFEKERLDQELKLIGEYGLKNKREIWRVQYLLAKIRSAARYLLTLDEKSPKRIFQGEALLRRMVRQGLLGENEEKLDYVLGLTLPKLLERRLQTKVFKLGLAKSVHHARVLIRQRHIRVGKQMVDIPSFLVRIDSEKHIDFATASPFGGSRPGRVKRRTLRNQKEKADGDDN
PBANKA_1238800	A0A509ANR0	Karyopherin beta, putative OS=Plasmodium berghei (strain Anka) OX=5823 GN=PBANKA_1238800 PE=4 SV=1	127.7	0	126699	26352	0	0	129391	266985	272052	16573	0	0	59059	0	0	30535	27105	2	0.0420575	-0.892799	0.389772	-0.441854	16	90	16	22	MEKIVEIIEGLSNPDSRIRTECENTLNYYKKNDLNNTVLSILKLLKSHKNSQVRLQCAILVRNLFRGYIKSSTGDIMDKDKTDDNSLLNGEEENYWDLLSNNLKNIVKSELISNIGIETDKMVRSNLCSNIIDLSSKLLLNNEWPELLSVTFEFCNSNNNNDVLISGYKILGGILNCISDELHGKNEMISSICMKGLNSPSVQVRSECINLISCIVEDNNSPLIKCVQPCIPLILQSLSLMVKNSVSDVAVLDECEKVLQSIGKMIDYNAKFFSKYISNLCDILFDICMKNENELNYDFDNSLKSLSIEALITIPERRPKTALSVPHFLEKIINVSLLFMLDINNDCFNEWMNSLKESKDENQELYDIGEESLDRVGKAYSELSDGPEFIHILYNKVSE…
PBANKA_1331900	A0A509AS99	RNA helicase OS=Plasmodium berghei (strain Anka) OX=5823 GN=PBANKA_1331900 PE=3 SV=1	45.3	0	356591	195134	479694	0	910973	704776	788912	247220	0	244026	719268	0	14791	176022	488610	3	0.814786	-0.127457	0.377988	-0.456322	12	112	12	34	MSTKDEKFNNENDIEGNTEEIVDTFDALGLNEKLLRGIYSYGFEKPSAIQQRGIKPILKGYDTIGQAQSGTGKTATFVISSLQLINYDYVACQALILAPTRELAQQIQKVVLALGDYLKVKCHACVGGTVVREDIDKLKQGVHMVVGTPGRVYDMIDKRHLGVDRLKLFILDEADEMLSRGFKAQIYEVFKKLVPDIQVALFSATMPQEILELTTRFMRDPKTILVKKDELTLEGIRQFYVAVEKEEWKLDTLCDLYETLTITQSIIYCNTRKKVDILTQEMHNRLFTVSCMHGDMDQKDRDLIMREFRSGSTRVLVTTDLLARGIDVQQVSLVINYDLPCSPDTYIHRIGRSGRFGRKGVAINFVTNDDKEKDKLKKIESYYSTQIEEMPLEVADYL
PBANKA_0604300	A0A509AJD4	Tetratricopeptide repeat protein, putative OS=Plasmodium berghei (strain Anka) OX=5823 GN=PBANKA_0604300 PE=3 SV=1	38.8	0	153342	0	286102	31698	151377	156409	211800	29017	87135	139044	570480	0	0	116119	364433	2	0.42008	0.307421	0.262177	-0.461441	16	88	16	50	MTEEEMIVETGSNTESEFDEQAELLEKKTAQELFDMGNLEFKESKNYDVAAERFSMAVEKKVKELNVEDSLHPDLREYYLCFADALLTKEEEKNDLFEFLKKKKSVEATEDEDCSNKEEVTDEQLAFEMFEFSRKCYEMLLEQKKELSQKDLLNYSYVFIRLGDISLLNHFFEEALKEYEKCVNLREEHKLGDENLIAPLISLSQSYMFCGKRKEAVEYFEKVKKILLDVRQKTTPLPKNTNEKIIRDTYEDVQIQINDLKRQIEEEGEEGKEKGSQTIAKELVITTKSEFDKAVLNKDINEVKKIKISNIEADEHANKKRRINLSNYKN
PBANKA_0930300	A0A509AIJ0	GTP-binding nuclear protein OS=Plasmodium berghei (strain Anka) OX=5823 GN=PBANKA_0930300 PE=3 SV=1	24.9	0	149338	89807	163776	34554	299692	303416	227702	152901	35169	65761	0	0	0	68811	339247	2	0.332706	-0.435187	0.106387	-0.531203	12	74	12	60	MDNQEFIPQYKLILVGDGGVGKTTFVKRHLTGEFEKKYIPTLGVEVHPLKFQTNFGKTQFNVWDTAGQEKFGGLRDGYYIKSDCAIIMFDVSSRITYKNVPNWYRDITRVCETIPMVLVGNKVDVKDRQVKSRQIQFHRKRNLQYYDLSARSNYNFEKPFLWLARRLSNQPNLVFVGEHAKAPEFQIDLNIVREAEKELEQAAAVAIDEEDIEN
PBANKA_1424300	A0A509AU99	Nucleoplasmin-like domain-containing protein OS=Plasmodium berghei (strain Anka) OX=5823 GN=PBANKA_1424300 PE=4 SV=1	32.6	0	27322	0	96767	0	50030	61388	162567	104918	0	22431	140535	0	0	16339	35638	2	0.731468	0.0871252	0.0863397	-0.54086	3	17	3	10	MFYGKVIKSEETVIPEPKDGYSVIHLSRACLNNPQDDGKLYVQVEDANGCYNICCLQKNVCEDTPLDIFLMLDNEVKIKTSGTTDEVHVVGYYEVSFGQDNLDEDEDEFDEDDEYENEAARILTKKNTLKNSSAFRLKNKKNEDGEEDEEDEDDEDDEEDEDDDEDEEDEDDEDDEDDEEDEDNEEDEDDEEDDEEGDKKKKKGNNKRSLDGNGSGPSKKSKLDDEEQYEKNLIEFIKKNGKTTLTELGKVKKPAGLKMKLGFFVKKRPSIFKLDNDSQIVSLK
PBANKA_1033900	A0A509AK63	40S ribosomal protein S8 OS=Plasmodium berghei (strain Anka) OX=5823 GN=PBANKA_1033900 PE=3 SV=1	25	0	14825	0	32300	0	174514	59466	83711	28064	0	0	141406	0	0	22394	73525	2	0.0507987	-0.428338	0.0133051	-0.550326	4	32	4	25	MGISRDGRHKLRLTGGKKKIHKKKRKYELGRPPSNTKLGSRQVHVVRGRGRNYKYRAIKLDSGSFSWPAFGISKMTRIIDVVYNASNNELVRTKTLVKNCIVLIDSHPFTAWYENTFGVTLGKKKKSKEEGKDEENNEEQKEENNEGKDEKDKKSYSVIKKIGKAKQIDPALLEQFKQGRVLACISSRPGQCGKADGYIIEGDELLFYKRKMDKKKRN
PBANKA_0407600	A0A509AD56	Asparagine synthetase [glutamine-hydrolyzing] OS=Plasmodium berghei (strain Anka) OX=5823 GN=PBANKA_0407600 PE=4 SV=1	66.3	0	59876	0	72023	0	69858	150198	189727	26628	0	22186	64649	0	0	17358	45410	2	0.0463955	-0.572986	0.067253	-0.58497	4	21	4	6	MCGILAIFHSSIETNRLRRKALRLSKILRHRGPDWNGIVVEENGDGTTNVLTHERLSIVDVLSGQQPLYDDKKEICLTINGEIYNHLELRKLVKQDILDALKSKSDCAIIPNLYKIYKEKLPCMLDGIFAGVISDKKYNTFFAFRDPIGICPLYIGYAADGSIWFASEFKALRIYCVRYVAFPPGHYYMCNNGKGEFVRYYNPNWWKLNSPIPNNKIDLEKIRITLENAVIKRLMGDVPFGVLLSGGLDSSIIASIISRHLKSIQTGTINNINGACVGKNNKNLNALKSFSIGLKDSPDLKAAKEVSDFLNTDHTEFHFTVDQGIDTLHDVIYHIETYDITTIRASTPMYILSRLIKSSCIKMVLSGEGSDEIFGGYLYFHKAPNAEEFHRELQRKIHD…
PBANKA_1016700	A0A509AKQ5	Leucine-rich repeat protein OS=Plasmodium berghei (strain Anka) OX=5823 GN=PBANKA_1016700 PE=3 SV=1	32.7	0	96652	131190	316641	0	119829	148651	464117	72879	42503	127118	697074	0	0	23521	138516	2	0.3109	0.438968	0.185574	-0.585736	5	41	5	22	MEKAINERIEKWKKENTTDNKEVKNENAYESITELILDGKKFNTIKSEDIELLKNFKNLERLCLNQTGIQNLGSIPTMESLTVLELTDNHLSTVDILKHITTSFPNLKTLEIGGNHFKNIKDFETLKDLKQLTRLGVQFNPFSDDSNYRKELFEVLPNVKIIDCYNKDGVEVLSSDEEDEEEEYEEEDNTLKNFYEADFKEEDDEDEEFVPNDNEDEEDDELDDDLEEEEIDELNKEEDFDGETKDSENDPKEEKNNKRKQDSLENNDNEIDTKKTKVE
PBANKA_0405200	A0A509AFC2	CCT-beta OS=Plasmodium berghei (strain Anka) OX=5823 GN=PBANKA_0405200 PE=3 SV=1	59.1	0	100284	37429	113156	0	254126	269959	288441	48852	0	30421	177989	0	0	55840	112482	2	0.00534512	-0.544742	0.00561001	-0.604895	12	64	12	30	MMNTIVPEVLKQGAQEDKGEIARLQGFVGAIAVGDLVKSTLGPRGLDKILTPLNLEGSRNHQHTVTNDGATILKSVWLDNPVSKILVDVSMQQDNKCGDGTTGVVVLAAEMLRNAEILVENKIHPQIICDGFRMALEAARKSLKESCFCHDMHSDVFREDLLRIARTTLSSKLLTHEKNHFAELAVNAIMRIKDNLNLDLIHIIKKSGGTIKESYLEDGFILEKKIGINQPKSLTNCNVMIANTPMDTDKVKIYGTKVNVHSFEDIQDLENEEKIKMKKKVESIISHGCNVFINRQLIYNYPEQIFREHNVMTIEHSDFDGMERLANCLGAEIASTFEEGLNIKLGHCEKIEEIMIGEDKLIRFSGCKKNGACTIILRGASSHILEESERSLHDALAVL…
PBANKA_0703900	A0A509AJK0	Receptor for activated c kinase, putative OS=Plasmodium berghei (strain Anka) OX=5823 GN=PBANKA_0703900 PE=3 SV=1	35.6	14947	24600	37109	117001	18087	180000	157203	159592	64888	16094	61203	189351	0	0	37111	92628	2	0.48394	-0.114177	0.000912873	-0.646975	5	39	5	25	MDNIKEAQVILKGVLEGGHSDWVTSVSTPTDAKLKTVVSASRDKKLIVWNINPDDESGEIGTAKKSLTGHSQAISDVSISSDGLFALSGSWDNSIRLWDLSLGETIRSFIGHTSDVFSVSFSPDNRQIVSASRDKTIKLWNTLAQCKYTITEQQHTDWITCVRFSPSPKQAIIVSCGWDKLVKVWNLKNCDLNKNLEAHTGVLNTVTISPDGSLCASGGKDGVAKLWDVNEGKHLYSLETGCTINSLCFSPCDYWLCAATDRFIRIWNLESKLIIAEIYPVKQYKVGLPWCTSITWSANGQFLFCGSTDGNVYVYEIKKQAI
PBANKA_0610900	A0A509AH17	HSP40, subfamily A, putative OS=Plasmodium berghei (strain Anka) OX=5823 GN=PBANKA_0610900 PE=4 SV=1	48.4	0	96285	0	29845	0	310020	251967	395089	34736	0	0	137935	0	0	33820	136604	2	0.0666148	-0.608716	0.0550327	-0.693691	11	60	11	30	MFFSSGFPFDSMGGQQPRRKREVNNSKYYESLNLKKNCTIDEIKKAYRKLAIIHHPDKGGDPEKFKEISRAYEVLSDEEKRKLYDEYGEEGLEGGEQPTDATDLFDFILNAGKGKKKRGEDIVSEVKVTLEQLYNGATKKLAISKDVICTNCEGHGGPKDAKVDCKQCNGRGTKTYMRYHSSVLHQTEVTCNGCRGKGKIFNEKDKCVNCKGLCVLKTRKIIEVYIPKGAPNKHKIIFNGEADEKPNVITGNLVVILNEKPHTTFKREGVDLFMSYKISLYESLTGFIAEITHLDERKILIDCTNAGLIKHGDIREVLEEGMPTYKDPFKKGNLYITFEVEYPMDLVITKEKKEMLKILKKQNEVEKKYDIENTDCEVVTCKLVDKEYLKQRLTMQQQQ…
PBANKA_1122900	A0A509AM85	Phosphotransferase OS=Plasmodium berghei (strain Anka) OX=5823 GN=PBANKA_1122900 PE=3 SV=1	55.4	0	147079	44301	124095	14508	123648	188284	230710	0	16621	53613	160877	0	0	28316	64583	2	0.104722	-0.409748	0.0193497	-0.717437	11	55	11	27	MSEYNLKKDDDSPFYKLDTIKCEVPINSEFNDRINKFVNQLRISYGTLEEFVDNFVYELKKGLEAHRRHPNLWIPHECSFKMLDSCISDIPTGQERGTYYAIDFGGTNFRAVRASLDGNGKIKRDQETYSLKFTGTFSHEKGLLDKHATASQLFDHFAERIKYIMGEFNDLDDNNEKSVGFTFSFPCTSPSINCSILIDWTKGFETGRATNDPVEGRDVCKLMNDAFVRSNVPAKVSCVVNDAVGTLMSCAYQKGKSAPPCYIGIILGTGSNGCYYEPDWKKYKYSGKIINIELGNFDKDLPLSPIDLVMDWYSANRSRQLFEKMISGAYLGEIVRRFMVNVLQSASSKKMWQSDSFNSESGSVVLNDTTPDFSECKKIAKQTWDMDFTDEQIYALRKI…
PBANKA_0603200	A0A509AGU2	Eukaryotic translation initiation factor 5A OS=Plasmodium berghei (strain Anka) OX=5823 GN=PBANKA_0603200 PE=3 SV=1	17.5	14624	18473	46006	140203	13332	318664	144075	195944	71395	20368	77802	192127	0	0	27231	113563	2	0.863956	-0.0354827	0.00793089	-0.765193	4	57	4	34	MSDHETYDNIDAGASQTYPVQAGAIKKNGHVMLKEHPCKVVDYSTSKTGKHGHAKAHIVGIDIFTGKKYEDICPTSHNMDVPVVKRTELQLIDITEDGFVSLLFDNGDTKDDLSLPKDSEGNFDDVAKQIRNLFDSGKSVLVSVLSACGQEKIIAAKEMSS
PBANKA_1444000	A0A509AVQ1	Macrophage migration inhibitory factor OS=Plasmodium berghei (strain Anka) OX=5823 GN=PBANKA_1444000 PE=3 SV=1	12.9	0	0	109596	124348	0	433764	247228	161993	0	0	56953	181804	0	0	16817	89305	2	0.440708	-0.320594	0.0758935	-0.770131	5	32	5	38	MPCCELITNISIPDDKAQNTLSEIEDAISNILGKPVAYIMSNYDYQKNLRFSGSNEGYCFVRLTSIGGINRSNNSLLADKITKILSNHLSVKPRRVYIEFRDCSAQNFAFSGSLFG
PBANKA_1326400	A0A509AQ04	Glyceraldehyde-3-phosphate dehydrogenase OS=Plasmodium berghei (strain Anka) OX=5823 GN=PBANKA_1326400 PE=3 SV=1	36.6	245242	2224802	1159346	2649011	264258	1683823	3065321	2501933	1007687	297479	878160	3307814	107479	85005	285291	1107474	4	0.79638	-0.0946112	0.057262	-0.782005	24	431	24	73	MAITKVGINGFGRIGRLVFRSAQERSDIEVVAINDPFMDISHLIYLLKHDSVHGKFPCEVTPTEGGIMVGNKKVVVYNERDPAQIPWGKHAIDVVCESTGVFLTKELSNAHIKGGAKKVIMSAPPKDDTPIYVMGINHEKYNSSQTIVSNASCTTNCLAPIAKVIHENFGIVEGLMTTVHASTANQLVVDGPSKGGKDWRAGRSALLNIIPASTGAAKAVGKVLPELNGKLTGVAFRVPIGTVSVVDLVCRLEKPAKYEDVAKKIKEASEGPLKGILGYTEEEVVSQDFVHDSRSSIFDLKAGLALNDNFFKIVSWYDNEWGYSNRLLDLAIHITKN
PBANKA_1141700	A0A509AL81	Ubiquitin-60S ribosomal protein L40, putative OS=Plasmodium berghei (strain Anka) OX=5823 GN=PBANKA_1141700 PE=3 SV=1	14.6	37149	103244	127288	431880	0	650487	525320	705356	134356	23544	116751	446746	0	0	50796	389244	2	0.23565	-0.347765	0.0147814	-0.902435	4	88	1	37	MQIFVKTLTGKTITLDVEPSDTIENVKAKIQDKEGIPPDQQRLIFAGKQLEDGRTLSDYNIQKESTLHLVLRLRGGAIEPSLAQLAQKYNCQKLICRKCYARLHPRATNCRNKKCGRTNQLRPKKKLK
PBANKA_1340400	A0A509AR16	L-lactate dehydrogenase OS=Plasmodium berghei (strain Anka) OX=5823 GN=PBANKA_1340400 PE=3 SV=1	36.9	0	175938	42658	209689	30429	315853	358177	486906	31028	0	65258	477171	0	0	27946	294856	2	0.0578591	-0.614906	0.00754594	-0.902666	6	69	6	26	MISVKHPKISILGASDIGCTLAHMICEKNLGDVVLHDFRKDLSKGRALDILHTRPINRSKINILGTSDITDIKDSLVVVVTIEVSEREFAEFDEEDIEKQVYTSNVKLLKDVSKAIKKHCPHAFVVVTTNPVDCMAKVLQDYANIPSHKICGMAGVLHSARLRHNLAEKLRVNPGDVQGFVIGAHGDKMVPLPRYCCVNGIPLCDFTKKGAITEKEISKIVEKTKNTSLELLDLMPEGSVCFAPSSAIVEIIEAYLKDLKRVLVCSIHLNGQYGHKGVFAGVPVVIGGKGIEKVIELDLNTQEKELFDDSLKHISYLFDNYKHESAIEEEPKPN
PBANKA_1219300	A0A509AQB3	Heat shock protein 110, putative OS=Plasmodium berghei (strain Anka) OX=5823 GN=PBANKA_1219300 PE=4 SV=1	94.8	0	302832	134441	239621	0	117713	415475	276220	0	0	44520	185164	0	0	33216	108370	2	0.0517063	-0.914781	0.0390113	-0.946078	19	106	19	25	MSVLGIDIGNENSVVATINKGAINIVRNDISERLTPTLIGFTEKERLIGDNALAKVKSNFRNTCRNIKNVLGKIGTGLEKDDLEVNEAYGDLVGCEHGYLGYSVEYKKEKENISAVRIIATLLLYLIRLGEKYIGKECNEIVLSYPPHYTNNQIQCLAAAAKIINVNVLRLISDNTAVALDYGMYRMKEFNEKNGSIVAFVNIGYANTYICIAKFYSNKCEILCDIADNTLGGRNIDNELIKYINNLFINTYKINALYKNGPIELSEMGNGKLDKFFTSKNNETAQINNKVRVKLQDVAIKTKKVLSANNETSIHVECLHEDLDCQGTINRETYEELCSNFFLTKLKNILDKAISISKINDVKNAQSVEILGGTTRIPFIQNFLQSYFNKPLSKTLVAD…
PBANKA_1314800	A0A509AQB1	Elongation factor 2, putative OS=Plasmodium berghei (strain Anka) OX=5823 GN=PBANKA_1314800 PE=3 SV=1	93.3	0	576720	340289	721845	157012	650148	1033021	1356076	321504	0	313170	570048	0	0	300185	478160	2	0.171421	-0.67932	0.0459837	-1.01115	30	289	29	42	MVNFTVDQVREIMNKTKQIRNMSVIAHVDHGKSTLTDSLVSKAGIISSKHAGDARFTDTRADEQERCITIKSTGISMYFEHDLEDGEGKKPFLINLIDSPGHVDFSSEVTAALRVTDGALVVVDTIEGVCVQTETVLYQALGERIKPVLHVNKVDRALLELQMEVEDIYQTFARTIESVNVIISTYTDKLMGDIQVYPEKGTVSFGSGLQGWAFTLETFSRIYSKKFGIEKSKMMQRLWGNSFYDAKTKKWSKNQQEGYKRGFCQFIMEPILNLCQSIMNDDKEKYTKMLQNIGVELKGDDKLLTGKQLLKKAMQLWLPAGDTLLEMIVTHLPSPATAQKYRVENLYEGPMDDEAANAIRNCDPNGPLMMYISKMVPTSDKGRFYAFGRVFSGTVATGQ…
PBANKA_0602700	A0A509ALS0	Nucleosome assembly protein, putative OS=Plasmodium berghei (strain Anka) OX=5823 GN=PBANKA_0602700 PE=3 SV=1	40.3	0	193063	0	100369	26005	271121	264434	269385	53346	0	38688	95468	0	0	30617	86708	2	0.0243466	-0.737977	0.00142428	-1.03387	3	19	3	9	MATNENNQPIPPEEEKEISSLLESIKIDDEKMSDLTEEQKETLKKLKLYQKEYYDYESKFEYELFLLRQKYHDLYGPIYDKRREALVGSGEAKIGTPNLPEFWLRALRNNNTVSHVIEDHDEEILVYLNDIRCDYIKKNKEKKEGFILSFHFVKNPFFSNSVLTKTYHMKCVDCDNEPVLLHTEATVIDWYENKNILKKNVVKKQHNKNSREVKTVQQTVNRDSFFHFFTSHKVPNSNVIKQLSKHEVAQLEMIIEGDYEVALTIKERIIPYAVDYYLGIIIESESNSIVSDVDSSYTSSENNSNYNSYESNNSAYNDENSNVDTNEYDDNDDEGGKSNEEPLTS
PBANKA_1113000	A0A509ASB0	Purine nucleoside phosphorylase, putative OS=Plasmodium berghei (strain Anka) OX=5823 GN=PBANKA_1113000 PE=4 SV=1	27	0	388113	293158	855832	180426	1643802	1177165	1012435	355037	142169	298477	475373	0	15948	112499	413006	3	0.934623	-0.0359113	0.0285856	-1.11092	17	322	17	55	MDEEQRHIKLSKKHATPVVLVVGDPGRVDKIKVLCDSYVDLAYNREYKSVECHYKGQKFLCVSHGVGSSGCAICFEELINIGAKVIIRAGSCGSLQPESIKRGDLCVCNAAVREDRVTHMMIHSDFPAVADYEVYSTLLKCAEELNVKVHNGISLSSDLYYPHSIIPTRLLDYSKANVAVVEMELSTLMVMGTLKKVKTGGIFIVDGCPLKWDEGDFDNVLAADRLENMIKISLEACAKLSKKY
PBANKA_0805700	A0A509ANB9	Heat shock protein 90, putative OS=Plasmodium berghei (strain Anka) OX=5823 GN=PBANKA_0805700 PE=3 SV=1	83.2	220109	1846609	798152	1732499	597536	2479052	3771099	1507056	777440	407205	844772	1565458	0	267368	518299	1024028	3	0.538463	-0.24387	0.109503	-1.12795	48	929	48	55	MSKETFAFNADIRQLMSLIINTFYSNKEIFLRELISNASDALDKIRYESITDTQKLQAEPEFFIRIIPDKTNNTLTIEDSGIGMTKNDLINNLGTIARSGTKAFMEAIQASGDISMIGQFGVGFYSAYLVADHVVVISKNNDDEQYVWESAAGGSFTVTKDETNEKIGRGTKIILHLKEDQLEYLEEKRIKDLVKKHSEFISFPIKLYCERQNEKEITESEEEAQDGEKKEGEDAEKKEDDGEQKDGEERPKVEDVTEELENAEKKKEKRKKKIHTVEHEWEELNKQKPLWMRKPEEVTNEEYASFYKSLTNDWEDHLAVKHFSVEGQLEFKALLFIPKRAPFDMFENRKKRNNIKLYVRRVFIMDDCEEIIPEWLNFVKGVVDSEDLPLNISRESLQQ…
PBANKA_1216500	A0A509ALV1	Peptidyl-prolyl cis-trans isomerase OS=Plasmodium berghei (strain Anka) OX=5823 GN=PBANKA_1216500 PE=3 SV=1	18.8	59858	382429	385278	807306	129564	1008257	787140	486108	397461	159765	290759	701518	0	30783	143771	299712	3	0.92155	-0.0246522	0.00387174	-1.12939	6	85	6	46	MSRAKVFFDISIDNKNAGRIVFELFNDITPRTCENFKSLCIGDKVGSRGKNLHYKNSIFHRIIPQFMCQGGDITNGNGSGGESIYGRSFTDENFKMKHDTPGLLSMANAGPNTNSSQFFITLVPCPWLDGKHVVFGKVIEGMNVVRDMEKEGSNSGYVKRPVVITNCGEL
PBANKA_1302800	A0A509AR63	Thioredoxin peroxidase 1 OS=Plasmodium berghei (strain Anka) OX=5823 GN=PBANKA_1302800 PE=3 SV=1	21.6	0	75388	175980	816192	63031	1700396	924747	1148856	121318	56307	316804	804518	0	0	67178	226969	2	0.73213	-0.115057	0.00492814	-1.17499	12	131	12	61	MPSIVGNQAPSFKAEAVFGDNNFGEVSLSDFIGKKYILLYFYPLDFTFVCPSEIIALDKALESFKERNVELLGCSVDSKFTHLAWKKTPLSQGGIGNIKHTLISDISKSIARSYDVLFNESVALRAFVLIDKQGVVQHLLVNNLALGRSVDEILRLIDALQHHEKYGDVCPANWKKGKESMKPSEEGVAKYLSSL
PBANKA_1210800	A0A509AN79	Hypoxanthine phosphoribosyltransferase OS=Plasmodium berghei (strain Anka) OX=5823 GN=PBANKA_1210800 PE=3 SV=1	26.5	92717	259267	450144	631435	213706	1774458	426741	1158809	515798	73981	354838	460534	0	39640	117490	548781	3	0.262122	-0.403656	0.0143403	-1.22359	13	193	13	52	MKIPNNPGAGELGYEPVMIKDDDGYEFDSFVTPDHYKNYLKRILIPNGLIKSRVERMAFDISRTYNGEEFHLLCLLKGSRSFFTSLLKYLDRIHNYYIADASTNSYREHYVRVKSYCNTQSTGRLEIVSEDLSCLKGKNVLIVEDIIDTGNTLSKFCDYLKKFEPKTIAVSALYIKRTPLWNGFKADFTGFSVPNFFLVGCGLDYNENFRDLNHVCIISEEGIKTFMQSSS
PBANKA_0814200	A0A509AKU6	Elongation factor 1-beta, putative OS=Plasmodium berghei (strain Anka) OX=5823 GN=PBANKA_0814200 PE=3 SV=1	30	0	296278	70773	252679	0	420189	610508	507882	175559	0	0	252277	0	0	44596	49668	2	0.103782	-0.820303	0.00841459	-1.25384	5	59	5	20	MASNNANLLTVKGESDYGKLNSFFAENSYFENYMLSGNDIKIYNQIKCVINKDTYPHLYRWYNHINSLPNYVLDKYMDNKNCKKSCPKKTANDDDDNDIDLFGDSNNDDKSILEKKKQEKEEALKKKKQKEKEKNRSILIIEIKPKSIDTDISKIPKLVKEKIVDENIKWGEEVKKLPVAFGLYKLHMSCIIYDDFVNTNELIEKIENIDLDSEEDKKKRTLILGLDDEEYDEDSPEVEDDLDFLIQSAEIITFNKL
PBANKA_1352000	A0A509AY13	Elongation factor 1-gamma, putative OS=Plasmodium berghei (strain Anka) OX=5823 GN=PBANKA_1352000 PE=4 SV=1	46.8	0	234873	111749	251103	26927	770118	632334	579322	242500	19862	71023	303654	0	0	23909	118079	2	0.248989	-0.378512	0.000532784	-1.30719	13	103	13	32	MDLKLLGPKNDIRCLKVQTVASFCNIKLNIPTFEIGIDDNKDEFIKESPMKRLPVLITPQGSLFESNAIGKYLCSIRSEHNLLGNGIFEEGQVNMWVDFCTFELEIPVCCYISNKLNEKSLKHIQDTFSCLNKHLLLNQYMVGNNITIVDIFMSVIINFCIKSGKMTEAFLKQYGNLYRLYTTIINQKQFKYVMGSGSAVNNKKTPTQPKQPNNKEKKKPKEDADDDINLFSDDGLNEKKTKKTNPLDLLPPSKFSLDNWKYKFSNEKDLLKNAMPTFWETYDSNGFSLYYMKYDKLEDECQISFVACNMASGFLQRLENNFSKYSFAVISVLGENKNYDIEGVWLFRGTEIPFEMKDHPSFEYHIFKKLDINNSNDKKLVEDYWCSKEIISNRPVCDR…
PBANKA_1125600	A0A509AKT1	Pyruvate kinase OS=Plasmodium berghei (strain Anka) OX=5823 GN=PBANKA_1125600 PE=3 SV=1	55.5	42784	1224632	173070	500342	63428	749539	1129314	757600	232151	59307	145803	657478	0	0	125907	214946	2	0.0447873	-0.407543	0.000362772	-1.36101	25	416	25	56	MNPFKFKNATAGASLQSAANITLRQILEPNNVNLRSKKTHIVCTLGPACKSVETLVQLIDAGMDICRFNFSHGTHDDHKQMFENVLKAQAQRPNCTLGMLLDTKGPEIRTGLLKNKEAHLKEGSKLKLVTDYSYLGDETCIACSYTKLPQSVKPGSIILIADGSVSCRVLETHDDHVITEVLNNATIGEKKNMNLPNVKVDLPIISEKDKDDILNFAIPMGCNFIAASFIQSAEDVRLIRNLLGPRGRHIKIIPKIENIEGIINFDKILAEADGIMIARGDLGMEISAEKVFLAQKLMISKCNLQGKPIITATQMLESMTKNPRPTRAEVTDVANAVLDGTDCVMLSGETAGGKFPVEAVTIMSKICLEAEACIDYKLLYQSLVNAIQTPISVQEAVAR…
PBANKA_0823400	A0A509AIM6	Phosphoglycerate kinase OS=Plasmodium berghei (strain Anka) OX=5823 GN=PBANKA_0823400 PE=3 SV=1	45.5	29048	616654	327464	739991	63106	731512	729621	566941	266914	90823	217989	527347	11888	0	75898	197726	3	0.490993	-0.150405	5.33883e-05	-1.37981	19	275	19	53	MLGNKLTISDIPSVKNKRVLVRADYNVPIENGEVKDTTRIVATLPTINYLKKEGASKIILISHCGRPDGLKNLKYTLKPVAEVLKKLLGEDVLFLNDCVGSDIEKEINNAKNQSVILLENLRFHIEEEGKGVDAAGNKIKANKEDIEKFQNKLTKLGDIFINDAFGTAHRAHSSMVGIKLNVKASGFLMKKELEYFSKALENPQRPVLAILGGAKVSDKIQLIKNLLDKVDRMIIGGGMAYTFKRVLKNMEIGDSLFDEAGSKIVNEIMEKAKSKNVQICLPVDFKIADKFDNNANTKFVTDEEGIPDKWMGLDAGPKSIESYKDVILGSKTIIWNGPQGVFEMENFAKGSIQCLELVIQATQNGAITIVGGGDTASLVEQQKKKDQISHVSTGGGASL…
PBANKA_1214300	A0A509AQ68	Enolase OS=Plasmodium berghei (strain Anka) OX=5823 GN=ENO PE=1 SV=1	49	44141	271466	339845	853786	56097	1029929	1046831	1433531	218491	38089	378820	817236	0	0	63322	387246	2	0.0855232	-0.361421	2.92629e-05	-1.42243	29	327	29	71	MAHVITRINAREILDSRGNPTVEVDLETTLGIFRAAVPSGASTGIYEALELRDNDKSRYLGKGVQQAIKNINEIIAPKLIGLDCREQKKIDNMMVQELDGSKTEWGWSKSKLGANAILAISMAICRAGAAANKTSLYKYLAQLAGKNTEKMILPVPCLNVINGGSHAGNKLSFQEFMIVPVGAPSFKEAMRYGAEVYHTLKSEIKKKYGIDATNVGDEGGFAPNILNAHEALDLLVASIKKAGYENKVKIAMDVAASEFYNIETKTYDLDFKTPNNDKSLVKTGQELVDLYIELVKKYPIISIEDPFDQDDWENYAKLTEAIGKDVQIVGDDLLVTNPTRIEKALEKKACNALLLKVNQIGSITEAIEACLLSQKNNWGVMVSHRSGETEDVFIADLVV…
PBANKA_1235600	A0A509AME3	Adenosylhomocysteinase OS=Plasmodium berghei (strain Anka) OX=5823 GN=PBANKA_1235600 PE=3 SV=1	53.6	0	209918	96976	276287	63806	455354	459125	385408	128712	14924	93609	184082	0	0	21647	29849	2	0.167025	-0.543611	0.00463445	-1.50286	17	96	17	38	MYDCTSKIKDLSLAPFGKLQMEISETEMPGIMTIREEYEKLKPFKGAKITGCLHMTIETALLIETLQKLGARIRWCSCNIFSTLDYAAAAVSTLENVSVFAWRGETLEEYWWCVEKALTWGENGEGPDLIVDDGADASYLVHKGAEYEKLYEEKKILPDPESGKNEEERCFLSLIKSSILKNPKKWTNMAKKIIGMSEETTTGVLRVKKIEKNNGLLFTAINVNDSVTKQKYDNIYGCRHSLPDGLMRATDFLISGKIVVICGYGDVGKGCASAMKGLGARVYVTEIDPICAIQAVMEGFNVVTLDEIVEKGDFFVTCTGNVDIIKLEHLLKMKNNAVVGNIGHFDDEIQVTDLFNHEGIHIENVKPQVDRVTLPNGNKIIVLAQGRLLNLSCATGHPA…
PBANKA_1340100	A0A509AXF4	L-lactate dehydrogenase OS=Plasmodium berghei (strain Anka) OX=5823 GN=PBANKA_1340100 PE=3 SV=1	34.4	0	1207937	924522	1806592	363817	2634928	2078244	2089634	670579	207857	672715	1449103	0	0	241204	481210	2	0.856073	0.0812296	0.0136298	-1.54888	24	411	24	75	MAPKAKIVLVGSGMIGGVMATLIVQKNLGDVVMFDIVKNMPHGKALDTSHTNVMAYSNCKVSGSNTYDDLKDADVVIVTAGFTKAPGKSDKEWNRDDLLPLNNKIMIEIGGHIKNNCPNAFIIVVTNPVDVMVQLLHQHSGVPKNKIVGLGGVLDTSRLKYYISQKLNVCPRDVNAHIVGAHGNKMVLLKRYITVGGIPLQEFINNKKITDQELDAIFDRTINTALEIVNLHASPYVAPAAAIIEMAESYIRDLRKVLICSTLLEGQYGHKDIFAGTPLVIGGNGVEQVIELQLNADEKKKFDEAVAETSRMKALI
PBANKA_1308600	A0A509APH7	Fructose-bisphosphate aldolase OS=Plasmodium berghei (strain Anka) OX=5823 GN=PBANKA_1308600 PE=3 SV=1	39.8	144289	702621	613451	1008013	156722	1514973	1694501	1307140	386308	102155	366489	1024474	0	23941	80662	519776	3	0.117874	-0.49159	0.0010113	-1.66956	29	477	29	72	MVGCAEYKNAPMKLPKEVAQELAETAKKLVAAGKGILAADESTQTIKKRFDNIKIENTVENRASYRDLLFGTKGLGKFISGAILFEETLFQKNEAGVPLVNLLHDEGIIPGIKVDKGLVSIPCTDDEKSTQGLDGLAERCKEYYKAGARFAKWRAVLVIDPAKGKPTDLSIQEVSWGLARYASICQQNKLVPIVEPEILADGAHTIEVCATVTQKVLASVFKALHDNGVLLEGALLKPNMVTAGYDCTEKTKTDDIGFFTVRTLRRTVPPALPGVVFLSGGQSEEDASINLNSINVLGPHPWALTFSYGRALQASVLNTWQGKKENVAKARAVLLQRAEANSLATYGKYKGGAGGSTAGASLYEKKYVY
PBANKA_1444100	A0A509AV09	T-complex protein 1 subunit gamma OS=Plasmodium berghei (strain Anka) OX=5823 GN=PBANKA_1444100 PE=3 SV=1	60.8	0	0	0	111849	0	162160	200664	318884	0	0	23263	56499	0	0	0	30004	1	ND	ND	ND	ND	15	48	15	30	MMKNPGTVLVFKPNTKREEGRKTQLSNIQASRAVSEIVKTTLGPMAMLKMMLDPLGGIVITNDGNCILREVDVAHPAAKSLIELSRSQDEEVGDGTTSVVILSGELLSIAEVFLKDKIHPTVIVNCYMTALNLSLKYLEEIAIEVDVNNEDNLLKAIDSCLSTKFVNRYNKIVSKLSLEATQCVKVENMIGKKEIDIKRYAKVEKIPGGDIMDSYVLKGVMINKDITHPKMRRYIKNPRILLLDCTLEYKKAESQTNVEILDENTWNQLLLQEEIEVKKMCEYIIDSRCDIVVTEKGVSDLAQHFLVKKNISVIRRVRKTDLNRLERITGATIVNRCDEIVEKDIGTKCGLFEIKKIGDDYYSFFVECENPRACTILLRGATKDVLNEIERNLHDGMNV…
PBANKA_0916200	A0A509AI32	T-complex protein 1 subunit alpha OS=Plasmodium berghei (strain Anka) OX=5823 GN=PBANKA_0916200 PE=3 SV=1	60.1	0	288540	79138	202799	0	278953	271506	379424	53426	0	85621	186271	0	0	27062	0	1	ND	ND	ND	ND	13	58	13	27	MSLSIYGNRENGQDVRTANVTAVQALSNILKSSLGPQGLDKMLVDNIGDVTITNDGATILKQLEIQHPAAKILVNLSELQDQEVGDGTTSVVLLASELLRRGNELIKMDIHPTTVICGYKLAMKESVKYIKEKLSERVTNLGKDVITNIAKTTLSSKFISYESEYFAKMVSNAIQSVKIINDSGKTKYPVSSVNILKVHGLSSLDSKLIDGYAIMSGRASQSMPSAIKNAKIAFLDFPLKQYRLHLGVQVNINDPNELEKIRQREKDITKERVNKILESGANVILTTQGIDDMPLKYFVEAGAIAVRRIKKDDLKRIAKLTNGQIRLTLSSIDGTEKFEPASLGYCDEVYEEKVGDWDVMFFKGCKNSKSNTILLRGANDFVLDEMERSIHDALCSVSR…
PBANKA_0816400	A0A509AID9	Probable ATP-dependent 6-phosphofructokinase OS=Plasmodium berghei (strain Anka) OX=5823 GN=PBANKA_0816400 PE=3 SV=1	146.7	0	196620	32599	108133	22112	132517	163344	132282	29472	0	0	26497	0	0	0	28546	1	ND	ND	ND	ND	13	39	13	13	MEKNKEKESNPIQGKDTEMLNCLMQKLTSKNFLEEKEGKNRFYLVENKDVKIKKLKEHGHSASLNDNLSPLQYERIKYKPTLPKALASEYQILDEDFGDEFINKKDYEEIKKFFKSIDNLPMINVKETNNNELFKGGNVLKIGIILSGGPAPGGHNVISGIYDYAKRYNEESQVIGFLGGIDGLYSKNYVTITDNLMNKFRNLGGFNMLWSGRGKVRNKDDLLAIENIVLKLKLNGLVIIGGDGSNSNAALIAEYLKERNIPISVIGVPKTIDGDLKSESIEISFGFDTATRTYSEIIGNLCTDVKTGNNVYHVVRVMGRSASHVVLECALQTRPNIVLIGEEVEKDKVPLKSIINNIVNIILKRHDLNKNYGVILLPEGLIEFIPEIKILIEELNVIL…
PBANKA_1218200	A0A509ANN1	T-complex protein 1 subunit epsilon OS=Plasmodium berghei (strain Anka) OX=5823 GN=PBANKA_1218200 PE=3 SV=1	59.1	0	46934	0	84794	0	60041	218366	242932	22060	0	0	136148	0	0	0	58786	1	ND	ND	ND	ND	12	62	12	30	MNIAIDEYGQPFVILREEEKKRIKGIEAHKSNILAAKVVADILKSSIGPRGMDKIIVSEDNNVTVTNDGATILEKIDVQHECAKLLVELSKSQDNEIGDGTTGVVIIAGFLLEEAYALIDKGIHPLRIADGFENACNIALKAIEDIAITVDIEKNNHEILKKLSNTSLSSKIVSSKKDLLSNIVVDAVLSVADMKRKDVRFDLIKIEGKPGGLLEESTLIKGIVLNKEISHSQMCKEVKNAKIAILTCPFEPPKPKIKHKLNITNAEAYRDLQAIEKKYFYDMVDALKKAGANFVICQWGFDDEANYLLLKENIPAIRWVGGVEMELIAIATGGKIIPRFEDIHESKLGRADLIREISHGTVNNPMVYIEGCSNTKAITILLRGGNQMMIDECERSVHD…
PBANKA_1137800	A0A509APX7	Glideosome-associated connector OS=Plasmodium berghei (strain Anka) OX=5823 GN=PBANKA_1137800 PE=4 SV=1	291.2	0	47124	0	26829	0	121959	185133	128744	0	0	0	62235	0	0	0	22349	1	ND	ND	ND	ND	12	32	12	6	MPRIQVRMGCDPGVSTAVSSIVQHQNFKRMLMFGLRSLSDFCNPTSKAYKENAYDALNRDAIPSINKAVNNYKDDDDILYCSSKVLFAMSDYCCSEKDNDALKKLVNDGGINAITEIIKTIPKDQDTLKNCMLFIQNMKDISGHIDGELSIALLNVFTSDTHTAKLGSSIISALSVVSKSPSGSKALNDENAHHKLIDHCLSIQNINDETAEIIEGAFDVIKNLLSNGYVVPTIIEKSVVILDKFKSYPRVVSKGSDTMKSAVGPEQLTDCLNILKKEQQGSKEHDSALELLSSLSYISSITDKIVESGGIPVLIELINSGLQQYDSNPEKIARLVAGASRMLGRISNNPSHAGVVYEYGGIATLCTALSYFPNDVDCVSAICIALIPFVSRSNYANEI…
PBANKA_0611600	A0A509AGN9	Ribonucleoside-diphosphate reductase OS=Plasmodium berghei (strain Anka) OX=5823 GN=PBANKA_0611600 PE=3 SV=1	97	0	0	0	190543	0	18511	0	129185	0	0	0	108418	0	0	0	82263	1	ND	ND	ND	ND	11	40	11	18	MNDNIKRLPSSSEGDQLKKTDSGKIFDDGIKRTPSGKPIQTMYVLNRKGEEEDVSFDQILKRIQRLSYGLHELVDPARVTQGVINGMYSGIKTCELDELAAQTCAYMATTHPDFSILAARITTDNLHKSTNDDIGKVAEALYTYKDIRGRSASLISKEVYDFIMEHKDRLNKEIDYTRDFNYDYFGFKTLERSYLLRINNKIIERPQHLLMRVSIGIHIDDLEKALETYHLMSQKYFTHATPTLFNSGTPRPQMSSCFLLSMKSDSIEGIFETLKQCALISKTAGGIGVAVQDIRGQNSYIRGTNGISNGLVPMLRVFNDTARYVDQGGGKRKGSFAVYIEPWHSDIFEFLDLRKNHGKEELRARDLFYAIWVPDLFMKRVKENKNWTLMCPNECPGLS…
PBANKA_0310900	A0A509AF03	T-complex protein 1 subunit theta, putative OS=Plasmodium berghei (strain Anka) OX=5823 GN=PBANKA_0310900 PE=3 SV=1	60.8	0	90686	35524	53311	0	72265	106288	319377	0	0	0	68145	0	0	0	35609	1	ND	ND	ND	ND	11	50	11	26	MFANKLGVNALLKDGYRVVKNSEDAILKNIEACKEISSILQTSFGPKCMNKLIVNHINKKIVSSDCITILNDLEINHPVVNILKKLSETMNYEYGDNTNYVFTIATEMLEKASYLIHDGFNVNDILNGFKLGYNEIDKILEESISFKIENFYDEKEIFKVIKSAMGTKKLSNSYDFLINLLSKCLSTLMPEKIETFDVDNIRITKLNGGNLIDSQFLMGMVISKEPNGIVKKKENAQIMILNCGLEAATTETKGTVLLRNAQELVNFTKGEEDQMKKIIENIKQAGVDVIIVNGAISDIAQHFCDANDIMTLKITSKFETIRICKLLNIHSLVKLRTPEPEEIGKVSSIYVTEIASKKVTIINSKNKKLGTILLRGATTNLLDETERCIHDGINAIKNS…
PBANKA_0406500	A0A509AFF6	T-complex protein 1 subunit eta OS=Plasmodium berghei (strain Anka) OX=5823 GN=PBANKA_0406500 PE=3 SV=1	59.6	0	177504	36344	124427	0	142904	309466	288564	105031	0	88920	150046	0	0	0	133677	1	ND	ND	ND	ND	10	57	10	23	MSHLMSLPIVLLKDGTDKAQGKSQIIRNINACQVIVDIVKTTLGPRGMDKLIYTERNVTITNDGATVMNLLNISHPAASILVDIAKSQDDEVGDGTTSVVVVAGELLNEAKVLLNDGIEPNMIIDGFRNACNVSINKLNDLSLSFVNKSEEEKKNILLKCAQTALNSKLISNHKSFFAELVVSAAYQLGDNLDKSNIGIKKVTGGSCLDTQLIYGVAFKKTFSYAGFEQQPKKFNNPKILLLNVELELKAEKENAEVRIDNPNEYNSIVQAEWDIIFQKLNLIKNSGANIVLSRLPIGDIATQFFADHDIFCAGRVEDADLKRTATATGAVIQTSLFNLNESILGNCGLFEEVQIGNERYNIFKDCLKTKAVTIILRGGAKQFIEEVERSINDAIMIVL…
PBANKA_0619200	A0A509AHA6	Secreted ookinete protein, putative OS=Plasmodium berghei (strain Anka) OX=5823 GN=PBANKA_0619200 PE=4 SV=1	54.7	0	0	0	69423	0	27084	30198	265791	0	0	0	397935	0	0	0	208278	1	ND	ND	ND	ND	8	30	8	17	MNKLLMLSLFLYGVAAVRPFKGNYDDAVKTINDDLERKSKKNGTMNDKPFNLRENINYERKNNYELYTDIDGELKQQKFNVNEPRQILKKNIDEFRYLINDLEILFGVYKFNPRDKEKVLKETLKPESLCFTIMGLISNHLNELKVNNAPIYGLYIKGERNSNYEVNSTLGIYAILSNITISIGNFTFPEMKNAPYQLPYLVGHYDSRTGFKNKDIAYLCPLPKFLIDVIRTTQFGLRVFYNGADIDVKELFPITLSYALENKSLLPIYKEDSNYKAEKTKLLNILSKEAEDIPFRMIKDKSISGKGIKNPEERLLVSKSFFNSREQIKKFISSSGKTPMDSNSIALYFLALSQNAFSKQKNFAMSRITKINVTNIQKSKNGYLSQYSIQLGLENNSSI…
PBANKA_0803100	A0A509AJ17	DNA helicase OS=Plasmodium berghei (strain Anka) OX=5823 GN=PBANKA_0803100 PE=3 SV=1	94.6	0	0	0	13290	0	0	0	0	0	0	0	164976	0	0	0	126688	1	ND	ND	ND	ND	8	23	8	12	MGEKGLDIRTFVDDNHTKYLDAVKNYSSHIDELVKFFDNFEDPSINHINWGKLKYKGYLQKIYNHDTEVLPIYLDDLREHFSKENKDADYSVYNGIMTNTHRYVELLYTAADKCLSDECYKRFIKEYGEEDENEKTKRRNLRRINNEDASGYSTDESEKEAFNNLFRDMIKPIEEIREERMKEYKLPAYLRVNFEIILIPSSRDLVRKMRIVNADCIGSLSTFECEVIRATQLKPRIQVATYECDRCHVFAYKAVDGPFFMPLFDCPGCTNVHGIRGSLKFQAKLSKFVKYQEIKVQELANQLPEGDIPRSMNCIIHGASTTSVQPGMHVTLTGVLMPVTKSGFQALKGGLIAEKVFHIYYVQNNKENFNEHIDNYDKIMEEVQKLKSSPNLYERLAYN…
PBANKA_0702800	A0A509AJZ7	Protein disulfide-isomerase OS=Plasmodium berghei (strain Anka) OX=5823 GN=PBANKA_0702800 PE=3 SV=1	55.4	0	22058	0	145770	0	24682	0	298772	0	0	31942	443628	0	0	0	88622	1	ND	ND	ND	ND	8	45	8	21	MNTKYISFFLFIIPFIFKNYVRSHEDLFNEHITSIHDGELNNFITKNDIVLVMFYAPWCGHCKRLIPEYNEAAIMLSEKKSEIKLASVDATVERGLSQEYGITGYPTMILFNKKNRINYGGGRTAQTIVDWILQMTGPVSTEITGNIEDVLKESNINVAFYMEYISEDNELFKKFNEVGDKNREIAKYFIKKNDKHNKIYCYRKDEKTVEYDEKTPLNDFVAIESFPLFGEINTENYRFYAESPKELVWICATIEQYNEIKEEVRLAAAELRNKTHFVLLNIPEYADHAKASLGINEFPGLAYQSSEGRYLLANPQQSLKNHKDIISFFKDVEAGKIEKSLKSEPIPEEDKNAAVKVVVGNSFTDVVLNSGKDVLIEIYAPWCGHCKKLEPIYEELGRK…
PBANKA_0928100	A0A509ALW3	Phosphoglycerate mutase OS=Plasmodium berghei (strain Anka) OX=5823 GN=PBANKA_0928100 PE=3 SV=1	28.7	0	193114	222848	220819	44272	535674	400901	154643	106772	0	67482	152225	0	0	0	73608	1	ND	ND	ND	ND	8	59	8	35	MTTYTLVLLRHGESTWNQENKFTGWTDVPLSEKGEQEAISAGNYLKEKDFKFDIVFTSVLKRAITTTWYVLKSGDLLHVPVIKTWRLNERHYGSLQGLNKSETAKKYGEEQVKIWRRSYDIPPPKLDKEDNRWPGHNAVYKNVPKGVLPFTECLKDTVERVLPFWFDTIAPAILANKKVLVTAHGNSLRGLVKHLDNLSEADVLELNIPTGVPLVYELDENLKPIKHYYLLDSEELKKKMDEVANQGKAK
PBANKA_1301300	A0A509APB8	Trailer hitch homolog OS=Plasmodium berghei (strain Anka) OX=5823 GN=PBANKA_1301300 PE=4 SV=1	39	0	0	0	11600	0	0	41088	215934	0	0	0	121200	0	0	0	68179	1	ND	ND	ND	ND	8	39	8	37	MSSVSTLPYIGSKISLISNSEIRYEGILYTINTHESTVALQNVRSYGTEGRRQPDIPASNEVYDFIIFRGKDIKDVTVSEAPKTIPDDPAIVSMNIAPSTKNNIGDNLNYNNNVNNINKPLNVQNNMIPQNERNVNLNNRRYYNRHNYNYYYNGNIGNGNMNSNANHNNNHNNNRHYNNFKYKNYRNYDRQSYVIGELESQPNPVLKSKFSPDFDFSSNNLKFDKTNIIDEKSKDVLSANSNIQVGGYDKKSSFFDNISCETLDKQQGKDEKVDREKLRMLDVDTFGIAAAHYRTNMHNRNNNRNKGRNSKNNKMMGNFNYNYYNRNQNPFNRYPAY
PBANKA_1130500	A0A509AM90	Proteasome subunit alpha type OS=Plasmodium berghei (strain Anka) OX=5823 GN=PBANKA_1130500 PE=3 SV=1	27.2	0	0	96713	112105	0	368129	91027	90107	16672	0	28436	32089	0	0	0	55830	1	ND	ND	ND	ND	8	38	8	44	MSYDRAITVFSPDGHLLQVEHALEAVKKGGCAVAIKSSNFAVLAVEKKNIPKLQNPRTTEKLVKLDEHTCLAFSGLNADARILVNKTRLECQRYYLNMDQPAPVDYIAKYVARIQQKFTHRGGVRPFGIATLITGFKNNKEICIYQTEPSGIYASWKAQAIGKNAKVVQEFLEKNYQENMEKNECLLLALKAIFEVVELSSKNVELALLTEGELKYIDEQEVNSLVEIIDNERTKKNAQND
PBANKA_1410300	A0A509ATR4	M1-family alanyl aminopeptidase, putative OS=Plasmodium berghei (strain Anka) OX=5823 GN=PBANKA_1410300 PE=3 SV=1	123.3	0	114142	0	119903	0	0	106915	177041	0	0	68301	112163	0	0	0	22904	1	ND	ND	ND	ND	8	30	8	9	MVLKKLLCFNLFLIIILTFENLSFDKKNTCMINNTIRSNSCCIVNRVLREKTHHYSSKISKSIPFIQNFSLEKYFTGESLQKNILNNINKLGGAHLFHISKSHLTAKSGNKNTEFIGEATELFKGFKRNFGINMTENKQTNIGRMLCENDNNNGGEDTSTEKAIFKKSKDSQIHYRTDYKPSGFTIDNVTLNINIFDNETIVRSSLNMCTNENYADEDLVFDGVGLSIKEISINNNKLTEGEDYTYDNEFLTIFAKNVPKENFVFLSEVVIHPETNYALTGLYKSKDIIVSQCEATGFRRITFFIDRPDMMAKYDVTLTADKKKYPVLLSNGDKLNEFDIPGGRHGARFNDPHLKPCYLFAVVAGDLKHLSDNYVTKYTKKPVELYVYSEAKYVSKLKW…
PBANKA_1134100	A0A509ALA2	T-complex protein 1 subunit delta OS=Plasmodium berghei (strain Anka) OX=5823 GN=PBANKA_1134100 PE=3 SV=1	57.9	0	19189	23879	28837	0	134553	128839	82376	0	0	12405	30401	0	0	0	22082	1	ND	ND	ND	ND	8	29	8	22	MADVAKGKSSENLNRNEKQNDVRQMNILAAKAVADVTRTSLGPKGMDKMIEDGKGGVIITNDGATILKEMAVAHPTAKMIVELSKAQDVEAGDGTTSVVVMCGSLLSVCKNLLDKNIHCQKISESFFEASVKSLEILREMSIPIDLNDKNMLIQNAITSLNSKVVSHNSSLLAPIAVDVILKITDINNDKNVDLNNIRIVKKLGGTIEDTEIVDGLIFTSNKICKKAYGIKNLSQAKIGLIQFCLSLPKTDMDNTVVVKDYNSMDRLLREERVIIAKMVKKIASTGCNLLLIQKSILRDAVNDLALDFLAKAKIMVIKDIEREDIEFISKTCNCVPVASLDYFTPDKLGYAENVVTESVGYGEIVKITGVESKNTISVLVRASNNMMLDEAERSLHDAL…
PBANKA_1231000	A0A509AUT7	40S ribosomal protein S11, putative OS=Plasmodium berghei (strain Anka) OX=5823 GN=PBANKA_1231000 PE=3 SV=1	16.1	0	31000	0	79946	0	394661	67460	212134	78418	0	49249	309578	0	0	0	288500	1	ND	ND	ND	ND	7	41	7	38	MASKKVKVPQPETAIVSGPQPKEGELVFGVAHIFASFNDTFIHVTDLSGRETLVRITGGMKVKADRDESSPYAAMMAAQDVAARLKELGVTAIHIKLRASGGTKSKTPGPGAQSALRALARSGLKIGRIEDVTPIPTDSTRKKSGRRGRRL
PBANKA_0615200	P62345	Calcium-dependent protein kinase 4 OS=Plasmodium berghei (strain Anka) OX=5823 GN=CDPK4 PE=1 SV=2	60.6	0	0	15594	63402	0	24900	0	249917	0	0	22995	433821	0	0	0	201421	1	ND	ND	ND	ND	7	38	7	13	MGQEMSTQSDMQNENQKGNKRNLKGSQGKNGLKERSTSISKEIVKNSFNNSKLRPGMFIQNSNVVFNEQYKGIKILGKGSFGEVILSKDKHTGHEYAIKVISKKHVKRKTDKQSLLREVELLKMLDHINIMKLYEFFEDNNYYYLVSDVYSGGELFDEIISRKRFYEVDAARIIKQVLSGITYMHKNNVVHRDLKPENILLETKNKEDMIIKIIDFGLSTHFEYSKKMKDKIGTAYYIAPDVLHGTYDEKCDIWSCGVILYILLSGCPPFNGSNEYDILKKVETGKYTFDLPQFKKISDKAKDLIKKMLMYTSAVRISARDALEHEWIRLMTSKDNVNIDIPSLELSITNIKQFQSTQKLAQAALLYMGSKLTTIDETKELTKIFKKMDKNGDGQLDRN…
PBANKA_1303800	A0A509AR74	Triosephosphate isomerase OS=Plasmodium berghei (strain Anka) OX=5823 GN=PBANKA_1303800 PE=3 SV=1	27.8	0	248445	40774	135457	16322	418614	169979	274801	138695	0	187474	590194	0	0	0	13472	1	ND	ND	ND	ND	7	47	7	32	MARKYFVSANWKCNGTEYSIKSLADSFNTVDFDPSKLDVVVFPVSVHYDLTRKLLNKKIGTGIQNVSKFGNGSYTGEVSAEIAKNLNIEYVLIGHFERRKYFHETDEDVRQKLQQAIKNNLKAVVCFGESLEQRESNKTIDVITKQVKAFVDLIENFDNVILAYEPIWAIGTGKTATPEQAQEVHKEIRKIVKEICGEAQANKIRILYGGSVSVENCTSLIKQEDIDGFLVGTSSLKTSFTEIIKSAM
PBANKA_1305300	A0A509APF9	FACT complex subunit SSRP1 OS=Plasmodium berghei (strain Anka) OX=5823 GN=PBANKA_1305300 PE=3 SV=1	57.1	0	0	0	0	0	30898	23953	81400	0	0	21991	182376	0	0	0	149607	1	ND	ND	ND	ND	6	20	6	17	MPADNTGSTSSNSPVISIGNIRGLGGCDYGPFRMSNEFLGWKNKKTNSVYQYKCNDISEGEWIKLSYNNNRLHLKFNESKDNLIVFFDGFPDRNLSEITQHFQKYFNIKLGTRKLATKGWNWGEFKLENSNLIFDIDKKYAFNINTNNINQLNVQIKTDIAIELKNDENKQNTNEDVLSEIRFYYPHENDENQNFQDLKNNLLEKVNIGDSKSECIASLSNIPLLVPRGRYEIEMYSKTFKLHGKSYDFTVQYSNINKMLLVPKTNSNQYILIFSLNNKIKQGQTEYPFILIQLSNDDDMDLDINASEEDIQNYKLEKTLTGKAYDVVTRLFTALAKKNAIIPGDYRTAKNEHGITCSYRAASGQLYPLNKYFLFVVKPVILISFDDIVTLSFQRTGNI…
PBANKA_1117700	A0A509AKK4	L-lactate dehydrogenase OS=Plasmodium berghei (strain Anka) OX=5823 GN=PBANKA_1117700 PE=3 SV=1	34.3	0	0	0	148262	0	204842	181090	304881	0	0	21024	83583	0	0	0	90832	1	ND	ND	ND	ND	6	29	6	31	MPKISLIGSGQIGAIVGQLCLSENIGDIVLYDVVNGIPQGKSLDLKHYSTIIGVNRKIIGTNNIKDITDSDVIVITAGVQRKEGMSREDLIGINGKIIKSVAESVKQYAPNAFVICVTNPLDVMVNVFHKYSNLPYEKICGMAGILDTSRFRYLLSEKLNVSPENINAIILGGHGDLMMPLPRYCSISGIPLLDYIKNHDMSEKDISDIIEKTRNMGGEIIKLAKSSAAFAPAASIIKMIKSYLHDQNQLFTCAVYLSGLYNCKDLYAGSTAIINKTGAHPIEFILTEEEQACYQKSINNIRENTQKALNVID
PBANKA_1450300	A0A509AR98	ATP synthase subunit beta OS=Plasmodium berghei (strain Anka) OX=5823 GN=PBANKA_1450300 PE=3 SV=1	57.8	0	0	0	0	0	0	14631	95488	0	0	36786	151903	0	0	0	33251	1	ND	ND	ND	ND	6	16	6	19	MNKFRFLKSLCSKKFANKINSQSLKTNCRFLSTTENANLKKNINSSNIKGNVKGSANVGKISQVIGAVVDVEFQNTPPAILNALEVELDNKKLILEVAQHLGNKVVRTIAMDATDGLIRGQDVIDCGIPISVPVGKETLGRIMNVIGEPIDECGDIKSKKLLPIHRDPPLFTDQSTEPALLITGIKVVDLIAPYAKGGKIGLFGGAGVGKTVLIMELINNVAKKHGGYSVFAGVGERTREGNDLYHEMLTTGVIKKKKIKDNEYDFSGSKAALVYGQMNEPPGARARVALTGLTVAEYFRDEENQDVLLFVDNIYRFTQAGSEVSALLGRIPSAVGYQPTLATDLGALQERITTTKNGSITSVQAVYVPADDLTDPAPATTFSHLDATTVLSRSIAELG…
PBANKA_0614500	A0A509AJ64	Eukaryotic translation initiation factor 3 subunit I OS=Plasmodium berghei (strain Anka) OX=5823 GN=PBANKA_0614500 PE=3 SV=1	37.2	0	0	0	0	0	147603	19297	0	0	0	0	0	0	0	0	16627	1	ND	ND	ND	ND	6	17	6	27	MKRKYLCGHNRPLTHVNTNCDGDLLFTTGRDKKFILWNLADGNQIGLYECSGAVYNSDVTFDSKRVVCSSAANKIYIFDVYTGETLKVIDESGPVRFVEFNRDPLNQNRIIAAIDRLKADHKRFIKLYDLKSDTLIWKQEHESRCIQVRWCFFDKLILSAHENGEIVIWNSEDGHQIRKFQAHTKEVTNLSFDKDRMIMLSSSTDGTAILRDAVNFDIINEYKADRPLNTCDISPLFRSENNSKNHIILAGGQAAEHVTTTATGEGKFQTLLYDIIHANELGSIKGHFGTVHSIKFLPHGDGFVSGGEDGFARIYHFDQDYFIGKYD
PBANKA_0917900	A0A509AK18	26S protease regulatory subunit 6A, putative OS=Plasmodium berghei (strain Anka) OX=5823 GN=PBANKA_0917900 PE=3 SV=1	50.9	0	0	0	31825	0	33303	34116	131552	0	0	0	0	0	0	11663	0	1	ND	ND	ND	ND	5	10	5	13	MNVENIFENEQVNVEEIEVLSNPEIRTRISLIDTEIKILKNEHTRLKNEYKNIQEKIKDNVEKIHLNKMLPYLVANVVESLDLQDEEDEQEPKDEYDLYDNPNITNNNIYGNISKNIPEEGFRDIDDEKRGKCMVIKTSTRQTIFLPVPGLIEASELKPGDLVGVNKDSYLIIDKLPPEYDNRVKAMEVIEKPTEDYSDIGGLDKQIEDLVEAIVLPMLHKEKFEKIGIKPPKGVLMHGPPGTGKTLLARACASQTNATFLKLAGPQLVQMFIGDGAKMVRDAFNLAKEKAPAIIFIDELDAIGTKRFDSELSGDREVQRTMLELLNQLDGFSTDETVKVIAATNRPDTLDPALLRSGRLDRKIELPHPNEESRARILQIHSRKMNVHKDVNFEELARS…
PBANKA_1449000	A0A509AV76	Microgamete surface protein MiGS, putative OS=Plasmodium berghei (strain Anka) OX=5823 GN=PBANKA_1449000 PE=3 SV=1	65.3	0	0	0	39663	0	0	0	390037	0	0	0	696191	0	0	0	251678	1	ND	ND	ND	ND	5	17	5	9	MSQRYLVIIHCVFLLLNLFKTNCYLVQFHGNSKTNHYQCVGCINEKNETLRSIDNKNNILNSSFLHVQEDDNNEFYSLKLNEKNFRWSIPLALGSEKSIIDLVLTISNSSTAFYCHDENKPSLETEVLGYDLSKSTDLKYVDCTNEECTEILGSNKCLILDEYFKLLKGYALRKKSCKSKFCDYVNKMNFLNMSNPGVDKNASVCPFDKKVDNDKIKGFYFNDSFLISKEKKITYNYFGCITENENLNINENTSGIIGLANDYKADKKYSSILNAFISNSGSKKNIFGLCLIDGGGFISFGGYDKAALEPALPAKEIKGSEEYEDLDTSYRNPLLSIGDDSDNLIWTNYSESTNELYKVKVTKINLNVTDDNSEYDVNKDFILDTYDYFISLPREISTK…
PBANKA_0914300	A0A509ALW4	Protein disulfide isomerase related protein, putative OS=Plasmodium berghei (strain Anka) OX=5823 GN=PBANKA_0914300 PE=4 SV=1	49.2	0	0	0	0	0	103466	86655	243453	25498	0	123052	299212	0	0	0	159749	1	ND	ND	ND	ND	5	33	5	13	MKLYGKIHFILPVLYLFAKYASSLYTNVKEIKTVESLNEFDELINSQKKCLVQFYATWCRVSRGFSNDFINIAKTVKDDILVIAIKNEDIINKYKIKTYPNIQLFFTNDKKEKHIEQFDGNYKIKDVVSFIYDNIKNYRLKELNIDVGKKDNSNKKNKKNKNSGKVIVLNDSNFDQNVLKNDDNVWFVFFYAPWCGHSKPIHPMFDELAKKTSHLKNARIAKIDATVEQRTAQTYEIKHYPSFRLFPSGNKKPHTAIDYNESRTVNDLYQFFLKYYKEKKEIIQLTSRNVFDEHCENDVCLLAILPSKEDIEPSSLKSYIQILTSVIKDVNHLPVTLMWTHAGDQLDIVQKLNLTFGFPTVIAISFSKNVYSILKGNYSEQSIKNFVIQMMTGKSSVDN…
PBANKA_1135100	A0A509ALB0	40S ribosomal protein S15, putative OS=Plasmodium berghei (strain Anka) OX=5823 GN=PBANKA_1135100 PE=3 SV=1	17.2	0	0	0	0	10940	339036	43276	81414	61748	0	22703	154502	0	0	0	159725	1	ND	ND	ND	ND	5	21	5	28	MGRMYGKGKGISSSTIPYKRKQPSWLKQKPSEIEDAIIKLAKKGQTPSQIGATLRDNYGIPQVKAVTGNKILRILRAHGVATTIPEDLYFLIKKAVSMRKHLEKNKKDKDCKFRLILTESKIHRISRYYKRKRLLPSNWKYQSSTASALIA
PBANKA_1354400	A0A509ASX0	60S ribosomal protein L18a OS=Plasmodium berghei (strain Anka) OX=5823 GN=PBANKA_1354400 PE=3 SV=1	21.7	0	0	0	0	0	292475	32948	129455	27845	0	0	148204	0	0	0	141042	1	ND	ND	ND	ND	5	32	5	35	MDNIKDKSLKINIFQYHVVGRATPTDKNPNPNVYRMCIFAKNDTNAKSRFWYFMKKIHKLKKSNGELLACEQIREKNPLRAKTYGVLLRYDSRTGTHNMYKEFRDTTKEGAIAQLYSEMAGRHRARASSINIIRISEISMQHAKRPHIKQLLKKRLRFPALHLPTLAKEYKRKYAPTRPSTYRM
PBANKA_1426900	A0A509ARI9	ATP-dependent RNA helicase DBP1, putative OS=Plasmodium berghei (strain Anka) OX=5823 GN=PBANKA_1426900 PE=4 SV=1	104.2	0	0	0	50633	0	41639	101090	105873	0	0	0	0	0	0	0	54981	1	ND	ND	ND	ND	5	15	5	7	MNYNNNISNGTFRKSEDDRNNYVRNNNYENNTNEDQGFSKKECIDIEESSNTQGYNHIRNKREVDNNMIPNVTNVSNARNVYDGNMENECYGINDNNNQNNRNIISDGRNRSGNNNANGNQENYKKKFGNKNFNNENGNQKNKVGMQNQQKKSGGLNHFMGNNLEKNKMRIGSISHNTISGNNSNDMNNEENIYKNNDNNNNSGANNNGNNNFKGDKLKYKPPMLRNQGGINRNNFNRMNYNKNSGNNGEGGGRGHFGFNNRHYNIPKTAWANRDNRRYYPEKEDEIYSNVKIEKGVNFELYDTIPVEIKGYNSDNIIPIESFTDSYLNLNELLLSNIKKVHYDKTTPIQKYSLSIIMNKHDLIGVAQTGSGKTAGYLLPIINHMLLNDPPKHTFYEDN…
PBANKA_1437300	A0A509B0M9	Endoplasmin, putative OS=Plasmodium berghei (strain Anka) OX=5823 GN=PBANKA_1437300 PE=3 SV=1	93.2	0	25835	0	0	0	0	0	46876	0	0	21161	205921	0	0	0	47046	1	ND	ND	ND	ND	5	14	5	7	MKIKTKYTYAFFVFLIVLNLLSKNNNVLCHDDQSKVDGENGSGPKGYVKRDVDMISEIDENEKPTSGIENHQYQSEVTRLLDIIINSLYTQKDVFMRELISNAADALEKIRFLSLSDESILKDEKKLEIRISANKDKNILSITDTGVGMTKDDLINNLGTIAKSGTSNFLETISKSGGDMSLIGQFGVGFYSAFLVADKVIVYTKNNNDEQYIWESTADAKFSIYKDPRGATLKRGTRISLHLKEDATNLLNDKKLTDLIAKYSQFIQFPIYLLYENVYTEEVLADIAKEMENDPNYDSVKVEESDDPNKKTRTVEKRVKQWKLMNEQKPIWLRPPKELSEDDYKNFYSVLTGYNDAPLYQIHFFAEGEIEFKCLIYIPARAPSINEQMFSKQNSIKLY…
PBANKA_0107100	A0A509AEN4	Proteasome subunit alpha type-2, putative OS=Plasmodium berghei (strain Anka) OX=5823 GN=PBANKA_0107100 PE=3 SV=1	26.4	0	0	102230	126031	0	307198	57054	111345	0	0	0	91435	0	0	0	41678	1	ND	ND	ND	ND	5	26	5	28	MADGEYNFSLTTFSPTGKLVQIEYALNRVSSSSPALGIRAKNGVIIATEKKTPNELIEENSIYKIQQISDHIGIVYAGMPGDFRVLLKKARKEAIKYSLQYGNEILVKELVKEIASIVQEFTQTGGVRPFGLSLLICGVDTYGYHLYQIDPSGCYFNWMATCIGKDYQNNISFLEKRYNSDIEVEDAIHTAILTLKESYEGVMNEKNIEIGVVCNNNTFKILTPNEIKDYLIEIE
PBANKA_1404900	A0A509ATH3	26S protease regulatory subunit 10B, putative OS=Plasmodium berghei (strain Anka) OX=5823 GN=PBANKA_1404900 PE=3 SV=1	44.7	0	16847	0	47961	0	72659	56072	98391	0	0	0	18604	0	0	0	21439	1	ND	ND	ND	ND	5	19	5	15	MDNKESVRLYVKKVIEHREIESKVKKLRLDIKELNKKYEKTEDNLKALQSVGQIIGQVLKQLEDDKFIVKASSGPRYVVGCKSKINKSKLEIGTRVSLDMTTLTVMKRLPCEVDPLVFNMISDIDKGENSTNKVNYNQIGGLSEQIRQMREVVELPILNPFLFKRVGIKTPKGVLLYGPPGTGKTLLARAMASNINCNFMRIVVSSIVDKYIGESARIIREMFTYAKEHQPCIIFMDEIDAIGGRRFSQGTSADREIQRTLMELLNHLDGFEELGNVKIIMATNRPDVLDPALVRPGRLDRKIEIPLPNETARIEILKIHANKMTKMGDIDYESVCRLCEGFNGADLRNVCTEAGMFAIRAMRDYVIEEDFYKAARKINEAKKLEGKLEYEKI
PBANKA_1441100	A0A509AUW8	Haloacid dehalogenase-like hydrolase, putative OS=Plasmodium berghei (strain Anka) OX=5823 GN=PBANKA_1441100 PE=4 SV=1	32.8	0	0	24628	184079	0	107416	109792	105585	0	0	46162	107772	0	0	0	20625	1	ND	ND	ND	ND	5	28	5	23	MSKSVEETLKGADIKLLLIDFDGTLFVDKDIKVPKENIEAIKEAIEKGYMVSICTGRSKVGILSAFGEENLKTMNFYGMPGVYINGTIVYDQIGYTLLDETIQTDVYAELINYLVEKNLVNQTIFHRGESNYVTEDNKYADFLQKNYSENRSIIIRHNELLKYKTMNKLMIVLDPSESKQVIDNLKKKFSKKLTIFTTYNGHAEVTKLGHDKFTGINYLLKHYNISNDQVLVVGDAENDIAMLSNFKYSFVVANATDSAKYHAKCILPLTHKEGAVAYLLKKVFELKK
PBANKA_1003800	A0A509AJD5	Vacuolar proton pump subunit B OS=Plasmodium berghei (strain Anka) OX=5823 GN=PBANKA_1003800 PE=3 SV=1	55.8	0	69888	0	75575	0	147841	133982	170576	0	0	0	29536	0	0	0	20077	1	ND	ND	ND	ND	5	28	5	15	MSKEVIHTKVEASRVNALAAVRNYKVCPRLEYKTISGVQGPLVIIEDVKFPKYSEIVTIHLSDNTSRQGQILEVCGKKAVIQVFEGTSGIDNKNSYVEVSGDILKMPMSDEMLGRVFNGSGKPIDKGPNILADDYLDINGNPINPQCRVYPKEMIQTGISTIDVMNSIVRGQKIPLFSAAGLPHNEIGAQICRQASLVQGKDVLDHSDENFAVIFGAMGVNMETARYFRQDFEENGKMERVCLFLNLANDPTIERILTPRIALTTAEYLAFEKEMHVFVILTDMSSYADALREVSSAREEVPGRRGYPGYMYSDLSTIYERAGRVEGRNGSITQFPILTMPNDDITHPIPDLTGYITEGQIFVDRNLYNRQIYPPINVLPSLSRLMKSGIGKNMTRIDH…
PBANKA_1105100	A0A509ALY4	DNA mismatch repair protein OS=Plasmodium berghei (strain Anka) OX=5823 GN=PBANKA_1105100 PE=3 SV=1	142.6	0	0	0	0	0	0	0	0	0	0	0	95815	0	0	0	111065	1	ND	ND	ND	ND	4	10	4	3	MGEVNKGNTTGACSNKKQASILSFFKTQNNKIKKESSIKCNNDKSCEEKESKEKESKIDILNNFVCPKIDENSFGNSKAMDSDRKGDIFSSTSNFDGCEKINNNKNSDSVKYENNGYMMDNAEISTEEDIIVKKKRKIILDSSYDEYYGSDSNDQKKKKNFVKNEGVDHKLKNLLYDANKKGEDILINSNKEDDNNNTDIKYVQRKKVEDNKKSQELDYLRNKFLNLPITLNNDKFRLYIEQYFLYCNSFEFPKWIQPQYIRDINLNPPDNPNYDSSTIWTPPQDHQWAIEYKQAHYTPGMQQFWKIKSKNFDKIIFFKMGRFYEIFYIDACIMHTICGLNWMNGEQKPHLGFPEQSLHLYAKKVINSGHKVVVIEQMETPKELEQRNKTSSGPKDKAI…
PBANKA_1232200	A0A509ANT9	FACT complex subunit OS=Plasmodium berghei (strain Anka) OX=5823 GN=PBANKA_1232200 PE=3 SV=1	127.5	0	0	0	0	0	0	19974	28337	0	0	0	132480	0	0	0	85787	1	ND	ND	ND	ND	4	11	4	5	MSEGLDVDNAKEKINFMFTYWKNINNKDFENSNAFCILSGKSSKDDNATIQEQFQMWLLGYQLTETFFLFCKKNEKLIILTSDKKKKFLQPLLDKMNNITILERNNNDNSENFEKIKNEINMFNDKELLILKDKDSTGSFFEACYDFIKNLNKTEIDVNNNIKSLLNLRSKSDVKLQKSASDIASIIMKNVLITTIENSLDSEEYESHNKIKEKVLKFNENKKCVVKIKDKLKADIDDIDVIYSSVQSGNNFLLNFKNTNDNNYLSQNDGTIVIGIGVKYKELCANINRTLLLNAKEYHKELYNFTFSIQKYIINDCLKYNTSFSDVYKKAMQYIKDNKRNYQTIGNINLENYFIKCLGHVIGFEFMEKEFLITVNNSNATIEKNTSYNISVGFENVQM…
PBANKA_0211500	A0A509AFB5	Proteasome subunit alpha type OS=Plasmodium berghei (strain Anka) OX=5823 GN=PBANKA_0211500 PE=3 SV=1	28.3	0	0	34756	165741	0	170376	54387	74759	30202	0	0	91161	0	0	0	61577	1	ND	ND	ND	ND	4	18	4	19	MFSTRSEYDRGVNTFSPEGRLFQVEYALGAIKLGSTAIGICVNDGVILASERRIASPLIEKDSVEKLLPIDDHIGCAMSGLMADARTLIDHARVECNHYKFIYNENINIKSCVELISELALDFSNLSDSKRKKIMSRPFGVALLIGGVDKNGPCLWYTEPSGTNTRFLAASIGSAQEGAELLLQENYNKNMSFEEAEILALTVLRQVMEDKLSSSNVEIASIKKSDQTFYKYKPDDITKIINSLPSPIYPTIDMTS
PBANKA_1226500	A0A509AM51	Proteasome subunit beta OS=Plasmodium berghei (strain Anka) OX=5823 GN=PBANKA_1226500 PE=3 SV=1	29.8	0	0	104533	137324	0	250642	134164	145077	0	0	0	103394	0	0	0	53572	1	ND	ND	ND	ND	4	24	4	21	MTLGPVVTGTSVIALKYRNGVMIAADKKASYGSYAKFQNVQRIFKISNKTVMSFSGELADAQYLHELLTRVNVNDVVEKKSKYDLHDTKFYHSYVSRLFYNRKNKIDPLFNNIIIAGLNSQEYDDNDKDILLYSEKQNNEEYKDIDKKDLYIGFVDMHGTQFCEDYITTGYARYFALTLLRNHYKDNMTEHEARSLLNECLKILYFRDTTASNKIQIVKITSKGVEYEEPYILNCDLNSRDYIYPSTMLPATGCMW
PBANKA_1018600	A0A509AMY2	60S ribosomal protein L21, putative OS=Plasmodium berghei (strain Anka) OX=5823 GN=PBANKA_1018600 PE=3 SV=1	18.7	0	24656	0	0	0	257767	0	73557	27999	0	0	140923	0	0	0	44188	1	ND	ND	ND	ND	4	10	4	27	MGGKSKGKRSGTRYKFSKGFRKHGECTANKYLEKINYGDYVDIVCDSSQQKGMPFNFYHGRTGKVFHITKRGVGVLVNKRVRHRIIQKKVCVRIEHIRKSRCNEDFILRKKKNQELIKQAKLKNEQISVKRKTEGPKPAAMIKVPPSKLITVEPLPFYEEY
PBANKA_0109100	A0A509AEQ7	transketolase OS=Plasmodium berghei (strain Anka) OX=5823 GN=PBANKA_0109100 PE=3 SV=1	75.5	0	142718	0	93994	0	0	100153	108696	0	0	0	41096	0	0	0	18971	1	ND	ND	ND	ND	4	16	4	9	MNTEIDIKCVNEIRMLAAELPLKANSGHQGAPIGCAPIAHILWGYVMNYYNEDTEWINRDRFVLSNGHASSLLYTMLYLTEQGLNLDDLKNFRQLGSLTPGHPENYITKGVEVTTGPLGQGAGNAVGMAICAHNLSEKYNTNDFEIFNNYIYALCGDGCMQEGVFCEAASLAGHLGLGRLILIYDDNKITIDGNTELSFTEDIGKKFESFNWEVKIVKDGNTNFEKIYKEIEECKKNLKQPSLIIVQTLSGFGTKVEGSYKSHGLALKDDDIKNAKKNLGLDFEKKFHISDQVKNFYKNVLQKNKENYIKWKETFDKYMLKYPEKGQEILRRFKKELPNNWENVLPKYTVNDSPLATRNLSGIALNCINKILPELIGGSADLTESNCTALKDEKDITKN…
PBANKA_0414600	A0A509AID7	40S ribosomal protein S15A, putative OS=Plasmodium berghei (strain Anka) OX=5823 GN=PBANKA_0414600 PE=3 SV=1	14.9	0	0	0	0	0	138375	0	93171	0	0	0	223323	0	0	0	278082	1	ND	ND	ND	ND	3	11	3	20	MVRMSVLADCLKTINNAEKRGRRQVLIRPSSKVVIKFLQYMQKKGYIGNFEIVDDHRSGKIVVNLLGRINKCAVISPRYDVKLDEIEKIITNILPSRLFGHLILTTPYGIMDHEEARRKHTGGKVLGFFF
PBANKA_1126200	A0A509AMC5	Protein DJ-1, putative OS=Plasmodium berghei (strain Anka) OX=5823 GN=PBANKA_1126200 PE=4 SV=1	20.7	0	0	0	76743	0	191868	108717	101057	0	0	39644	138446	0	0	0	147154	1	ND	ND	ND	ND	3	18	3	24	MSMKKKALVVVASGSEDVEYITTVDILRRANIDVTTASIHETEKVQLQSKNTVFADTIIDKVKDYIFDVIIIPGGMKGSNAISDCQVVIEMLRDQKKNNRLYAAICAAPAIVLHRHSLIDDVEAVAYPSFESDFKHIGKGRVCVSKNCVTSLGPGTAVEFALKIVELLLDRESALRLASGFLLHPSITF
PBANKA_1456100	A0A509ARE9	40S ribosomal protein S17, putative OS=Plasmodium berghei (strain Anka) OX=5823 GN=PBANKA_1456100 PE=3 SV=1	16.1	0	0	0	0	0	196532	0	144041	70832	0	0	106529	0	0	0	138028	1	ND	ND	ND	ND	3	21	3	28	MGRVRTKTIKRAARQIVEKYYAKLTLDFQINKKITEEVAIIPSKRMKNKVAGFVTHLMKRIQKGPVRGISLKLQEEERERRLDFVPEKSQIDVNVIYVEPDTVKMIKSLGINISNMKIHNPMINTNHQKQNRMNTQY
PBANKA_0607400	A0A509AJ02	Protein phosphatase PPM11, putative OS=Plasmodium berghei (strain Anka) OX=5823 GN=PBANKA_0607400 PE=4 SV=1	162	0	0	0	0	0	0	0	0	0	0	0	0	0	0	0	110904	1	ND	ND	ND	ND	3	3	3	2	MEYIGNIYDKVLSGYVSAHVLKYKSWEEKIIGKEACKNDSDYIKKNLEEILGTFVKNGKFSHSLWEQHKMFIGDEGIYLLGEIITICQIVQFVDSDDIENVQSNEEFKTNLIDELKKRLIIKKKTEILEEKIISNISMCNGDNNFYNNYYYDDIDEDEADNNSDYENDQNNIDSIASVSNSTKHDSNGLAGNNNTKLNDKNAVSNFVEMLCAGKANKYGFCEYDHKFNDKYNLKNIKNEYKSSKSIEHSILSFSEDYDHKYVCLLLNNSGIQEVRILRFSKDCINTNKLLDTLKGTVTFLNELRHLFKYFRSQIFFKDKIYGEFCAYIKFHKSDPNFSGTKALNEFFNSLNENAIKYLFFGLNEYNLNLLEEAISYCPIATFSFFKNIKLLKNMNVNSV…
PBANKA_0617200	A0A509AH85	40S ribosomal protein S10, putative OS=Plasmodium berghei (strain Anka) OX=5823 GN=PBANKA_0617200 PE=3 SV=1	16.6	0	0	0	19930	0	226377	0	68847	12465	0	16831	120963	0	0	0	109231	1	ND	ND	ND	ND	3	22	3	23	MDKKTLPHHKYSYIPKQNRKLIYEYLFKEGVIVVEKDAKIPRHPHLNIPNLHIMMTLKSLKSRKYVEEKYNWKHQYFILNNEGIEFLREFLHLPPSIFPATLSKKTINRAPKIDDEFSRELRQPMGRGRMYDKRNFD
PBANKA_1425100	A0A509AQD2	Importin subunit alpha OS=Plasmodium berghei (strain Anka) OX=5823 GN=PBANKA_1425100 PE=3 SV=1	61.1	0	49146	0	26397	0	40093	126096	115834	0	0	0	121416	0	0	0	96596	1	ND	ND	ND	ND	3	15	3	7	MDRRIEARRKEFKKNCDDTRRKREDLVVQIRKQQRECQLESKRAMVMANIGLEENNSYNINYVKSNQNDSTNDSLYNTSSNNSSNTLEMLKKIPSLAIGVRSSEYVTQLNSTKELRKLLSIEKGPPIQEVINSGVVPYIVEFLKYDDKTDLQFEAAWVLTNIASGSQEQTKVVIDNNAVPYLVRLLNSEKEDVCEQAVWALGNIAGDSAECREYVLNQNSLPLLLKILRSSHKRTLIRNAAWTLSNLCRGKPAPKFEIVSKALPTLAVLIYNDDEEILTDACWTLSYLSDGSNENINAVLDAGVAERVVELLSHGSFLVQTPALRTVGNIVTGDDLQTDVVVKLNAVQKLSCLLNSSKKSIKKEACWALSNITAGNISQIQAVIDNNVIPQLINILMKE…
PBANKA_1401300	A0A509ATD7	40S ribosomal protein S7 OS=Plasmodium berghei (strain Anka) OX=5823 GN=PBANKA_1401300 PE=3 SV=1	22.5	0	0	0	19368	0	181808	61138	28034	0	9761	0	81128	0	0	0	94526	1	ND	ND	ND	ND	3	13	3	22	MVSVKSKILKSNPSDLEREIAQCLVDIELSASSDIKNDTKEIKILSCDLIEVEKIKKKTILIYIPYKIYATYVRKIQRKLINELEKKTKKYVVLVAKRTILKSRQKTKSFKILPRSRTLTSVYDSVLEDIVSPSEIIGKRISMKSDGKRVFKIMLDPKERQRDNIDEKLISFAAVYKKITKRDTIFSLPPSNEK
PBANKA_1340300	A0A509AQC7	Phosphoribosylpyrophosphate synthetase, putative OS=Plasmodium berghei (strain Anka) OX=5823 GN=PBANKA_1340300 PE=3 SV=1	48.2	0	0	0	0	0	64554	44089	0	0	0	32116	83525	0	0	0	84775	1	ND	ND	ND	ND	3	8	3	11	MNYSAFKGYASNWLNRKSILMKKGNGSKIALIASSGIGMYILSNEENRKELRSRCNNIKKCIDNMVYQYNNKNKIFFENLVLCDNNNSNKGFRNPLWRSEEKRPIDKMENAIIFSGSSNPLLSKKITDHLSTTLGKVNLKRFADGEVSMQFLDSIRGKDVYIIQPTCPPVNENLIELLLMISTCRRASAKKITAVIPYYGYARQDRKLSSRVPISAADVARMIEAMGVDRVVAIDLHSGQIQGFFGPRVPVDNLEAQLIGLDYFTKKNLYKPVIVSPDAGGVYRARKFQDGLNYRGMSDCGIAMLIKQRNKPNEIEKMDLVGNVYDSDVIIVDDMIDTSGTLCEAAKQLKKHGARRVFAFATHGLFSGPAIDRIENSPLEEVVVTDTVKSNKNIDNCKK…
PBANKA_1310800	A0A509APS9	40S ribosomal protein S5, putative OS=Plasmodium berghei (strain Anka) OX=5823 GN=PBANKA_1310800 PE=3 SV=1	29.9	0	0	0	27522	0	171495	29569	59574	0	0	0	18888	0	0	0	66517	1	ND	ND	ND	ND	3	11	3	14	MEDRGGFSRGFGRGARGARGVRGRGRGRGRGSAEDDLKNWVPVTKLGRLVKEGKISSIEEIYLHSLPIKEYQIIDYFFQPNECAHPLKDDVVKIMPVQKQTRAGQRTRFKAFVAIGDGNGHCGLGVKCAKEVATAIRGAIIAAKLSLIPVRRGYWGNKIGDPHTVPMKVSGKCGSVRIRLIPAPRGTQIVGAPTTKKMLNFAGIKDCFSSSCGKTKTRGNFLRAIFNALSKTYGYLTPDLWKVTKFDKSPYEEWSDFLETYQNVKGIKTII
PBANKA_0704700	A0A509AFQ4	Uncharacterized protein OS=Plasmodium berghei (strain Anka) OX=5823 GN=PBANKA_0704700 PE=4 SV=1	57.2	0	0	0	0	0	0	26929	173814	0	0	0	21268	0	0	0	55023	1	ND	ND	ND	ND	3	9	3	9	MWNIFSNEDLSLHVESENIENNISTEKAVESENKQNILMKTDTHRSCIYENNIKEIRRNIRKKYRIVQTQLLKLAKIAKQFPEIEDEENVNSNKNTKSVGKNCEEDNVTKKEGDINHPDIENSNINLEKNKSNELKQTNNEDNKTIMVSIELIKRMQKITKKIDIEKLSSKKKKKKIYIYKDEDEAFKNNLLKSNLPANYFNASSKNIDIEKSNKKIMRRRSKRLDFLKNGSNNFKNGNIRNIYEHARLLYKNDTKNHNTNHYYNYMSPYDRLKKTKTSIYNDTDNAQLTDFYVTSASNTTFNKLNYMKKNSKINHLNTIIHNDEINYNRIMSNDYSRGYSNDPSVVYGGILNSGSFIQRKGNDKMGYGIFEKKIKNNYKIGLYKYNFNNVMTNYFPEY…
PBANKA_1303700	A0A509APK6	Vesicle-associated membrane protein, putative OS=Plasmodium berghei (strain Anka) OX=5823 GN=PBANKA_1303700 PE=3 SV=1	26.9	0	0	0	0	0	99102	0	43710	0	0	0	26378	0	0	0	40660	1	ND	ND	ND	ND	3	7	3	21	MKLLRVTPEKNIEFPLVHFQAVTQVVKLENISDRKVAFKIKTTAPNNYLVRPSFGLINVRETIDIQIILQPLSDKDNISNDKFQVQCLNVDNDTTVDKQFWVTVNKSEIQDHKLVVVLNDESSSKLPHSYLPSNNNPISEMNHKNHNLNYTDTSINPDDGLKGSLPSMQRKYHELLNYCVFVDKQKVALEKENESLKNQLKAYNNNCNKFFIDSKLIPVIIVIIAIVTKSMGYW
PBANKA_1209800	A0A509AN69	Proteasome subunit beta OS=Plasmodium berghei (strain Anka) OX=5823 GN=PBANKA_1209800 PE=3 SV=1	30.6	0	31048	104879	161851	14983	328493	147212	107468	54877	0	53506	39804	0	0	0	39218	1	ND	ND	ND	ND	3	23	3	14	MMQYSTDFMSQIDNLINDEEENVNTTDELEFCIAPISVPRNFIKYAKTENKKLFDFHKGTTTLAFKFKEGIIVAVDSRASMGSFISSQNVEKIIEINKYILGTMAGGAADCFYWEKYLGQIIKIYELRNNEKISVRAASTILSNILYQYKGYGLCCGIILSGYDHTGFNMFYIDDEGKKVEGNLFSCGSGSTYAYSILDSAYDYNLSVDQAVELGRNAIYHATFRDGGSGGKVRVFYIHKNGYSKIIEGEDVYDLHYHYTNPSQKDQYVM
PBANKA_1232500	A0A509ANK3	Eukaryotic translation initiation factor 3 subunit B OS=Plasmodium berghei (strain Anka) OX=5823 GN=PBANKA_1232500 PE=3 SV=1	84.1	0	0	0	0	0	0	0	113502	0	0	0	18481	0	0	0	37097	1	ND	ND	ND	ND	3	7	3	5	MVKVEESELSDKELVDFLSDDSDDGNETLLNKKYAGKEALITLETKFPKIVTILGIPKVEEEKHSRLAEVLKKLFIRHLSAKISDSSIMNIKIYMPVDDEKKTKGICFVTFHDSFQANEAVKVLNKLKLDAKHLLTASKMDDIENIINRDERVMPINVVGFTREKIRWWLYDEKCREQFIVRYDSHFEVHWLDPLEKEPQLIYTTFKKNAPFSSVQWSNQGSYLVSFHNPGIALWGGDNFEKLIRLQHKSVKDISFSPNENYVLTWDGTPASLRNEKSICIWRVITGKLLRSFITPEYSPREKIFPHFLWGPDDKYIACIGKQKEVYIYELPSMLLLEDHEKKRTPLKYSMVKEFDWSPVDNIVAIWIPETNNTPGTLILVEIPSRKELVSRKIYDVSQ…
PBANKA_1346700	A0A509AT43	60S ribosomal protein L23, putative OS=Plasmodium berghei (strain Anka) OX=5823 GN=PBANKA_1346700 PE=3 SV=1	15	0	0	0	0	0	127900	0	41791	23441	0	0	49964	0	0	0	36634	1	ND	ND	ND	ND	3	13	3	37	MKRGRAGTLKNKMRITLSLPVGALINCCDNSGGKNLYIIAVQGFGSCLNRLPAASLGDMVLATVKKGKPDLRKKVLNAIITRQSKAWRRHEGYFIYFEDNAGVIVNPKGEMKGSAITGPVARECAELWPKLSSAASAIV
PBANKA_1317400	A0A509APT3	HSP90 co-chaperone p23, putative OS=Plasmodium berghei (strain Anka) OX=5823 GN=PBANKA_1317400 PE=3 SV=1	28.1	17461	0	62673	106890	0	195342	245863	170764	0	0	42840	0	0	0	0	30829	1	ND	ND	ND	ND	3	15	3	13	MPLFPIVLWAQKKECLYLTIELQDAEDVKIDLKEDSLYFYGIKEKNEYEFTLNFLKPINVEESKYTTKRNIKFKIIKKEKERWKSINNDGKKHWIKCDWNSWVDTDEEDKTTEYDDMAMNSFGGMGGLPDMSQFGGMGGMGGMGGMGGMGGLGGMGGMGGMGGMGDIDFSKLGNMGGDMSNLAGLGGMDQFKNMPNMNDDDSSSYGDDSSDDDDEDDDTNKSDADHSHACNDAKCNIDKDGAIHNDDAKVQEPVA
PBANKA_0205400	A0A509AEM7	Proteasome subunit beta OS=Plasmodium berghei (strain Anka) OX=5823 GN=PBANKA_0205400 PE=3 SV=1	24.5	0	10850	57229	206082	0	263887	103315	146496	13594	15742	0	153263	0	0	0	28863	1	ND	ND	ND	ND	3	19	3	21	MGSIFNYNGGCVLGMTGSQCVAIACDLRLGSNSFTTVSTNFTKIFKINDHIYVGLSGLATDIQSLYELLRYRVNLYQIRQETDMNIDCFSNMLSNILYSNRFSPYFVNPIVVGFKVNTHIDENGNKTNVYEPYLNAYDLIGAKCETSDFVVNGVSNEQLYGMCESMYIKDQDENGLFETVSQCLLSALDRDCLSGWGAEVYVLTPDKIIKKKLKARMD
PBANKA_1031900	A0A509AK44	protein-synthesizing GTPase OS=Plasmodium berghei (strain Anka) OX=5823 GN=PBANKA_1031900 PE=4 SV=1	51.2	0	0	0	32207	0	48392	30816	130129	21879	0	0	0	0	0	0	26861	1	ND	ND	ND	ND	3	8	3	11	MIINEKDKLAEQNLETLDVTKLTPLSEDVISRQATINLGTIGHVAHGKSTLVHAISGVHTVRFKHEKERNITIKLGYANAKIYKCTNPDCPPPECYKSYESSKEDDPICPRENCNSKMKLLRHVSFVDCPGHDILMATMLNGAAVMDAALLLVAGNESCPQPQTSEHLAAVEIMRLKHILILQNKVELIKEEQALKQQEEIRNFVSGTAADSAPIIPISAVLKYNIDVVCEYIVTQISIPRRDFISSPHMIVIRSFDVNKPGEDIETLQGGVAGGSILHGVLKVGDQIEIRPGIISKDDKGEITCRPIISKILSMFAENNNLKYAVPGGLIGVGTRIDPILTRADRLVGQVIGHLNKLPDCFAEIEISYYLLRRLLGVKSQDGEKNTKVAKLKNGEFLM…
PBANKA_0502200	A0A509AFY9	26S proteasome regulatory subunit p55, putative OS=Plasmodium berghei (strain Anka) OX=5823 GN=PBANKA_0502200 PE=3 SV=1	55.2	0	0	0	0	0	74501	62582	83417	0	0	0	0	0	0	0	25755	1	ND	ND	ND	ND	3	10	3	7	MEDTAAKIIGSHDSLLTDPRIAQDFSAETDELLAKAENYFKVGDFELIIEELILLEKKCRQSYDGISTSKICCFILNKYKLMENYKKVNEYLIFFNKKRGQLKRTIIDIINLCKSWIVDIQNKEEKLNLINTLCTISEGKIFVEVERSEIIRILSKIKEDDGNIEEAANILQDVHVETFISMDKRDKTEYILEQMRLVLLRKDFIRCHVISRKINPTLLNTDEFADLKLKYFLYMIQYYINEESYSDVANCYEQRFNTDSVQNDPNLWIDELKCYIIFLILSPFQEQQTKFLNLIKLQKKKLKEIPTYEQMVNDFIKQDLIEWPLLYEQELQSFYIFNDSVFVGGENRWHLFKKKVMHHNIHVISTCYSKISLQRLAQLINSTNEESENLLLELVSNKM…
PBANKA_1318100	A0A509ANA6	Aminopeptidase P, putative OS=Plasmodium berghei (strain Anka) OX=5823 GN=PBANKA_1318100 PE=3 SV=1	89.8	0	36840	0	0	0	0	0	84719	26555	0	68265	58125	0	0	0	16648	1	ND	ND	ND	ND	3	10	3	6	MRINSLIYANLLLTAIHANFFSKGNKANYVSAYINSFHHINNNNNNDNKINIEDNNKINDTNTGKRQDQLNNFFTRRFYTFHNKNQYLREEKRNSKEVNLTNNNTNSYNMESSNEQNNQMMGGDSYKERLQNLKKYMAEHNIDVYIIINSDAHNSEIINDQDKKIYYLTNYSGADGILILTKDAQIIYVNALYELQANKELDTKFFTLKVGRITNRDEIFQTIADLKFNTIAFDGKNTSVSFYEKLKDKIKIQFPDKKIQEKFIYKNSINQVVKDNNINLYVLESPLVTVPNSDVNKKPIFIYSREFGGSCAAQKIQESFDFFIENPDVDSLLLSELDEIAYLLNLRGYDYKYSPLFYSYVYLKYNRDKGIIDDIILFTKVENVQKNVLAHLERIHVKL…
PBANKA_0511900	A0A509AGK4	60S ribosomal protein L3, putative OS=Plasmodium berghei (strain Anka) OX=5823 GN=PBANKA_0511900 PE=3 SV=1	44.3	0	0	0	0	0	0	0	0	0	0	0	216738	0	0	0	227934	1	ND	ND	ND	ND	2	5	2	8	MSHRKFERPRHGSLGFLPRKRCKRLRGKIRSFPKDNKELAPHFTAFMGYKSGMSHIVREVDKPGSKLHKKEIVEACTIVECAPMVVVGMVGYRETPKGLKVLTAVWANHVSDEFRRRYYKNWYKSDKKAFTKCLNIPDTTKEKLYNRIEKYCTILRAICHTQPSKTPLRLKKAHIMEIQINGGHMKDKINFVKELLEKNIPVTNVFNTNEMIDVISVTKGHGTKGVVSRYGVKRLPRKTHRGLRKVACIGAWHPARVQFQVPRHGQKGYFHRTERNKKIYRIGLKKDKNNASTDADITEKKITPMGGFPHYGVVNEDFILLKGCISGTKKRPITLRKTLVPQVSRDALSQVSLKFIDTSSKLGHGRFQTSEEKIKYYGPLKKDLKA
PBANKA_1432200	A0A509B0E4	Male development gene 1 OS=Plasmodium berghei (strain Anka) OX=5823 GN=PBANKA_1432200 PE=4 SV=1	24.3	0	0	0	0	0	0	0	75587	0	0	0	261198	0	0	0	226065	1	ND	ND	ND	ND	2	8	2	14	MKCINIPTSTIGCLLLFFLSSQNAQYECMNIKGSSNNGSGGKANFNVQDGKLNTKWSDNGYSFMDLIKNGYVKNKDLDDIKDDLASELATKIQNSISKYIKEDNDEDELNDDDIKNLKIYVKEISGYVGLKAADLLDKNLESALKPLIENKSFDKSESKLSNEGTSSFRFNNEIIDDEDPEEEIDHFADDLTDKYEVKQNENLEQYEKDINPHH
PBANKA_1402600	A0A509APZ1	DNA ligase OS=Plasmodium berghei (strain Anka) OX=5823 GN=PBANKA_1402600 PE=3 SV=1	102.6	0	0	0	33083	0	0	0	0	0	0	31704	222247	0	0	0	205966	1	ND	ND	ND	ND	2	6	2	2	MKLLLLILLTKMFFCKIKRYMRTEYNYVTPFMKSKLFHNYKNKFNVIILKNIRNNVPNRNDKYLKCLSFPKKLDGGEQCDTKIEETHVKNEEKEASKRKNTNDDSAKTKKSKVKNENEIKKGSLFNCKVYEDEKISDLTSPKFNPANFDISNLCLSEKDKIKHKFKDSLLFTFLTNTFNQIEELKGSGAGSKKNVAIILSNVFRVLIYYSPNDLIPAVYITLNKVAPDYQNVEAGVGEALILKTMSEAYSRTETSIKKDLQQIEDLGIIAESCSCKMRTIFPLPRLTIQSVFNELKSIPNISGSNSQQKKREVIKKLLVSAKTSEAKYIVRFLQQRLRIGVNSATVLQALAYAFVLTRPEIPENIIKDGKMMNEKLLNEQTMVKGDKDNCNDGTTEVKN…
PBANKA_0501300	A0A509ADQ6	DNA polymerase OS=Plasmodium berghei (strain Anka) OX=5823 GN=PBANKA_0501300 PE=3 SV=1	126.5	0	0	0	0	0	0	0	69566	0	0	0	201348	0	0	0	178929	1	ND	ND	ND	ND	2	4	2	2	MEKNIFSATNVIPYGPLYDKAKNVKNNDQDENYHIVEEYEKLLKIYERPNPYDSNGSLKFSSNDDLLLFQIDLDYTVENIFRNVIYSNEGSTNNRDSKCDSIYESYKIILGKEKNFISVPIIRIYSITNCGYSVVVNVHNFFPYFYVEKPNGFNNDDMIKLESMLNETLSLNNQFKMYENKILKIEAVKTESIMYFKKSGKTDFLKITVLLPKMVPSLKKYFESGINVNSKHFGGIVYEANLPFILRYIIDKKITGSSWIKCEKNSYIIRSKNKQSSNCTFEIDIHYENIEPMALENEYQKIPKLRILSFDIECIKLDGKGFPEAKTDPIIQISSILYLQGDPIENCAKFIFTLLECASIPGSNVIWFNDEKTMLEAWNEFVIRIDPDFLTGYNIINFD…
PBANKA_1365500	A0A509AT96	Exported protein IBIS1 OS=Plasmodium berghei (strain Anka) OX=5823 GN=PBANKA_1365500 PE=4 SV=1	37.4	0	0	20409	0	0	0	22105	233818	0	32890	250993	253362	0	0	0	121378	1	ND	ND	ND	ND	2	13	2	8	MKKGNNGNFSMARNCECKKIDNDDMVSSTRYSNKFGEKFNLISCTKLFALGMLFLICKNCDNSTQTTSAYQEYQYNGLILGKSRILSELDQNKDQNLGYKTQSYEDSSTENASTSYMSTLKTDEESNTAGEDRKEDNNDAAFIGKKSTEKKPHIDRISSTLNPESTDRRKSSDEQKSSNDKNIFKDVDDLINGIKSRYQDITNKIKSPEFQNECKGYINVAKEMIEDHRNHAMRFVSRNLNSLGIDQIFNDEHGGYAFLAKIMLTKVFVDNLFVPNFLKNNSTILSTIVYFLIISFIVSNYLDATQNNERERKNLNKSNIFCRAKPM
PBANKA_1234200	A0A509ANV8	40S ribosomal protein S24 OS=Plasmodium berghei (strain Anka) OX=5823 GN=PBANKA_1234200 PE=3 SV=1	15.3	0	0	0	28485	0	189652	0	42818	100645	0	0	98100	0	0	0	120486	1	ND	ND	ND	ND	2	11	2	20	MADQFTVRVKKYMSNPLLRRKQFALEILHPNKGTISKKDVKERLAKMYKLNNVNTIVLFGFKALFGGGRTKGFGLIYNSVDAVKKFEKKYRQIREGLITKENKPGRRAAKELKNRRKKVRGTAKTKVSGGKKK
PBANKA_0830200	A0A509AKZ5	High molecular weight rhoptry protein 2 OS=Plasmodium berghei (strain Anka) OX=5823 GN=PBANKA_0830200 PE=4 SV=1	159.9	0	0	0	0	0	0	0	15872	0	0	0	115332	0	0	0	88112	1	ND	ND	ND	ND	2	5	2	2	MVKLSGIILLSLVWLKLNNSYEIRERISNKNNPDDDILKINVEEDKKKICNNILIFLNADDILTENNKYSFMGKCEKLIDDIKNENNSPDITNEFALSLMHMRSKHTITSSINNNKALKNIIISLDKSMSEPEVINRVKHIIRFNKYLAGKLSYKNIGESLVLRVSSHERMRRSKRELVRNILKDFHIYGLYFDLKSENSTLLKNQESESLINIKNEKLCQTYIHLCQKFYEQTSVYYKIKTILNEVIKHTKDNYALEGEYDISKLFSLENSISQVSQHSDHMLTNESLIYDMNKSNYIKYNQLIHEVIPEDGNIEEQVKKGNGRYIVVVKNLKKAIGNSENYDNIMNIIKKYLINVTKNNKEILDMVMELGNEDIEQFMTQLVFFIHYGFLLITEDKH…
PBANKA_0510900	A0A509AGJ2	40S ribosomal protein SA OS=Plasmodium berghei (strain Anka) OX=5823 GN=PBANKA_0510900 PE=3 SV=1	29.7	0	0	0	0	0	141585	39062	0	21775	0	0	0	0	0	0	84308	1	ND	ND	ND	ND	2	7	2	13	MSNKKVQSPKEESIAKMLICKVHIGTKNLENKMKRYVYTRAKDGVHIINLAKTYEKLQLAARVIVAVSNPADVVVVSARPFGSRAVLKFAQYTGAQAIAGRWTPGMLTNQIIQKFIEPRLLIVTDPRTDAQSVKESAYANIPVIALCDSDSPLEHVDIAIPCNNKGKESIALMYWLLAQEVLYLKGSIPRSQAWDVMVDMFLWRDPEQFELKNLANEEAAPTAPHLADNQYATEAPYDDWNKKDDWNDNANEEWKNPITVDEW
PBANKA_1035200	A0A509ANB6	LCCL domain-containing protein OS=Plasmodium berghei (strain Anka) OX=5823 GN=PBANKA_1035200 PE=4 SV=1	148.1	0	0	0	0	0	0	0	0	0	0	0	128074	0	0	0	79851	1	ND	ND	ND	ND	2	4	2	2	MRIYNWVSCGFILLQFFMNVYGKEWCKAKFEYGMSDYAECQKEGDNLTNYMIEIIPAKANNIDLYSDVSIVLSNSQGINTKEIIIGSEKEGLFRKIYSVRKDIDNPEYVHVKLNSKINNNRNWKCKKIKIWKDYKYWTFDCIGILNEEKREATYFLSGNKLYTAYVQTGKDIESGTTGIIDIILLGNNNKRSNTKMLHEGFISGGLKKIKFQASDVGNLENIILINNSYNDPWYCDFVKIKSDDSKIYIFNVKSWIGYPYNNKIKININTNNIDGNAKDIDCHIRANDLIDTTKSLNNNFVLQNKVHIFKVRCPQNCHNSEFSIIEGTSIHPASTSICAAAIYDGSLTESGGEIIVTITKGLNYYYAIDEAYNNLKAIEFSTKGDESDENNFSFYTYHL…
PBANKA_0707400	A0A509AI09	RNA-binding protein, putative OS=Plasmodium berghei (strain Anka) OX=5823 GN=PBANKA_0707400 PE=4 SV=1	32.9	0	0	0	0	0	19420	0	20802	0	0	0	21011	0	0	0	79772	1	ND	ND	ND	ND	2	5	2	13	MSIANSSKIFIGSIPKDVTEDELKTEVAKYGNVVQVYYVPATAQSPRGWAFITYEQRSEAYKAIESLDYKCIFPNSQRPLDVRFASYKHNNTNDMQVNSINKNIWQKHVTSDGHPYYYNSVTGHSQWEKPKEITPVNYPVKNTVASFGPPGANVFVFHLPSHWTDMELYQHFQHFGYVVSARIQRDANGRNKGYGFVSFNNPESALNAIKGMHGFYVSGKHLKVQLKKGEEHYIQLNSPAQPQLTPAQPYTVQQPIMGNHPQPYMTHLMYGGMDSPNQIRYNNYSLSR
PBANKA_1218900	A0A509AUA3	Elongation factor 1-delta, putative OS=Plasmodium berghei (strain Anka) OX=5823 GN=PBANKA_1218900 PE=3 SV=1	17.6	0	0	75247	128565	0	265145	215788	191939	62839	0	0	112921	0	0	0	67645	1	ND	ND	ND	ND	2	13	2	27	MANTYDELYVPLSYYILHNDGNIDNSGTSQGAKKGNKKKEVGKSSLIIDIKPYGEDTNLDEVLKLVKEIEMEGLTWGKAHKKTPFAFGLFKLQVSCIIVDDLVNTDELIELIENVGLSDEDCKKKKELQEQMNEDEDVEDTIEGLVQSAEIISFNKL
PBANKA_0712100	A0A509AHF5	DNA helicase, putative OS=Plasmodium berghei (strain Anka) OX=5823 GN=PBANKA_0712100 PE=4 SV=1	120.7	0	0	0	0	0	0	0	0	0	0	0	27883	0	0	0	66732	1	ND	ND	ND	ND	2	3	2	2	MDVCEFIDPIRKRKITNNLIDFDKYVYKEKSDKCEEKQSNEYVIKKKKKKKKLKRVLDSSDSDNSDKENIKKEYKNECEKNKKNNDEFLCKSYDNSITNDNEIEEKKEYERNLKKLYNCLLGSVKIKNKIIKYFTQNAIEKRQDIIKEFVKGSFRINNYDANFEDFEKNVDTFHKLKKYQKCGVYWLYILYKEKKNGILADEMGLGKTAQTCVFLDYMYKTNKLQNKTIIVTPTSLLKNWDNEIDMWCPYLKNHKIIYYGNQNERKYLAYDIFTNKKKDNNNNNNNAIHLIITSINMLTGKNDAAYFRQIRKYDYLIFDEAHFLKNKNSLIYKKLQKKIIFSNKILLTGSPIQNKTQELTNLLLFLMPHIFTEHNINSAMNAFLKLYQEIIEKKNKFDN…
PBANKA_0520200	A0A509AEI5	ADP/ATP translocase OS=Plasmodium berghei (strain Anka) OX=5823 GN=PBANKA_0520200 PE=3 SV=1	33.8	0	0	0	0	0	53851	0	48782	0	0	11612	54892	0	0	0	64990	1	ND	ND	ND	ND	2	5	2	8	MSGDFKTSFAADFLMGGVSAAISKTVVAPIERVKMLIQTQDSIPEIKSGQVERYSGLINCFKRVSQEQGVTSLWRGNLANVIRYFPTQAFNFAFKDYFKNIFPRYDQNTEFAKFFCVNVLSGATAGAISLLIVYPLDFARTRLASDIGKGKDRQFNGLFDCLKKIYKQTGIISLYSGFGISVTGIIVYRGSYFGLYDSAKAILFNNDKNTNIILKWSVAQSVTILAGLISYPFDTVRRRMMMMSGRKAKEDIQYKNTIDCWVKILKHEGIRGFFKGAWANVIRGAGGALVLVFYDELQRLL
PBANKA_1135700	A0A509APW5	CUGBP Elav-like family member 1, putative OS=Plasmodium berghei (strain Anka) OX=5823 GN=PBANKA_1135700 PE=4 SV=1	57.2	0	0	0	0	0	0	0	82076	0	0	0	47287	0	0	0	51316	1	ND	ND	ND	ND	2	3	2	5	MDNNDNIDSNDNSSDTNTANYNQGKNDIISEEIDFTKEDNELSGSTKNSKSKNDSSAKGKSSDKDDINMDYSDHTFPCHPAPPVSIKLFIGRVPKNYEEEQLRPIFEEFGIVNEVVIIRDKITNIHKSSAFVKMASISEADNAIRSLNNQRTLDQQLGSLQVKYASGEVMKLGFPQNVESGVDQAKLFIGSLPKNITEESIKDMFSVYGSVEEVFIMKDNSTGLGKGCSFVKFAYKEQALYAISSLNGKKTLEGCNRPVEVRFAEPKSSKQSQSQLGIQPIQNAPHGISPQAHPGTPNNINYGNNFGVNNNYPRQVGVWKEYYSGEGRPYYYNEQTNTTQWEMPKEFETLFMNNNPNIHNLSDSSGPPGANLFIFHVPNEWQQTDLIQAFSPFGELLSA…
PBANKA_0601900	A0A509AGR9	High mobility group protein B1, putative OS=Plasmodium berghei (strain Anka) OX=5823 GN=PBANKA_0601900 PE=4 SV=1	12.4	0	0	0	0	0	0	0	29973	0	0	0	58639	0	0	0	47720	1	ND	ND	ND	ND	2	3	2	21	MDGMKKFKDMKMGGKEVKKRRKNKKDPHAPKRSLSAYMFFAKEKRAEIITRDPSLSKDVATVGKMIGEAWNKLDEREKAPYEKKAQEDKIRYEKEKMEYAKSKMK
PBANKA_1417900	A0A509AU54	Uncharacterized protein OS=Plasmodium berghei (strain Anka) OX=5823 GN=PBANKA_1417900 PE=4 SV=1	124.1	0	0	0	0	0	0	0	0	0	0	0	0	0	0	0	43937	1	ND	ND	ND	ND	2	2	2	3	MHIMENTAKKKSNDKKEKKKKNDIKEKILSGKAVLSFDEEIEFNKCCSIGANFVEDTNEIKKKNISDANNNPLKGTVLNKKKAQKKNEKEQIDNINKNYKDKSKKSCTLENKTSNNKSDNIEEANICNINNNDNSNQHIYKINEFESNLSKNNTYNLLDSSTNSSASPRICRNNNDLKKKNSIKIGKLENSNNIINIEEDNGEFNKWIELMPNINSQIETILKNQLPCYNILNNIKRINKIRNISFNENNEMLNSIEKSNLMFNSVNISSKEKYIIRFLCEGSICNLTELVDLLYYVLNNNELTYDMLPVKFELDNNTKMEKSDFLIINDIEKKNIKSNDCSPIVEIDKENKITDNNISPIENRNINMNNENDISIGNLSDDEYLFDDAENEKLPFNNI…
PBANKA_0809100	A0A509AIC9	Proteasome activator 28 subunit beta, putative OS=Plasmodium berghei (strain Anka) OX=5823 GN=PBANKA_0809100 PE=3 SV=1	32.8	0	0	0	45544	0	77360	46739	81307	0	0	41006	89537	0	0	0	43842	1	ND	ND	ND	ND	2	9	2	8	MESLISKIDKIDPSNPKIKEEYNKFKCDITKQTIESLKERIPERIIFFNNLVNVNSEPGAILNVKDLDSTSYKYKIEQFEENARKKAKVNNSNSKENKSDKNNNDTNIKNFPNNENSKIIINDQLVYTHYAPSHKQIYDELEKIKSYASELIEMIGNIKLWIQLNVPRIEDGNNFGVGIQEEAIQELARVEESAFNLYDAIVKYYMERAKIFTKVIKYPNVLDYQEAIREIDEKEWIHIKITIIDMRNNYIMLYDLLCKNWEKVVKPKNEDAHNRMTF
PBANKA_1122800	A0A509AP87	Ribonuclease OS=Plasmodium berghei (strain Anka) OX=5823 GN=PBANKA_1122800 PE=3 SV=1	33.3	0	0	0	14544	0	0	15120	33746	0	0	14279	93427	0	0	0	41841	1	ND	ND	ND	ND	2	7	2	10	MEPILIDNLYEFGNEEVRLGIDEAGRGPVLGPMVYSGFYCKKEDEKLLKEMKIDDSKKITEHDREKMFYKLNNSKLPFAWRVHILMPQDISAKMLKRQKYNLNEISHDTAISIIQHVLNRGCNLTEVFVDTVGKASVYEEKLQKLFPNIKCVVKEKADSLYPVVSAASICAKVTRDFLIKKWKYEEHIINIDKGFGSGYPGDPVTKNFLKNNFDPIFGFPSIVRFSWSTADTMLENLGEKIEWYDEEESNNSKAMKRKIPFDYSKLQKPLINRSQFYAKNGLDLVSNL
PBANKA_0811300	A0A509AKR9	Exportin-7, putative OS=Plasmodium berghei (strain Anka) OX=5823 GN=PBANKA_0811300 PE=3 SV=1	134.6	0	0	0	0	0	0	0	36801	0	0	0	65882	0	0	0	40495	1	ND	ND	ND	ND	2	5	2	2	MSEAELQQLQVLCEAMYCGNKEEQNQAHTILLPLVSNVGNVSKLKNILGSTTHVHTLIFTTSGLLQLITNEWNKIENNEKEELKEFVISYLYNKGVELLNLSSNILGNFVRLYVRIVKLSWLENTNYALITKQVEYFLNSVTSHWIIGLYIYAALIEDMHPQCGVNSAKSRRCAISFRDYVLKDIFKVGIETLEEFVKGSIRIELRVEENRLLMKVLELIYNSLSFDFMGTMINDESSDENISLMIPQSWDIFNEKNIPKLFFDMYEICMSEVDDIRNCCGKYCIRSLILLGSLRKTFFSNEKQKIRYMNEFLGGINKIIEKKIGLHDEDCFHELCRLIGKIDTSIRLQELSTYSNFLSWCNNIYLFTMDGMKNWKYLCNSKHYLLGIWSNMLNIIPPK…
PBANKA_1348100	A0A509APB4	AMMECR1 domain-containing protein OS=Plasmodium berghei (strain Anka) OX=5823 GN=PBANKA_1348100 PE=4 SV=1	27.1	0	0	0	0	0	32082	0	40633	0	0	0	0	0	0	0	24927	1	ND	ND	ND	ND	2	3	2	14	MSSPSTIFENENISQDKSEVVSKLMENKNIVCSWCFDILKNKLENKKLNYVPPIIKTLHEKGFKIAFFVKWMKLNNVKDLGSYEYDAYDLKGCIGCLNEIDLTELQYYTLESSLNDTRFNPITLRDLPYLIVTITYIFNFEKCEHVYDWVIGKHGIKINFTINNKRYSSTFLPDVATEHNFDHKTTITHLIRKANYRGIINDELLNIIQTERYQGVNCSLTYSDYEKIKKS
PBANKA_1440700	A0A509AV22	Ubiquitin-activating enzyme E1, putative OS=Plasmodium berghei (strain Anka) OX=5823 GN=PBANKA_1440700 PE=3 SV=1	128.9	0	0	0	37865	0	0	35255	24338	0	0	0	0	0	0	0	22697	1	ND	ND	ND	ND	2	4	2	3	MQSNNPLKKQRTYEDIDLKGIEKNRNEENSIKLEKMEENQIDANLYSRQLGTYGFELMNKLIKMNILIINVKGVGLECAKNIILSGPKSVCIYDNDICEISDIGVNFYINENHVENKICRSNAVLSNLQELNNYVHVYNYTEDLNNSKFIEQFDVVVCCDTKDSDIIKYNNLIRSIETKNIAFLSCNVYGLCGYIFNDFGNNFICYDKDGENIKSCNISKISKDVNGIVSFDFDKSSPFQNGDFVKFTNVEGMTEINGKIYQIKNLKKYTFTIGDTSKFSDYIKGGECTQIKTNLKLNFKPYEYIKNKPLFGLSSDNSEQSNNVKIVDDKKGGKIIFEKEIFPTSFIISDYSKLNLSNYLHYAIQGLKWYEIEYNCLPENNQNDEFEKIYKKACDLNSK…
PBANKA_1355500	A0A509AQI2	Casein kinase II subunit beta OS=Plasmodium berghei (strain Anka) OX=5823 GN=PBANKA_1355500 PE=3 SV=1	40.5	0	0	0	31266	0	98075	59804	93596	0	0	0	0	0	0	0	21850	1	ND	ND	ND	ND	2	7	2	6	MDHISDDSLNNTFQEEDNQEEDVELSGEYFDSPIRSDYKEEEYDHDENEHISGLEVKDEGDEQGEEEEEEEEEDEEEEDEDEEEEEDDDDDDDDDDDDDDYDDDDEYDEDDFNEATVSWIEWFCQLKQNIFLVEVDEDFIRDEFNLIGLQNKVPHFKKLLKIILDEDDDDDDDDDDDDYDEDDDEINRRSEELYKNKDIYEQNAACLYGLIHSRFILTSKGLALMREKYKSGIYGTCPSIYCDNAKLLPTAISEVPKFLSPLLYCPRCCETYYPHKNSLINQLDGSYFGTSFASFFALSFNILSDKKKNYYTPQICGFTINRDIRENMYMEMNKDNSESSEESS
PBANKA_0720300	A0A509AN29	Eukaryotic translation initiation factor 3 subunit M OS=Plasmodium berghei (strain Anka) OX=5823 GN=PBANKA_0720300 PE=3 SV=1	51.4	0	0	0	0	0	113225	0	79887	0	0	0	21742	0	0	0	17798	1	ND	ND	ND	ND	2	8	2	5	MSVYIQLTHDLSGTVTAVTIGDWILGILKQKNIQEYEVFFKKFLNIYQNQDKESETNNRSEIFSLLLSASDCVFETLVETKKNKKINVIIDNKECVKSFNEFYKEVEEYFVILISILQLEFKSVDDLNNATNNFIKAIKNYNVFPELRLKILQLLYNSFNVNFSFRFPTFIAILQFSSQNNIFHAILPYIKSIDDWIKEWNISNHEKRQIYLIVAEELKKLKKYEDSYKHLKKHIYYFQKESKEILNHASTIKASVELVVDSINLNNNIFFHEIVNLDAIQNLQYIEEHKPIYELLTIFYKYNIQEFLTFKETYGNKFFTKYNIDLENSENKIYLLSIISLFKDNKVQNIQYISEQLNINMLKVEKILVSAIGSDIIDAKIDQINKTVHMKTTILRQFD…
PBANKA_0824700	A0A509AIW3	Thioredoxin reductase, putative OS=Plasmodium berghei (strain Anka) OX=5823 GN=PBANKA_0824700 PE=3 SV=1	71.4	0	47802	0	86325	0	55340	0	140288	0	0	0	42013	0	0	0	17313	1	ND	ND	ND	ND	2	12	2	4	MNPALVSYTFIPKKYLKISKRYITRYSKIYGQFNTNKSIYFQRIYSNKFLNNNINIIHSNCGIFFCNCHLLFSRRFTILSCNNTITCEKNILKNKSIKIMCNDNKRNPINDNFNVNDNNKTNNSQTNNIAIKEENMDSSNYDYDYIVIGGGPGGMASAKEAASHGAKVLLFDFVKPSSQGTKWGIGGTCVNVGCVPKKLMHYAGNMGTLFKNDSDKYGWECNNLKHDWNKLVSTVQSHIRSLNFSYMIGLKSSKVKYINGLAKLKNKNTVSYYLKGDSSKEDCVTGKYILIATGCRPNIPDDVIGAKELSITSDDIFSLKNDPGKTLVVGASYVALECAGFLNSLGYDTTVSVRSIILRGFDQQCANKIKLYMEEQGVTFMCGILPKKLTKENDKILVH…
PBANKA_0937700	A0A509AK89	60S ribosomal protein L36 OS=Plasmodium berghei (strain Anka) OX=5823 GN=PBANKA_0937700 PE=3 SV=1	12.7	0	0	0	0	0	0	0	0	0	0	0	47889	144724	0	0	0	1	ND	ND	ND	ND	2	3	2	19	MGRKSTIKPSTGIAVGFNSGHIVTKRSVKKSIKKKKVPKNKDLINDVVREIAGFSPYEKRLIELIKVGTSAATKRSLKYAKKKLGTHKRGKAKREEIQKIVMMQRRKAATDKH
PBANKA_1117000	A0A509AM25	Histone H2A OS=Plasmodium berghei (strain Anka) OX=5823 GN=PBANKA_1117000 PE=3 SV=1	14.2	0	0	0	0	0	87939	0	0	0	0	0	0	0	0	27894	0	1	ND	ND	ND	ND	2	11	1	24	MSAKGKTGRKKAVKGTSNSAKAGLQFPVGRIGRYLKKGKYAKRVGAGAPVYLAAVLEYLCAEILELAGNAARDNKKSRITPRHIQLAVRNDEELNKFLAGVTFASGGVLPNIHNVLLPKKSQLKSGATANQDY
PBANKA_1010800	A0A509AJJ9	CCR4-associated factor 16, putative OS=Plasmodium berghei (strain Anka) OX=5823 GN=PBANKA_1010800 PE=4 SV=1	29.7	0	19605	49253	172883	0	308640	123210	140472	23587	13845	24048	0	0	0	0	0	0	ND	ND	ND	ND	8	21	8	34	MDSIIINNLTYNYYHPLRKTRIQALSDLNLVFEKGMRILVCGKNGAGKSTLLSILAGKKLVKEESVSVFNKPVFHDLSLNDRIGYVGEWWNDEYAMNITIKSMFAQYADSKRYKKLMKLFDIDDSKVISGISKGQKKKVQIVSTIIKRKDIYIFDEAAESLDLISRKVLLDFLKNESIKYKCIIIYSTHIFDCMDKWSTHVLYLAKGSISFFSDINSIVSDNKYISMADFVFDNMMDETNKNDKTYNIEEILNLDSE
PBANKA_0308600	A0A509AF93	asparagine--tRNA ligase OS=Plasmodium berghei (strain Anka) OX=5823 GN=PBANKA_0308600 PE=3 SV=1	66.4	0	0	0	84186	0	136223	62760	224696	19290	0	48711	0	0	0	0	0	0	ND	ND	ND	ND	7	32	7	15	MAIEVDEETLKIAKEFQKKNEEEIKSKKLKPESIKLDNPSSNLIKINEASCRGRIKICNLLNVPISEVEYNNKDKIEKNKYIDQLVVVCGWSKAVRKQGGGRFCFVNLNDGSCHLNLQIVVNQNIDNYDKLLKCGIGCCFRFTGTLILSPVQNTEKKGLLNENVELTLTDNSIHSFEIYGENLDPQKYPLSKKNHGKEFLREVAHLRPRSYFISSVMRIRNALMLSTHLFFQSRGFICIHTPLITASDCEGGGEMFTVTTLFNEHGDISSIPKTKKKINNNETGKREDKNTNELETNNTNQYIVDFKKDFFSKQAFLTVSGQLSLENLCSSMGDVYTFGPTFRAENSHTSRHLAEFWMIEPEMAFADIYDNMELAEAYIKYCIRYVLNNNFHDIYYFEE…
PBANKA_1362900	A0A509AT80	Lysine--tRNA ligase OS=Plasmodium berghei (strain Anka) OX=5823 GN=PBANKA_1362900 PE=3 SV=1	67.1	0	44065	0	45627	0	0	163881	126351	0	0	0	0	0	0	0	0	0	ND	ND	ND	ND	7	18	7	12	MLTLFLSILKNKNFNRQFFFNNKFLTLFEHNFKANIIKVHFTTMTEKREHVTSNQKKTNPPPVDASKEDETELDPRLYYENRSKLILNQQEKGINTYPHKFERTISIPDFIEKYKNLENGEHLEQTILNITGRIMRVSSSGQKLRFFDLVGDGKRIQVLANYSFHDKEKSNFVECYDKIKRGDIVGIIGFPGKSKKGELSIFPKETILLSPCLHMLPMKYGLKDTEIRYRQRYLDLLINESTRNVFITRTKIINFLRNFLNDQGFMEVETPSMNLMAGGASARPFITHHNDLDLDLYLRIATELPLKMLIVGGLDKVYEIGKVFRNEGIDNTHNPEFTSCEFYWAYADYYDLIKWSENFFSKLVYHLFGSYKILYNKDGPEKDPIEIDFTPPYPKISLV…
PBANKA_1010500	A0A509AMQ1	Hsp70/Hsp90 organizing protein, putative OS=Plasmodium berghei (strain Anka) OX=5823 GN=PBANKA_1010500 PE=4 SV=1	65.6	0	0	0	41072	0	178175	168658	279861	0	0	0	35962	0	0	0	0	0	ND	ND	ND	ND	7	19	7	15	MINKEEAQRFKELGNKCFQEGKFEDSVKYFSDAIKNDPSDHVLYSNLSGAYSSLGRFYEALESANKCINIKNDWPKGYIRKACAEHGLRQLDNSEKTYLEGLKLDPNNKSLKDGLEKVRKDKEMENMEYINHINNIINNDARLKSYKEENSNYPTELLNTIKAINANPMNIRFILSSCNPKISEGVEKFFGIKFNDEASYEAERERQRKKEEEEKKEKERKMKEEEKKKNRTPEEILGEEHKLKGNDFYKQKKFEEALKEYDEAIKVNPNDIMYYYNKAAVYLEMKSYEKCIETCIYAIENRYNFKAEFSQVAKVYNRLAIGYINIKNYDKAIEAYRKSLVEDNNRATRNALKELERKKEKEEREAYIDPVKAEEHKNKGNEFFKNNDFPNAKKEYDEA…
PBANKA_1242300	A0A509AV96	Hsc70-interacting protein, putative OS=Plasmodium berghei (strain Anka) OX=5823 GN=PBANKA_1242300 PE=4 SV=1	47.7	0	0	0	103785	0	68854	75121	292778	0	0	0	43506	0	0	0	0	0	ND	ND	ND	ND	6	15	6	22	MDIEKIEDLKKFVASCEENPSILLKPELSFFKDFIESFGGKIKKDKMGYEKMKSEDSTEEKSDEEEEDEEEEEEEEEDDDPEKLELIKEEAVECPPLAPIIEGELSEEQIEEICKLKEEAVDLVENKKYEEALEKYNKIISFGNPSAMIYTKRASILLNLKRPKACIRDCTEALNLNVDSANAYKIRAKAYRYLGKWEFAHADMEQGQKIDYDENLWDMQKLIQEKYKKIYEKRRYKINKEEEKQRLKREKELKKKLAAKKKAEKMYKENNKRENYDSDSSDSSYSEPDFSGDFPGGMPGGMPGMPGGMGGMGGMPGMPGGFPGMPGGMPGGMPGGMGGMPGMPGGMPGGMGGMPGMPGGMPDLNSPEMKELFNNPQFFQMMQNMMSNPDLINKYASDP…
PBANKA_1450200	A0A509B1C2	glycine hydroxymethyltransferase OS=Plasmodium berghei (strain Anka) OX=5823 GN=PBANKA_1450200 PE=3 SV=1	49.6	0	36309	0	116760	0	79645	80973	132015	0	0	0	104913	0	0	0	0	0	ND	ND	ND	ND	6	20	6	13	MFNNEPLEKSDKELYSILLDEEKRQKETINLIASENLINTSIKECLGHVVSNKYSEGYPKKRYYGGNDYIDKIEELCCKRALEAFNLNPDEWGVNVQSLSGSAANVQALYALVGIKGKILGMHLCSGGHLTHGFFDEKKKVSITSDMFESRLYKSNSEGYIDLDVVREMALSFKPNVIICGYSSYPRDIDYKRFREIADEVNAYLLADIAHISSFVACGNLNNPFLYADVVTTTTHKILRGPRSAIIFFNKKRNYGIEQKINSSVFPSFQGGPHNNKIAAVACQLKEVKTESFKNYTKQVLENSKALAKYLMNNNIDLVTNGTDNHIVLIDLRKYGITGSKLQEVCNTINISINKNTIPSDNDCVSPNGVRLGTPAMTTRGAKENDMEFIANTLLKAIK…
PBANKA_1309900	A0A509APA2	leucyl aminopeptidase OS=Plasmodium berghei (strain Anka) OX=5823 GN=PBANKA_1309900 PE=3 SV=1	72	0	70173	30483	46967	0	126600	76457	107134	76731	0	18986	116647	0	0	0	0	0	ND	ND	ND	ND	6	33	6	11	MYLTRLNINFVDKIFENKFYKNIIKRYYFYNIKHSQKKFFFSFFISNSIKNKNNYNSDCREFLTFNTYHYQKTPKYKIESLNFSKTIKKFYSTNNIKNFNISFSKFEKMSLKVPQVINLDPTVLPVNYTTPIDDIEIVLKDGIKESCNFDDGLAIFLVNSKSEKDNGNTKISSQIKDSKINEFLSKNDDIFNGKLGTFKSFYMANEKNKYINLSFIRCGTIDEEMTEFEIRKIVSSLVQILHDNKSVSTSIIFEIGINESLFRFFLETVFYEYVVDERFKSNDNKSSGNSENMKNLQIFLRNYNNNYNKQVKKSRTYFMGTYFASQLISAPSNYCNPVSLANVSVELAEKLNLECKILGIKELENLKMGAYLSVGKGSMYPNRFIHLTYKGKGDIKKKI…
PBANKA_1213600	A0A509AQM3	cysteine--tRNA ligase OS=Plasmodium berghei (strain Anka) OX=5823 GN=PBANKA_1213600 PE=3 SV=1	78.3	0	0	0	199721	0	79386	120827	120866	0	0	12950	0	0	0	0	0	0	ND	ND	ND	ND	5	16	5	9	MKLFKFLCLTLFSTLYRKTLFCSSININSYYNRKNKTTKNISLKNQFNKKGKFSQKGMLFIPKYLHCKNNFIKNKYIIIKKVFHSSMEANSNLPKWTMPSKENKTITNLMVNNSLTHSKVEFVPQEGNTIKWYACGPTVYDAAHLGHARTYVSFDIIRRILTNYFKYDVFMVINITDIDDKIIKRSEEEKVNFTELARKWEYEFWEDMKSLNVLLPSSITRVSEYVNEIIKFIEKIIENKYAYVSSEGSVYFDIDAFKKNPNHFYARMEPMSVKDETKILEGEGDLGVISKNKKNSYDFALWKSSKPNEPSWDSPWGKGRPGWHIECSTMASNILGKVLDIHSGGVDLRFPHHDNELAQSEAFFDHSQWVNYFLHSGHLHIEGLKMSKSLKNFITIKNM…
PBANKA_1410400	A0A509ARF6	H(+)-transporting two-sector ATPase OS=Plasmodium berghei (strain Anka) OX=5823 GN=PBANKA_1410400 PE=3 SV=1	68.3	0	131035	21315	81978	0	38901	154778	68952	0	0	0	0	0	0	0	0	0	ND	ND	ND	ND	5	24	5	11	MTKNVAENEEPGIVYKVAGSLVIAENMSGTRMYELAKVGWNKLVGEIIRLEGNYAYIQVYEDTSGLSVGDPVTKTGNALSVELGPGILNNIYDGIQRPLERIANACGDVYIFKGIDMTALDHEKQWDFYGNKELKLNDIVTGGDIFGYVDENKLFKEHKIMAPPNAKGRLTYIAPDGSYSLKDKIFELEYQGKKYTYGLSHLWPVRDPRPVLEKVTGDTLLLTGQRVLDSLFPTVQGGTCAIPGAFGCGKTCVSQALSKYSNSEVIIYVGCGERGNEMAEILSDFPELTTRVGNEDIGIMQRTCLVANTSNMPVAAREASIYTGITLCEYFRDMGYNATMMADSTSRWAEALREISGRLAEMPADSGYPAYLGARLASFYERAGKVKCIGSPSRSGSIT…
PBANKA_1364300	A0A509AR17	glycerol kinase OS=Plasmodium berghei (strain Anka) OX=5823 GN=PBANKA_1364300 PE=3 SV=1	56.5	0	0	0	24573	0	0	13512	62440	0	0	0	0	0	0	0	0	0	ND	ND	ND	ND	4	7	4	11	MNIILSIDQSTQSTKVIFFDEELKVLHMNSLNHEQKCFKPGWYEHDPEEIIANLYKLMNEGINVLKEKYKTVVIKCIGITNQRETVIIWDKETGKPLYNAIVWLDTRVENLVTEFSKKYNNDYFQKKTGTYFNTYFSAFKILWLIKNNKTIKEKVKNGTAMIGNINTWLIYNLTKGNCYTDVTNASRTLLMDISTLQWDPEMCKMFGITNMYALPEIKCNCYNFGLVKSEKVPDYSNVPITGCIGDQQSACIGQAIFDEGEAKCTYGTGVFLLVNTGNKIVYSSCGLITTVCYKFNDDDKPNYALEGSIGTAGSGVSWLENVNLIKDTSEVNDIMENCKDTEGVVFVPAFGGLFAPRWRSDARACISGMSFNTSKAHIVRALLEGIVFQLSEIVNSLTS…
PBANKA_0821700	A0A509AIS9	Inosine-5'-monophosphate dehydrogenase OS=Plasmodium berghei (strain Anka) OX=5823 GN=PBANKA_0821700 PE=3 SV=1	55.9	0	106716	0	28924	0	0	49397	50460	0	0	0	0	0	0	0	0	0	ND	ND	ND	ND	4	13	4	11	MANGWDAEKIFGSTISYTYDDIICMPGYIDFPLSEIDLSNNMTKDICLKTPIISSPMDTVTEHKMAISMALCGGLGIIHNNMSIENQIEEVKKVKRFENGFIFDPYTFSPEHTVADVLCVKNKVGYKSYPITSDGKVGSKLVGIITGIDYLYLTNPDVKIKDIMTTELVTGKYPISLSDANKVLCNEKKSILPIVNDNYELIALVCRNDMHKNRIFPHASKRENKQLIVGASISTRGSDLEKVNKLVQNMIDIICIDSSQGNSIYQIDMIKKIKSAYPDIPIIAGNVVTSNQAKNLIDAGADVLRIGMGSGSICTTQDVCAVGRAQGTAVYHVSNYAHTRNIKTIADGGIKNSGNIVKALSLGADFVMLGNLLAATEESCSEYYFENNVRLKMYRGMGS…
PBANKA_1343300	A0A509AR45	Proteasome subunit beta OS=Plasmodium berghei (strain Anka) OX=5823 GN=PBANKA_1343300 PE=3 SV=1	29.8	0	76042	35371	0	0	190930	85643	60398	0	0	0	0	0	0	0	0	0	ND	ND	ND	ND	4	11	4	24	MKLDYINAIKEENGGYNFENLKRNEILKEKGVTFPKFRKTGTTICGIVCQNAVILGADTRATEGPIVADKNCSKLHYISKNIYCAGAGVAGDLEHTTLWLQHNVELHRLNTKTQPRVAMCVSRLTQELFKYQGYKVCAIVLGGVDVTGPQLYGIHPHGSSCLLPFTALGSGSLNAMTVLEAKYRDNMTIEEGKELVCEAICAGIFNDLGSGGNVDICVITKDGTQHIRPYKQPNTRLYHLSHPTIYPKGTTPILYEKIENIKKHITIEDA
PBANKA_1223100	A0A509ANK1	Proteasome subunit alpha type-6, putative OS=Plasmodium berghei (strain Anka) OX=5823 GN=PBANKA_1223100 PE=3 SV=1	29.6	0	0	0	47744	0	139657	27358	39644	0	0	0	0	0	0	0	0	0	ND	ND	ND	ND	4	11	4	22	MVRQSQSMYDRHLTIFSPDGNLYQIEYAIKAVKNTNITSLGVKGENCAVIISQKKMATQYITQDKLLDYNNITNIYNISDEIGCSMVGMPGDCLSMVYKARSEASEYLYNNGYNLNVETLCRNICDKIQVFTQHAYMRLHACSGILIGMNEDNKPELYKFDPAGFCAGYRACVIGNKEQESISILERLLEKRKKKIQQETLEEDIQNTIILAIEALQAILAFDLKANEIEMAIVSKKNPNFIQISEKEIDNYLTFIAERD
PBANKA_1026200	A0A509AN28	Glutamate dehydrogenase OS=Plasmodium berghei (strain Anka) OX=5823 GN=PBANKA_1026200 PE=3 SV=1	52.9	0	0	0	85782	0	214728	83636	103049	0	0	0	18852	0	0	0	0	0	ND	ND	ND	ND	4	17	4	10	MTQCRDSTGRFLLVDKKAPNYENIINKEMNEVYERVKKIDPNQSEFLQAFHEILYSLKPLFMEEPKYLPIIEMLSEPERLVQFRVCWIDDNGIQRKNRGFRVQFNSTLGIYKGGLRFHPSVNLSIVKFLGFEQIFKNSLTGLSMGGAKGGSDFDPKGKSDNEIMKFCQSFMNELYRHIGPRTDVPAGDIGVGGREIGYLFGQYKKIANCFNGTLTGKNEKWGGSILRTEATGYGLVYFVLEVLKSLNIQMDKQTAIVSGSGNVALYCVQKLLQLNVKVLTMSDSNGYIYEPNGFTNDDLNFIIELKEVRKGRIEEYLNHSSTAKYFPKEKPWNVKCTLAFPCATQNEIDLDDAKLLHKNGCILVGEGANMPSTIEAINYLKENKIILCPSKAANAGGVA…
PBANKA_0107300	A0A509AAP0	T-complex protein 1 subunit zeta, putative OS=Plasmodium berghei (strain Anka) OX=5823 GN=PBANKA_0107300 PE=3 SV=1	61.4	0	0	17175	64444	0	90333	179129	208596	0	0	24807	21609	0	0	0	0	0	ND	ND	ND	ND	4	21	4	9	MSVHMLNKKADSLRSTNVLLTNINASKGMYEIIKSNLGPKGSYKMLVSASGAIKITKDGNVLLNEMMIQHPTATMLGRICSSIDENLGDGSSSNLIITTGLIYLSEKYILYENIHPRIITQGFDTIKNILFDLLNTMKIPINMENHFNKEILYNVAKTCVRTKLPIQLADKLSEDLVDSIQIVYNKNKQIDLHMIEIMDIKRNMSINTKLVRGMVLDHGCRHPNMPNRLTKCFILVLNTSLEYEKSEVFSSFVYSNAEDRDKLVESERKFTDDKIKKIIEIKKNIIEKKFKETGEMYNFAVFNQKGIDPMSLDLLAKENIMALRRIKRRNLERIVLCCGGNPCNNVYDIVDDDIGYAGLVYEICVNDEKYTFIEDVLNPKSCTIFIQAPNDYTIKQIKD…
PBANKA_1456200	A0A509AST9	Rab GDP dissociation inhibitor OS=Plasmodium berghei (strain Anka) OX=5823 GN=PBANKA_1456200 PE=3 SV=1	52	0	18617	0	61859	0	162748	177042	140408	0	0	22877	24818	0	0	0	0	0	ND	ND	ND	ND	4	26	4	13	MNEHYDVIILGTGLKECILSGLLSHYGKKILVLDRNPYYGGETASLNLTNLYNTFKPNEKIPSKYGENRHWNVDLIPKFILVGGNLVKILKKTRVTNYLEWLVVEGSYVYQHQKKSLLFSEKFIHKVPSTDMEALVSPLLSLMEKNRCKNFYQYVSEWNANDRNTWDNLDPYRLTMMDIYKYFNLCQLTIDFLGHAVALYLNDDYLKQPAYITLERIKLYMHSISAFGKSPFIYPLYGLGGIPEGFSRMCAINGGTFMLNKNVTDFIYNDNNQVCGIKSSDGEVAYCDKVICDPSYVMHLENKIQKIGQVIRCICILSNPIPETNDINSCQIIIPQNQLNRKSDIYVNLVSFQHGVSYKGKYIAIVSATVETSNPTKEIEKALELLGPIDEKFIKISDL…
PBANKA_1144000	A0A509APS4	26S proteasome regulatory subunit RPN11, putative OS=Plasmodium berghei (strain Anka) OX=5823 GN=PBANKA_1144000 PE=4 SV=1	35.1	0	60344	0	22244	0	37921	62392	78916	0	0	0	28522	0	0	0	0	0	ND	ND	ND	ND	4	14	4	19	MAGIPSSLRELFYSFSDGNGMSNEPLADTSEQVYISPLALLKILKHGRAGVPMEVMGLMLGEIVDEYTIRIVDVFAMPQSGNSVSVEAVDPVYQTNMLEELKKTGRHEMVVGWYHSHPGFGCWLSGTDVNTQKSFEQLNPRTIGVVVDPIQSVKGKVVIDCFRLINPHILMLGQEPRQTTSNIGYLTKPTLTALVHGLNRNYYSIVINYRKNELEKNMLLNLHKDIWVNPLKLLEFDEQKKNTDETLESIKKLTSLYNKNLSNEMKKTREEILLENIGKIDAKKRIQNCVETLLNDSILTCIGTMANTLFF
PBANKA_1460400	A0A509AW13	peptidylprolyl isomerase OS=Plasmodium berghei (strain Anka) OX=5823 GN=PBANKA_1460400 PE=4 SV=1	35	0	0	0	44196	0	178790	167904	93931	0	0	0	30665	0	0	0	0	0	ND	ND	ND	ND	4	14	4	15	MENIENIENIEKIHLTDDGGVIKTILRKGNEGEENVPKKGNEVTVHYIGKLESDGSIFDSSRQRDVPFKFHLGNGEVIKGWDICVASMKKNEKCLVRLDSKYGYGKEGCGETIPGNSVLIFEIELLSFKEAKKNIYDYTDEEKIQAAFELKDEGNEFFKKNEINEAIAKYKEALDYFMHTDEWEDELLEKKKNIQIICNLNLSTCYNKNKDYPNAIEHASKVLKLDKNNVKGLYKLGVANMNFGFLEEAKINLYKAASLNPKNLDIRNSYELCIAKLKEARKKDQITFGGMFDKGSLYEEKKTNPI
PBANKA_1211000	A0A509ALY6	GMP synthase (glutamine-hydrolyzing) OS=Plasmodium berghei (strain Anka) OX=5823 GN=PBANKA_1211000 PE=4 SV=1	62.7	0	25506	0	20253	0	35149	29413	116414	0	0	0	72090	0	0	0	0	0	ND	ND	ND	ND	4	16	4	11	MEGDNYDIILVLNFGSQYFHLIVKRLNNIKIYSETKDYNVDLKDIKNLNIKGVILSGSPHSVNAKNGPHIKKEVLNYFIENKIPIFGICYGMQEIAFHMNGQVGKSKNSEHGSTEVTLISNDYKDNELYKNYKLLEKDSNCLLFDDIKNTNNMNVWMNHTEEVIEIPENYYLVNSSENCFICAFYNKENNIYGVQYHPEVYETADGDQMFYNFAYKICKCTKTFDPIKYHEVEFNNIKKHAHDHYVIAAMSGGIDSTVAAAMTHKIFKDRFYGIFIDNGLLRKNEGEKVYKFIKSTFPDMNITKIDASENFLNQLKGVTDPEQKRKIIGKLFIEEFEKAVYSMDIDIEKTYLLQGTLYPDIIESKCSKNLSDTIKTHHNVGGLPKNLKFKLFEPFKFLF…
PBANKA_1362000	A0A509AR09	glutamate--tRNA ligase OS=Plasmodium berghei (strain Anka) OX=5823 GN=PBANKA_1362000 PE=1 SV=1	94.1	0	0	0	24260	0	36581	46420	54639	0	0	0	0	0	0	0	0	0	ND	ND	ND	ND	3	7	3	5	MIKDSKINIYYGKNYPFLCRTVFNIYQNNIKKKTANNLNDKKIKEICVNFINDKTVVEDIKVEFVRNTVSDQTRKNTNTNNSVTSSDKIFAINLDFLLKTNLYYFTSYRENINRNIITNVFFQAQYNEWIDFLRNKDIEKNIIPICEHINKHLYLNTFLSFHYLTLSDIYIYYEMHKYFSGNITTNLKYPKQYKNINRWFRLIKALLHDHVATDAELIQNLKVKEKIFNTAGSGKRLGNNGNKYSAHSDHTNTKGGATSLSSYEGKLQNAEKGKVVTRFPPEPSGYLHIGHIKAAFLNNYYANIYEGKMLLRFDDTNPVLEDVKFENSIIEDLETLSIKYEKISYTSDYFQLLEEYCIKLIKMNKAYADDTNVDEMRNQRGEGIESVNRNNSIETNLKL…
PBANKA_1130400	A0A509APB9	Proteasome subunit alpha type OS=Plasmodium berghei (strain Anka) OX=5823 GN=PBANKA_1130400 PE=3 SV=1	27.7	0	0	0	23590	0	55305	75147	73588	0	0	0	0	0	0	0	0	0	ND	ND	ND	ND	3	6	3	13	MARRYDSRTTTFSPEGRLYQVEYALEAINNASITIGIITNGGVILGADKVFISKLINKANNFEKIYKIDDHIFCGVAGLNADANILINQSRLYAQRYLYNYNDVEPVAQLVVQICDIKQSYTQYGGLRPYGVSFLIAGYDTKEGYQLYHTDPSGNYSGWFATAIGTNNLTASSILKQEWKKDMTLQEGLLLAIKTLAKSTDSEIPKCEKIELAYLANQDGKVIQKYLTEKEIAELIKIYTQQNVKK
PBANKA_1452600	A0A509ASA4	Calcyclin binding protein, putative OS=Plasmodium berghei (strain Anka) OX=5823 GN=PBANKA_1452600 PE=4 SV=1	26.6	0	0	0	0	0	74923	86743	112707	0	0	0	0	0	0	0	0	0	ND	ND	ND	ND	3	6	3	15	MESEQLKQLNGDIEELKTILSKVVRENVKRKISRVIEDITVEIAKLKLDEFQKPNKINITNSEKNDNNISYSSVPSFAWNQEKNKVTVFLTIKNIQNISKENIISEFNERDFEIKIHNVDFKNYRFCIKKLHDKIIPNKCSIKIKKDLIQVYLIKQDNKQWDNLHFKESPMSKIRPPKLNDQTEPSAMLMDMMKQLYQEGDSDMKRTIAKAWCEANDKKNDFGSAF
PBANKA_0513600	A0A509ALD0	Adenosine deaminase OS=Plasmodium berghei (strain Anka) OX=5823 GN=ADA PE=1 SV=1	42	0	0	0	64031	0	0	188553	76773	0	0	0	0	0	0	0	0	0	ND	ND	ND	ND	3	6	3	8	MEIPNEEIKFLKKEDIKNINLNGMNKKERYEIWKKIPKVELHCHLDLTFSGKFFLKWVRKYNLQPNMTDDQVLDHYLFTKEGKSLAEFIRKAISVSDIYRDYDILEDLAKWAVIEKYKEGVVLMEFRYSPTFVSSSHGLDIELIHKAFVKGIKNATEMLNNKIYVALICISDTGHSAASIKHSGDFAIKHKHDFVGFDHGGREIDLKDHKDVYHSVRNHGLHLTVHAGEDATLPNLNTLYTAINILNVERIGHGIRVSESEELIELVKKNNILLEVCPISNLLLNNVKSMDTHPIRKLFDAGVKVSVNSDDPGMFLTDINDNYEKLYIHLNFTLEEFMTMNNWALEKSFVNDDIKSKLKTMYF
PBANKA_1334100	A0A509AX43	Proteasome subunit beta OS=Plasmodium berghei (strain Anka) OX=5823 GN=PBANKA_1334100 PE=3 SV=1	22.8	0	0	0	27190	0	147213	0	31234	0	0	0	21951	0	0	0	0	0	ND	ND	ND	ND	3	9	3	15	MDTLIGLKGKDFIILGADTYSINSIIKLKNDDKTKFYDINGNKCLLLGGSIGDRIQFGEFIRKNVHLYQYQNSTSLYVKSFAYFTRKNLAYYLRRNPYEVNCLIAGYDDKDGYQLYWCDYLSNMDAINKGAHGYGAYLVNAILDKYYHENMNLEEALVIFKKCFEELKKRFLLTQINYELRIMSNNKIETQYVNI
PBANKA_1321000	A0A509APK3	MA3 domain-containing protein, putative OS=Plasmodium berghei (strain Anka) OX=5823 GN=PBANKA_1321000 PE=3 SV=1	70.7	0	0	0	33307	0	33888	83549	161397	0	0	0	23751	0	0	0	0	0	ND	ND	ND	ND	3	9	3	6	MDSNKRKSKKLNLLKDQNFLTKKYVDMNDPIYDSELEDENCFFTVVNAEEIEYSQKVNKMKSKMFEDLSILTFEEFEKKCDLLISNFFTSYNFKEFIENLKELNENKYNDYLVLQLIKKSFDRDDECQINVSCLLNLLSITKLINQEQVHRAFEKILLSLDDIKLDCPLCYEIFLKYLRFSTLDNVIDKNYIFKLPTMFFDSLNIQDIDESSLGIENGKINGEISTFPDDGNIKEKKQDSCNNLDDKPEDRENDDMYEQNNEDVEEKKKTKDEIWKDTLYWVLELNIKEMEKEKKNFKKKSRDFLCDFFNDGNIDEVIEFLNNTNSLFHYEFIRISIIESFSKNNICRKFISYLLDNLSETYYFKNDIIIAFIRIIGYIDDYEIDFPNSKEMICKFLLR…
PBANKA_1112300	A0A509AM53	Ras-related protein Rab-1B, putative OS=Plasmodium berghei (strain Anka) OX=5823 GN=PBANKA_1112300 PE=4 SV=1	22.9	0	0	0	97841	0	42939	0	74053	0	0	0	31589	0	0	0	0	0	ND	ND	ND	ND	3	8	3	16	MNDSYDSLFKILLIGDSGVGKSCLLLRFADDTYTDSYISTIGVDFKIKTIEIDDKIIKLQIWDTAGQERFRTITSSYYRGAQGIIIVYDVTDRDSFNNVKNWIIEIEKYASEDVQKILIGNKIDLKNDRSVSYEEGKELAESCNIQFLETSAKISHNVEQAFKTMAYEIKNKSQLENQQKGRTNINLNAKPIKDNKKKCC
PBANKA_0303600	A0A509AF33	26S proteasome regulatory subunit RPN1, putative OS=Plasmodium berghei (strain Anka) OX=5823 GN=PBANKA_0303600 PE=3 SV=1	110.6	0	22671	0	0	0	0	0	68897	0	0	0	37421	0	0	0	0	0	ND	ND	ND	ND	3	5	3	6	MAVEDKKAVSIKVPVKDGDADEKRRKLNNLKIKNEELNEEEKKKKEELELLITRLKDDNPNVVNLSITLLNKEIIDTSGILTSSLFALKVLKLHYNTLIEIHTGMIFDDCKQRLSNMISALSTTIGYESNIVKYIIMGNKKDLINYGHEYIKNLTTKLIAEYKNIKDEEAVQNQYYANNSITTTSISTSPISGPSKGGAVNMMNHIHELVNIIVPYCFNHNTEYEAIDLLIEVDRINDICQYVDDKSCERSILYLLNLTHYSSSTEEYYKLMEVILSILKKHKKHVECLKILLRLNRRNKIKDLIFECGDLLICKQMALICSRHCIHLEFTQEEIIKHPHLNLNEISTLSSGEHLPSIFLKLAKDLDVEEPKLPEDIYKTHLEEKRNTNLWDSTKQNLS…
PBANKA_1301400	A0A509AVK2	Proteasome subunit alpha type-1, putative OS=Plasmodium berghei (strain Anka) OX=5823 GN=PBANKA_1301400 PE=3 SV=1	28.9	0	0	0	11337	0	131880	66210	16124	0	0	0	44574	0	0	0	0	0	ND	ND	ND	ND	3	10	3	18	MYRNLYDTDNIIYSPEGRLYQVEYANEATKQGTCAVAIKSKEFVVVCGLKKCISKLSYHQEKLFKIDDYIGVTMSGITSDAKVLTKYMRNECLTHKFLFDENMNIEKLVKKVADKYQKNTQKSSKRAFGVGLIISGYFNEPHIFETKSNGSYFEYEAISFGARSHASKTYLEKNLHLFEESSLDDLVIHCLKALKCSLSSETELNADNTSLAIVGKDKPWEEMPYVELIDYLTKVNSEKRTEDSQENAQNIGN
PBANKA_0505800	A0A509AG19	deoxyribose-phosphate aldolase OS=Plasmodium berghei (strain Anka) OX=5823 GN=PBANKA_0505800 PE=4 SV=1	29.2	0	0	28816	145619	0	66039	42228	88618	0	0	0	45463	0	0	0	0	0	ND	ND	ND	ND	3	11	3	20	MANYTEKFAAWSIICLTDHTFLDENGTEDDIRELCKESVRTCPFAAAVCVYPKFVKFINEKIKQEINPFKPKIACVINFPHGTDSIEKILNDTKKAVDDGVDEIDLVINYKKIIENIDEGLKEATNLTQSVKNLLKNKILKVIIEVGELKNEDLIIKTTLAVLEGNADFIKTSTGKVQVHATPSSVEYIIKAIKEYIKNNPDKNNKVGLKVSGGISDLNTASHYILLARKFLSSFACHPDNFRIGSSSLVLKLRKVIAQCPM
PBANKA_1016300	A0A509AKT4	Proliferation-associated protein 2g4, putative OS=Plasmodium berghei (strain Anka) OX=5823 GN=PBANKA_1016300 PE=3 SV=1	42.7	0	0	0	45470	0	48725	0	52964	0	0	0	61074	0	0	0	0	0	ND	ND	ND	ND	3	6	3	9	MELTTQNKTDEIDLEKYAFSGSIANLTLKKIIEKCIDGAKIYELCEFGDKFMKAELDKVFTKKEKGNKIEKGISFPVTINVNEVCNNYSPSADCDEIIKNGDIVKISLGCHIDGHISIVGHTIYVGNENESIEGSKAEILKNSHILAQLFLKSLKVGVYASDITKNIQKACNDLKCNVIPNCVTYQIKKYILEGSKFILLKENPENKVDDFQIQPDDIYIIDVMVTTGDGKIKESDYKTTIYKREVQRNYQLKTNLGRSFINEVNKNYPIFPFHLKFLDDQRASLIGIPEAMRHDLIKPYTVYTEKKKEYVSQFKYTVMVKEDGVKQFTGIKCPQINKCKTANTIQDEALKNILNSSGGKKKKDKLKNSEEATETAN
PBANKA_0107400	A0A509AGT3	Ornithine aminotransferase OS=Plasmodium berghei (strain Anka) OX=5823 GN=PBANKA_0107400 PE=3 SV=1	46.3	0	15334	16615	0	0	95404	143975	101923	0	0	8914	74735	0	0	0	0	0	ND	ND	ND	ND	3	16	3	10	MEFVKDLKTPEDYINNELKYGAHNYDPIPVVLKRAKGVFVYDVNDKKYYDFLSAYSSVNQGHCHPNILNAMINQAKNLTICSRAFFSVSLGICERYLSNLLGYDKVLMMNTGAEANETAYKLCRKWGYEVKKIPENMAKIVVCKNNFSGRTLGCISASTTIKCTYNFGPFAPQFSKVPYDDLEALEEELKDPNVCAFIVEPIQGEAGVIVPSDNYFQGVYDICKKYNVLFVADEIQTGLGRTGKLLCVHHYNVKPDVILLGKALSGGHYPISAVLANDNVMLVIKPGEHGSTYGGNPLAASICVEALNVLINEKLCENSEKLGGPFLENLKRKLKDSKIVRDIRGKGLLCAIEFKNELVNVLDICLKLKENGLITRDVHDKTIRLTPPLCITKEQLDEC…
PBANKA_1222900	A0A509AUF9	26S proteasome regulatory subunit RPN10, putative OS=Plasmodium berghei (strain Anka) OX=5823 GN=PBANKA_1222900 PE=4 SV=1	47.9	0	0	0	0	0	0	55127	48607	0	0	0	0	0	0	0	0	0	ND	ND	ND	ND	2	3	2	6	MSNIEATIICIDNSDYNMNEDIVPNRFMSQIDCVNILCCNKTSMHYKNSIGVLVMAGDGIKVKVSLTNDIGQLLSCIHDIKIDGSCDLIRSLLIAQLALKHRVDKNLEQKIIIFIGSPIEVNEKQLINTGKQLKKNNISIDIISYGNINKNRDKLNKLFESTNNNGNCRIIECPENEENLSKYVLNKILNNNNFNMNNLDEDAQLLTAMELSMGASNNTTGVPNTLSNNNTQSDNNNINSRKNLNDLPTIQDIENMKDIDNELKEALLLSLREYNEKNKTDPENQNENNKINSELKNEGNGENLTIVNEEYKNIFDNEKTDLQTKQIGEKKENESYEKVFKICKDENIEDDNNKFQINPNIYINTENNTQNINKETNDDKNEFSIQDTNYISQILEKIP…
PBANKA_1103100	A0A509ALW6	Actin-depolymerizing factor 1 OS=Plasmodium berghei (strain Anka) OX=5823 GN=PBANKA_1103100 PE=3 SV=1	14	0	0	0	38943	0	199377	0	0	0	0	0	0	0	0	0	0	0	ND	ND	ND	ND	2	3	2	29	MISGIRVNDNCVTEFNNMKIRKTCRWIIFVIENCEIIIHSKGETTSLKDLVDSIDKNNNIQCAYVVFDAVNKIHFFMYARETSNSRDRMTYASSKQALLKKIEGVNVFTSVVESALDVADFK
PBANKA_0408600	A0A509AD73	Eukaryotic translation initiation factor 3 subunit K OS=Plasmodium berghei (strain Anka) OX=5823 GN=PBANKA_0408600 PE=3 SV=1	28	0	0	0	0	0	95732	0	0	0	0	0	0	0	0	0	0	0	ND	ND	ND	ND	2	2	2	10	MNINSIIEEVQAIKVYPHMMFNASKLKVLSDYVDIAFENNEYFDNEVMLTLLRLFCLYPHCYDKSVIKKILVCVLYNINTVDMNIYLSLINPNIYDDNIKGIVYLHDLIKECQFKKLWNCINNKSEENNNYDYSFLQNYNNFTCNIRKYILNSITLSFEKISIKQISEYLNMENVEEIEKFLNENKWTVKKIKNKDGEEQTICINENIENIQNRKNISTYFNDDNLTSYINKLNS
PBANKA_0931100	A0A509ALZ0	Uncharacterized protein OS=Plasmodium berghei (strain Anka) OX=5823 GN=PBANKA_0931100 PE=4 SV=1	24.8	0	0	0	72115	0	46821	0	35266	0	0	0	0	0	0	0	0	0	ND	ND	ND	ND	2	5	2	10	MSYNKNYGGQFMGLRQGATNKGPQFSNNKDKFDKIKLNELKPTDKKEKVSATKVILYLSELRGINLPEIENGEIYFFCTAIFDNQDVKLSMEKSNYNSPLVKGEYLSNAYALDFESEIVLKIPEDATFVRCYISYVSSIEADGKRNIKLEGIGYTDPFIVKECHVYPYSRCKLNIATGAQELGGTLKVCVKCVDNAHPSTVKATEPCNVIEEFKKRYEN
PBANKA_0615400	A0A509AJP2	serine--tRNA ligase OS=Plasmodium berghei (strain Anka) OX=5823 GN=PBANKA_0615400 PE=4 SV=1	61.8	0	50283	0	0	0	97613	91781	66687	0	0	0	0	0	0	0	0	0	ND	ND	ND	ND	2	5	2	4	MVLDINLFRTEKGGNPEKIKESEKKRFNDVSNVDKVIEYDEKWRKSIFKLEELKKNINLINKTIGNKKKEDKNVDVEDLKQRSLSMKEEIPLIQNEEKHLLKQRNMYLAKVGNILSSKVVINNDEEYNKIVRTWGECKNYEATDLEKSDISKEDIPNTKREVGNNNDGQNKVSIISEIKKKYYYHYDLLRKIGGVNFKKGVLVAGHRGYYLTGAGFLLNNAIIQYAINFLANKKYTPVYPPFFMKKNIMEECAELNDFEETLYKISSSSVASAEDKNIDANSGNNNISNEKSNKDDLFLIATSEQPLCALHRDETLESKYLPLKYVGISSCFRKEAGAHGKDIRGILRVHQFDKVEQFCISLPQTSYKLHEEMIKTCEEFYQSLNIPYKIVNIVSGALN…
PBANKA_0938600	A0A509AJ39	Casein kinase 2, alpha subunit OS=Plasmodium berghei (strain Anka) OX=5823 GN=PBANKA_0938600 PE=3 SV=1	39.9	0	0	0	0	0	116202	87291	36583	0	0	0	0	0	0	0	0	0	ND	ND	ND	ND	2	4	2	10	MATNQINKRIYIPKFYADANIHKPKEYYDYDNLELQWNKPNRYEILKKVGRGKYSEVFNGYDTEYNRLCAIKVLKPVKKKKIKREIKILQNLHGGPNIIKLLDIVKDPVTKTPSLIFEYINNIDFKTLYPKFTDKDIRYYIYQILKALDYCHSQGIMHRDVKPHNIMIDHENKQIRLIDWGLAEFYHPGQEYNVRVASRYYKGPELLIDLQLYDYSLDIWSLGCMLAGMIFKKEPFFCGHDNYDQLVKIAKVLGTEDLHAYLKKYNIKLKPHYLNILGEYERKPWSHFLNQSNMDIAKDEVIDLIDKMLIYDHAKRIAPKEAMEHPYFKDVREES
PBANKA_0903600	A0A509APG4	Dynamin-like protein, putative OS=Plasmodium berghei (strain Anka) OX=5823 GN=PBANKA_0903600 PE=3 SV=1	93.5	0	0	0	0	0	0	50883	172138	0	0	0	0	0	0	0	0	0	ND	ND	ND	ND	2	3	2	2	MESNIYVNLRKLISVIDELRDIGLQKYINLPRICVVGTQSSGKSSVLESIVGLDFLPRGEGVVTRRPIEFRLIHIKDDSEIKHWATFEDNKNEKFTDFNKVREHINSLTDQIAGTNKGIIDEPIILNIYSTGCPDLSLIDLPGITRVPLKNSDQTDDIERLTREMAFRYVKDPRTIILAVLPANADMSTSDALQIARKVDPKGLRTIGVITKIDLMDKGVDASKMLLNDEINLRLGYTGVINRSSADIKQGKTISQSLKDELNFFQNHPVYKKLPQSLYGTTSLTDKLTKVLLRHIKNFLPDIKIEINDRIRAINDKLFSLGTNVPLDATKKTQILWSMITDYCEIFKNTLKGKYDKRLQVFIENNDIICGLKVRQIFNELLDEYAGKNVTSELSDNDI…
PBANKA_1210900	A0A509ATT9	Phosphoglucomutase, putative OS=Plasmodium berghei (strain Anka) OX=5823 GN=PBANKA_1210900 PE=3 SV=1	68.1	0	0	0	79805	0	0	112784	53627	0	0	0	0	0	0	0	0	0	ND	ND	ND	ND	2	5	2	6	MNKIKSPELLKSIELWNLFSKPKYLSDQTEEVINNYNEEELNKLFLKRLNFGTAGLRGKMGVGFNAMNVVTIIQTTQGLCEYLINKYGINLCKNRGIIFGFDGRHNSESFSHVAASVCLSKGFRVYLFGQTVATPILCYSSFKKNCLCGVMITASHNPKLDNGYKLYGENGAQLISPVDKNIYNCILDNLKPWNDIYEYLNEDFYLKDKSLVEDIYHEMYDLFTSDLKSEFNFSYCRNSRTKLVIVYSPMHGVGRKFVQGIMQIVGYNNLLTVPQQALPDADFPTVTFPNPEEKGALNLSIELADLVNSPLVVANDPDADRFACAEKYNNKWKIFSGDELGIIFAYFIMKQYEKKNIDKSKHVFLCTIVCSRMLKTLCQKYGYMYDETLTGFKWLINKA…
PBANKA_1142400	A0A509AMS9	Nucleoside diphosphate kinase OS=Plasmodium berghei (strain Anka) OX=5823 GN=PBANKA_1142400 PE=3 SV=1	17.1	0	0	0	121807	0	76584	0	32436	0	0	0	0	0	0	0	0	0	ND	ND	ND	ND	2	7	2	20	MEKSFIMIKPDGVQRGLVGVIIKRFERRGYKLIGLKMLNPTEEILKEHYKELSDQPFFKKLVDYINKGPVVAMVWEGMDIVKQGRKLIGETNPLNSNVGTIRGDFCLEVSRNVIHGSDSVASANREINIWFKAEELVQWKSHSNDWVYA
PBANKA_0836800	A0A509AJ70	Erythrocyte membrane associated protein 1 OS=Plasmodium berghei (strain Anka) OX=5823 GN=PBANKA_0836800 PE=4 SV=1	38.2	0	0	0	0	49801	28796	0	0	0	0	0	0	0	0	0	0	0	ND	ND	ND	ND	2	2	2	8	MVKIHIEKFFFAVNLFLYLSDKCFAIEHASSSDTINEDEKVLVNTTLQETISSNDVSQNNSTDIDSTLKLVSSNFDLPKFASSSISLKNGKSQVCTDPEEIKKVTEIMDEAVYRLKYHSNFNNGYNHYYVGNEELSLCFTEDNGIKFERFHLVIPNPDNYEEIVKMFYTFRGIPYMDNFDFTEKLVHEYYSNLSLMYNSYESRTTPFCGYSFVLSADIQVSEDITMFVQTSVDIDDHNEFDTEKYKNTIVESANSLNIDVYANEYDQMENKTKLFVNLSGIIVKKKSDSVRVTYVNSIHNGDSFPKDFCDKQFRVKNMLYLIDLLKNSFK
PBANKA_0715200	A0A509AMU8	Eukaryotic translation initiation factor 3 subunit G OS=Plasmodium berghei (strain Anka) OX=5823 GN=PBANKA_0715200 PE=3 SV=1	31.5	0	0	0	0	0	51090	23382	0	0	0	0	0	0	0	0	0	0	ND	ND	ND	ND	2	3	2	10	MIQTEKKNWVDIDVDDDESLNDNENKKKWEDIDADDDLESNKKLSYFTNYENGVKVVTKYSENLKKQTVKVTKKIKEVIIKKRLNKEIENRLKLKNFNVDAFSSVIVEPTDVVNIEPPKNNLLDFLKDTEYDYLFAEQTDKTAKDLKNRFKMFKDEEAEEAKPDDANKVGAKRDMMYYRSHDTQNKECTIRVTNLSEDVNESELSNLFGRVGQISRMFLAKHKETQNSKGFAFITYSKREEAKRAIEKLNRHGFENLLLSVEWAKPSNR
PBANKA_0210200	A0A509ACL7	aspartate--tRNA ligase OS=Plasmodium berghei (strain Anka) OX=5823 GN=PBANKA_0210200 PE=3 SV=1	81.2	0	0	26134	0	0	58038	0	0	0	0	0	0	0	0	0	0	0	ND	ND	ND	ND	2	4	2	4	MGNMNKRFITQLNKINDIKKNIFIVRKENKKVINSFFSVKEKQRFLPLAKLNKNKNFGKFSYLSFLSEFKKLKNFYVYTKIKKTRYIRKDCLNNRDNNNSNKNFEQTYNEMESEQMNNNGNIIPDEISDKKKEKKAKKLEEKKLKLAKKLERENLKNEAAKVLEHVCEDINKESYGYVKLSIIMENGKNIHLYNPEEIYNLLYVKNDINLEKNVDRNEKREDIESEMNNKNNKLEEGSCLWVRGRIHDIRSKGSLAFIILRNKIYSLQCILDIKNVNNDKNMIKWVNNLSLESIVDIYGKLVKPEISIDSTIIKYEIHILKIFCISKNSKELPFLLKDANMKEIDDEATIRVNQDNRLNNRCIDLRTYANYSIFYLQSEICKIFRNYLIDNNFTEIHTP…
PBANKA_1348900	A0A509AQM6	Chaperone binding protein, putative OS=Plasmodium berghei (strain Anka) OX=5823 GN=PBANKA_1348900 PE=3 SV=1	61	0	0	0	0	0	0	39593	35957	0	0	0	0	0	0	0	0	0	ND	ND	ND	ND	2	2	2	4	MVCTEEEKKKGEEHEKELNEKIKNMSFDERIKNALDAKLDGNNDFKNKDYENGINKYKAGLKYIKDMENKNDKIKELEIALFLNLSICYYNMEKYNDAHEYVTKVLNIDKTNKKGMFRLCQIEFNRCSFDVAKEKIHEFLKIYPENIDAKKLLKNVIIKQNEHNKKQKEAFSKIFEKASGLYEDREKEIIQKKKEKYEQDMKKKKENNEEIINFEEWEIQENEKRKKEDEEQKKKQKEKEMEREKEREKNNKKKQNNKKNESISSNTTHNSSDLEIDEEDQKIINETKKMGYCYFKKDIKDDDKKLFEKNIPRKIEEANDIDLNSQKNSNKAISSWNSGGTTYEEKDMTKWVKNKLDYYLKNISFKNTEESDYLNLNNQNEFNLTNLNYPEILPIQYLN…
PBANKA_1036600	A0A509ANG0	Ribonucleoside-diphosphate reductase small chain, putative OS=Plasmodium berghei (strain Anka) OX=5823 GN=PBANKA_1036600 PE=3 SV=1	40.5	0	48231	40489	0	0	177030	173598	0	0	0	0	0	0	0	0	0	0	ND	ND	ND	ND	2	9	2	9	MAEVMNISKSASFSKQEKEFSDFQKTKESNEKILNKESNRFTLHPIIYPEVWNFYKKAEASFWTAEEIDLSSDLKDFEKLNVNEKHFIKHVLAFFAASDGIVLENLASKFLREVEIIEAKKFYSFQIAVENIHSETYSLLIDNYIKDEKERLNLFHAIENIPAIKNKALWAAKWINDTNSFAERIVANACVEGILFSGSFCAIFWFKKQNKLHGLTFSNELISRDEGLHTDFNCLIYSLLENKLPEEVVQNIVKEAVEVERSFICESLPCDLIGMNSRLMSQYIEFVADRLLECLGCSKVFHSKNPFNWMDLISLQGKTNFFEKRVADYQKSGVMAQRKEQVFSLNTDF
PBANKA_0943200	A0A509AMQ4	Casein kinase II subunit beta OS=Plasmodium berghei (strain Anka) OX=5823 GN=PBANKA_0943200 PE=3 SV=1	28	0	0	0	0	0	36909	26400	35089	0	0	0	20409	0	0	0	0	0	ND	ND	ND	ND	2	4	2	14	MNISDSNKDGKDSKSDKSTSWVKWFNSRVISNFLVVVDNEYIEDSFNLYGIKNEISNFNHLLSIITGDAPDDEHAKNSLEKDAICLYSLIHARFITTPKGLSLMKDKYIKGDFGHCSRVSCSQHNVLPIGLFDQIKIAKVHVYCPLCQEIYKIHDDKIYLDGAFFGASFPHIFLQTYPYYSTLKTPSYCTSKIFGFSVYHNYTRTEYKIAKGEFGKISKDNFLKKNPKYLKKLKKEELQIKDA
PBANKA_1457800	A0A509AVL6	ADP-ribosylation factor GTPase-activating protein, putative OS=Plasmodium berghei (strain Anka) OX=5823 GN=PBANKA_1457800 PE=4 SV=1	33.1	0	0	0	0	0	0	0	0	0	0	0	24302	0	0	0	0	0	ND	ND	ND	ND	2	6	2	12	MNSAAIEVINKLKKDDESNNKCFDCGTPNPDWVSVNHGIFLCINCSGVHRSLGVHISVVRSIKMDIFTDEQLKYMDKGGNKKFQTYLENYGVNDFIPERKYRTKASDHYRQIIRSIVNNSNPPLPLPLDEGKHIINYGINENVNYSDNKNYNSNINHDQNFVNSINTTEILENVSATFSSLINKAQTMTTNTINNLNKNDIIETTKDTLINSGSWITEKTKQIAENVSENPWWEKGQSKIKDATQNASGWISSISSTVSRTNSSLFFSNNDNMSNNNESKAAPNTSNISGNGTNEA
PBANKA_1137000	A0A509AMN1	Bergheilysin OS=Plasmodium berghei (strain Anka) OX=5823 GN=PBANKA_1137000 PE=4 SV=1	133.4	0	0	0	47194	0	0	0	0	0	0	0	26654	0	0	0	0	0	ND	ND	ND	ND	2	3	2	2	MKLMKVLGYINIITNCVNGILCKGDKKRYSIFTNNYIYSISTLNNYSFAATMNKMPAWVNEKCPEHKSYDIVEKRYNENLNLTYTVYEHKKAKTQVIALGSNDPLDAEQAFGFYVKTLTHSDKGIPHILEHTVLSGSKNFNYKDSMGLLEKGTLNTHLNAYTFNDRTIYMAGSMNNRDFFNIMAVYMDSVFQPNVLENKFIFQTEGWTYEVEKLKEEEKNLDIPKIKDYKVSFNGIVYNEMKGAFSNPLQDLYYEVMRNMFPDNVHSNISGGDPKEIPNLSYEEFKEFYYKNYNPKKIKVFFFSKNNPTELLNFVDNYLCQLDFTKYRDDAVEHVNYQEYRKGPFYIKKKFADHSEEKENLASVSWLLNPKKHKNSDTDLSLESPTDYFALLIINNLLT…
PBANKA_0823100	A0A509AH44	S-adenosylmethionine synthase OS=Plasmodium berghei (strain Anka) OX=5823 GN=PBANKA_0823100 PE=3 SV=1	45.1	0	42956	21404	24035	0	148698	136103	83917	33255	0	0	28365	0	0	0	0	0	ND	ND	ND	ND	2	17	2	7	MDQLKIKRGNFLFTSESVNEGHPDKVCDQISDAILDACLKEDPESKVACEVCAKKNFIFIFGEITTKAKVNYDQVTRNVLKHIGYDDEKKGLDYKNAEIKVFIDEQSPDIAQCVHENKQPELIGAGDQGIMFGYATDETENYMPLTHHYATLLGKRLTEVRKLGILPYLGPDGKTQITIEYKNKASGVYHMEPIRVHTVLISTQHSENVKYEQLKSDLMENVVKYVIPEKLLDKDTLYYLNPSGKFVLGGPAADAGLTGRKIICDTYGGWGAHGGGAFSGKDASKVDRSAAYYLRYIAKSLVANKFCRRVLVQASYSIGIANPVSLNVNSYGTVSTGYTDYDLEQIILRNFDLRPGFIIDELKLKEPIFSKTSAYGHFGRDDQSFTWEKVKDLTHEKNV…
PBANKA_0709100	A0A509AHC5	60S ribosomal protein L22, putative OS=Plasmodium berghei (strain Anka) OX=5823 GN=PBANKA_0709100 PE=3 SV=1	16	0	0	0	0	0	118941	0	0	0	0	0	49421	0	0	0	0	0	ND	ND	ND	ND	2	2	2	12	MAVKKDLKSAKKNTGKNAKKISKVLGKKSKIVKSTKGVKYILDCTKPVKDTILDISGLEQFFKDKIKVDNKTNNLKNKIAVSSDDYKIYITVHIPFSKRYIKYLAKKYLKMHQIRDFLRVIAKGKLAYEFKYFQLNNE
PBANKA_1228000	A0A509AMF7	1-cys peroxiredoxin, putative OS=Plasmodium berghei (strain Anka) OX=5823 GN=PBANKA_1228000 PE=3 SV=1	25.4	0	0	0	0	0	132586	133480	134089	0	0	0	102412	0	0	0	0	0	ND	ND	ND	ND	2	9	2	9	MGYHLGAKFPNFTAKASGINGDFELYKYIENSWAILFSHPNDFTPVCTTELAELGKMHEEFLKLNCKLIGFSCNSKESHDQWIEDIKHYGKLNKWEIPIVCDESRELANKLKIMDEQEKDINGLPLTCRCLFFISPEKTIKATILYPATTGRNAQEILRVLKSLQLTYKIPVATPVNWNESDKCCIIPTLQDDEISKYFKNEVTQVEMPSKKKYLRFVDL
PBANKA_1441400	A0A509AR08	Proliferating cell nuclear antigen OS=Plasmodium berghei (strain Anka) OX=5823 GN=PBANKA_1441400 PE=3 SV=1	30.3	0	0	0	0	0	0	0	0	0	0	0	111185	0	0	0	0	0	ND	ND	ND	ND	2	2	2	15	MFECRIDGQFFKKLFETLKDICTEVNLECDENGIKMQSMDCSHVSLVDLNIMSDFFQHYRCDKKCVLGISINFMLKILSVIKEKSTVFLFKEDNENDAVLNIGIIDEEEQSSTEDSLEIQVKLINTQKEHLEIPQSEYHCQCTMKSKKFQEFTKYLNSIGDNVSISMKKDTMILSTTGSDIKVTKQFTNDMPDVSITCSKYVSQEFATRYLVMFSRASALSDEVLISLSPNIPVSIKFNFKQQLTELPDNSHLTFFLAPKIGEY
PBANKA_0832600	A0A509AJG6	Proteasome subunit beta type-6, putative OS=Plasmodium berghei (strain Anka) OX=5823 GN=PBANKA_0832600 PE=4 SV=1	31.7	0	0	0	65854	0	210806	78846	89648	0	0	34863	123420	0	0	0	0	0	ND	ND	ND	ND	2	10	2	8	MEIEPMKIYNINQDSINNEYNIRTPISDGTTIIGIIYEHGVMLACDTRTSSGTFVSNKCSRKINRINENIYVCRSGASAHSQKVIEVIKHYCASMKSENRKKGRFHENEVITDDINDEEIDIDQINNINNNNVIAKNKYYYNDKFMDYNPLVENVAYITKKLIYANNNFLSCGLIFGGYDKIKKQQLYSVNLNGSIIQKYDYAVSGSGSIYIQSYLQDKYKKNMTKKECFDLILNCVKYAIYNDNSSGGIVRILNITKNFVEEYTITNTQIHFDY
PBANKA_0926700	A0A509AQ14	Exported protein 1 OS=Plasmodium berghei (strain Anka) OX=5823 GN=PBANKA_0926700 PE=4 SV=1	17.9	0	0	0	0	0	0	0	0	0	0	82053	146607	0	0	0	0	0	ND	ND	ND	ND	2	5	2	16	MKINIASILFIIFSLCLVNNAYGKNKHGKTGSKNVIKKPAEPVIDVQELISDMVKKEEEIVKLAKNKKSLRKANVALATALSVVSALLLGGAGLVMYNTEKGRHPFQIGKSERGTSEDSKPTNSPVDDESSLGFSSEGIQNFASTAREAMLKDDIATPLNMPNLQQ
PBANKA_0610400	A0A509AJJ3	Non-SERCA-type Ca2+ -transporting P-ATPase, putative OS=Plasmodium berghei (strain Anka) OX=5823 GN=PBANKA_0610400 PE=4 SV=1	167.8	0	232425	81862	295396	0	0	345371	268085	0	0	0	150729	0	0	0	0	0	ND	ND	ND	ND	2	12	2	11	MSSEKQSVIPNRANIKGETNNNPNNKTNDALNSPVNNNSTIVENGQNTVVVNKNSVNTNIQNSKIGEKNVDEHSIPQKRRPSERERRSQKVERTQTEKVDAGRRRGEIDKIEKSKTENVDVYRKGEEIDKIEKSKTENVDVYRKGEEIDKIEKSKTENVDVYRKGEEIDKIEKSKTENVDVYRKGEEIDKIEKSKTENVDVYRKGEEIDKIEKSKTENVDVYRKGEEIDKIEKSKTENVDVYRKGEEIDKIEKSKTENVDVYRKGEEIDKIEKSKTENVGDEKKIETIVNKKKDGEETDNKGMLTKVKLEEENQLIESDVEKEKGEGYRNHYASESIEKLCKEFDLADINIGLSFEQVKINRERYGENHIEKDSITPIWLIFLSQYYSPVVMLLLIAAM…

## Sheet: Supplementary Table 2 ARPC2-YFP
																					ARPC1-YFP nonact vs GFPcon		ARPC1-YFP act vs GFPcon
Number	Accession	Description	MW [kDa]	Abundance - Top N Average: GFPcon nonact I	Abundance - Top N Average: GFPcon nonact II	Abundance - Top N Average: GFPcon nonact III	Abundance - Top N Average: GFPcon nonact IV	Abundance - Top N Average: GFPcon act I	Abundance - Top N Average: GFPcon act II	Abundance - Top N Average: GFPcon act III	Abundance - Top N Average: GFPcon act IV	Abundance - Top N Average: ARPC2-YFP nonact I	Abundance - Top N Average: ARPC2-YFP nonact II	Abundance - Top N Average: ARPC2-YFP nonact III	Abundance - Top N Average: ARPC2-YFP nonact IV	Abundance - Top N Average: ARPC2-YFP act I	Abundance - Top N Average: ARPC2-YFP act II	Abundance - Top N Average: ARPC2-YFP act III	Abundance - Top N Average: ARPC2-YFP act IV	#ARPC2-YFP act samples detected	p_value	log2FC	p_value	log2FC	# Peptides	# PSMs	# Unique Peptides	Coverage [%]	Sequence
PBANKA_0929300	A0A509AII0	Actin-related protein 2/3 complex subunit 1, putative OS=Plasmodium berghei (strain Anka) OX=5823 GN=PBANKA_0929300 PE=3 SV=1	44.9	0	0	0	0	0	0	0	0	47918	0	0	0	83352	559025	182714	48661	4	0.0110882	0.784356	1.56567e-05	2.08382	10	23	10	26	MIEYLKCNCVKYSIPDEEYNIPIKLSPNKKEMLIAVVNTKNNIVLYKIINTEIIYFDILYTGSRNKIIGLEWSAKNELLIVTIDMKCVIFKKNQKGKWECTNVNISTEELPTCVCWHPHANTFAIGFSSGAIFICSLKEKKKWVIKKVENHTGSILFLDWSSSGYILSTSSLDSTSLLIYTPNIVDEETNNKDNLKLHRKFEECIAERNFKNNDIINKIECTGYILCHSSFSLSNEKVAIIASSFDNSCKKQKIIISDFLKSPINIQSVTWVGQTLQKCLFLDNERLLVYGYEVFPIIIECINNEWIISRVVLPEFIIKNLSVDFFYDKKSIKDIEQTCNELNGNEIIGEIVAHSNSILQLSMLETCEDMKNGKFVTVSSDFNVVIWNYNL
PBANKA_1007500	A0A509AML7	Actin-like protein, putative OS=Plasmodium berghei (strain Anka) OX=5823 GN=PBANKA_1007500 PE=3 SV=1	48.1	0	0	0	0	0	0	0	0	30089	34560	38589	0	55946	944090	0	108452	3	0.0907499	0.568327	0.000192137	1.99592	18	52	18	66	MQNQEDRKNVPVIIMDPGTWKIKIGFATDDLPTFEMPCIYIEKEMTNSKIVKFGYDAIEDYTLIKYGHNKYKEAEKCESTKDEQLVNVSTVFADPRHPLSKNQYPHLLEVYNHLIMKLNINTCDYNLLVIIPEMVEKLYATNLLNWAFKIHDFCSISFIYNSLAASYYYGLKTALIVDLGESASRIVPVAENNGTFLEFAKISEINGYLISNYISNFVKINDNYIDYILIQDYKESNSYVSLDIDNNIKILTECNGIIKPYKIPYNNNIYIDPKGEILSHEIYFKPEFLAHLPGNFYKQNIISLSQLIFEAVSSCPIDLRKVLLNNIILVGGVSNCINMPDRLHKELNKILRIKNFSENTIISIKHIRMADIASYLGGKKYAKIIYSNKKKWITKNEYS…
PBANKA_1014200	A0A509AMR4	Arp2/3 complex 34 kDa subunit OS=Plasmodium berghei (strain Anka) OX=5823 GN=PBANKA_1014200 PE=4 SV=1	48.1	0	0	0	0	0	0	0	0	52201	58549	0	0	32940	759387	464526	329802	4	0.137658	0.540584	0.000325315	1.94966	22	66	22	59	MCEVLYKKIKETECESNLHVSNNKVLFDWIYKVIKYGIPVPSSYYSNEKIVDKETNRYVLTEYIYDADNIIYKVEAHTKIKLEKIVNMRVKCLDEEYLINNEVEKLYLDDKYNELDSIQIYISYNNFSNVWNDDTMQYFVKCYNDNNFKTHIHILEKEEFGYDIQIELYEIPKDPIKSFLISNHLSRIREALLSGPFMHFFLTKINLSENILQKFIIRKNEVIYIAKIDSCVFIIISIHYKDIYDKYVVLGLCKNIHFVTKTMDLSGNLDCTFYSNFPSHLISSDLFIYNKNEDKNNYDTVIIECDKKKENTDENVEENTEKNLGEYISTYKQLQTHSATCEENDTSKFPNVGFISIKVDAKLFNNCKEFSELIKIASRISHIIVSFREFLNNSLVLYR…
PBANKA_0612300	A0A509AF39	Uncharacterized protein OS=Plasmodium berghei (strain Anka) OX=5823 GN=PBANKA_0612300 PE=4 SV=1	99	0	0	0	0	0	0	0	0	0	0	0	0	0	257676	324060	101070	3	0.100038	0.532801	0.00488726	1.7368	16	37	16	24	MDNKDEITSIGNKNKDEEIFKLRKLVSIFKNECKKLKEENDNLKKNERSESLEKKNESNVENSDGNVSEYGTDIQEKNEIIKRSIIEKSYKKLKDFTILLEDRLKNVKLESEKKCVELENKIEECNKNKKIYITEIGNLKEKLREQNSVIDGLNKKIEEYKIYLRSEKNVQACYENNIDQTIEYKIEIRKLKENIETLKKNNEITSKERQQYRSMIILCSQYKEKCKQIPNFQNKIDLLENQIKEMEIYKYKDNENIKKLTELKNTIINNQIENNNLKTQLNEWVNFAKIYINSKSINIDTLKKTMNELNNKYNEANSTKTDLEFKYRKIVVDIEVQKQLLEDKNFELKILKNKNMRLEKKYEFLKKDYLLEFTKNSTHISTTSILQNKNDEKGNEDNY…
PBANKA_0811800	A0A509AIH3	Actin-like protein, putative OS=Plasmodium berghei (strain Anka) OX=5823 GN=PBANKA_0811800 PE=3 SV=1	67.7	0	0	0	0	0	0	0	0	79650	109230	61766	0	0	960018	378241	515909	3	0.00826302	0.963812	0.0059857	1.6461	30	94	30	56	MSMNKKDEIPTLYSPIEKNLYGKLNNPIEPYIYLEHSLPSSEKKKKLNRRISFSSFSNTTCSDILKLNNYLDIKNNILLLSLNNYSFKVGLVNKYDYTLQSLRLPQMEIIETWRELGYMYPPYKNYDILEECIYHCFSNIYKMDLKDQDLFIPLSSKNNMKDFSAIGDILFNSFQVKNIAFKEPSFVSSLIILEELKKKKSGIQIYREETNKECEFIYYNDNSNNHDVYDENQYDQIFNKDDIDNEEEASHIENSSCNLDSAENQNSKKLKQMSNEQNKKISQKDDIKNNGKEKNSNESLIKLRELDIFNFTALLVNIGSTKTTCTPVINGIPLPDLTSIYYIGGYDIDNQIYDEMKKNEMHQKEISMNIAKIAKEKRVFTPQNKDESEYLSILYNKNP…
PBANKA_1229300	A0A509AQK9	Uncharacterized protein OS=Plasmodium berghei (strain Anka) OX=5823 GN=PBANKA_1229300 PE=4 SV=1	68.8	0	0	0	0	0	0	0	0	0	0	0	0	0	284711	0	82278	2	0.637073	0.158664	0.0311072	1.4312	8	16	8	21	MKRYSEGNEKIFNCVKNKKSKKNNSSFDLLYDCKEGYSFCKKNNFNNLNGLLIEKNIFLFNFILSIKYNKEKKKTKNSEKDNEQHEDNKLNLYYFFQDKKIFINHDNLENIKTEQTSIITENFQEKTKENSDFDDKKMDIFYEKKFKFLLKHNYFFYMKRYIHNILTNVDICTHDKPNETFFEFFSIFKNKKKKICFENSNELLSDVYFDVSEVTNDSDYNYFYEKANQIIEFEDEHMEINNEEELFKTKIEKSNSLPNNLEFNKNDNFIKFEKKKFVISGDNEKKNKEKKFEKYICRCCLKQKKDMHNFYNNNGDRENILCTKFSNVCLLQIFMSNLTKNELSFWGKIKDYIENMLGNIKSNIFYKGMSNYVEMPYVEIIDKIKNRNSFQKNFKFIKK…
PBANKA_1000600	A0A509AKD8	Erythrocyte membrane antigen 1 OS=Plasmodium berghei (strain Anka) OX=5823 GN=PBANKA_1000600 PE=4 SV=1	35.8	0	0	0	0	0	0	228265	0	18818	139333	89707	0	31101	587424	8837264	0	3	0.316628	0.435545	0.057193	1.25495	10	64	10	40	MKVISLGLISSIIFSIFLAKKNSGSNSTTGCFPFCKKKKNGVDHVYELAKSTDCDPKGIDYDPDLPNLKFIDEPTSVVLEVCNERKSKLSELFASEIDDTVIDQVNGFLRRENKSSKKGWYVRPYEEYENMINIKFISVDNDAQPLQHSLNIAHKLSTSPEPPKVFEKHRSSPISETDTSIPHENDESTLHEDQELDDEVTSYLGDGENTNEDQELDDEVTSYLGDGENTNEDQELDDEVTSYLGDGENTNEDQELDDEVTSYLGDGENTNEDQELDDEVTSYLGDGENANEYEAEEDDAGEEQEDEDAAPYLGDKDEE
PBANKA_0309100	A0A509AH58	Eukaryotic peptide chain release factor subunit 1 OS=Plasmodium berghei (strain Anka) OX=5823 GN=PBANKA_0309100 PE=3 SV=1	48.3	0	14712	15607	54055	12074	20968	100932	95921	76087	34125	60575	0	15355	644754	5415153	44465	4	0.843278	0.0772279	0.0637053	1.22232	17	87	17	50	MEVDRDANVEQWKIKRLIKKLENAKGNGTSMISLIIRSKDEVSRINKMLADELGTASNIKSRVNRLSVLSAITSTQQKLKLYNKTPPKGLVVYCGTVVTEDGKEKKMSIDFEPFRPINTSLYLCDNKFHVEALKELLESDDKFGFIIVDGNGALFGTIQGNAREVIRRFTVDLPKKHGRGGQSALRFARLRLEKRHNYLRKVAEVSTSVFITNDKVNVLGIVLAGSADFKNDLLHSDLFDQRLYAKVIKIVDISYGGDNGFNQAIELSGEALQNVKFIQEKKLIGKFFEEIAQDTGKVVYGIEDTLKALEIGAVELLIVYEGLDIIRLTTKNNVTNQTKTMHIFPHDEKQESLYKENNVELEVVEKILLTDWIINNYKKYGASLDFVTNKSQEGAQFQK…
PBANKA_0506700	A0A509AEP6	Citrate synthase OS=Plasmodium berghei (strain Anka) OX=5823 GN=PBANKA_0506700 PE=3 SV=1	65.2	0	0	0	20886	0	0	0	28810	33485	67659	29102	42304	0	140935	0	34310	2	0.00782518	1.18348	0.0721481	1.17857	6	16	6	14	MKKIRNISRNAAFTKNKRDFDIFKSQYKKVFFHSAQKKKICEKQLNICNDKFVNENKTYIPSVYSCMFPIKKENILNKNHARYFSTNNINEPNLYIENYSKIKQHINTIDGEESIIMNILKEKTHDCIKKTREQLKTIIYTYPNTPISICTPNNVIGGLRNTIALITDTSILEKKKGILFRGRSVDRILKDFPKWDETCKYPMAEAMLWYLLTKEIPGVENLKLFSRELYCRANKIPQFVFEFIDSIPPFTHPMSQLISTVSFLESLSLFKIKYSEGILKKDYWKYILEDAVSLIAQIQVVGAYIFKRTFIDNSIKKGEGINLDIDLDWSANFSKLIGYDNNQVKDLLRLYFLLHSDHEGGNASAHVSHLIGSTLGNPYLSFSGCAIALYGPLHGLANQ…
PBANKA_0623300	A0A509AJW4	Tryptophan-rich protein OS=Plasmodium berghei (strain Anka) OX=5823 GN=PBANKA_0623300 PE=4 SV=1	41.9	0	0	0	0	0	0	30191	0	0	31060	0	0	0	100568	1201247	0	2	0.265754	0.333113	0.092697	1.1779	9	17	9	28	MKKKYAASYISCSLFLAYFFLIDLISSASFDPTSTEKLFDDDEAKACDNKILQFQNPLSENNPLRDENYLRGSNSTKRETPCFEEPNFTIDDIIDTDIWLDQLYIKWNSLIRSSREQIETEEQIKKNEWHKKLTELEEEWEKFYSYISTKKDVWLKKKNDEWNTWIKKMESKWIAYKGHIDNELYDSIERCSPEDNISIVNQLKSNVEQNMIEDLKKWIDKSDHNLYKWIICDWNKWKSNFMLDWSKQQWKLKEDSYWKKFTKPKTRTDPFFFLIKEKYDKWAERNKMEQDQWTDITSKLESKYLTAKHADWEEWKINKREWYGKWISYYIENFVNMRAVCR
PBANKA_1101400	A0A509AK46	Rhoptry-associated protein 2/3 OS=Plasmodium berghei (strain Anka) OX=5823 GN=PBANKA_1101400 PE=4 SV=1	45.7	0	0	0	0	0	0	16553	0	20593	0	0	0	0	49579	719864	0	2	0.075534	0.656153	0.0924351	1.17385	7	15	7	21	MNTKIFMYFFVSLFLCHVVYGDKCSIPLKDIKFQNFSLFNLIKSHDDTEGRLSTWIHFFFNRIHDPYYAGNYMKHFNINTINVEDQPCFIRAFNIYMIHTHANKILSVTENEENSFHKDKYSSIKDYLKDFFWVAETKSVHKYLDDLLLNIHEIDNAKLDLSLIKDLVTKASVNTPAKFIDDPMKALENIKLVEEVNDKRIDASKHASRDYKLLAILSLKNHYYNADLTHPIPSVRDEIDSMIRLWFRKRSKLFPLYKNPLILEDNTRCSKTNLKCYPTPDDLVQAFFSAIKEKMLKIYIRFLDNFSIAIQNKSYKIDGLKGMKFLKSLFQRKTFPNFVKLNSDYISSELIFLRESFFDALDSTLNCYTNKYMNLPGDIYLDTKMVGA
PBANKA_1101300	A0A509ALH3	Skeleton-binding protein 1 OS=Plasmodium berghei (strain Anka) OX=5823 GN=PBANKA_1101300 PE=4 SV=1	90.1	0	0	0	0	0	0	18748	0	0	0	0	0	0	55765	619637	0	2	0.0170301	0.784208	0.0979162	1.14036	3	8	3	14	MDNQISTYAPESIASNILLDSFSTKPQNTLHTLIDTFNPELKNKFLDKENKFQDTENKFQDKENKFLDTESKFQDTENKFLDTENKFQDTENKFQDTENKFLDTENKFQDTEKKFLDTENKFQDKENKFLGTESKFQDTENKFLDTENKFQDTENKFQDTENKFLDTENKFQDTEKKFLDTENKFQDKENKFLDTESKFQDTENKFLDTESKFQDTENKFLDTENKFQDTENKFQDNRKESKFQDTENKFLDTENKFQDTENKFLDTENKFQDTEKKFLDTENKFQDKENKFLDTESKFQDTENKFLDTESKFQDTENKFLDTENKFQDKENKFLDTESKFQDTENKFLDTENKFQDTENKFQDTENKFLDTENKFQDTENKFLDTENKFQDTENKFLD…
PBANKA_0314700	A0A509AFG8	Replication factor C subunit 2, putative OS=Plasmodium berghei (strain Anka) OX=5823 GN=PBANKA_0314700 PE=3 SV=1	37.6	0	0	0	16963	0	0	37032	0	24400	38165	16989	0	0	77915	1466205	0	2	0.239182	0.410267	0.118927	1.09583	14	39	14	52	MSNLPWVEKYRPKKLDDIVHQTNAISMLKEVIKTKNMPHLIFHGPPGTGKTSAINALAHELFGKENINERVLELNASDDRGINVVREKIKAYTRISISKNKINTETNEQLPPWKLVVLDEADMMTEDAQSALRRIIEIYSNVTRFILICNYIHKISDPIYSRCSCYRFQGIPINIKKEKLLYICKNENIDISDNALSKIIETTQGDLRRAVSVLQLCACIDSKITVDSVLDVSGLPGNDVILKIVNSCKMKNFKILEKTIQDIIEDGFDVSYIFKALNEYFVMSQDINDSIKYQILMELSRHDFRLHNGATKYIQLMSFASSVHSLLNQA
PBANKA_0523100	A0A509AGN1	Eukaryotic initiation factor 4A-III, putative OS=Plasmodium berghei (strain Anka) OX=5823 GN=PBANKA_0523100 PE=3 SV=1	44.7	0	0	0	0	0	0	0	0	0	0	0	0	0	10945	2332358	0	2	0.19408	0.303363	0.150087	1.04358	10	23	10	42	MDKEETYKSSEKLEICTSFESIGIDEGLLRGIYAYGFDRPSAIQQRGIKPILNGRDVILQSQSGTGKTCVFAVGALNCVNRNLNETQIIILSPTRELAEQTQKVCLALADYIHVTVYCCIGGKKLSDDIKALNNGVHIISGTPGRIYHMLNLRHLKCKYIKQLVIDEADEMLNKGFKEQVYDIYRFLSPNTQIVLSSATLPHEVLEITNKFMHNPVKILVKRDELTLEGIKQFFISIEKEQWKYETLADLYESLTITQAVVFCNTKLKVDWLAKKMQESNFTVCKMHAGMSQSERDDIMLKFRQCKYRVLISTDIWGRGLDVHEVSLVVNYDLPNSRECYIHRIGRSGRFGRKGVAINFVKNDDIKILRDIEQFYSTQIDEMPMNITELL
PBANKA_0836800	A0A509AJ70	Erythrocyte membrane associated protein 1 OS=Plasmodium berghei (strain Anka) OX=5823 GN=PBANKA_0836800 PE=4 SV=1	38.2	0	9770	41092	0	0	0	232476	0	45239	106203	86069	0	12225	806227	6697245	0	3	0.197752	0.501655	0.141109	1.03829	16	91	16	65	MVKIHIEKFFFAVNLFLYLSDKCFAIEHASSSDTINEDEKVLVNTTLQETISSNDVSQNNSTDIDSTLKLVSSNFDLPKFASSSISLKNGKSQVCTDPEEIKKVTEIMDEAVYRLKYHSNFNNGYNHYYVGNEELSLCFTEDNGIKFERFHLVIPNPDNYEEIVKMFYTFRGIPYMDNFDFTEKLVHEYYSNLSLMYNSYESRTTPFCGYSFVLSADIQVSEDITMFVQTSVDIDDHNEFDTEKYKNTIVESANSLNIDVYANEYDQMENKTKLFVNLSGIIVKKKSDSVRVTYVNSIHNGDSFPKDFCDKQFRVKNMLYLIDLLKNSFK
PBANKA_0912100	A0A509AJJ7	Casein kinase 1, putative OS=Plasmodium berghei (strain Anka) OX=5823 GN=PBANKA_0912100 PE=3 SV=1	37.6	0	0	0	18139	0	0	103650	24986	11589	0	9679	0	0	36002	4282878	0	2	0.723696	-0.127994	0.153219	1.01645	19	51	19	55	MEIRVANKYALGKKLGSGSFGDIYVAKDIVTMEEFAVKLESTRSKHPQLLYESKLYKILGGGIGVPKVYWYGIEGDFTIMVLDLLGPSLEDLFTLCNRKFSLKTVLMTADQMLNRIEYVHSKNFIHRDIKPDNFLIGRGKKVTLIHIIDFGLAKKYRDSRSHTHIPYKEGKNLTGTARYASINTHLGIEQSRRDDIEALGYVLMYFLRGSLPWQGLKAISKKDKYDKIMEKKISTSVEVLCRNTSFEFVTYLNYCRSLRFEDRPDYTYLRRLLKDLFIREGFTYDFLFDWTCVYASEKDKKKMLENKNRFDQIADQEGRVKQN
PBANKA_0916100	A0A509AJN1	Nucleic acid binding protein, putative OS=Plasmodium berghei (strain Anka) OX=5823 GN=PBANKA_0916100 PE=4 SV=1	31.8	0	0	23771	33208	0	0	30340	0	47610	0	44480	0	0	54942	902348	15446	3	0.0996029	0.733383	0.162283	0.977707	8	25	8	38	MDMNFGFGNDSFFEQGNRSTDKEEVEEINKIESNEIGKENGKIDEEKELPKELCAPITIKLLLNKMMNSENFEIHDFQISGIIVFGKITNVKELASAIIFEICDYTGTIEAKYNKDAKNDKIKNHIENLKVNDHVKIVGGVYSPESKTEQVQISISYINKVDDWVSYFTYFTSDIIYCYLKLLKLKNMNMSNGTNNQEKPWSHINLDSYYNQMDEIDSDIIKYLHTTTEKYANQDDIFNNLRKYHSEIDIKKSLTKLIEQYDLAQYEDIISIP
PBANKA_1455100	A0A509ARE2	Replication factor C subunit 4, putative OS=Plasmodium berghei (strain Anka) OX=5823 GN=PBANKA_1455100 PE=3 SV=1	37.6	0	0	0	15991	0	0	67635	11941	19593	21487	24094	0	0	22819	1569743	0	2	0.33334	0.357055	0.190884	0.953295	12	36	12	52	MEEDSFKNRLLKRNIDIWIEKYRPEYLEDVVGNPFVINTLKSIIVSGNMPNLLLAGAPGTGKTTSILCLASEMLGSQAKKAVLELNASDDRGINVIRDRIKSFAKEVISLPPGRHKIIILDEVDSMTTAAQQSLRRIMELYSDTTRFALACNQSEKIIDALQSRCAIIRYFKLTDDQVLKRILKICEYENIKYTDDGLETITFIADGDLRKAVNCLQSTYAGLEVVNKENVLNICDIPSPERIENLLKHCISSEWRKAHDIAYDMIKEGHTPFDVALTSSNVLRRYDLGSEAIQIEFLKIGAMACNTMASGLSSVIQMDKLIADWCIAAKTLRGKC
PBANKA_0917400	A0A509AJN7	Armadillo repeat protein PF16 OS=Plasmodium berghei (strain Anka) OX=5823 GN=PBANKA_0917400 PE=4 SV=1	57.7	0	0	0	0	0	0	29439	6253	0	12380	0	0	0	8737	1385366	0	2	0.565777	0.189724	0.215122	0.899906	12	23	12	28	MSKVIHQIFDDYNKSRIQFTQSVSDLCLKPHNIEILINTDIINLLRPLILDKVPIVQQNATVILAKLASYSEEVALTILQNDVLPHLIYCLKHENKNYRKNCAYTLKCLANHNSKLANIVAEGNCIDYLMDCLDEYDLRVKQSCINALCAIIKNDLELSNNVVDKGIIPLLILCLQEKDNNLIKSSLNMLSELCKQSDEIAKNVVDNNVLPNLIKFLDNNDNYIKKNACNCLSQIAKHKEELTELMIENDIFPKILYLLKDNDDIVKKNCANCLKEMSKHNEDICKIIVRAGALPLLCECIEQSSKDTIKLPAILCLGFISSFSESLSLNIILSNTIPILKKSMIEETEDYIKSACVWAVGNIGKHSTEHAKKLADENILIILVNLYNSNESSDDLKKK…
PBANKA_1340300	A0A509AQC7	Phosphoribosylpyrophosphate synthetase, putative OS=Plasmodium berghei (strain Anka) OX=5823 GN=PBANKA_1340300 PE=3 SV=1	48.2	0	0	0	0	0	0	36569	27603	19998	49838	0	0	0	40467	853277	0	2	0.238426	0.468895	0.207978	0.89489	8	21	8	26	MNYSAFKGYASNWLNRKSILMKKGNGSKIALIASSGIGMYILSNEENRKELRSRCNNIKKCIDNMVYQYNNKNKIFFENLVLCDNNNSNKGFRNPLWRSEEKRPIDKMENAIIFSGSSNPLLSKKITDHLSTTLGKVNLKRFADGEVSMQFLDSIRGKDVYIIQPTCPPVNENLIELLLMISTCRRASAKKITAVIPYYGYARQDRKLSSRVPISAADVARMIEAMGVDRVVAIDLHSGQIQGFFGPRVPVDNLEAQLIGLDYFTKKNLYKPVIVSPDAGGVYRARKFQDGLNYRGMSDCGIAMLIKQRNKPNEIEKMDLVGNVYDSDVIIVDDMIDTSGTLCEAAKQLKKHGARRVFAFATHGLFSGPAIDRIENSPLEEVVVTDTVKSNKNIDNCKK…
PBANKA_1102200	A0A509ANJ5	Merozoite surface protein 8 OS=Plasmodium berghei (strain Anka) OX=5823 GN=PBANKA_1102200 PE=4 SV=1	46.7	0	0	22820	20657	7366	5560	217538	0	134651	170056	101733	0	0	179621	3854687	0	2	0.100777	0.784378	0.187131	0.881511	12	50	12	47	MKRSSQIIIFLLLSLVCKFSIGICKENGNGNINKSNNNRVIKKERKRKAKSNANKNEPENKEHEIINLYDDVQELLGNERMSMLDKYSILGIDDCSNESENNKIIGEYDLKAMKSVLLYKNRISKVSLENLYDVKTVFKRCFNKDDPELSKSYEHLQDQAAIEGTTIIDYLSNYILNVYVKMNDEFIKNDGFKLSKYIPELEIINYALYNGPKELENRIKSGLNEINNIIISESLTSIYSSVVSGLNINCKIKDDLITILNLSDGKYFKVDFSSQATMIVPGQYSHEHGNMKKISEYFIEKNRICKNEKCPINSNCYVIDNVETCRCIPGFSKNKESESLKCDIDESTSCENNNGGCDVNATCLLLEDKIMCECNNKYNGDGIYCSNAIYYGMNVFVFF…
PBANKA_1463000	A0A509B231	Osmiophilic body protein G377 OS=Plasmodium berghei (strain Anka) OX=5823 GN=PBANKA_1463000 PE=4 SV=1	309	40868	0	0	0	0	0	286797	0	84580	86197	171330	0	0	93720	8602889	0	2	0.244489	0.521592	0.203655	0.869818	134	481	134	54	MKILLYTFLFCICSGFAKCQKAYNFDNIIKYLKEIKVIPSYIPDKLEENIQLIPPYLVYKYKNRIYYIHNNVDIYPVINKKPKPVFPIDPDDTYECTHNNIKNTVDDEVEEDDDTVDINSFVPDNETGMFVPNINDIKEQAGTSDEFEIPKNNQVLIDQNGSNAIVNIFETEGCTNYLIGELVEFRKNKEICENIKTEFEIFNKDNIYEYNEQDEKTPTHNIEISDFYTFLNAIHILFHEDEYNKYYTINNVSVKDIKLFIKEAYINIHNSLKTYILFSGLNFSDYTYSPKEFSIDALLNDFFHLTNDSNDNMNGSFENIERIIKYVATSKSRLTIKLVENAIINFLDEQNLMVLDIKLISHIFSTNRILNYNENDIIKYAADLVNISEIDISPRIIST…
PBANKA_1012800	A0A509AQY7	Voltage-dependent anion-selective channel protein, putative OS=Plasmodium berghei (strain Anka) OX=5823 GN=PBANKA_1012800 PE=4 SV=1	33.3	0	0	0	0	0	0	0	0	0	23308	0	0	0	32430	68388	0	2	0.95023	0.0305478	0.197341	0.868128	4	7	4	19	MDFPKLLNKPSLDLIKNDFPHSNKFELEHISVSKQPFLKSGFTFSNNTYNIYTNFKNNVYNTKNELKFDNSGISLLDIKYEPNFVKNLNICGKYTKSNEKKEDSFEVYGEYTSENMSIFSSINVRNFFFKYIHVGSHPKCPNFKFGGMVQGDLDYKNLQYSLGGAYTKNYFDKQYIFSFRSLPTNKCLYGTVALNLFFQNKNINDNAVSIELLQNILEKKATINIASIWYLNDKNTAVKTKISNDTKVALSLTHKYNEFMTISLGSQVDITKMSLPDSSKFGIKLYLKS
PBANKA_0936500	A0A509AK58	Replication factor C subunit 5, putative OS=Plasmodium berghei (strain Anka) OX=5823 GN=PBANKA_0936500 PE=4 SV=1	40.5	0	0	0	0	0	0	80578	0	49583	0	39040	0	0	117560	1931493	0	2	0.396565	0.312926	0.217504	0.865469	7	20	6	26	MWLEKYAPRNLDELNIHKDITARLKKLSVHNDLPHIIFYGAPGGGKSTRIDCLIKEIFKDEKIIRRPENITNTESKININVIQSNYHLELQCFELGTKDKIIVQNIIKELCSYKSSASFFSKRPMYRIFVFKDAEFLSEGAQAGLRRTLETYIRNARVILHLEHLSKIIEPLKSRCICIRVPLPTEEEIFTVLKNICDNENVSSNYNSTNFFKTLINIHGRNLRKCIMALEMTVYSNSDKPHHSISVAHTYINELCNFVFINPTQIKIKECVTKIQSLITCQIPVNFIFETTIKYLLNSKYDNKLKYYFLRLSSHFSYLSECSYDKSISLIAFIINANTAILKYSSSKK
PBANKA_1039600	A0A509ANI5	26S proteasome regulatory subunit RPN6, putative OS=Plasmodium berghei (strain Anka) OX=5823 GN=PBANKA_1039600 PE=3 SV=1	73.1	0	0	0	43982	0	10545	43647	0	0	21161	0	0	0	16102	1283831	0	2	0.94812	0.0281768	0.230511	0.863563	14	28	14	31	MEAFEEIESAYKEIEDEIIRSVDSLCDGNYLKIKDEVIMPHMSDSLIEKIIILNRHINDNSNPKEFEKKVTNEKVMQINDKLIYLLCDYYINKKDIENLINFTTSNENYFSVLPQAKTAKLIRNIVEKISKKIRNISTLYIIFKKYMNWAYEKKRNFLRCRIEVKIIILFILKQKYKTALSLIERLLKEVKKVDDKALLLELYIVETKIYMLLKNSTKMKASLTFAKNIANTINTAIYINSEIDLLSGILYIYEKDYRSAYIYLYECYETLYTYIYNSQNNTLDFLSKKHNDFYSVIIHNIINTSTISSQNRTKSISQISPFLLSFYTFYEYYDSSNSLLNVDEINLLSNNVNLIYSDIICKNSSSYQELDEEKMYCITNPIELNYELIKNLTIDNYGN…
PBANKA_1122800	A0A509AP87	Ribonuclease OS=Plasmodium berghei (strain Anka) OX=5823 GN=PBANKA_1122800 PE=3 SV=1	33.3	0	0	0	0	0	0	0	0	0	0	35802	0	0	38786	457795	0	2	0.300627	0.41849	0.23034	0.838619	2	6	2	12	MEPILIDNLYEFGNEEVRLGIDEAGRGPVLGPMVYSGFYCKKEDEKLLKEMKIDDSKKITEHDREKMFYKLNNSKLPFAWRVHILMPQDISAKMLKRQKYNLNEISHDTAISIIQHVLNRGCNLTEVFVDTVGKASVYEEKLQKLFPNIKCVVKEKADSLYPVVSAASICAKVTRDFLIKKWKYEEHIINIDKGFGSGYPGDPVTKNFLKNNFDPIFGFPSIVRFSWSTADTMLENLGEKIEWYDEEESNNSKAMKRKIPFDYSKLQKPLINRSQFYAKNGLDLVSNL
PBANKA_1449000	A0A509AV76	Microgamete surface protein MiGS, putative OS=Plasmodium berghei (strain Anka) OX=5823 GN=PBANKA_1449000 PE=3 SV=1	65.3	0	0	0	0	0	0	0	0	193911	96905	86859	0	0	38443	454987	0	2	0.00257439	1.40495	0.136339	0.837249	7	18	7	18	MSQRYLVIIHCVFLLLNLFKTNCYLVQFHGNSKTNHYQCVGCINEKNETLRSIDNKNNILNSSFLHVQEDDNNEFYSLKLNEKNFRWSIPLALGSEKSIIDLVLTISNSSTAFYCHDENKPSLETEVLGYDLSKSTDLKYVDCTNEECTEILGSNKCLILDEYFKLLKGYALRKKSCKSKFCDYVNKMNFLNMSNPGVDKNASVCPFDKKVDNDKIKGFYFNDSFLISKEKKITYNYFGCITENENLNINENTSGIIGLANDYKADKKYSSILNAFISNSGSKKNIFGLCLIDGGGFISFGGYDKAALEPALPAKEIKGSEEYEDLDTSYRNPLLSIGDDSDNLIWTNYSESTNELYKVKVTKINLNVTDDNSEYDVNKDFILDTYDYFISLPREISTK…
PBANKA_1326800	A0A509AQN9	Replication factor C subunit 3, putative OS=Plasmodium berghei (strain Anka) OX=5823 GN=PBANKA_1326800 PE=3 SV=1	39.3	0	0	21298	0	0	0	66467	27629	44739	0	0	0	0	27796	1975636	0	2	0.60623	0.219936	0.244909	0.821784	11	38	11	44	MIDANPPKIDEQIPWVEKYRPSVLNDIISHEQVISTIRKFVEKGELPHLLLHGPPGTGKTSTILAVCKELYGESRSSFVLELNASDDRGITVVREQIKTFAESKNHYNICERTSLKLIILDEADHMTFPAQNAMRRIMENYAKNVRFCLICNYVNKITPAIQSRCTSFRFSPLKEEYMLNKALDIAKSENVNLTKNGVESLIRVGRGDMRRILNCLQVVSLSHKNMVIDENVILSTLDIPLPTEIKFILEHLTKSTIKESYEIITKLQEDKGYSIKDIMICLYETVLTYDYPDSAICLLLKNFGEIEERCASGTTEQITLSSLISAFIEFRNELFKLKYEPNKA
PBANKA_0938400	A0A509AK77	non-specific serine/threonine protein kinase OS=Plasmodium berghei (strain Anka) OX=5823 GN=PBANKA_0938400 PE=4 SV=1	39.1	0	0	26150	0	0	0	9432	0	45495	61143	32556	0	0	12283	244135	0	2	0.0174351	1.16675	0.197451	0.805747	5	15	5	23	MKGYKYSLSVLSLLYLLTNYAKAMENPMKYTDMKGLEDLSTLSDVQINDIFGLTGDEVKDRLTKLFGVIDKNQDKVLSDDEITAWFEYVKNEVFLKQVQIEMKQIDSDKDGFISLPELNDAFSQNLDPKEVEKHADGLLKRFQIVDKDKDNKLNINEVGLLIDPMKDNDLKELEINEILEHHDTNKDGKISIDEFKETRSDDINMKKDDELALDDFNFFDANRDGFIDREEIVKVYFDPSNDAASVGLNDVKDNIFEGKPITFDLWNEKALKFAVTSLTDYGDVIRYPQDFKLDIGKNVILPSSKNRMGDDSLNPDNDLSDDKDSDDESSDGSDKQNITDEL
PBANKA_1326900	A0A509ARZ4	DNA polymerase alpha subunit B OS=Plasmodium berghei (strain Anka) OX=5823 GN=PBANKA_1326900 PE=3 SV=1	63.6	0	0	0	0	0	0	14285	0	0	0	0	0	0	21957	580752	0	2	0.788165	-0.0854947	0.266528	0.801121	6	8	6	12	MKEIKQIDVKPFLETYYADNSISDELKEIFDYIELNKHKNNFLKLFEDYLSEYNKKLIKNGNLLKDNIIYDYEYVKQYNAGLVEKAGLTCDNKYQWCVKSINSIDENYQFLGLDTNIISENISNKISLFLELFIKYSEKLNLNIEISPILNMNEDESHIFGRIYTDNEINISESNIILEGNINYNNGDKAQLLNLSSMKNLCFFLGQILAIKGKKEINQYSIKYYVSSIYAGLPTHLKVKIDNDILLKHFNCQEIENDIKSEELDNDKILQMYNNDNIHIMVCNGYVYKDNDYSDYFDIFLKIVNEKLPHVVLIFGPFLYIRNFNEAIQKIGDINVIYDNIFKKITKLAKNEALEKTHFYIIPSIYDSINIYPLPQPPFFNENYVNASNNVHFLSNPSY…
PBANKA_1239200	A0A509AP12	Ribosome-interacting GTPase 1, putative OS=Plasmodium berghei (strain Anka) OX=5823 GN=PBANKA_1239200 PE=4 SV=1	40.6	0	0	6576	0	0	0	54662	18426	0	29043	24086	0	0	10025	1247086	0	2	0.457429	0.298252	0.272451	0.787698	11	30	11	39	MSILQKIADIEAEMAKTQKNKATNFHLGLLKAKLSKLKAQLIEGGGKGGGEGEGFDVSKTGDARIGLVGFPSVGKSTLLNKLTGTFSEVASYEFTTLTCVPGIFKYKGAKMQLLDLPGIIEGAKDGKGRGKQVIAVAKSCSLILIVLDALKPLSFKKIIEKELEGFGIRLNKKPPNIIFQKKDKGGINITHTVPLNNLDEDIIKSICHEYRIMNANISIRCEATVDDIIDVIEGNRLYVPCIYVLNKVDQITMEELNLITRLPHNIPISAHLEWNLDGLLEAIWNYLDLVRIYTKPKGHIPDYDSPVILKKDKSKVEHFCKKIHRSLLNQFKYALVWGKSVKHNPQKVGKDHELNDEDVVQLVKK
PBANKA_0929600	A0A509AJZ1	Nucleolar protein 56, putative OS=Plasmodium berghei (strain Anka) OX=5823 GN=PBANKA_0929600 PE=3 SV=1	57.6	0	0	0	0	0	0	16105	0	0	0	0	0	0	7677	2482639	0	2	0.172064	0.393929	0.279101	0.78515	18	37	18	50	MKSLYILFECSAGYFLLKVEEWEQIGNNENLEKKILNADTFHQIVQFCAFIPFETAETALENLLNINEGKATSFLLNFLEQNLPNNKSQYELGVADLNLGKFLSNIGFNIVHNNNILELFRACRLFYLKKIKKYINNADIDIKNFNIGLGHSYSRSKLKLDPRKQDKSIINSIGTIESLDKNINVFSMRVIEWYSWHFPELKKIVTDVCMYCKLVILIQIKENFDFENNKDKINEITQNEEMTENIEKVANLSIGQELAEEDLNNIINFANEVINLSNTRNVLWSYLDKKLDIVSPNLKELLGNTLSARLISHAGSLVNLAKCPSSSIQIFGSEKALFNSLKGNKKTPKFGILYNSSYISKTPTALKGRMSRYLSCKSAMAARIDSFSDYPTNSYGIAF…
PBANKA_1030600	A0A509AN97	p1/s1 nuclease, putative OS=Plasmodium berghei (strain Anka) OX=5823 GN=PBANKA_1030600 PE=3 SV=1	38.8	0	0	12809	0	0	0	0	0	95252	129911	0	0	0	91422	269626	0	2	0.0678877	0.94882	0.20656	0.775418	8	38	8	32	MGFIKYLISCGLFSLLLLKEAVCWSDEGHMLISAIAYEGLNDKEKKILTQIFQNYKEDNNFNNHIYAAVWPDHIKYYEHPVDTTKRMDGMSIMDKWHYINVPYNPTNINLDMYHKEYYKDTDNSLTISRRIFEDLKSMEKKKNYGSYFSYNFQLRYFIHVFGDMHQPLHTTTFFNKNFIKGDFGGTAINVNYNNRTEKLHHLCDCVFHARDKKWPHATVEEVTNDARALMNTYPPEYFGNRLNNGMNEYEYLGYIVEDSYSQAIDHVYYTFPFDSLNKHTVYSLPNAYVINLKKILNEQIALGGYRLTRYLKIMIENIPDDLLQTGTI
PBANKA_1024900	A0A509AJY2	DNA replication licensing factor MCM2 OS=Plasmodium berghei (strain Anka) OX=5823 GN=PBANKA_1024900 PE=3 SV=1	111.3	11456	0	0	32068	0	0	43545	28467	18171	0	19692	0	0	22223	1831451	0	2	0.936531	-0.0288869	0.283714	0.774296	24	46	24	35	MDDKKKVDDELESSKYDIDEEDLLDDEGRLNEEERQAELEGSDLFEEDDGFVFGEEDEKKEIQKLRNLGLDNDEYDEDFIDDEVDYEDNLKARRAAERNIQLQRKQEGRYQKNKFWKALENHLGDDEEEDIFDKVAEKVAKRRENLHLSSDETDIPDLSNLESAKICLSVNPKDVIFDERYQQAADTCFRYFLHRFSLKDSMGVNIEQSPHLEYNETENMNDFNQYYIGKIEKMILNDKHTLIVSAKHLIQFHCENLVQWIEFKPEQILEVLHECLMVEAYRISPKLYKGRICKVVLKDWPYSTQLRNLRCTELNTLIKVTGVCVKRGYVLPKLRVMYLKCNSCDTTLSEVPIYFSDGKKPVLPRRCPHCQSSTFSVDRIKTAYTDYQKITLQESPNSV…
PBANKA_0830200	A0A509AKZ5	High molecular weight rhoptry protein 2 OS=Plasmodium berghei (strain Anka) OX=5823 GN=PBANKA_0830200 PE=4 SV=1	159.9	0	0	25868	0	0	0	110681	0	0	70520	28289	0	0	103323	3551055	0	2	0.598649	0.212518	0.296547	0.746851	51	143	51	44	MVKLSGIILLSLVWLKLNNSYEIRERISNKNNPDDDILKINVEEDKKKICNNILIFLNADDILTENNKYSFMGKCEKLIDDIKNENNSPDITNEFALSLMHMRSKHTITSSINNNKALKNIIISLDKSMSEPEVINRVKHIIRFNKYLAGKLSYKNIGESLVLRVSSHERMRRSKRELVRNILKDFHIYGLYFDLKSENSTLLKNQESESLINIKNEKLCQTYIHLCQKFYEQTSVYYKIKTILNEVIKHTKDNYALEGEYDISKLFSLENSISQVSQHSDHMLTNESLIYDMNKSNYIKYNQLIHEVIPEDGNIEEQVKKGNGRYIVVVKNLKKAIGNSENYDNIMNIIKKYLINVTKNNKEILDMVMELGNEDIEQFMTQLVFFIHYGFLLITEDKH…
PBANKA_1305300	A0A509APF9	FACT complex subunit SSRP1 OS=Plasmodium berghei (strain Anka) OX=5823 GN=PBANKA_1305300 PE=3 SV=1	57.1	0	0	0	0	0	0	134351	0	0	0	0	0	0	38341	3222305	0	2	0.695664	0.166143	0.319346	0.723031	24	106	24	56	MPADNTGSTSSNSPVISIGNIRGLGGCDYGPFRMSNEFLGWKNKKTNSVYQYKCNDISEGEWIKLSYNNNRLHLKFNESKDNLIVFFDGFPDRNLSEITQHFQKYFNIKLGTRKLATKGWNWGEFKLENSNLIFDIDKKYAFNINTNNINQLNVQIKTDIAIELKNDENKQNTNEDVLSEIRFYYPHENDENQNFQDLKNNLLEKVNIGDSKSECIASLSNIPLLVPRGRYEIEMYSKTFKLHGKSYDFTVQYSNINKMLLVPKTNSNQYILIFSLNNKIKQGQTEYPFILIQLSNDDDMDLDINASEEDIQNYKLEKTLTGKAYDVVTRLFTALAKKNAIIPGDYRTAKNEHGITCSYRAASGQLYPLNKYFLFVVKPVILISFDDIVTLSFQRTGNI…
PBANKA_0416000	A0A509AKT5	High molecular weight rhoptry protein 3, putative OS=Plasmodium berghei (strain Anka) OX=5823 GN=PBANKA_0416000 PE=4 SV=1	105	0	0	0	32755	0	0	129673	0	0	0	35968	0	0	105328	3976497	0	2	0.634358	-0.194252	0.304566	0.719003	33	86	33	42	MPTNSFTKLFLASLCTFSVSQVWGKEYFNGVLSQKLSVLLQCNFISYYNAKAGGPNPNAFLDFVEEPEQFHWFVDNYLSVPFKVPQHLSFNNEHDFKPCLKKKWVPEFLKEYEEPDISYLAKTLDNEQRHYYKDTFGDIEPVGKYTIFEVKEFDSYCILPPLVQTNIRDKNNKEYLSFQMDKTDYQIYLEVVGSKLSSMKHLCANMEYSEKKEIVKAITEGNNENSFKLICPSYYLKLHYNKECKSKDNILSCIDDHIKNSCLNSTKDDDNPNICYYLINLFNSLRDYQIEYFHKFLTTNELNLVKPRDPWVKPLFKVYSRKDLGNPKKNILPDVFKELEPKNKIYFSFSAGISSDSNYVDNTQTNFKLSKKKSNIFVDAFQNVFSIFKRKSPSISYVS…
PBANKA_0938300	A0A509AM83	DnaJ homolog subfamily C member 16 OS=Plasmodium berghei (strain Anka) OX=5823 GN=PBANKA_0938300 PE=4 SV=1	63.4	0	0	0	0	0	0	23086	0	0	0	0	0	0	30522	858087	0	2	0.753938	0.101594	0.332064	0.717327	9	13	9	20	MNSTNEKKRKRITNLNSIIWLLLSFFLTCAEGVDYYKRLGLKRNATKDDISKAYRKLAKEYHPDIAPDKEKDFIEIANAYETLSDPEKRKMYDMYGENYAEASQGFGGGPGGPGGGGPGGFGNGFPFDQDVVNEIFRQFSGGGRGGNSGGNFHFKFSSGGNKGYNSGPRYGGSHPFEEEYYEDIYKNEVLKINSKNSNSIIDDINYSLLINFYSSSSSECISFKKIYLKLSKKYDGYINFAVINCDEEKALCKKYKVRSLPHMILIKKNKTYETLYGSKTEDNVKNFINNNIPYSFTEIKNKKNLDKFLTKSADIPKVLFFISHKDNIIMLKVLSMEFEKRLNIGIVYDTNYTIMKIFKKRNIKTPSILLIEDIDTLEGDLTHLKTVDFNILSLKLSHI…
PBANKA_0522800	A0A509AGL9	40S ribosomal protein S19, putative OS=Plasmodium berghei (strain Anka) OX=5823 GN=PBANKA_0522800 PE=3 SV=1	20	0	9382	18760	0	0	0	229900	0	31492	70683	34430	0	11550	0	7395036	0	2	0.238107	0.478496	0.333845	0.710472	12	46	12	66	MAEEFTDDIGVFSKKLLEPVPFVRTNNCIKDVDAELFISAYAKYLKLHNKITFPKWCNFVKTGKGRKLAPLDEDWYFIKASSILRRLYIHPDIGVGFLRRQFSYKQRRGVAPNHTSLASGKILRSILQQLENIGYVEQNPKKKGRRLTIKGENAINNFARYINKKVYKLEKQ
PBANKA_1117700	A0A509AKK4	L-lactate dehydrogenase OS=Plasmodium berghei (strain Anka) OX=5823 GN=PBANKA_1117700 PE=3 SV=1	34.3	0	0	34956	129162	0	21235	282491	0	152319	212462	115636	0	0	452755	3512581	0	2	0.207394	0.635451	0.310844	0.704822	13	95	13	57	MPKISLIGSGQIGAIVGQLCLSENIGDIVLYDVVNGIPQGKSLDLKHYSTIIGVNRKIIGTNNIKDITDSDVIVITAGVQRKEGMSREDLIGINGKIIKSVAESVKQYAPNAFVICVTNPLDVMVNVFHKYSNLPYEKICGMAGILDTSRFRYLLSEKLNVSPENINAIILGGHGDLMMPLPRYCSISGIPLLDYIKNHDMSEKDISDIIEKTRNMGGEIIKLAKSSAAFAPAASIIKMIKSYLHDQNQLFTCAVYLSGLYNCKDLYAGSTAIINKTGAHPIEFILTEEEQACYQKSINNIRENTQKALNVID
PBANKA_1018400	A0A509AJG8	Protein arginine N-methyltransferase 1, putative OS=Plasmodium berghei (strain Anka) OX=5823 GN=PBANKA_1018400 PE=4 SV=1	46.2	0	0	0	0	0	10880	33162	28163	0	21481	16568	0	0	14627	3074947	0	2	0.524333	0.154479	0.353785	0.693263	11	34	11	36	MSKKYIHTESKYEEKGKHLNDKNGNQNFSEDTLKQFYNSWDKLYKEEIRNKERKNFIKFDDDGTEKDMENGNKEYFNSYAYIHIHEDMIKDEIRTRSYYDAIRKNEHLIKDKIVLDVGCGTGILSFFAAKHGAKHVYSIEKSNIIYTALNIRDENNLTDKITFIKGLAENITLPVEKVDIIISEWMGYCLLYENMLDTVLFCRDKWLKPDGIIFPDKAYMYIAGIEDSLYREEKFDYWKHCYGFNFTPVVPILKEEVVIDYVDKNYVVTNSSCILKLDLNTCTKEDLSFVSPFSITMTRRDYIHALVIWFDISFSACHTDVSFTTGPYGPNTHWKQIVLYTNHIITGEKNETLKGMFALKKNEQNNRYIDMKLYYNFSGVHSKAESTQFFNIS
PBANKA_0619200	A0A509AHA6	Secreted ookinete protein, putative OS=Plasmodium berghei (strain Anka) OX=5823 GN=PBANKA_0619200 PE=4 SV=1	54.7	0	28374	32133	75152	0	0	152386	0	325863	291715	275674	48736	0	191841	3088357	0	2	0.0124728	1.19056	0.313037	0.663595	19	114	19	46	MNKLLMLSLFLYGVAAVRPFKGNYDDAVKTINDDLERKSKKNGTMNDKPFNLRENINYERKNNYELYTDIDGELKQQKFNVNEPRQILKKNIDEFRYLINDLEILFGVYKFNPRDKEKVLKETLKPESLCFTIMGLISNHLNELKVNNAPIYGLYIKGERNSNYEVNSTLGIYAILSNITISIGNFTFPEMKNAPYQLPYLVGHYDSRTGFKNKDIAYLCPLPKFLIDVIRTTQFGLRVFYNGADIDVKELFPITLSYALENKSLLPIYKEDSNYKAEKTKLLNILSKEAEDIPFRMIKDKSISGKGIKNPEERLLVSKSFFNSREQIKKFISSSGKTPMDSNSIALYFLALSQNAFSKQKNFAMSRITKINVTNIQKSKNGYLSQYSIQLGLENNSSI…
PBANKA_1113400	A0A509ANV7	Secreted ookinete protein OS=Plasmodium berghei (strain Anka) OX=5823 GN=PBANKA_1113400 PE=4 SV=1	85.1	0	33774	20766	28842	0	0	170812	22829	135394	174878	144290	0	0	102324	4643690	0	2	0.14905	0.68342	0.339119	0.647062	36	132	36	55	MFRLSIFGTLFLWSIFLIIKTNCFYFKVDSELISKDSNIRKCHKEHYLNFQGQIVQVCNDKIITNTSMSNNIYISVYNKENKWEDKLKLFNNHTQKKIEYFYSFISNDSLVIIYCFSKSLISSPYECHSATSTDLITFTTQKIGIDFKSIDPLSLQDYSINELDIFEKKYILICGLDIQKKQYGEYNKFILCNASSNGGINWTEKFTFFVTGVDPKLKYTKLVPKINGNEIGFLYYSEKEHLNRYLKCKYRDGYDYECYLVGLARLESYMWDISKIRGYYISIISNNKQPPHYIYYMHTNIYTIPLEAPTSMDVDYKKGNLFPLDSYRLIYNYVAGNNTYTYILKHTGAVKYCALLYIKREHMNPGFVKNGNKYICTILYDDLIVDGDDRYFTLGVYNG…
PBANKA_0824800	A0A509AJ82	Polyadenylate-binding protein 2, putative OS=Plasmodium berghei (strain Anka) OX=5823 GN=PBANKA_0824800 PE=4 SV=1	22.9	0	0	0	0	0	0	302344	0	10265	91662	106349	3611	0	12001	7437675	0	2	0.438017	0.360179	0.366237	0.631753	7	33	7	49	MDQINQEPGKNEEENFRAHDDDINNIDKEFSDLQKLKMMNDGAEMQMNQTGAPDSHEMEQEEINNRSIFVGNVDYSTQPEELQSLFSECGIINRVTILVNKNTGHSKGYAYIEFADPSSVRTALSLSESFFKKRQIKVCSKRRNIPGFNRPRMGAFRGRVMKSPLSSRGRFGLRQPSFRPFYRGRGTYKKVVTNPYERA
PBANKA_1034400	A0A509AJX6	Plasmepsin IV OS=Plasmodium berghei (strain Anka) OX=5823 GN=PBANKA_1034400 PE=3 SV=1	50.5	0	0	63816	64358	11470	15722	119997	0	347901	345688	319753	32473	0	308839	3444951	0	2	0.0118733	1.10481	0.352919	0.611835	11	132	11	31	MEYSEKESNYSNGLMRNGSAFGHLKFDNIKSFKIQKKFQALYFIIFICIIGSIFAYMVGTNYYSTKTIDIDKIIANSEYLTIRAKIERPRDKLFKKVMNKNVSNYIKESFKLLKSGLLKKEHLTKYEDSIELDQSLGLSFIGTAELGNNKQSFSFILDTGSANLWVPSKECKSGGCAYKHRYDSSASNTYEKDGTPVSILYGSGGIKGFFSNDMFTIGHHTIPYKFIEVTETDDLEPIYTASPFDGILGLGWKSLAVGNVEPVIVEMKKTGQIENAVFSFYLPEADDSVGYFTIGGIEESFYTGDVTYEKLTNESYWQINLDVDFGIVALNNANAIVDSGTSAITAPSDFLNKFLNSIMSIPVPFIPLRIVLCHDTNLPTLKFRSKSTEYTIEPKHYLI…
PBANKA_1145800	A0A509ALB6	Membrane associated histidine-rich protein 1a OS=Plasmodium berghei (strain Anka) OX=5823 GN=PBANKA_1145800 PE=4 SV=1	20.4	12985	0	21096	0	0	0	28076	0	110893	0	35519	0	0	48745	541693	0	2	0.0616622	0.771924	0.363846	0.604919	3	12	3	25	MAYTEKEGKEESKIMHPQDEDPAELSKYIANESSATFSYLKKAENYMKKFYESYLVPNSSNDTSRENSDDESEEDRKKNEGNGKKEKRKRKKKPQTLCSKVKYNITKKLTLPNLVIIGFIACFMMFTYSRIAQHRNQIGYAAGFLGDVSHERVARPPGCTCGGHKAHGTTRGTTTHRTN
PBANKA_0707400	A0A509AI09	RNA-binding protein, putative OS=Plasmodium berghei (strain Anka) OX=5823 GN=PBANKA_0707400 PE=4 SV=1	32.9	0	9152	0	27880	0	0	197267	21938	0	66394	31266	0	0	31923	5696232	0	2	0.598867	0.218763	0.411372	0.60332	13	72	12	53	MSIANSSKIFIGSIPKDVTEDELKTEVAKYGNVVQVYYVPATAQSPRGWAFITYEQRSEAYKAIESLDYKCIFPNSQRPLDVRFASYKHNNTNDMQVNSINKNIWQKHVTSDGHPYYYNSVTGHSQWEKPKEITPVNYPVKNTVASFGPPGANVFVFHLPSHWTDMELYQHFQHFGYVVSARIQRDANGRNKGYGFVSFNNPESALNAIKGMHGFYVSGKHLKVQLKKGEEHYIQLNSPAQPQLTPAQPYTVQQPIMGNHPQPYMTHLMYGGMDSPNQIRYNNYSLSR
PBANKA_0811300	A0A509AKR9	Exportin-7, putative OS=Plasmodium berghei (strain Anka) OX=5823 GN=PBANKA_0811300 PE=3 SV=1	134.6	0	0	0	71395	0	0	111310	62131	26142	19065	45390	0	0	17828	3793863	0	2	0.636341	0.222863	0.419942	0.603035	31	75	31	37	MSEAELQQLQVLCEAMYCGNKEEQNQAHTILLPLVSNVGNVSKLKNILGSTTHVHTLIFTTSGLLQLITNEWNKIENNEKEELKEFVISYLYNKGVELLNLSSNILGNFVRLYVRIVKLSWLENTNYALITKQVEYFLNSVTSHWIIGLYIYAALIEDMHPQCGVNSAKSRRCAISFRDYVLKDIFKVGIETLEEFVKGSIRIELRVEENRLLMKVLELIYNSLSFDFMGTMINDESSDENISLMIPQSWDIFNEKNIPKLFFDMYEICMSEVDDIRNCCGKYCIRSLILLGSLRKTFFSNEKQKIRYMNEFLGGINKIIEKKIGLHDEDCFHELCRLIGKIDTSIRLQELSTYSNFLSWCNNIYLFTMDGMKNWKYLCNSKHYLLGIWSNMLNIIPPK…
PBANKA_1211300	A0A509AQ42	Autophagy-related protein 18, putative OS=Plasmodium berghei (strain Anka) OX=5823 GN=PBANKA_1211300 PE=4 SV=1	43.5	0	0	0	29233	0	0	55036	20966	0	10624	0	0	0	18078	755289	0	2	0.483781	-0.280705	0.414973	0.599487	8	18	8	27	MVSLRLDNNRYIAFNQDYGCLCMANEKGFKIYNTNPFTQTYSRDLTDRNKNGLYIAEMLYRCNILAITGNKNDRKGKWAKNVLIIWDDRQMREIAKLTFSSNIIGVRLLREIIVVILEYKLCIYRLKDIILLETLNTTKNPSGLCCLSNIDKNIIIAYLSPIKGRVNIHIFEKNASENVHEELPYINFKTDLSIYAHDNPIGCINLSNDGKLLVTASTKGTIIRLFNTFDGSLLNEFRRGTKNAKILSLNISNDNNWLCLTSNRNTVHVFSIYKRNRPPRKVDIISKGKNISSHVMLNYEKESKNKKSSIKCLLPCHPYLNSDWSFSSYKIPGKKISSICAFVSDQNCIIVICSNGLIYKLRFNEHVGGEMLKISSHSFD
PBANKA_1400600	A0A509APX9	Cytoadherence linked asexual protein, putative OS=Plasmodium berghei (strain Anka) OX=5823 GN=PBANKA_1400600 PE=4 SV=1	152.1	0	0	0	0	0	0	26210	0	0	0	12127	0	0	22716	4185948	0	2	0.798411	0.0650047	0.428147	0.595946	41	87	41	38	MVSIRNIMKIALVALGVIIGNTFCHSTEDNVKELKYMIDNKGLYDDLMKLQRELIVSLESDEIKLPKATSESREYFDISKFKLIKCNDVDEIGDSVEYVVPEEHTGLEDIIKYENIAKCEGIKKYRGENSNLIKRKMILIRGLKIAKLMVLSMDLYRETSDFKKALKGVNDALHGEEGEVISKNGGLNKEGGSDKYLDMLMHDIDKKTLFEMDGGFFTTDGSFEFGNNLDLIARQHRIRLFQLIGPHFPALGHFVTLSLALKNYENFFEKGKGHFISWQKLLSFNMSDRFKALDLMCNVEGKYDIQKKRRMTYLEQNRKGSFDECNILEFLIHYFNKYQLSLISRTYDDEFQSYYLLEHKDMKEEFFRFMCNGSKNCNIYNSDNFLSNENDDNKVVLKK…
PBANKA_1028300	A0A509AL46	Serine/threonine-protein phosphatase OS=Plasmodium berghei (strain Anka) OX=5823 GN=PBANKA_1028300 PE=3 SV=1	34.9	0	0	0	52205	0	0	47499	13703	12230	0	0	0	0	13004	1912977	0	2	0.72225	-0.128705	0.430453	0.577874	12	37	7	54	MALEIDIDNVISKLIEVRGTRPGKNVNLTENEIKILCLSSREIFLNQPILLELEAPIKICGDIHGQFYDLLRLFEYGGFPPDANYLFLGDYVDRGKQSLETICLLLAYKIKYPENFFLLRGNHECASINRIYGFYDECKRRYSVKLWKTFIDCFNCLPVAAIIDEKIFCMHGGLSPELNNMEQIRKITRPTDVPDNGLLCDLLWSDPEKEINGWGENDRGVSFTFGQDVVHNFLRKHELDLICRAHQVVEDGYEFFAKRQLVTLFSAPNYCGEFDNAGAMMSVDETLMCSFQILKPVEKKKITT
PBANKA_1420600	A0A509AQF4	Histone H2B OS=Plasmodium berghei (strain Anka) OX=5823 GN=PBANKA_1420600 PE=3 SV=1	13.7	0	48461	38174	0	0	0	265324	0	0	39150	164827	0	0	19006	6023022	0	2	0.8394	0.101293	0.419799	0.561116	7	52	5	49	MSGKGPAQKSQAAKKTAGKTLGPRHKRKRRTESFSLYIFKVLKQVHPETGVTKKSMNIMNSFINDIFDRLVTEATRLIRYNKKRTLSSREIQTAVRLLLPGELSKHAVSEGTKAVTKYTTSGA
PBANKA_1030100	Q4YU79	Actin-2 OS=Plasmodium berghei (strain Anka) OX=5823 GN=ACT2 PE=1 SV=1	42.6	0	0	34348	104458	0	0	109090	39634	148510	161604	110783	26088	0	149688	2499482	0	2	0.0613266	0.850256	0.429725	0.556362	14	80	12	51	MPEESIALVVDNGSGMVKSGLAGDDAPKCVFPSIIGIPKMPNIMVGMEQKECYVGDEAQNKRGILTLKYPIEHGIVTNWDDMEKIWRHTFFNELRVSPEEHPVLLTEAPLNPKTNREKMTQIMFESFDVPAMYVSIQAILSLYASGRTTGIVLDSGDGVTHTVPIYEGYVLPHAINRTDMAGRDLTYYMMKLFTERGYTFTTTAEREIVRDIKEKLCYIALDYDEELKKSEERTEEVEEMYELPDGNLITVGSERFRCPEALFNPSLIGRECPGLHITAYQSIMKCDIDIRKELYNNIVLSGGTTMYNYIGERLTNEMTSLAPPSMKIKVIAPPERKYSVWIGGSILSSLSTFQKMWITKEEYDESGPSIVHRKCF
PBANKA_1120200	A0A509AM71	Pyridoxine biosynthesis protein PDX1, putative OS=Plasmodium berghei (strain Anka) OX=5823 GN=PBANKA_1120200 PE=3 SV=1	32.7	0	0	17141	14617	0	10962	78525	24658	18115	31149	15041	0	0	12824	1304936	0	2	0.743059	0.138545	0.454918	0.549815	8	20	8	36	MRDYADNDSILLKHGWCEMLKGGVIMDVKNVEQAKIAEKAGAIGVMILENIPSELRNTDGVARSVDPLKIEEIRKCISINVLAKVRIGHFVEAQILEELKVDMLDESEVLTMADEYNHINKHKFKTPFVCGCTNLGEALRRISEGASMIRTKGEAGTGNIIEAIKHIRTVNNEIKYLCSLDESEVYNFAKKLRAPIDLILLTRKLKRLPVVNFAAGGIATPADAAMCMQLGMDGVFVGSGIFESENPQKMASSIVMAVSNFNNPKILLNVSLGLGKAMHGNTKVSNKWKNKSEEDNS
PBANKA_1423500	A0A509AZY7	60S ribosomal protein L13-2, putative OS=Plasmodium berghei (strain Anka) OX=5823 GN=PBANKA_1423500 PE=3 SV=1	25.4	0	0	0	0	0	0	430181	33769	35738	75211	210065	0	0	27677	9757401	0	2	0.427347	0.372473	0.435454	0.544955	13	84	13	58	MVSHNNVLPNVHLHKWWQRYVRVDFNKNIKRKKRRLLREKKRKQNGSTPIEKLHPLVHCPTQRYNFKIRLGKGFSLDEIKAVNLTPSAARSIGIVVDKRRKNRCEESLKRNAERLQKYLNSLVMIPLKKDKPKNGIGGIPADATKEVIEQHKETKQLRSIFKKGSNVKPFYESIDVSKIDQSYLAYKTLRKAKSEERRKNRQQQRKDIKRKSKDN
PBANKA_0715200	A0A509AMU8	Eukaryotic translation initiation factor 3 subunit G OS=Plasmodium berghei (strain Anka) OX=5823 GN=PBANKA_0715200 PE=3 SV=1	31.5	0	24060	0	0	0	0	216980	0	0	57329	63418	0	0	26256	4469100	0	2	0.563917	0.2471	0.482589	0.511913	8	25	8	49	MIQTEKKNWVDIDVDDDESLNDNENKKKWEDIDADDDLESNKKLSYFTNYENGVKVVTKYSENLKKQTVKVTKKIKEVIIKKRLNKEIENRLKLKNFNVDAFSSVIVEPTDVVNIEPPKNNLLDFLKDTEYDYLFAEQTDKTAKDLKNRFKMFKDEEAEEAKPDDANKVGAKRDMMYYRSHDTQNKECTIRVTNLSEDVNESELSNLFGRVGQISRMFLAKHKETQNSKGFAFITYSKREEAKRAIEKLNRHGFENLLLSVEWAKPSNR
PBANKA_1135100	A0A509ALB0	40S ribosomal protein S15, putative OS=Plasmodium berghei (strain Anka) OX=5823 GN=PBANKA_1135100 PE=3 SV=1	17.2	0	0	68846	0	0	0	289528	55581	44419	233863	204252	0	0	35930	6544718	0	2	0.200463	0.647146	0.461502	0.51086	9	46	9	46	MGRMYGKGKGISSSTIPYKRKQPSWLKQKPSEIEDAIIKLAKKGQTPSQIGATLRDNYGIPQVKAVTGNKILRILRAHGVATTIPEDLYFLIKKAVSMRKHLEKNKKDKDCKFRLILTESKIHRISRYYKRKRLLPSNWKYQSSTASALIA
PBANKA_0940900	A0A509AM91	RuvB-like helicase OS=Plasmodium berghei (strain Anka) OX=5823 GN=PBANKA_0940900 PE=3 SV=1	53.4	0	0	16671	35972	0	0	91463	65128	0	35576	12107	0	0	26894	1970763	0	2	0.598813	-0.222847	0.485592	0.507888	17	41	17	47	MEINLTNISISNDGKKERINIHSHIKGLGVNTNIYMHEDEVNLSDEKYSMFFDNTCGLVGQFKAREAALFLVDLIKNKKLAGKCILLAGPSGSGKSALAIGISREINKKMPFVFLSGSEVYSNEIKKTEVILEAFRKSIHIKIKEEKLVYEGEVVDMIVEENECLYSQNKAKQINAIIITLKTVKGTKSLRLAPKIHEQIVREKIKIGDVIYIEVNTGHVKRLGRCNTYSKEYDIEFDEYVSLPKGEVHKKKEVVQQISLHDIDLANANPTVGEDLASVLNSYLRPKKTEITEKLRVEINKTVNKFLEMGMAEIIPGVLFIDEAHMLDIECFSYLNRAIESPLAPIVIMATNRGICTVKGTDNIEPHGIPVDLLDRIIIIKTFPYTLKEIVQILALRAH…
PBANKA_0416600	A0A509ADK8	Replication protein A1, small OS=Plasmodium berghei (strain Anka) OX=5823 GN=PBANKA_0416600 PE=4 SV=1	56.5	41938	56682	65605	255068	36846	57093	190080	155049	100765	119923	79854	41862	0	297737	3389758	78830	3	0.90182	-0.0401965	0.500213	0.503331	22	112	22	52	MSENDLLFRISQITTYVSKWIIKAKVVNKSKLSTFKNNNSFFSIDITDVHGDSISCKFWGSSADKWFNNIELKKVYIFSKGRVSIANPKYNTVKHKYELTFNEDSEIHEVKDDGEIKIQKNISLVNLRDIKIATKETPFTADLIGIVKHICPPNNLKTKQGNDIIKQNIIIVDDTKHSFEISFWDSNVNLIEKDLKENEIYIFTNISIRNWNDMKNGTFGVTSSIEKVENLNDELKEKCLGISEWYNNNGKYEQFTNMKNILSNDVIQTPDKHYALSDVNDVLAKISGTYTLVGRIKRIYWKSKENEHRFYYPACTKCKKKLLSSGQDSAQGVDYDNSNFNNEENCVYSCMNCDENNVKPFYNYTFNFLFMDFSGSITLRAFSDEGFNLLGKKAEELKG…
PBANKA_0906400	A0A509ALC8	60S ribosomal protein L35ae, putative OS=Plasmodium berghei (strain Anka) OX=5823 GN=PBANKA_0906400 PE=3 SV=1	16.5	0	40823	53641	0	0	27459	149007	0	34171	64217	102086	17432	0	36734	3509282	0	2	0.317604	0.40231	0.497724	0.499764	4	29	4	36	MENEQIIQNNDTTTSVKKGVNKSIKKVLRKNKKGNKKMKAPRLYEKGVILGYKRSQRNQDPNFTLLSIRNVNTRKHAQLYVGKRVAYVYRTNKHHDGVKIKCIWGKVCRTHGNSGVVRARFATHIPPQAFGNRVRILLYPSNI
PBANKA_1117000	A0A509AM25	Histone H2A OS=Plasmodium berghei (strain Anka) OX=5823 GN=PBANKA_1117000 PE=3 SV=1	14.2	0	0	69609	47989	0	0	344886	0	18430	287041	19979	0	0	32078	11618072	0	2	0.818154	0.109479	0.48425	0.493175	6	59	5	56	MSAKGKTGRKKAVKGTSNSAKAGLQFPVGRIGRYLKKGKYAKRVGAGAPVYLAAVLEYLCAEILELAGNAARDNKKSRITPRHIQLAVRNDEELNKFLAGVTFASGGVLPNIHNVLLPKKSQLKSGATANQDY
PBANKA_1318100	A0A509ANA6	Aminopeptidase P, putative OS=Plasmodium berghei (strain Anka) OX=5823 GN=PBANKA_1318100 PE=3 SV=1	89.8	0	0	45773	120605	0	0	51973	55164	59807	97853	117773	39686	0	60804	641423	0	2	0.0926678	0.923073	0.49259	0.48416	14	58	14	31	MRINSLIYANLLLTAIHANFFSKGNKANYVSAYINSFHHINNNNNNDNKINIEDNNKINDTNTGKRQDQLNNFFTRRFYTFHNKNQYLREEKRNSKEVNLTNNNTNSYNMESSNEQNNQMMGGDSYKERLQNLKKYMAEHNIDVYIIINSDAHNSEIINDQDKKIYYLTNYSGADGILILTKDAQIIYVNALYELQANKELDTKFFTLKVGRITNRDEIFQTIADLKFNTIAFDGKNTSVSFYEKLKDKIKIQFPDKKIQEKFIYKNSINQVVKDNNINLYVLESPLVTVPNSDVNKKPIFIYSREFGGSCAAQKIQESFDFFIENPDVDSLLLSELDEIAYLLNLRGYDYKYSPLFYSYVYLKYNRDKGIIDDIILFTKVENVQKNVLAHLERIHVKL…
PBANKA_1305100	A0A509ART6	60S ribosomal protein L1, putative OS=Plasmodium berghei (strain Anka) OX=5823 GN=PBANKA_1305100 PE=3 SV=1	24.8	0	0	32034	27366	0	13797	301267	0	0	91298	117450	0	7582	0	14427512	0	2	0.529524	0.267583	0.503123	0.480953	21	95	21	64	MSKLNQDLLKKAINDVFEGTKQKKRKFVETIELQIGLKDYDTQRDKRFSGTVKLSNEVRKKLKVCILGDAVHSEEAQKLKLDYMDIEAMKKLNKDKTLVKKLAKKYDAFLASQVILPQIPKLLGPGLNKAGKFPSLITHNDKINDKILELRSSIKFQLKKVLCMGVPVGHANLKEEELRSNIVHAINFLVSLLKKNWQNIRTLHIKSTMGKPQRIYG
PBANKA_1232100	A0A509AMJ5	Serine/arginine-rich splicing factor 1, putative OS=Plasmodium berghei (strain Anka) OX=5823 GN=PBANKA_1232100 PE=4 SV=1	36.3	0	23433	0	99216	0	0	378832	0	0	133370	169928	0	0	26968	9233574	0	2	0.475471	0.354431	0.496433	0.480747	16	65	16	38	MVIRDSVSRIYVGNLPSHVTSRDVENEFRKFGTILKCDVKKTVSGAAFAFIEFEDARDAADAIKEKDGCDFGGNKLRVEVPFNARDNGKYNSRGRGMMGRGSKSRRGRYVVEVSGLPLSGSWQDLKDHLREAGECGHADVFKNGTGEVSFFHKEDMLEAIEKFNGSTFRSHEGEKAKITIRQKKTSWRRDDGYGRYNDRNRSYSSRSYSRSDKRSYSRSRSYSSRSYSRSRSRSRSRSRSRSRSRSRSRTSSSRSRSMDRRRDAYEKKRSYSRSSSYQDRRRNNRSISKSGSRSISRSGSRSASRSSSWSNKRRH
PBANKA_0941800	A0A509AKM3	Histone H2B OS=Plasmodium berghei (strain Anka) OX=5823 GN=PBANKA_0941800 PE=3 SV=1	13.2	0	118324	240330	231751	0	75123	587089	0	151236	450048	446030	107387	0	176055	10688143	29241	3	0.171581	0.705339	0.518448	0.468887	7	81	6	47	MVSKKPAKEKKATNGATDGKKKRKKSRYDSYGLYIFKVLKQVHPDTGISRKSMNIMNSFLVDTFEKIATEASRLCKYTKRDTLSSREIQTAIRLVLPGELAKHAVSEGTKAVTKFTSK
PBANKA_1355100	A0A509APL1	40S ribosomal protein S6, putative OS=Plasmodium berghei (strain Anka) OX=5823 GN=PBANKA_1355100 PE=3 SV=1	35.4	0	0	45242	45448	0	0	513364	173842	60910	234901	181280	19497	0	60122	9209078	0	2	0.270078	0.550982	0.521965	0.464938	15	78	15	38	MKLNISNPLNNVQKSIEIDDEKKLLPFMERRIGNVVPGDSIGEEFSGYIFRITGGNDKQGFPMMQGVLTNHRVRLLFKKGMKCYRPRKKGERKRKSVRGCIVGQDLSALNLALVKKGDNEIEGLTDKAVGKKLGPKRASKIRKLFNLDKTDDVRKYVIGRAITKNGKTRFIKPKIQRLVTEKRLLRKRSLIAAKEKRAAEKKQAMKEYKQLLRKYKSELITKKDNDTGKKIKVKKNISKDAKKNNKAKDSKDDKLKTKKNVDKKSENSKKFPNKKINEKQPKADNKNAKVDKKAAAKTINEQNKPGKKKK
PBANKA_0702800	A0A509AJZ7	Protein disulfide-isomerase OS=Plasmodium berghei (strain Anka) OX=5823 GN=PBANKA_0702800 PE=3 SV=1	55.4	0	14105	76378	112174	21700	13214	0	29698	401180	205711	194495	13142	0	92365	1622918	0	2	0.0456757	0.978806	0.479002	0.451033	18	116	18	51	MNTKYISFFLFIIPFIFKNYVRSHEDLFNEHITSIHDGELNNFITKNDIVLVMFYAPWCGHCKRLIPEYNEAAIMLSEKKSEIKLASVDATVERGLSQEYGITGYPTMILFNKKNRINYGGGRTAQTIVDWILQMTGPVSTEITGNIEDVLKESNINVAFYMEYISEDNELFKKFNEVGDKNREIAKYFIKKNDKHNKIYCYRKDEKTVEYDEKTPLNDFVAIESFPLFGEINTENYRFYAESPKELVWICATIEQYNEIKEEVRLAAAELRNKTHFVLLNIPEYADHAKASLGINEFPGLAYQSSEGRYLLANPQQSLKNHKDIISFFKDVEAGKIEKSLKSEPIPEEDKNAAVKVVVGNSFTDVVLNSGKDVLIEIYAPWCGHCKKLEPIYEELGRK…
PBANKA_1023400	A0A509AJM5	Glutathione reductase, putative OS=Plasmodium berghei (strain Anka) OX=5823 GN=PBANKA_1023400 PE=3 SV=1	56.5	0	11444	20428	42593	0	0	31363	0	12756	19950	0	0	0	11167	957633	0	2	0.963759	0.0169505	0.549238	0.449961	10	23	10	29	MVYDLIVIGGGSGGMAAARRAARNKAKVALVEKSYLGGTCVNVGCVPKKIMFNAASIHDILQNSRHYGFDTRFTFNLPQLVERRDKYIRRLNDIYRNNLKNDNVEVYEGTASLLNERKVLIKSKNKSENDENNNEIIEGKNILIAVGNTPIFPTVKGVEHTISSDEFFDIKEAKRIGIIGSGYIAVELINVIKRLGIESYIFARGKRLLRKFDESIVNELENDMKKNNINIITMANVEEIEKVHEKNLTIYLNDGRKFEHLDYVIYCVGRSPNTKNLNLEKLNITTKNDYIVVDDNQRTNLKNIFAVGDCCMVKKGKDMEDLNLLKLYDEKIYINNKKNDKEDSFYNVQLTPVAINAGRLLADRIFLNKTRKTNYSLIPTVIFSHPPIGTIGLSEEEAI…
PBANKA_1206100	A0A509AN37	Eukaryotic translation initiation factor 3 subunit D OS=Plasmodium berghei (strain Anka) OX=5823 GN=PBANKA_1206100 PE=3 SV=1	62.2	0	0	0	12935	0	10504	205228	135109	12880	23255	59864	0	0	12860	3943742	0	2	0.896358	0.0609667	0.556874	0.43658	31	101	31	58	MSTFKLFGVVNNRTWGPDIKNEELVNSCMEDIKKYQFEPSMKFEKIGKICDFTTTSYQKNIKDINKNSGDGDNAFEEELQFQTVDLRTGQKPKGTLFNKKKIINKQTTQAFTQKQQEEDNLYSSRIKTAEQKKQKMLQQAKTARLNARHRIFTEWSNEPTPSWTVDCEIMFNELPKKLIKIDHLKIEDIFFRGKVLYYDKRFENINVKNPPFLAHLNKDANVLVCKTSDDQTLLEILDNEEKKAKENNSNTLIIVSTDQILSCLMSCIHSKYSWHLIIKKKGNRIIIDKDDDSIIDLLTVNENSLDAPTQDSENKINSLQALGLEAVKINERFKNHVQLNNQIAEQYDNTSFNSKHCNNNSNILYRYRKINLPPLIHGSSKTSCTIITRGEIHSKIKGS…
PBANKA_1437300	A0A509B0M9	Endoplasmin, putative OS=Plasmodium berghei (strain Anka) OX=5823 GN=PBANKA_1437300 PE=3 SV=1	93.2	0	0	27507	100497	0	0	0	0	238316	184282	216272	0	0	77034	913796	0	2	0.0423643	1.02876	0.480389	0.431375	23	82	23	32	MKIKTKYTYAFFVFLIVLNLLSKNNNVLCHDDQSKVDGENGSGPKGYVKRDVDMISEIDENEKPTSGIENHQYQSEVTRLLDIIINSLYTQKDVFMRELISNAADALEKIRFLSLSDESILKDEKKLEIRISANKDKNILSITDTGVGMTKDDLINNLGTIAKSGTSNFLETISKSGGDMSLIGQFGVGFYSAFLVADKVIVYTKNNNDEQYIWESTADAKFSIYKDPRGATLKRGTRISLHLKEDATNLLNDKKLTDLIAKYSQFIQFPIYLLYENVYTEEVLADIAKEMENDPNYDSVKVEESDDPNKKTRTVEKRVKQWKLMNEQKPIWLRPPKELSEDDYKNFYSVLTGYNDAPLYQIHFFAEGEIEFKCLIYIPARAPSINEQMFSKQNSIKLY…
PBANKA_0615200	P62345	Calcium-dependent protein kinase 4 OS=Plasmodium berghei (strain Anka) OX=5823 GN=CDPK4 PE=1 SV=2	60.6	13512	28110	57289	153926	0	0	185155	89230	79319	136149	87637	31314	0	113959	4333613	0	2	0.327614	0.438337	0.564427	0.429529	21	94	21	47	MGQEMSTQSDMQNENQKGNKRNLKGSQGKNGLKERSTSISKEIVKNSFNNSKLRPGMFIQNSNVVFNEQYKGIKILGKGSFGEVILSKDKHTGHEYAIKVISKKHVKRKTDKQSLLREVELLKMLDHINIMKLYEFFEDNNYYYLVSDVYSGGELFDEIISRKRFYEVDAARIIKQVLSGITYMHKNNVVHRDLKPENILLETKNKEDMIIKIIDFGLSTHFEYSKKMKDKIGTAYYIAPDVLHGTYDEKCDIWSCGVILYILLSGCPPFNGSNEYDILKKVETGKYTFDLPQFKKISDKAKDLIKKMLMYTSAVRISARDALEHEWIRLMTSKDNVNIDIPSLELSITNIKQFQSTQKLAQAALLYMGSKLTTIDETKELTKIFKKMDKNGDGQLDRN…
PBANKA_1329300	A0A509AQ19	40S ribosomal protein S3, putative OS=Plasmodium berghei (strain Anka) OX=5823 GN=PBANKA_1329300 PE=3 SV=1	24.7	0	109017	307283	194439	0	30798	734143	188388	177844	477161	400293	46400	27918	167448	20194515	0	3	0.341387	0.488767	0.557887	0.429357	14	147	14	55	MSPPISKKRKFINDGVFQAELNEFLARILAEDGYSGVEVRVTPIRTEVIIRATRTREVLGDKGRRIRELTSLVQKRFFNKLTNSVELFAERVENRGLCAMAQAESLRYKLLKGLAVRRACYGVLRHIMESGAKGCEVIVSGKLRAQRAKSMKFRDGYLISTGEPSKRFVNTATRSAQLKQGVLGIKVKIMLPTAIDTKTGLPSILPDNISVLEPKTDTVDAL
PBANKA_1217700	A0A509AQD4	ATP-dependent RNA helicase DDX6 OS=Plasmodium berghei (strain Anka) OX=5823 GN=PBANKA_1217700 PE=3 SV=1	49.3	25101	64967	23702	117862	97397	27569	605041	82085	150300	231453	260878	13702	24279	107439	13501768	12851	4	0.587328	0.233372	0.555108	0.419667	35	192	35	85	MSYKTNCVASNANTNALNNSNNLNKIEDNVIFDEAWKKKILEPLKDPRYKTEDVTKTKGNEFEDYFLKRELLMGIFEKGYEKPSPIQEESIPVALAGKNILARAKNGTGKTAAFAIPLLEKCNTHKNFIQGLILVPTRELALQTSAMIKELGKHMKIQCMVTTGGTSLREDIMRLYNAVHILCGTPGRILDLANKDVANLSGCHIMVMDEADKLLSPEFQPIVEELMKFLPKEKQILMYSATFPVTVKEFRQIYLSDAHEINLMDELTLKGITQYYAFVKERQKVHCLNTLFAKLQINQAIIFCNSITRVELLAKKITELGYSSFYIHARMSQTHRNRVFHDFRNGACRCLVSSDLFTRGIDIQSVNVVINFDFPKNSETYLHRIGRSGRYGHLGLAIN…
PBANKA_0405500	A0A509AFE2	60S ribosomal protein L7, putative OS=Plasmodium berghei (strain Anka) OX=5823 GN=PBANKA_0405500 PE=3 SV=1	30.5	0	68754	52030	25504	13378	31860	719479	33202	162858	351698	254966	13324	0	99713	13762353	0	2	0.236499	0.537166	0.555313	0.417462	13	98	13	49	MADRYEEKGENEIGNNMAALKAKRAKNAAAVKKRIMKKLKETKLINKKKRIELRARTLKYEKEYEEERRKITELKREARKNNCFYREAEKKVVFVIRLKGVNKLPPKVKSVFRLLRLLQVHNGVFVKVNKATKEMLKIVEPYVTYGYPSLSTIRNLIYKRGYIKDGKVRRYSRKKIQNNEDISKHLGKYNVHGIEDMIYQIYTCGSVFKKVNNFLWAFKLKPPKKGFKAKRHGFNEPRPGDWGNREEHINELVNRMI
PBANKA_1439200	A0A509ASB6	Polyadenylate-binding protein OS=Plasmodium berghei (strain Anka) OX=5823 GN=PBANKA_1439200 PE=3 SV=1	93.3	0	0	0	58377	0	0	317325	0	29802	94587	93452	0	0	10902	10051853	0	2	0.315183	0.430232	0.570065	0.416747	48	256	48	63	MIANSTNIMPPSFSTASLYVGDLSEDVTEAVLYEIFNTVGHVLSIRVCRDSVTRKSLGYAYVNYHNLADAERALDTLNYTNIKGQPARLMWSHRDPSLRKSGTGNIFVKNLDKTIDNKALFDTFSMFGNILSCKVATDEFGKSKNYGFVHYEDEESAKEAIEKVNGMQLGSKNVYVGHFIKKSERATNDTKFTNLYVKNFPDTVTEAHLKQLFSPYGEITSMIVKSDNKNRKFCFINYSDADSARNAMENLNGKKITEDGKIDYNYDPKKEESEKAANENYNNNNTTSEENATTSETPAEKKTTDSESATNKDATPGEDQTSANGTTTTVTSTTDAKTEETPNDNTANAGINASITEKKDKKKSGESTETPNILYVGPHQSRARRHAILKAKFDTLNTE…
PBANKA_0514500	A0A509AFX8	26S proteasome regulatory subunit RPN9, putative OS=Plasmodium berghei (strain Anka) OX=5823 GN=PBANKA_0514500 PE=4 SV=1	46.3	0	0	18723	72445	0	0	87832	28647	42746	21051	14651	0	0	17457	1548465	0	2	0.684979	0.177923	0.587221	0.408751	17	41	17	42	MSLTEEMNKMLNENESDLLNELEKKYNFIELNEIKKYKEKKHYHELTLEIQKFVNTKNIEDRDKFRLFYTYLSPIIKKLKKTIYAELLYIVTNNFDAEWTINYVKESEKKLENDKDAIIIYRCILILKYIKLNDFKSCENEIEFTKNMLQGVIGLNIIAHKFYNFALMNYYKALNKSELFVKYALLYLAYTPLNNLDESEKIEIATHICIYSIISEDVYNIGEIIQLPLISVCIKNDEQSNWLYKLIYAYNEGSIDMFNDVVKKYENNIKNSLLKNYEQSMLKKITLLALMDLAFKKKKQRSDIYFSEISQHCKVDINQVEKMLITAKSKNILSCQIDEIQKSVKITWVKPRVLNNEKIFLMKESIDKWIIHSKNLLAYVEDLSVELLVS
PBANKA_1351900	A0A509AQQ7	60S ribosomal protein L6, putative OS=Plasmodium berghei (strain Anka) OX=5823 GN=PBANKA_1351900 PE=3 SV=1	26.7	0	22500	71954	0	0	0	301634	22601	55710	221122	132372	0	0	17826	7226907	0	2	0.283826	0.514167	0.560219	0.407952	12	68	12	45	MAKNTKSGASADDKKKTLKHYVIKGQKKTLTPVRAKKTIAKKYYGKKLASKKKYIVQRKMRKSIQVGKVAIILTGKHMGKRCIITKVLKSGLLAVIGPYEVNGVPLKRVDPRYLIVTSTNVFDFNNLSQIKDKFIQAAERINDEIFIKSIDIKKRQKKLLKNKNESLFMNDVIQQIKEIRDSDPKMKRIKLLQKQLGDLLKPEISKDKMFRSYIKSKFTLRNNMSFHNIKF
PBANKA_1310800	A0A509APS9	40S ribosomal protein S5, putative OS=Plasmodium berghei (strain Anka) OX=5823 GN=PBANKA_1310800 PE=3 SV=1	29.9	0	0	0	0	0	0	365524	0	0	0	0	0	0	13263	16017716	0	2	0.91185	-0.0392322	0.596181	0.40254	15	108	15	58	MEDRGGFSRGFGRGARGARGVRGRGRGRGRGSAEDDLKNWVPVTKLGRLVKEGKISSIEEIYLHSLPIKEYQIIDYFFQPNECAHPLKDDVVKIMPVQKQTRAGQRTRFKAFVAIGDGNGHCGLGVKCAKEVATAIRGAIIAAKLSLIPVRRGYWGNKIGDPHTVPMKVSGKCGSVRIRLIPAPRGTQIVGAPTTKKMLNFAGIKDCFSSSCGKTKTRGNFLRAIFNALSKTYGYLTPDLWKVTKFDKSPYEEWSDFLETYQNVKGIKTII
PBANKA_1461800	A0A509AVS4	26S protease regulatory subunit 8, putative OS=Plasmodium berghei (strain Anka) OX=5823 GN=PBANKA_1461800 PE=3 SV=1	48	0	0	27806	58972	0	11867	65757	139896	17965	32767	64710	0	0	35268	2436848	0	2	0.937216	0.0346105	0.595302	0.392516	16	80	15	52	MAAVDMQMRSSDLGEGKKNENDKIHGNKNDEEMQSGIKTYYEMKIEEYESIINKKLQNKKRLEAQRNELNTRVRELRDEIQYLLEAASYVGEIAKPMGKNKVLVKINPEGKYVVDIASHIDITKCTPNTRVALYNDSYKLHKILPSKVDPLVSLMKVEKVPDSTYEMVGGLDQQVKEVKEVIELPVKHPEIFESLGISQPKGVLLYGPPGTGKTLLARAVAHHTDCTFIRVSGSELVQKYIGEGSRMVRELFVMAREHAPSIIFMDEIDSIGSQRIEGEHGDSEVQRTMMELLNQLDGFESTQNIKVIMCTNRIDILDDALLRPGRIDRKIEFPNPNVEARIEILKIHSRKMNLMRGIDMVKIATDMNNCSGAEVKAVCTEAGMFALRERRVHVTQEDF…
PBANKA_1401300	A0A509ATD7	40S ribosomal protein S7 OS=Plasmodium berghei (strain Anka) OX=5823 GN=PBANKA_1401300 PE=3 SV=1	22.5	0	0	35166	32566	0	0	338404	0	0	156727	85854	0	0	15831	7568977	0	2	0.719682	0.166553	0.590622	0.379402	12	58	12	57	MVSVKSKILKSNPSDLEREIAQCLVDIELSASSDIKNDTKEIKILSCDLIEVEKIKKKTILIYIPYKIYATYVRKIQRKLINELEKKTKKYVVLVAKRTILKSRQKTKSFKILPRSRTLTSVYDSVLEDIVSPSEIIGKRISMKSDGKRVFKIMLDPKERQRDNIDEKLISFAAVYKKITKRDTIFSLPPSNEK
PBANKA_1137900	A0A509APL9	Proliferating cell nuclear antigen OS=Plasmodium berghei (strain Anka) OX=5823 GN=PBANKA_1137900 PE=3 SV=1	30.7	26732	37160	268390	303013	10686	22529	191013	79530	332628	301833	163408	23468	26685	267061	5463298	0	3	0.333776	0.450155	0.611819	0.362861	14	124	14	67	MLEAKLNNAYILKKLFECIKDLVNDANIDADENGLKLQALDGNHVSLVSLHLVDSGFSHYRCDRERVLGVNIASLNKVFKLCGINESVVISSKDDEDNLNFVFENNKEDKVTNFSLKLMSIELDSLNIPDCDEGFDAEVELSSKELTNIFRNLSEFSDTVFIEIDSNSIKFTTKGLVGDAEVALKPRESTSEDDVGVTIKSKKKIKQSFAIKYLNLFSKSSILSDVVILGLSDSRPIEFKYEIKDTSPDSDALKVGFIKFFLAPKMDDDMDNKD
PBANKA_0510900	A0A509AGJ2	40S ribosomal protein SA OS=Plasmodium berghei (strain Anka) OX=5823 GN=PBANKA_0510900 PE=3 SV=1	29.7	23869	58445	261635	178046	42907	57321	572459	217248	211623	837051	371271	65395	58914	386298	17290883	0	3	0.225196	0.469247	0.624702	0.355842	12	124	12	57	MSNKKVQSPKEESIAKMLICKVHIGTKNLENKMKRYVYTRAKDGVHIINLAKTYEKLQLAARVIVAVSNPADVVVVSARPFGSRAVLKFAQYTGAQAIAGRWTPGMLTNQIIQKFIEPRLLIVTDPRTDAQSVKESAYANIPVIALCDSDSPLEHVDIAIPCNNKGKESIALMYWLLAQEVLYLKGSIPRSQAWDVMVDMFLWRDPEQFELKNLANEEAAPTAPHLADNQYATEAPYDDWNKKDDWNDNANEEWKNPITVDEW
PBANKA_1424300	A0A509AU99	Nucleoplasmin-like domain-containing protein OS=Plasmodium berghei (strain Anka) OX=5823 GN=PBANKA_1424300 PE=4 SV=1	32.6	0	0	141736	208292	0	0	488271	34125	46490	72673	254935	0	0	44980	11881628	0	2	0.590025	0.275085	0.658873	0.322828	15	91	15	48	MFYGKVIKSEETVIPEPKDGYSVIHLSRACLNNPQDDGKLYVQVEDANGCYNICCLQKNVCEDTPLDIFLMLDNEVKIKTSGTTDEVHVVGYYEVSFGQDNLDEDEDEFDEDDEYENEAARILTKKNTLKNSSAFRLKNKKNEDGEEDEEDEDDEDDEEDEDDDEDEEDEDDEDDEDDEEDEDNEEDEDDEEDDEEGDKKKKKGNNKRSLDGNGSGPSKKSKLDDEEQYEKNLIEFIKKNGKTTLTELGKVKKPAGLKMKLGFFVKKRPSIFKLDNDSQIVSLK
PBANKA_0941500	A0A509AQH1	40S ribosomal protein S4 OS=Plasmodium berghei (strain Anka) OX=5823 GN=PBANKA_0941500 PE=3 SV=1	29.8	16201	52793	52380	24991	17593	55364	385605	59011	29710	159313	55686	28570	0	136076	15481858	0	2	0.862131	0.0548999	0.671627	0.318389	17	123	17	61	MGKGIKKHMKRVNAPSHWMLNKMDGQYAPKTSSGPHKLLESIPLVILLRNRLKYALTFDEVKMILIQKIVKVDNKTRTDCTFPVGLMDVIHITKSNEFFRLLYDVKGRFVPHRITNEESKYKLCKVKKIILRKGKLSIAITHDGRSIPYIHPEVKVNDTIRLDLETGKVLEHLKFQVGNMVMVTAGHSVGRVGTILSIDKNIGTYDIIHVKDSRGKIFATRLSNIFVIGDALKPYISLPREKGIKLDIIEERRNRLKAQNN
PBANKA_1211000	A0A509ALY6	GMP synthase (glutamine-hydrolyzing) OS=Plasmodium berghei (strain Anka) OX=5823 GN=PBANKA_1211000 PE=4 SV=1	62.7	0	23606	102101	57333	0	0	230731	240911	59396	58913	69259	0	0	58934	3169099	0	2	0.770382	0.154047	0.673646	0.31504	23	101	23	56	MEGDNYDIILVLNFGSQYFHLIVKRLNNIKIYSETKDYNVDLKDIKNLNIKGVILSGSPHSVNAKNGPHIKKEVLNYFIENKIPIFGICYGMQEIAFHMNGQVGKSKNSEHGSTEVTLISNDYKDNELYKNYKLLEKDSNCLLFDDIKNTNNMNVWMNHTEEVIEIPENYYLVNSSENCFICAFYNKENNIYGVQYHPEVYETADGDQMFYNFAYKICKCTKTFDPIKYHEVEFNNIKKHAHDHYVIAAMSGGIDSTVAAAMTHKIFKDRFYGIFIDNGLLRKNEGEKVYKFIKSTFPDMNITKIDASENFLNQLKGVTDPEQKRKIIGKLFIEEFEKAVYSMDIDIEKTYLLQGTLYPDIIESKCSKNLSDTIKTHHNVGGLPKNLKFKLFEPFKFLF…
PBANKA_1452600	A0A509ASA4	Calcyclin binding protein, putative OS=Plasmodium berghei (strain Anka) OX=5823 GN=PBANKA_1452600 PE=4 SV=1	26.6	0	0	54915	87593	0	0	227172	30909	26820	0	77268	0	0	10043	4118087	0	2	0.86886	0.0796968	0.672291	0.314735	12	41	12	54	MESEQLKQLNGDIEELKTILSKVVRENVKRKISRVIEDITVEIAKLKLDEFQKPNKINITNSEKNDNNISYSSVPSFAWNQEKNKVTVFLTIKNIQNISKENIISEFNERDFEIKIHNVDFKNYRFCIKKLHDKIIPNKCSIKIKKDLIQVYLIKQDNKQWDNLHFKESPMSKIRPPKLNDQTEPSAMLMDMMKQLYQEGDSDMKRTIAKAWCEANDKKNDFGSAF
PBANKA_1144000	A0A509APS4	26S proteasome regulatory subunit RPN11, putative OS=Plasmodium berghei (strain Anka) OX=5823 GN=PBANKA_1144000 PE=4 SV=1	35.1	0	23286	23006	39239	0	19054	71311	38359	18946	33964	26574	0	0	14678	2080195	0	2	0.749604	-0.136437	0.666003	0.312517	10	36	10	43	MAGIPSSLRELFYSFSDGNGMSNEPLADTSEQVYISPLALLKILKHGRAGVPMEVMGLMLGEIVDEYTIRIVDVFAMPQSGNSVSVEAVDPVYQTNMLEELKKTGRHEMVVGWYHSHPGFGCWLSGTDVNTQKSFEQLNPRTIGVVVDPIQSVKGKVVIDCFRLINPHILMLGQEPRQTTSNIGYLTKPTLTALVHGLNRNYYSIVINYRKNELEKNMLLNLHKDIWVNPLKLLEFDEQKKNTDETLESIKKLTSLYNKNLSNEMKKTREEILLENIGKIDAKKRIQNCVETLLNDSILTCIGTMANTLFF
PBANKA_1360300	A0A509AQX1	DNA/RNA-binding protein Alba 4, putative OS=Plasmodium berghei (strain Anka) OX=5823 GN=PBANKA_1360300 PE=4 SV=1	42.1	61105	138965	415420	367979	126465	79774	1703702	232430	491521	809016	808264	113381	55531	419231	39952042	21456	4	0.298201	0.396469	0.673503	0.310367	23	374	23	61	MENNKKNNQKQNSIDETEFPNSKVLLVSVKRTRRFLERTARELLAGGTRYIILSGLGDALPLCVQLQASLQSKNAATVVKIETSYSYFNTNYSYTPGLKIYMEKHPEFKGSRISPGYVSFCEKPDKFTPIFDETPNEYICSVNAGDNNLHVGGEGINAAFSELLSSHGHEVDKYESLFKELLSKAVKENSEKPDDEVKSILYESVEKKYPDVKLALCRVRNSLKKGSDNTTGSVFIVTFKKKFPHKKEKNMGMVYVVGPKGKNFSSVEDFLDAVHETAENLMTALCDYNGLVKREEIKHVRMNTCRICLFSGHAFKHSNASKLDVAKSILNGLAVGYRHGPSPRLNFAYDENVFKDAWIETTGLQVFNHNEKEQ
PBANKA_0937700	A0A509AK89	60S ribosomal protein L36 OS=Plasmodium berghei (strain Anka) OX=5823 GN=PBANKA_0937700 PE=3 SV=1	12.7	0	17388	72922	0	0	0	256500	54679	28662	93380	202657	0	0	54620	1692830	0	2	0.526808	0.332847	0.653547	0.310209	4	31	4	36	MGRKSTIKPSTGIAVGFNSGHIVTKRSVKKSIKKKKVPKNKDLINDVVREIAGFSPYEKRLIELIKVGTSAATKRSLKYAKKKLGTHKRGKAKREEIQKIVMMQRRKAATDKH
PBANKA_0819900	A0A509AJH3	Nucleosome assembly protein OS=Plasmodium berghei (strain Anka) OX=5823 GN=PBANKA_0819900 PE=3 SV=1	31.7	0	36584	85463	116241	26978	0	253513	50205	240510	107770	90168	33995	0	82395	8211369	0	2	0.244768	0.521397	0.677605	0.307261	20	91	20	69	MKRDRSENSVENTTDPKHSKIDNDDPLIPFIKDFEDIQKDIEQLDIKCAHEQMNIQKQYDEKKKPLFDKRDVIIQKVPCFWANTLRKHPALSDIVPEDIDILNHLTTVDLKDNMDNNGSYKITFTFNEKAKEYMEPLVLVKHVTFDNNQEKVVECTRIKWKEGKNPIAAVSNSRIDIDNEMPKWSVFEWFTTEELQDKPDLGEIIRREIWHNPLSYYLGLEDFDDFDEDFDDEDDEDEDDENEDEDEDDDEENEEDEDDEDGKDNDD
PBANKA_0502200	A0A509AFY9	26S proteasome regulatory subunit p55, putative OS=Plasmodium berghei (strain Anka) OX=5823 GN=PBANKA_0502200 PE=3 SV=1	55.2	0	17908	27037	108480	0	27544	157694	196639	44719	78131	51115	0	0	75915	2574889	0	2	0.924614	-0.0481071	0.67034	0.306174	17	75	17	52	MEDTAAKIIGSHDSLLTDPRIAQDFSAETDELLAKAENYFKVGDFELIIEELILLEKKCRQSYDGISTSKICCFILNKYKLMENYKKVNEYLIFFNKKRGQLKRTIIDIINLCKSWIVDIQNKEEKLNLINTLCTISEGKIFVEVERSEIIRILSKIKEDDGNIEEAANILQDVHVETFISMDKRDKTEYILEQMRLVLLRKDFIRCHVISRKINPTLLNTDEFADLKLKYFLYMIQYYINEESYSDVANCYEQRFNTDSVQNDPNLWIDELKCYIIFLILSPFQEQQTKFLNLIKLQKKKLKEIPTYEQMVNDFIKQDLIEWPLLYEQELQSFYIFNDSVFVGGENRWHLFKKKVMHHNIHVISTCYSKISLQRLAQLINSTNEESENLLLELVSNKM…
PBANKA_1407600	A0A509AQ32	60S ribosomal protein L24, putative OS=Plasmodium berghei (strain Anka) OX=5823 GN=PBANKA_1407600 PE=3 SV=1	18.9	0	47262	38884	0	22979	23941	203530	36165	33978	136294	158558	0	11095	33796	4770237	0	3	0.646817	0.201894	0.676842	0.291473	5	38	5	28	MASIKTTVKTEACSFSEYRIYPGRGQKYIAKDGKVYFYLSSKFASLALQKKKAAKLRWTQTWRRNNKKTKVEATQRRRYKKTIKVQKAVCGLSVEDIRNRKAYVQSIEAKNKARFAGKEKEDKKKGKDDKKKSVAPAQQKKEFTKGNKLMNLAKSKMHKMMKK
PBANKA_0614500	A0A509AJ64	Eukaryotic translation initiation factor 3 subunit I OS=Plasmodium berghei (strain Anka) OX=5823 GN=PBANKA_0614500 PE=3 SV=1	37.2	0	17315	44165	0	0	20204	2336236	67185	34351	83682	44397	0	0	56744	6029585	0	2	0.91309	-0.0581343	0.724442	0.258785	14	86	14	67	MKRKYLCGHNRPLTHVNTNCDGDLLFTTGRDKKFILWNLADGNQIGLYECSGAVYNSDVTFDSKRVVCSSAANKIYIFDVYTGETLKVIDESGPVRFVEFNRDPLNQNRIIAAIDRLKADHKRFIKLYDLKSDTLIWKQEHESRCIQVRWCFFDKLILSAHENGEIVIWNSEDGHQIRKFQAHTKEVTNLSFDKDRMIMLSSSTDGTAILRDAVNFDIINEYKADRPLNTCDISPLFRSENNSKNHIILAGGQAAEHVTTTATGEGKFQTLLYDIIHANELGSIKGHFGTVHSIKFLPHGDGFVSGGEDGFARIYHFDQDYFIGKYD
PBANKA_1135700	A0A509APW5	CUGBP Elav-like family member 1, putative OS=Plasmodium berghei (strain Anka) OX=5823 GN=PBANKA_1135700 PE=4 SV=1	57.2	0	56194	112356	220410	0	0	643028	173563	0	243144	217855	0	0	90368	11112324	0	2	0.896736	-0.072074	0.721567	0.248254	17	122	16	60	MDNNDNIDSNDNSSDTNTANYNQGKNDIISEEIDFTKEDNELSGSTKNSKSKNDSSAKGKSSDKDDINMDYSDHTFPCHPAPPVSIKLFIGRVPKNYEEEQLRPIFEEFGIVNEVVIIRDKITNIHKSSAFVKMASISEADNAIRSLNNQRTLDQQLGSLQVKYASGEVMKLGFPQNVESGVDQAKLFIGSLPKNITEESIKDMFSVYGSVEEVFIMKDNSTGLGKGCSFVKFAYKEQALYAISSLNGKKTLEGCNRPVEVRFAEPKSSKQSQSQLGIQPIQNAPHGISPQAHPGTPNNINYGNNFGVNNNYPRQVGVWKEYYSGEGRPYYYNEQTNTTQWEMPKEFETLFMNNNPNIHNLSDSSGPPGANLFIFHVPNEWQQTDLIQAFSPFGELLSA…
PBANKA_1215600	A0A509AQP3	40S ribosomal protein S3a OS=Plasmodium berghei (strain Anka) OX=5823 GN=PBANKA_1215600 PE=3 SV=1	30	0	50824	62525	33082	16808	26056	683220	57927	54185	208503	278240	0	0	49596	12411229	0	2	0.653533	0.217691	0.744749	0.229205	27	170	27	68	MAVGKNKRTSKGKKGGKKKVTDVFTKKEWYDLNAPKMFMVRKFGKTLVTKTIGKKLATDGLKGRIYEVNLADLNNDEDQAHKKIKLICDHIINRDCYTDFCGLSITRDKLCSLIRKGYTLIEGCTDVKTIDNYHLRMFCIAFTKKRPNQTKTTCYAQTSQIKKIRKKMVDIMHAEASKVLLKDLVKKIIPESIGKEVEKQCKKIFPLQNVLIRKVKILKRPKLDISKLMELHSDPKEDSGKNVKSLPESKEATNILTAELKH
PBANKA_1404900	A0A509ATH3	26S protease regulatory subunit 10B, putative OS=Plasmodium berghei (strain Anka) OX=5823 GN=PBANKA_1404900 PE=3 SV=1	44.7	0	16895	18076	74337	0	19929	106172	60869	21865	26587	21940	0	0	28841	2270902	0	2	0.600618	-0.221653	0.77798	0.209619	18	92	16	62	MDNKESVRLYVKKVIEHREIESKVKKLRLDIKELNKKYEKTEDNLKALQSVGQIIGQVLKQLEDDKFIVKASSGPRYVVGCKSKINKSKLEIGTRVSLDMTTLTVMKRLPCEVDPLVFNMISDIDKGENSTNKVNYNQIGGLSEQIRQMREVVELPILNPFLFKRVGIKTPKGVLLYGPPGTGKTLLARAMASNINCNFMRIVVSSIVDKYIGESARIIREMFTYAKEHQPCIIFMDEIDAIGGRRFSQGTSADREIQRTLMELLNHLDGFEELGNVKIIMATNRPDVLDPALVRPGRLDRKIEIPLPNETARIEILKIHANKMTKMGDIDYESVCRLCEGFNGADLRNVCTEAGMFAIRAMRDYVIEEDFYKAARKINEAKKLEGKLEYEKI
PBANKA_0809100	A0A509AIC9	Proteasome activator 28 subunit beta, putative OS=Plasmodium berghei (strain Anka) OX=5823 GN=PBANKA_0809100 PE=3 SV=1	32.8	0	11003	36759	120059	0	38907	83728	110315	38079	66862	54351	0	0	20907	2153012	7563	3	0.838347	0.10502	0.778243	0.206966	12	48	12	58	MESLISKIDKIDPSNPKIKEEYNKFKCDITKQTIESLKERIPERIIFFNNLVNVNSEPGAILNVKDLDSTSYKYKIEQFEENARKKAKVNNSNSKENKSDKNNNDTNIKNFPNNENSKIIINDQLVYTHYAPSHKQIYDELEKIKSYASELIEMIGNIKLWIQLNVPRIEDGNNFGVGIQEEAIQELARVEESAFNLYDAIVKYYMERAKIFTKVIKYPNVLDYQEAIREIDEKEWIHIKITIIDMRNNYIMLYDLLCKNWEKVVKPKNEDAHNRMTF
PBANKA_1365500	A0A509AT96	Exported protein IBIS1 OS=Plasmodium berghei (strain Anka) OX=5823 GN=PBANKA_1365500 PE=4 SV=1	37.4	11769	11236	166779	229081	17879	11550	119924	14169	524731	436650	198165	22363	0	311577	1318042	0	2	0.075986	0.877496	0.761168	0.202113	9	58	9	39	MKKGNNGNFSMARNCECKKIDNDDMVSSTRYSNKFGEKFNLISCTKLFALGMLFLICKNCDNSTQTTSAYQEYQYNGLILGKSRILSELDQNKDQNLGYKTQSYEDSSTENASTSYMSTLKTDEESNTAGEDRKEDNNDAAFIGKKSTEKKPHIDRISSTLNPESTDRRKSSDEQKSSNDKNIFKDVDDLINGIKSRYQDITNKIKSPEFQNECKGYINVAKEMIEDHRNHAMRFVSRNLNSLGIDQIFNDEHGGYAFLAKIMLTKVFVDNLFVPNFLKNNSTILSTIVYFLIISFIVSNYLDATQNNERERKNLNKSNIFCRAKPM
PBANKA_1440700	A0A509AV22	Ubiquitin-activating enzyme E1, putative OS=Plasmodium berghei (strain Anka) OX=5823 GN=PBANKA_1440700 PE=3 SV=1	128.9	0	0	48674	174474	0	0	54183	121986	0	0	10841	0	0	13273	1383481	0	2	0.57102	-0.298731	0.786974	0.201216	23	77	23	31	MQSNNPLKKQRTYEDIDLKGIEKNRNEENSIKLEKMEENQIDANLYSRQLGTYGFELMNKLIKMNILIINVKGVGLECAKNIILSGPKSVCIYDNDICEISDIGVNFYINENHVENKICRSNAVLSNLQELNNYVHVYNYTEDLNNSKFIEQFDVVVCCDTKDSDIIKYNNLIRSIETKNIAFLSCNVYGLCGYIFNDFGNNFICYDKDGENIKSCNISKISKDVNGIVSFDFDKSSPFQNGDFVKFTNVEGMTEINGKIYQIKNLKKYTFTIGDTSKFSDYIKGGECTQIKTNLKLNFKPYEYIKNKPLFGLSSDNSEQSNNVKIVDDKKGGKIIFEKEIFPTSFIISDYSKLNLSNYLHYAIQGLKWYEIEYNCLPENNQNDEFEKIYKKACDLNSK…
PBANKA_0914300	A0A509ALW4	Protein disulfide isomerase related protein, putative OS=Plasmodium berghei (strain Anka) OX=5823 GN=PBANKA_0914300 PE=4 SV=1	49.2	0	0	40617	46555	48387	59479	120247	96398	106160	183986	173657	0	0	189597	1284488	0	2	0.332185	0.473131	0.774474	0.19938	20	100	20	50	MKLYGKIHFILPVLYLFAKYASSLYTNVKEIKTVESLNEFDELINSQKKCLVQFYATWCRVSRGFSNDFINIAKTVKDDILVIAIKNEDIINKYKIKTYPNIQLFFTNDKKEKHIEQFDGNYKIKDVVSFIYDNIKNYRLKELNIDVGKKDNSNKKNKKNKNSGKVIVLNDSNFDQNVLKNDDNVWFVFFYAPWCGHSKPIHPMFDELAKKTSHLKNARIAKIDATVEQRTAQTYEIKHYPSFRLFPSGNKKPHTAIDYNESRTVNDLYQFFLKYYKEKKEIIQLTSRNVFDEHCENDVCLLAILPSKEDIEPSSLKSYIQILTSVIKDVNHLPVTLMWTHAGDQLDIVQKLNLTFGFPTVIAISFSKNVYSILKGNYSEQSIKNFVIQMMTGKSSVDN…
PBANKA_0941900	A0A509AMA0	Histone H4 OS=Plasmodium berghei (strain Anka) OX=5823 GN=PBANKA_0941900 PE=3 SV=1	11.4	273150	141142	372295	781002	0	80768	787544	77094	124964	504454	429770	0	52307	261535	16484746	0	3	0.939253	-0.0407871	0.785862	0.192599	9	86	8	53	MSGRGKGGKGLGKGGAKRHRKILRDNIQGITKPAIRRLARRGGVKRISGLIYEEIRGVLKVFLENVIKDSIMYTEHAKRKTVTAMDIVYSLKRQGRTLYGFGG
PBANKA_1019500	A0A509ANB0	60S ribosomal protein L5, putative OS=Plasmodium berghei (strain Anka) OX=5823 GN=PBANKA_1019500 PE=3 SV=1	33.9	28933	143690	359038	129615	35957	61492	1273024	98206	107343	688558	303435	33931	21534	237632	20059845	0	3	0.70761	0.159947	0.79643	0.187861	21	208	21	59	MAYVKVVKNKAYFKRYQVKYRRRREGKTDYRARKALILQDKNKYNAQKLRFIVRKTNNQIICQIASSHIEGDKILSEAKSKELIRYGIPVGLKNYAAAYATGLLCARRFLKSLNLDNQFIGVEKVTSESVAEDGDKEEEGDRKPIKAFLDVGITRTTTGNRVFAALKGACDGGLNIPHGNNRFPGSKNEFNPEQLRKNILGIHVAEYMASMKEEDMDKYKAHFNDYLKHKIDENNIEKMYLTAHEKIRKNPEKKAKKAGKKFIAKHQKPTKLNAKLRKQRVKEKLEKYIEKLQ
PBANKA_0522700	A0A509AF83	Tubulin alpha chain OS=Plasmodium berghei (strain Anka) OX=5823 GN=PBANKA_0522700 PE=3 SV=1	49.7	616336	935193	1426009	3360781	843494	993649	4413461	3339730	2719813	2680304	2164009	721068	269160	2106068	70634048	376656	4	0.712849	0.129434	0.805629	0.184212	27	864	9	68	MREVISIHVGQAGIQIGNACWELFCLEHGIQPDGQMPSDQVVAGGDDAFNTFFSETGAGKHVPRCVFVDLEPTVVDEVRTGTYRQLFHPEQLISGKEDAANNFARGHYTIGKEIVDICLDRVRKLADNCTGLQGFLMFNAVGGGTGSGLGCLLLERLAIDYGKKSKLNFCSWPSPQVSTAVVEPYNSVLSTHSLLEHTDVAIMLDNEAIYDICKKNLDIERPTYTNLNRLIAQVISSLTASLRFDGALNVDVTEFQTNLVPYPRIHFMLSSYAPIISAEKAYHEQLSVSEITNSAFEPASMMAKCDPRHGKYMACCLMYRGDVVPKDVNAAVATIKTKRSIQFVDWCPTGFKCGINYQPPTVVPGGDLAKVMRAVCMISNSTAIAEVFSRMDQKFDLMY…
PBANKA_1028400	A0A509AJR9	60S ribosomal protein L10, putative OS=Plasmodium berghei (strain Anka) OX=5823 GN=PBANKA_1028400 PE=3 SV=1	25.2	42055	64875	123605	57662	61739	46002	216288	80926	54020	138783	171404	39277	0	81893	7383566	32241	3	0.748866	0.0816398	0.809076	0.181139	10	43	10	44	MGRRPARCYRYCKNKPYPKSRYCRGVPDPKIRIYDMGRKKADVNEFSGVVHLVSYEYEQISSEALEAARISANKYMITNCGKDNFHLRVRIHPFHVLRINKMLSCAGADRLQTGMRGAFGKPNGVVARVDIGQVLLSIRTKENFVSKACEALRRAKYKFPGRQKVFVSNKWGFTNFSKDQYQNYKKKGRIISDGVTCKFIREKGPLDKIYKDINTIIES
PBANKA_1460400	A0A509AW13	peptidylprolyl isomerase OS=Plasmodium berghei (strain Anka) OX=5823 GN=PBANKA_1460400 PE=4 SV=1	35	0	0	204665	169803	0	0	216899	311976	99759	140473	82498	0	0	53032	3093926	0	2	0.665243	0.250724	0.806661	0.178913	18	98	18	65	MENIENIENIEKIHLTDDGGVIKTILRKGNEGEENVPKKGNEVTVHYIGKLESDGSIFDSSRQRDVPFKFHLGNGEVIKGWDICVASMKKNEKCLVRLDSKYGYGKEGCGETIPGNSVLIFEIELLSFKEAKKNIYDYTDEEKIQAAFELKDEGNEFFKKNEINEAIAKYKEALDYFMHTDEWEDELLEKKKNIQIICNLNLSTCYNKNKDYPNAIEHASKVLKLDKNNVKGLYKLGVANMNFGFLEEAKINLYKAASLNPKNLDIRNSYELCIAKLKEARKKDQITFGGMFDKGSLYEEKKTNPI
PBANKA_1206900	A0A509ATN3	Tubulin beta chain OS=Plasmodium berghei (strain Anka) OX=5823 GN=PBANKA_1206900 PE=3 SV=1	49.8	332615	430086	1091496	2263323	594223	485343	3074873	2404500	1500695	1634155	1685100	469428	196113	1292056	55254842	163858	4	0.693649	0.145411	0.815175	0.175742	31	1152	28	82	MREIVHVQAGQCGNQIGAKFWEVISDEHGIDPSGTYRGDSDLQLERVDVFYNEATGGRYVPRAILMDLEPGTMDSVRAGPFGQLFRPDNFVFGQTGAGNNWAKGHYTEGAELIDAVLDVVRKEAEGCDCLQGFQITHSLGGGTGSGMGTLLISKIREEYPDRIMETFSVFPSPKVSDTVVEPYNATLSVHQLVENADEVQVIDNEALYDICFRTLKLTTPTYGDLNHLVSAAMSGVTCSLRFPGQLNSDLRKLAVNLIPFPRLHFFMIGFAPLTSRGSQQYRALTVPELTQQMFDAKNMMCASDPRHGRYLTACAMFRGRMSTKEVDEQMLNVQNKNSSYFVEWIPHNTKSSVCDIPPKGLKMAVTFVGNSTAIQEMFKRVSDQFTAMFRRKAFLHWYT…
PBANKA_0821700	A0A509AIS9	Inosine-5'-monophosphate dehydrogenase OS=Plasmodium berghei (strain Anka) OX=5823 GN=PBANKA_0821700 PE=3 SV=1	55.9	0	0	51957	235873	0	0	58827	73005	28935	35999	0	0	0	19720	1702441	0	2	0.702884	-0.192342	0.813298	0.175374	19	97	19	48	MANGWDAEKIFGSTISYTYDDIICMPGYIDFPLSEIDLSNNMTKDICLKTPIISSPMDTVTEHKMAISMALCGGLGIIHNNMSIENQIEEVKKVKRFENGFIFDPYTFSPEHTVADVLCVKNKVGYKSYPITSDGKVGSKLVGIITGIDYLYLTNPDVKIKDIMTTELVTGKYPISLSDANKVLCNEKKSILPIVNDNYELIALVCRNDMHKNRIFPHASKRENKQLIVGASISTRGSDLEKVNKLVQNMIDIICIDSSQGNSIYQIDMIKKIKSAYPDIPIIAGNVVTSNQAKNLIDAGADVLRIGMGSGSICTTQDVCAVGRAQGTAVYHVSNYAHTRNIKTIADGGIKNSGNIVKALSLGADFVMLGNLLAATEESCSEYYFENNVRLKMYRGMGS…
PBANKA_0203000	A0A509ADC9	Chromatin assembly factor 1 protein WD40 domain, putative OS=Plasmodium berghei (strain Anka) OX=5823 GN=PBANKA_0203000 PE=4 SV=1	50.5	13239	60093	266748	786631	0	27186	333954	446691	414204	318906	260241	28733	14839	194745	6039472	12839	4	0.509492	0.368347	0.811605	0.173361	18	194	18	54	MNALKECKKRKSNALDEACLELSEEPTNEEIMKEEVENVETQFANWKTNSGLLYDFVCRKELEWPSLSMDFGDYSDENIKDNVLNQIVCVGTHTSNNEPNYLYVCDVLFPLEQLPQDKCVYKINESYEGFDFCPEKNKITIKSKIYHEGEVNRIRFLPLEKKHIVVTKAIDGNLHLFDINKHSIDDTTNSDSRKMSPEISFIGNNSDGFGLEFNSLKKYALTCGNDGSINVYDYNDLSAKSLNPFYSVKYKSPINDVSPTNDPNLILACADDGYILMYDLRIKTTEPAQQVLGQQVPVNAISLNTFTGHFASGSDNGKIKVWDIKKFNEPAHIINAHKEAIIRLNFSPNDSSILASASNNRFINVYDLNKIGEELDAIDLSDGPSELIFSHGGHTQPIT…
PBANKA_1416300	A0A509ATZ6	40S ribosomal protein S19, putative OS=Plasmodium berghei (strain Anka) OX=5823 GN=PBANKA_1416300 PE=3 SV=1	16.9	0	0	70680	21401	28280	0	224586	0	48197	171971	209193	0	0	23090	4840788	0	2	0.407629	0.39979	0.802598	0.17235	7	50	7	62	MEDANKPKKRTFRTFHYRGIELDKLLELNQEELVKLLPARQRRKFRRGIDKKAKSLLKKLRKAKKECEIGEKPKPIPTHLRNMTIIPEMVGSIVAVHNGKQYTNVEIKPEMIGYYLGEFSITYKHTRHGKPGIGATHSSRFIPLK
PBANKA_0833100	A0A509AL25	M18 aspartyl aminopeptidase, putative OS=Plasmodium berghei (strain Anka) OX=5823 GN=PBANKA_0833100 PE=3 SV=1	56.3	10663	0	25339	156836	0	0	63101	171318	30249	16692	24414	0	0	16851	1260348	0	2	0.628007	-0.254846	0.817589	0.170694	10	46	10	31	MDKKAREYAQEALKFIQRSGSNFMACKNLREKLESHGLIHIKEGDQWTLQKNQGYVLCKENRNICSFFVGKNFNINNGSILISIGHIDSCTLKISPNNRVTKDQISQLNVECYGSGLWHTWFDRGLGLSGQVVYKKDNKLIEKIIQINKSVIFLPSLAIHLQNRTRYDFSVKVNYENHLKPILSTLLYEKLIKGNENISNIDDDDNNSKNLNSSPLLYILANELKCKEEDILDFELCLMDTNKPCFTGVYGEFIEGARFDNLLGTFGVFEAYVELIKILKNENNKNENLGNNLYICIGYDHEEIGSLSEIGAQSYFTKSFIERILGNIFKNELKNNDITVDEIYGSLSSKSLILNVDMAHCGHPNYPETIQQNHHLRFHEGIAIKYNTNKNYVTSPYYA…
PBANKA_1217600	A0A509AQR5	Histone H2A OS=Plasmodium berghei (strain Anka) OX=5823 GN=PBANKA_1217600 PE=3 SV=1	16.5	486634	0	327990	591003	0	96667	535721	95043	203690	287478	398225	120476	74746	117024	9609550	0	3	0.490534	0.356796	0.835283	0.15694	7	59	5	49	MEVPGKIIGGKVGGKVGGKVLGLGKGGKGKTGSGKTKKAPLSRASRAGLQFPVGRVHRMLKTRISSDGRVGSTAAVYAAAILEYLTAEVLELAGNATKDLKVKRITPRHLQLAIRGDEELDTLIKATIAGGGVIPHIHKALMNKVPVPPPQTKKPKKN
PBANKA_0924900	A0A509AJX8	Translation elongation factor EF-1, subunit alpha, putative OS=Plasmodium berghei (strain Anka) OX=5823 GN=PBANKA_0924900 PE=4 SV=1	59.9	0	9525	25506	315798	0	0	61191	352854	17290	22734	24066	0	0	15719	3886277	0	2	0.403687	-0.423508	0.833672	0.153347	12	44	12	35	MNNEPFTFNANAPVYYPGTPYNVEDKNERSIDSNNIISENINDGDSIAEVENKISKMCLTPEKNEEIEVAKVEKEIQEDKGVDKKVNLVQVDSRPHLNIIFIGHVDAGKSTACGNILYILGYVDDRTIEKYEREAKEKNRESWFLAFIMDINEEERQKGKTVEVGRAHFETKDRRFTILDAPGHKNFIPNMISGAAQADIGVLIISARKGEFETGFERGGQTREHTLLAKTLGINQLIVAINKMDDPTCNWSESRYDEIQKKITPFIKSCGYNINKDVFFVPISGLSGQNLSEHISDKNSKLYDPRGSWYDISKPTLFQILNSLSPPPWDENGPLRIPLLEGYKDNGIVAVGKIESGTLYGSNMNCILMPNKVKVKVTNVYVEDDEVPYAKPGENVRAK…
PBANKA_0306800	A0A509AEV0	ATP-dependent RNA helicase UAP56, putative OS=Plasmodium berghei (strain Anka) OX=5823 GN=PBANKA_0306800 PE=4 SV=1	53	23015	72527	283929	409495	27247	82592	1018531	393470	254657	439903	448143	82928	0	366108	19227269	22187	3	0.464041	0.306197	0.852765	0.139039	31	306	31	72	MAAIDHNVQDELVDYEDDDNMLDNKDVKCDIGGNLLNNNNKGVNESGAMRGSYATVHTGGFKDFFLKPELLRAISESGFEHPSEVQQETIPAAITGTDILCQAKSGMGKTAVFVLSILQQLETNDSKDIKEEKDMNNASGDMNQNSGSQNKYVRCLGIAHTRELAYQIKNEFDRFSKYLKNVRCEVVYGGISMNKHVVLFKGNNIPHIIIGTPGRILALIREKYMLTDKIQHFVLDECDKCLERLDMRGDVQKIFISTPLKKQVMFFSATMAKEMRDVCKKFLQNPVEIFIDDEAKLKLHGLLQHYVKLQEKDKTRKLIEILDALEFNQVIIFVKSVTRAITLDKLLTECNFPSISIHGGLNQEERIERYDKFKKFENRILVSTDLFGRGIDIERINIV…
PBANKA_1354500	A0A509AQH3	60S ribosomal protein L18-2, putative OS=Plasmodium berghei (strain Anka) OX=5823 GN=PBANKA_1354500 PE=3 SV=1	21.5	0	36897	53047	28290	29748	0	194038	80551	24325	150460	89220	10930	0	28236	3359986	0	2	0.636542	0.21449	0.857974	0.130336	5	35	5	28	MGIDLKNVGRIKKHGRKNLVSKNPYLRLLVKLYRFLARRTDVNFNKIIAKRLIMPKRFRPPLSLSKLQRHMSKKKNSVAVVVGSITDDNRLFSCRNIKVCALRFTETARKRIVDAGGECLTFDQLALRYPTGKNCILLRGPTKSRTAEKHFGSAPGRPKSKARPYVRSKGRKFEKARGRRKSRAYKK
PBANKA_1234200	A0A509ANV8	40S ribosomal protein S24 OS=Plasmodium berghei (strain Anka) OX=5823 GN=PBANKA_1234200 PE=3 SV=1	15.3	0	25323	85475	59655	47036	12616	320641	90330	62154	239695	181113	0	0	83867	4902213	0	2	0.721249	0.170091	0.851257	0.130279	4	43	4	34	MADQFTVRVKKYMSNPLLRRKQFALEILHPNKGTISKKDVKERLAKMYKLNNVNTIVLFGFKALFGGGRTKGFGLIYNSVDAVKKFEKKYRQIREGLITKENKPGRRAAKELKNRRKKVRGTAKTKVSGGKKK
PBANKA_0720300	A0A509AN29	Eukaryotic translation initiation factor 3 subunit M OS=Plasmodium berghei (strain Anka) OX=5823 GN=PBANKA_0720300 PE=3 SV=1	51.4	11984	29693	75418	73690	0	68373	366116	164861	78493	150690	197414	14918	0	82709	6420354	11158	3	0.583989	0.252833	0.873513	0.117359	20	84	20	46	MSVYIQLTHDLSGTVTAVTIGDWILGILKQKNIQEYEVFFKKFLNIYQNQDKESETNNRSEIFSLLLSASDCVFETLVETKKNKKINVIIDNKECVKSFNEFYKEVEEYFVILISILQLEFKSVDDLNNATNNFIKAIKNYNVFPELRLKILQLLYNSFNVNFSFRFPTFIAILQFSSQNNIFHAILPYIKSIDDWIKEWNISNHEKRQIYLIVAEELKKLKKYEDSYKHLKKHIYYFQKESKEILNHASTIKASVELVVDSINLNNNIFFHEIVNLDAIQNLQYIEEHKPIYELLTIFYKYNIQEFLTFKETYGNKFFTKYNIDLENSENKIYLLSIISLFKDNKVQNIQYISEQLNINMLKVEKILVSAIGSDIIDAKIDQINKTVHMKTTILRQFD…
PBANKA_1016300	A0A509AKT4	Proliferation-associated protein 2g4, putative OS=Plasmodium berghei (strain Anka) OX=5823 GN=PBANKA_1016300 PE=3 SV=1	42.7	0	0	140252	243666	0	0	197424	61019	41878	104786	81033	0	0	34017	3572872	0	2	0.901534	0.0634983	0.890323	0.100431	18	83	18	61	MELTTQNKTDEIDLEKYAFSGSIANLTLKKIIEKCIDGAKIYELCEFGDKFMKAELDKVFTKKEKGNKIEKGISFPVTINVNEVCNNYSPSADCDEIIKNGDIVKISLGCHIDGHISIVGHTIYVGNENESIEGSKAEILKNSHILAQLFLKSLKVGVYASDITKNIQKACNDLKCNVIPNCVTYQIKKYILEGSKFILLKENPENKVDDFQIQPDDIYIIDVMVTTGDGKIKESDYKTTIYKREVQRNYQLKTNLGRSFINEVNKNYPIFPFHLKFLDDQRASLIGIPEAMRHDLIKPYTVYTEKKKEYVSQFKYTVMVKEDGVKQFTGIKCPQINKCKTANTIQDEALKNILNSSGGKKKKDKLKNSEEATETAN
PBANKA_1033900	A0A509AK63	40S ribosomal protein S8 OS=Plasmodium berghei (strain Anka) OX=5823 GN=PBANKA_1033900 PE=3 SV=1	25	0	49575	95799	94267	25870	0	342290	93186	54388	166178	226621	0	0	52319	8199965	0	2	0.620347	0.216507	0.899361	0.0922214	9	65	8	50	MGISRDGRHKLRLTGGKKKIHKKKRKYELGRPPSNTKLGSRQVHVVRGRGRNYKYRAIKLDSGSFSWPAFGISKMTRIIDVVYNASNNELVRTKTLVKNCIVLIDSHPFTAWYENTFGVTLGKKKKSKEEGKDEENNEEQKEENNEGKDEKDKKSYSVIKKIGKAKQIDPALLEQFKQGRVLACISSRPGQCGKADGYIIEGDELLFYKRKMDKKKRN
PBANKA_1340400	A0A509AR16	L-lactate dehydrogenase OS=Plasmodium berghei (strain Anka) OX=5823 GN=PBANKA_1340400 PE=3 SV=1	36.9	51937	60598	216111	194316	83762	37282	586638	119746	287904	291251	283853	46285	30405	103161	9749495	0	3	0.420809	0.299492	0.906072	0.0868375	21	214	21	73	MISVKHPKISILGASDIGCTLAHMICEKNLGDVVLHDFRKDLSKGRALDILHTRPINRSKINILGTSDITDIKDSLVVVVTIEVSEREFAEFDEEDIEKQVYTSNVKLLKDVSKAIKKHCPHAFVVVTTNPVDCMAKVLQDYANIPSHKICGMAGVLHSARLRHNLAEKLRVNPGDVQGFVIGAHGDKMVPLPRYCCVNGIPLCDFTKKGAITEKEISKIVEKTKNTSLELLDLMPEGSVCFAPSSAIVEIIEAYLKDLKRVLVCSIHLNGQYGHKGVFAGVPVVIGGKGIEKVIELDLNTQEKELFDDSLKHISYLFDNYKHESAIEEEPKPN
PBANKA_1019400	A0A509AJI0	60S ribosomal protein L7a OS=Plasmodium berghei (strain Anka) OX=5823 GN=PBANKA_1019400 PE=3 SV=1	33.3	14134	93043	94864	32899	0	24394	462967	153082	98695	253206	352647	0	0	36256	7462936	0	2	0.577789	0.280205	0.904972	0.0828862	19	104	19	48	MAKDNKKQTKKPSKKTPAPCPLSNKKAVKKEIKKEKKNGIRMNPLIFERKRKTNIIGVGIRPKKDLSKYVKWPKHLRLQRKKKILLQRLKVPPAINQFNYTLSKNQTQDLMNFLKEYKPESKSEKKERLLKKAKDDLNKTQSKDKKPLMIKYGIKHITKLIERKNCSLVVIANDVTPIELVLFLPALCRMKDIPYCFVKNKSKLGKLVHKKMATAVCVQKVRKEDQDKLDYFCKLSREQFNDNADIRRKWGGQKMSKKSLILKKMKDKAKKLEEAKKKEISTKL
PBANKA_0611600	A0A509AGN9	Ribonucleoside-diphosphate reductase OS=Plasmodium berghei (strain Anka) OX=5823 GN=PBANKA_0611600 PE=3 SV=1	97	18572	21470	59326	157171	0	0	59383	30076	90113	78431	74112	0	0	18924	1694380	0	2	0.506636	0.321266	0.928609	0.0638785	20	86	20	32	MNDNIKRLPSSSEGDQLKKTDSGKIFDDGIKRTPSGKPIQTMYVLNRKGEEEDVSFDQILKRIQRLSYGLHELVDPARVTQGVINGMYSGIKTCELDELAAQTCAYMATTHPDFSILAARITTDNLHKSTNDDIGKVAEALYTYKDIRGRSASLISKEVYDFIMEHKDRLNKEIDYTRDFNYDYFGFKTLERSYLLRINNKIIERPQHLLMRVSIGIHIDDLEKALETYHLMSQKYFTHATPTLFNSGTPRPQMSSCFLLSMKSDSIEGIFETLKQCALISKTAGGIGVAVQDIRGQNSYIRGTNGISNGLVPMLRVFNDTARYVDQGGGKRKGSFAVYIEPWHSDIFEFLDLRKNHGKEELRARDLFYAIWVPDLFMKRVKENKNWTLMCPNECPGLS…
PBANKA_1106700	A0A509ALP7	60S ribosomal protein L4, putative OS=Plasmodium berghei (strain Anka) OX=5823 GN=PBANKA_1106700 PE=3 SV=1	46.1	0	80249	169501	188924	24374	64291	805868	250506	162107	469409	336033	18465	0	175291	17842258	0	2	0.615919	0.225236	0.934888	0.0594013	26	242	26	58	MATIRPLANVYSINGKKVVGEVEIPVVFQTPIRNDLIEYIFTNISKNTRHPYAVKLGAGYETSAESWGTGRAVARIPRVPGGGTHRAGQAAFGNMCRGGGMFNPTKIWRRWGRKVNLKEKRYAVCSSIAASGISSLVLARGHRISNLKEVPLVASNDIESIQKTKDALKFLISLGLRDEVNRLIKSKKIRAGKGKMRNRKYKISNGPLIIYNKDSGIKKAFRNIPGVDLCNVTKLNLLKLAPGGSIGRLCIWSEDAFKKLDVIYGKSFQKYVTKKHYILPKPIVNNADIYRIINSDQVQASLLDKKNPCKKRTQNKNSLTNFAVRCRLNPAYKLLRSLAVRRMKKSISENAKDKKEKKTKKKIEKKELQKVNNAYYNAIATSVKRKKQKEEKKAKSKKD…
PBANKA_1231700	A0A509AR54	60S ribosomal protein L2, putative OS=Plasmodium berghei (strain Anka) OX=5823 GN=PBANKA_1231700 PE=3 SV=1	27.9	15765	44368	116275	34605	30531	36187	436051	75416	46413	195256	229218	19161	0	48914	7913398	0	2	0.613722	0.195713	0.935957	0.0586539	10	77	10	43	MGRVIRGQRKGRGSIFKSHSHHRKGAAKLRHLDFCEKKGYIKGLVKDIIHDPGRGAPLAKILFKKTEKYGKKEELMVAAEGMFTGQYISCGTKAPLSVGNVLPIGKMPEGTLICNLEHMAGNRGTLVKASGCYATVVGQSEDGKKTKIRLPSGAKKTIDSRARAMVGVVGAGGRIDKPILKAGVAHHKYRVKRNCWPKVRGVAMNPVDHPHGGGNHQHIGHPSTVSRSAPAGQKVGLIAARRTGLLRGAKKTKLVGKSEN
PBANKA_1031900	A0A509AK44	protein-synthesizing GTPase OS=Plasmodium berghei (strain Anka) OX=5823 GN=PBANKA_1031900 PE=4 SV=1	51.2	12332	44681	87331	193784	15037	19453	462728	118466	143501	307201	173611	0	0	65716	7316629	0	2	0.782556	0.134753	0.937539	0.0540586	22	110	20	59	MIINEKDKLAEQNLETLDVTKLTPLSEDVISRQATINLGTIGHVAHGKSTLVHAISGVHTVRFKHEKERNITIKLGYANAKIYKCTNPDCPPPECYKSYESSKEDDPICPRENCNSKMKLLRHVSFVDCPGHDILMATMLNGAAVMDAALLLVAGNESCPQPQTSEHLAAVEIMRLKHILILQNKVELIKEEQALKQQEEIRNFVSGTAADSAPIIPISAVLKYNIDVVCEYIVTQISIPRRDFISSPHMIVIRSFDVNKPGEDIETLQGGVAGGSILHGVLKVGDQIEIRPGIISKDDKGEITCRPIISKILSMFAENNNLKYAVPGGLIGVGTRIDPILTRADRLVGQVIGHLNKLPDCFAEIEISYYLLRRLLGVKSQDGEKNTKVAKLKNGEFLM…
PBANKA_0310900	A0A509AF03	T-complex protein 1 subunit theta, putative OS=Plasmodium berghei (strain Anka) OX=5823 GN=PBANKA_0310900 PE=3 SV=1	60.8	0	0	130450	323325	16938	21778	318085	352787	87634	189958	144309	20484	0	54227	5403098	0	2	0.664649	0.22355	0.947391	0.0491252	38	279	38	74	MFANKLGVNALLKDGYRVVKNSEDAILKNIEACKEISSILQTSFGPKCMNKLIVNHINKKIVSSDCITILNDLEINHPVVNILKKLSETMNYEYGDNTNYVFTIATEMLEKASYLIHDGFNVNDILNGFKLGYNEIDKILEESISFKIENFYDEKEIFKVIKSAMGTKKLSNSYDFLINLLSKCLSTLMPEKIETFDVDNIRITKLNGGNLIDSQFLMGMVISKEPNGIVKKKENAQIMILNCGLEAATTETKGTVLLRNAQELVNFTKGEEDQMKKIIENIKQAGVDVIIVNGAISDIAQHFCDANDIMTLKITSKFETIRICKLLNIHSLVKLRTPEPEEIGKVSSIYVTEIASKKVTIINSKNKKLGTILLRGATTNLLDETERCIHDGINAIKNS…
PBANKA_1425100	A0A509AQD2	Importin subunit alpha OS=Plasmodium berghei (strain Anka) OX=5823 GN=PBANKA_1425100 PE=3 SV=1	61.1	0	20936	47396	151918	0	43782	200291	142005	52594	87517	73140	0	0	57072	3286412	0	2	0.966911	-0.0197231	0.957726	0.0388549	18	67	18	43	MDRRIEARRKEFKKNCDDTRRKREDLVVQIRKQQRECQLESKRAMVMANIGLEENNSYNINYVKSNQNDSTNDSLYNTSSNNSSNTLEMLKKIPSLAIGVRSSEYVTQLNSTKELRKLLSIEKGPPIQEVINSGVVPYIVEFLKYDDKTDLQFEAAWVLTNIASGSQEQTKVVIDNNAVPYLVRLLNSEKEDVCEQAVWALGNIAGDSAECREYVLNQNSLPLLLKILRSSHKRTLIRNAAWTLSNLCRGKPAPKFEIVSKALPTLAVLIYNDDEEILTDACWTLSYLSDGSNENINAVLDAGVAERVVELLSHGSFLVQTPALRTVGNIVTGDDLQTDVVVKLNAVQKLSCLLNSSKKSIKKEACWALSNITAGNISQIQAVIDNNVIPQLINILMKE…
PBANKA_0511900	A0A509AGK4	60S ribosomal protein L3, putative OS=Plasmodium berghei (strain Anka) OX=5823 GN=PBANKA_0511900 PE=3 SV=1	44.3	0	129541	190120	239292	0	66806	810269	267107	208774	445296	466540	38293	0	159582	12832253	0	2	0.413622	0.402371	0.959101	0.0376292	21	162	18	42	MSHRKFERPRHGSLGFLPRKRCKRLRGKIRSFPKDNKELAPHFTAFMGYKSGMSHIVREVDKPGSKLHKKEIVEACTIVECAPMVVVGMVGYRETPKGLKVLTAVWANHVSDEFRRRYYKNWYKSDKKAFTKCLNIPDTTKEKLYNRIEKYCTILRAICHTQPSKTPLRLKKAHIMEIQINGGHMKDKINFVKELLEKNIPVTNVFNTNEMIDVISVTKGHGTKGVVSRYGVKRLPRKTHRGLRKVACIGAWHPARVQFQVPRHGQKGYFHRTERNKKIYRIGLKKDKNNASTDADITEKKITPMGGFPHYGVVNEDFILLKGCISGTKKRPITLRKTLVPQVSRDALSQVSLKFIDTSSKLGHGRFQTSEEKIKYYGPLKKDLKA
PBANKA_0918000	Q8MZJ7	60S acidic ribosomal protein P0 OS=Plasmodium berghei (strain Anka) OX=5823 GN=PBANKA_0918000 PE=3 SV=1	34.8	0	63351	561938	357008	29063	33861	926907	255146	490688	466204	616444	53695	0	232269	19130481	0	2	0.3223	0.482344	0.962339	0.0345678	21	291	21	82	MAKLSKAQKKQIYMDKLSSLIQQYNKILIVHVDNVGSDQMASVRQSLRGKATILMGKNTRIRTALKKNLQAVPQIEKLLPLVKLNMGFVFCKDDLSEVRNIILQNKSPAPARLGVIAPIDVFIPPGPTGMDPSHTSFFQSLGISTKIVKGQIEIQENVHLIKQGEKVSASSATLLQKFNMKPFSYGVDVRTVYDDGVIYDAKVLDITEEDILEKFSKGVANVAALSRSVGIITEASYPHVFVEAFKNIVSLVIDTDYTFPLMKKIKDMVENPQAYAAAPVAASSAQKDEPEKEAAKKEEEEEEEEDGFMGFGMFD
PBANKA_1423300	A0A509AU86	DNA/RNA-binding protein Alba 1, putative OS=Plasmodium berghei (strain Anka) OX=5823 GN=PBANKA_1423300 PE=4 SV=1	26.9	58260	251345	380003	304278	62908	39968	2898344	69665	515734	1093106	1084857	135517	0	489727	78076497	0	2	0.190987	0.477839	0.97313	0.0248547	13	163	13	48	MKKDREPIDEDEMRITSTGRMTNYVNYGAKILGEEDKKSLKIKATGNAIGKAVTLAEIIKRRFKGLHQITKCGSTVIADQYVSGQDNSEHVIQEKTVSFIDILLSRDQLDVKDAGYQPPLDEKYVKEMSPEEIVNSRPFRGRSFRPRFFRGFRGGGRGGFMRRGGYKFFGDRMYDSRNGFRDGRGYGGSFGRGGGFRSGGGMGGNGRGGFRGFRDGRDGDYRSSRGGFRGGRNGFRGGRALS
PBANKA_0823100	A0A509AH44	S-adenosylmethionine synthase OS=Plasmodium berghei (strain Anka) OX=5823 GN=PBANKA_0823100 PE=3 SV=1	45.1	9490	33546	90154	249234	0	37692	291554	268721	58816	101840	52038	0	0	84667	4436371	0	2	0.641945	-0.230576	0.980998	0.0173824	18	86	18	52	MDQLKIKRGNFLFTSESVNEGHPDKVCDQISDAILDACLKEDPESKVACEVCAKKNFIFIFGEITTKAKVNYDQVTRNVLKHIGYDDEKKGLDYKNAEIKVFIDEQSPDIAQCVHENKQPELIGAGDQGIMFGYATDETENYMPLTHHYATLLGKRLTEVRKLGILPYLGPDGKTQITIEYKNKASGVYHMEPIRVHTVLISTQHSENVKYEQLKSDLMENVVKYVIPEKLLDKDTLYYLNPSGKFVLGGPAADAGLTGRKIICDTYGGWGAHGGGAFSGKDASKVDRSAAYYLRYIAKSLVANKFCRRVLVQASYSIGIANPVSLNVNSYGTVSTGYTDYDLEQIILRNFDLRPGFIIDELKLKEPIFSKTSAYGHFGRDDQSFTWEKVKDLTHEKNV…
PBANKA_1226500	A0A509AM51	Proteasome subunit beta OS=Plasmodium berghei (strain Anka) OX=5823 GN=PBANKA_1226500 PE=3 SV=1	29.8	14411	69740	193161	211156	0	32797	278401	82714	124684	208931	136927	0	0	55911	3728635	0	2	0.835315	0.111278	0.981078	0.0167398	12	61	12	56	MTLGPVVTGTSVIALKYRNGVMIAADKKASYGSYAKFQNVQRIFKISNKTVMSFSGELADAQYLHELLTRVNVNDVVEKKSKYDLHDTKFYHSYVSRLFYNRKNKIDPLFNNIIIAGLNSQEYDDNDKDILLYSEKQNNEEYKDIDKKDLYIGFVDMHGTQFCEDYITTGYARYFALTLLRNHYKDNMTEHEARSLLNECLKILYFRDTTASNKIQIVKITSKGVEYEEPYILNCDLNSRDYIYPSTMLPATGCMW
PBANKA_0610900	A0A509AH17	HSP40, subfamily A, putative OS=Plasmodium berghei (strain Anka) OX=5823 GN=PBANKA_0610900 PE=4 SV=1	48.4	0	56086	114922	186865	0	61958	553512	412717	75383	140277	121976	0	0	90504	10594680	0	2	0.930435	-0.0452734	0.995242	0.00438827	33	205	33	71	MFFSSGFPFDSMGGQQPRRKREVNNSKYYESLNLKKNCTIDEIKKAYRKLAIIHHPDKGGDPEKFKEISRAYEVLSDEEKRKLYDEYGEEGLEGGEQPTDATDLFDFILNAGKGKKKRGEDIVSEVKVTLEQLYNGATKKLAISKDVICTNCEGHGGPKDAKVDCKQCNGRGTKTYMRYHSSVLHQTEVTCNGCRGKGKIFNEKDKCVNCKGLCVLKTRKIIEVYIPKGAPNKHKIIFNGEADEKPNVITGNLVVILNEKPHTTFKREGVDLFMSYKISLYESLTGFIAEITHLDERKILIDCTNAGLIKHGDIREVLEEGMPTYKDPFKKGNLYITFEVEYPMDLVITKEKKEMLKILKKQNEVEKKYDIENTDCEVVTCKLVDKEYLKQRLTMQQQQ…
PBANKA_0818900	A0A509AJG0	Endoplasmic reticulum chaperone BIP OS=Plasmodium berghei (strain Anka) OX=5823 GN=BIP PE=1 SV=1	72.1	17519	102551	327310	357337	61891	77585	305574	245313	460584	524109	518950	82820	0	293913	5542799	29667	3	0.175563	0.559285	0.999318	0.00061547	37	402	35	55	MGNSKAFVLVLFVSLLKFISAVDPAIEGPIIGIDLGTTYSCVGVFKNGRVEILNNDLGNRITPSYVSFVDGERKVGEAAKLEATLHPTQTVFDVKRLIGRKFDDKEVAKDRTLLPYEIVNNEGKPNIRVQIKDKPTTFAPEQISAMVLEKMKEIAQSFLGKPVKNAVVTVPAYFNDAQRQATKDAGAIAGLNIVRIINEPTAAALAYGLDKKEETSILVYDLGGGTFDVSILVIDNGVFEVYATAGNTHLGGEDFDQRVMDYFIKMFKKKNNIDLRSDKRAIQKLRKEVEIAKRNLSVVHSTQIEIEDIIEGHNFSETLTRAKFEELNDDLFRETLEPVKKVLDDAKYEKSKIDEIVLVGGSTRIPKIQQIIKDFFNGKEPNRGINPDEAVAYGAAIQA…
PBANKA_1222900	A0A509AUF9	26S proteasome regulatory subunit RPN10, putative OS=Plasmodium berghei (strain Anka) OX=5823 GN=PBANKA_1222900 PE=4 SV=1	47.9	7605	0	54148	194069	0	24474	147735	202542	45826	63590	58409	0	0	41668	2208624	0	2	0.878454	-0.0796222	0.999974	2.38456e-05	10	44	10	34	MSNIEATIICIDNSDYNMNEDIVPNRFMSQIDCVNILCCNKTSMHYKNSIGVLVMAGDGIKVKVSLTNDIGQLLSCIHDIKIDGSCDLIRSLLIAQLALKHRVDKNLEQKIIIFIGSPIEVNEKQLINTGKQLKKNNISIDIISYGNINKNRDKLNKLFESTNNNGNCRIIECPENEENLSKYVLNKILNNNNFNMNNLDEDAQLLTAMELSMGASNNTTGVPNTLSNNNTQSDNNNINSRKNLNDLPTIQDIENMKDIDNELKEALLLSLREYNEKNKTDPENQNENNKINSELKNEGNGENLTIVNEEYKNIFDNEKTDLQTKQIGEKKENESYEKVFKICKDENIEDDNNKFQINPNIYINTENNTQNINKETNDDKNEFSIQDTNYISQILEKIP…
PBANKA_1117500	A0A509ANZ6	Ribosomal protein L27a, putative OS=Plasmodium berghei (strain Anka) OX=5823 GN=PBANKA_1117500 PE=3 SV=1	16.8	23481	33047	44329	29782	66117	34640	214303	62335	40692	72310	90073	0	7758	45364	1574115	0	3	0.536269	-0.272433	0.996785	-0.002752	5	28	5	34	MATRFKKNRKKRGHVSAGHGRIGKHRKHPGGRGKAGGMHHMRINFDKYHPGYFGKVGMRHLNLLKNRKYCRTINVDKLWGLLPEEKKKEFAKNENIAPVIDVTRVGYFKVLGNGHLEHNQPIVVKARYFSSMAEKKIKAVGGQCILVA
PBANKA_1016700	A0A509AKQ5	Leucine-rich repeat protein OS=Plasmodium berghei (strain Anka) OX=5823 GN=PBANKA_1016700 PE=3 SV=1	32.7	0	96227	443406	710176	0	0	194908	114559	78820	200599	139018	34503	0	35106	3767756	0	2	0.661646	0.249939	0.987614	-0.0116713	12	75	12	45	MEKAINERIEKWKKENTTDNKEVKNENAYESITELILDGKKFNTIKSEDIELLKNFKNLERLCLNQTGIQNLGSIPTMESLTVLELTDNHLSTVDILKHITTSFPNLKTLEIGGNHFKNIKDFETLKDLKQLTRLGVQFNPFSDDSNYRKELFEVLPNVKIIDCYNKDGVEVLSSDEEDEEEEYEEEDNTLKNFYEADFKEEDDEDEEFVPNDNEDEEDDELDDDLEEEEIDELNKEEDFDGETKDSENDPKEEKNNKRKQDSLENNDNEIDTKKTKVE
PBANKA_0930300	A0A509AIJ0	GTP-binding nuclear protein OS=Plasmodium berghei (strain Anka) OX=5823 GN=PBANKA_0930300 PE=3 SV=1	24.9	33901	91083	240306	370389	10739	12864	458539	132705	114799	224067	164585	43116	0	72329	10924496	0	2	0.680592	0.177918	0.975871	-0.0228345	17	161	14	78	MDNQEFIPQYKLILVGDGGVGKTTFVKRHLTGEFEKKYIPTLGVEVHPLKFQTNFGKTQFNVWDTAGQEKFGGLRDGYYIKSDCAIIMFDVSSRITYKNVPNWYRDITRVCETIPMVLVGNKVDVKDRQVKSRQIQFHRKRNLQYYDLSARSNYNFEKPFLWLARRLSNQPNLVFVGEHAKAPEFQIDLNIVREAEKELEQAAAVAIDEEDIEN
PBANKA_1426900	A0A509ARI9	ATP-dependent RNA helicase DBP1, putative OS=Plasmodium berghei (strain Anka) OX=5823 GN=PBANKA_1426900 PE=4 SV=1	104.2	17687	18481	23470	84233	0	0	123185	90661	22984	46249	50942	0	0	15078	4111757	0	2	0.907914	-0.0438703	0.96249	-0.0352788	37	122	37	56	MNYNNNISNGTFRKSEDDRNNYVRNNNYENNTNEDQGFSKKECIDIEESSNTQGYNHIRNKREVDNNMIPNVTNVSNARNVYDGNMENECYGINDNNNQNNRNIISDGRNRSGNNNANGNQENYKKKFGNKNFNNENGNQKNKVGMQNQQKKSGGLNHFMGNNLEKNKMRIGSISHNTISGNNSNDMNNEENIYKNNDNNNNSGANNNGNNNFKGDKLKYKPPMLRNQGGINRNNFNRMNYNKNSGNNGEGGGRGHFGFNNRHYNIPKTAWANRDNRRYYPEKEDEIYSNVKIEKGVNFELYDTIPVEIKGYNSDNIIPIESFTDSYLNLNELLLSNIKKVHYDKTTPIQKYSLSIIMNKHDLIGVAQTGSGKTAGYLLPIINHMLLNDPPKHTFYEDN…
PBANKA_1317400	A0A509APT3	HSP90 co-chaperone p23, putative OS=Plasmodium berghei (strain Anka) OX=5823 GN=PBANKA_1317400 PE=3 SV=1	28.1	40367	25598	558963	902689	0	0	422484	633273	158949	496012	171090	0	0	235018	7786556	0	2	0.980808	0.0133347	0.951639	-0.0434999	7	137	7	33	MPLFPIVLWAQKKECLYLTIELQDAEDVKIDLKEDSLYFYGIKEKNEYEFTLNFLKPINVEESKYTTKRNIKFKIIKKEKERWKSINNDGKKHWIKCDWNSWVDTDEEDKTTEYDDMAMNSFGGMGGLPDMSQFGGMGGMGGMGGMGGMGGLGGMGGMGGMGGMGDIDFSKLGNMGGDMSNLAGLGGMDQFKNMPNMNDDDSSSYGDDSSDDDDEDDDTNKSDADHSHACNDAKCNIDKDGAIHNDDAKVQEPVA
PBANKA_0513600	A0A509ALD0	Adenosine deaminase OS=Plasmodium berghei (strain Anka) OX=5823 GN=ADA PE=1 SV=1	42	0	33829	246124	437755	0	23649	146941	163330	93978	272690	228220	0	0	31012	2721927	0	2	0.816538	0.135685	0.923529	-0.0655115	24	150	24	68	MEIPNEEIKFLKKEDIKNINLNGMNKKERYEIWKKIPKVELHCHLDLTFSGKFFLKWVRKYNLQPNMTDDQVLDHYLFTKEGKSLAEFIRKAISVSDIYRDYDILEDLAKWAVIEKYKEGVVLMEFRYSPTFVSSSHGLDIELIHKAFVKGIKNATEMLNNKIYVALICISDTGHSAASIKHSGDFAIKHKHDFVGFDHGGREIDLKDHKDVYHSVRNHGLHLTVHAGEDATLPNLNTLYTAINILNVERIGHGIRVSESEELIELVKKNNILLEVCPISNLLLNNVKSMDTHPIRKLFDAGVKVSVNSDDPGMFLTDINDNYEKLYIHLNFTLEEFMTMNNWALEKSFVNDDIKSKLKTMYF
PBANKA_1218200	A0A509ANN1	T-complex protein 1 subunit epsilon OS=Plasmodium berghei (strain Anka) OX=5823 GN=PBANKA_1218200 PE=3 SV=1	59.1	0	65109	115187	237361	0	64694	266764	391340	75160	179989	204793	24527	0	88238	5475164	0	2	0.760626	0.146011	0.9241	-0.0710248	33	308	32	69	MNIAIDEYGQPFVILREEEKKRIKGIEAHKSNILAAKVVADILKSSIGPRGMDKIIVSEDNNVTVTNDGATILEKIDVQHECAKLLVELSKSQDNEIGDGTTGVVIIAGFLLEEAYALIDKGIHPLRIADGFENACNIALKAIEDIAITVDIEKNNHEILKKLSNTSLSSKIVSSKKDLLSNIVVDAVLSVADMKRKDVRFDLIKIEGKPGGLLEESTLIKGIVLNKEISHSQMCKEVKNAKIAILTCPFEPPKPKIKHKLNITNAEAYRDLQAIEKKYFYDMVDALKKAGANFVICQWGFDDEANYLLLKENIPAIRWVGGVEMELIAIATGGKIIPRFEDIHESKLGRADLIREISHGTVNNPMVYIEGCSNTKAITILLRGGNQMMIDECERSVHD…
PBANKA_1303800	A0A509AR74	Triosephosphate isomerase OS=Plasmodium berghei (strain Anka) OX=5823 GN=PBANKA_1303800 PE=3 SV=1	27.8	0	74359	130554	324662	0	33998	278247	88864	98361	143577	118111	0	0	12792	9980374	0	2	0.834215	0.100541	0.920009	-0.0740972	22	150	22	83	MARKYFVSANWKCNGTEYSIKSLADSFNTVDFDPSKLDVVVFPVSVHYDLTRKLLNKKIGTGIQNVSKFGNGSYTGEVSAEIAKNLNIEYVLIGHFERRKYFHETDEDVRQKLQQAIKNNLKAVVCFGESLEQRESNKTIDVITKQVKAFVDLIENFDNVILAYEPIWAIGTGKTATPEQAQEVHKEIRKIVKEICGEAQANKIRILYGGSVSVENCTSLIKQEDIDGFLVGTSSLKTSFTEIIKSAM
PBANKA_1036600	A0A509ANG0	Ribonucleoside-diphosphate reductase small chain, putative OS=Plasmodium berghei (strain Anka) OX=5823 GN=PBANKA_1036600 PE=3 SV=1	40.5	27241	0	102417	273866	17415	41040	84319	153318	57287	123334	308826	0	0	48024	2426893	0	2	0.923713	0.0489955	0.8661	-0.114574	13	72	13	49	MAEVMNISKSASFSKQEKEFSDFQKTKESNEKILNKESNRFTLHPIIYPEVWNFYKKAEASFWTAEEIDLSSDLKDFEKLNVNEKHFIKHVLAFFAASDGIVLENLASKFLREVEIIEAKKFYSFQIAVENIHSETYSLLIDNYIKDEKERLNLFHAIENIPAIKNKALWAAKWINDTNSFAERIVANACVEGILFSGSFCAIFWFKKQNKLHGLTFSNELISRDEGLHTDFNCLIYSLLENKLPEEVVQNIVKEAVEVERSFICESLPCDLIGMNSRLMSQYIEFVADRLLECLGCSKVFHSKNPFNWMDLISLQGKTNFFEKRVADYQKSGVMAQRKEQVFSLNTDF
PBANKA_0107400	A0A509AGT3	Ornithine aminotransferase OS=Plasmodium berghei (strain Anka) OX=5823 GN=PBANKA_0107400 PE=3 SV=1	46.3	20217	52464	138482	339539	0	67772	465925	370966	39737	168923	192429	0	0	66385	5472416	12038	3	0.54809	-0.307449	0.869371	-0.115366	22	205	22	56	MEFVKDLKTPEDYINNELKYGAHNYDPIPVVLKRAKGVFVYDVNDKKYYDFLSAYSSVNQGHCHPNILNAMINQAKNLTICSRAFFSVSLGICERYLSNLLGYDKVLMMNTGAEANETAYKLCRKWGYEVKKIPENMAKIVVCKNNFSGRTLGCISASTTIKCTYNFGPFAPQFSKVPYDDLEALEEELKDPNVCAFIVEPIQGEAGVIVPSDNYFQGVYDICKKYNVLFVADEIQTGLGRTGKLLCVHHYNVKPDVILLGKALSGGHYPISAVLANDNVMLVIKPGEHGSTYGGNPLAASICVEALNVLINEKLCENSEKLGGPFLENLKRKLKDSKIVRDIRGKGLLCAIEFKNELVNVLDICLKLKENGLITRDVHDKTIRLTPPLCITKEQLDEC…
PBANKA_0107300	A0A509AAP0	T-complex protein 1 subunit zeta, putative OS=Plasmodium berghei (strain Anka) OX=5823 GN=PBANKA_0107300 PE=3 SV=1	61.4	22425	90824	109797	70753	26129	84580	76472	235522	53668	167789	152478	0	0	74933	6632462	0	2	0.642151	-0.180531	0.867356	-0.116824	30	214	30	64	MSVHMLNKKADSLRSTNVLLTNINASKGMYEIIKSNLGPKGSYKMLVSASGAIKITKDGNVLLNEMMIQHPTATMLGRICSSIDENLGDGSSSNLIITTGLIYLSEKYILYENIHPRIITQGFDTIKNILFDLLNTMKIPINMENHFNKEILYNVAKTCVRTKLPIQLADKLSEDLVDSIQIVYNKNKQIDLHMIEIMDIKRNMSINTKLVRGMVLDHGCRHPNMPNRLTKCFILVLNTSLEYEKSEVFSSFVYSNAEDRDKLVESERKFTDDKIKKIIEIKKNIIEKKFKETGEMYNFAVFNQKGIDPMSLDLLAKENIMALRRIKRRNLERIVLCCGGNPCNNVYDIVDDDIGYAGLVYEICVNDEKYTFIEDVLNPKSCTIFIQAPNDYTIKQIKD…
PBANKA_1026200	A0A509AN28	Glutamate dehydrogenase OS=Plasmodium berghei (strain Anka) OX=5823 GN=PBANKA_1026200 PE=3 SV=1	52.9	0	41894	215868	560090	0	46056	321679	339371	0	171940	64765	0	0	81712	3460973	0	2	0.396746	-0.482229	0.859554	-0.123747	24	192	24	65	MTQCRDSTGRFLLVDKKAPNYENIINKEMNEVYERVKKIDPNQSEFLQAFHEILYSLKPLFMEEPKYLPIIEMLSEPERLVQFRVCWIDDNGIQRKNRGFRVQFNSTLGIYKGGLRFHPSVNLSIVKFLGFEQIFKNSLTGLSMGGAKGGSDFDPKGKSDNEIMKFCQSFMNELYRHIGPRTDVPAGDIGVGGREIGYLFGQYKKIANCFNGTLTGKNEKWGGSILRTEATGYGLVYFVLEVLKSLNIQMDKQTAIVSGSGNVALYCVQKLLQLNVKVLTMSDSNGYIYEPNGFTNDDLNFIIELKEVRKGRIEEYLNHSSTAKYFPKEKPWNVKCTLAFPCATQNEIDLDDAKLLHKNGCILVGEGANMPSTIEAINYLKENKIILCPSKAANAGGVA…
PBANKA_0604300	A0A509AJD4	Tetratricopeptide repeat protein, putative OS=Plasmodium berghei (strain Anka) OX=5823 GN=PBANKA_0604300 PE=3 SV=1	38.8	32467	34737	304213	761420	24579	33382	231378	378361	278785	283867	179037	38649	0	360951	7845596	0	2	0.664242	0.176063	0.849862	-0.141308	26	190	26	70	MTEEEMIVETGSNTESEFDEQAELLEKKTAQELFDMGNLEFKESKNYDVAAERFSMAVEKKVKELNVEDSLHPDLREYYLCFADALLTKEEEKNDLFEFLKKKKSVEATEDEDCSNKEEVTDEQLAFEMFEFSRKCYEMLLEQKKELSQKDLLNYSYVFIRLGDISLLNHFFEEALKEYEKCVNLREEHKLGDENLIAPLISLSQSYMFCGKRKEAVEYFEKVKKILLDVRQKTTPLPKNTNEKIIRDTYEDVQIQINDLKRQIEEEGEEGKEKGSQTIAKELVITTKSEFDKAVLNKDINEVKKIKISNIEADEHANKKRRINLSNYKN
PBANKA_1331900	A0A509AS99	RNA helicase OS=Plasmodium berghei (strain Anka) OX=5823 GN=PBANKA_1331900 PE=3 SV=1	45.3	213884	480181	948564	1214266	84698	339182	1465168	947628	576426	758877	581510	195318	66640	485166	20494705	41669	4	0.884467	-0.0555604	0.835942	-0.156321	33	373	32	84	MSTKDEKFNNENDIEGNTEEIVDTFDALGLNEKLLRGIYSYGFEKPSAIQQRGIKPILKGYDTIGQAQSGTGKTATFVISSLQLINYDYVACQALILAPTRELAQQIQKVVLALGDYLKVKCHACVGGTVVREDIDKLKQGVHMVVGTPGRVYDMIDKRHLGVDRLKLFILDEADEMLSRGFKAQIYEVFKKLVPDIQVALFSATMPQEILELTTRFMRDPKTILVKKDELTLEGIRQFYVAVEKEEWKLDTLCDLYETLTITQSIIYCNTRKKVDILTQEMHNRLFTVSCMHGDMDQKDRDLIMREFRSGSTRVLVTTDLLARGIDVQQVSLVINYDLPCSPDTYIHRIGRSGRFGRKGVAINFVTNDDKEKDKLKKIESYYSTQIEEMPLEVADYL
PBANKA_0712600	A0A509AIM7	14-3-3 protein OS=Plasmodium berghei (strain Anka) OX=5823 GN=PBANKA_0712600 PE=3 SV=1	30.2	140414	451450	545321	1200322	36979	205370	956181	340788	650345	709893	575019	152430	89103	174348	24639517	0	3	0.592589	0.200781	0.83361	-0.157415	22	287	20	76	MATPEELKQLRSDCTYRSKLAEQAERYDEMADAMRTLVEQCVNNDKDELTVEERNLLSVAYKNAVGARRASWRIISSVEQKEMSKANVHNKNVAATYRKKVEEELNSICQDILNLLTKKLIPNTSESESKVFYYKMKGDYYRYISEFSCDEGKKEASNFAQEAYQKATDIAENELPSTHPIRLGLALNYSVFFYEILNQPHQACEMAKRAFDDAITEFDNVSEDSYKDSTLIMQLLRDNLTLWTSDLQGDQTEEKSKDEGLE
PBANKA_1441100	A0A509AUW8	Haloacid dehalogenase-like hydrolase, putative OS=Plasmodium berghei (strain Anka) OX=5823 GN=PBANKA_1441100 PE=4 SV=1	32.8	15309	90209	144216	272190	0	25850	203258	103449	181995	191690	94117	10837	0	86881	3455140	0	2	0.728479	0.1657	0.824921	-0.160501	15	105	15	59	MSKSVEETLKGADIKLLLIDFDGTLFVDKDIKVPKENIEAIKEAIEKGYMVSICTGRSKVGILSAFGEENLKTMNFYGMPGVYINGTIVYDQIGYTLLDETIQTDVYAELINYLVEKNLVNQTIFHRGESNYVTEDNKYADFLQKNYSENRSIIIRHNELLKYKTMNKLMIVLDPSESKQVIDNLKKKFSKKLTIFTTYNGHAEVTKLGHDKFTGINYLLKHYNISNDQVLVVGDAENDIAMLSNFKYSFVVANATDSAKYHAKCILPLTHKEGAVAYLLKKVFELKK
PBANKA_1008800	A0A509AJH9	Glucose-6-phosphate isomerase OS=Plasmodium berghei (strain Anka) OX=5823 GN=PBANKA_1008800 PE=3 SV=1	68	12031	8186	92187	215631	0	13046	160077	204796	121026	144779	95562	24812	0	14356	1788268	0	2	0.39425	0.438754	0.809911	-0.176176	18	69	18	46	MDITSLKSYKDLIELSNEEKKKDLKDYLEDKKRSELLIKKFKNLYVDLSRQRYNEKTLNKLIEYAKEIKLGEKIARTFKGEKVNITENRSVLHTALRIPIEKINTHKIIIDDKNVLEDVHNVLKKIENYSENIRNGNIKTCRNKKFKNVICIGIGGSYLGTQFVYEAMKYYYTNEVICKNKADNSSLNNNTLGNETFSIAYDEEKNFNLIFLANVDPNDINRTIQNIDQTETLVIIISKTFTTAETMLNARTIKNWLKLKIKDENDLSKHMVAISTNLKLTDEFGITRENVFEFWDWVGGRFSVTSAVGMLPLSIAFGFKNMTKFLNGCHDVDEHFLNTEYSKNIPVLLALTSFYNNQFFDNKNIAILPYFQNLLKFSKHVQQLAMESNGKSVDRNNKF…
PBANKA_1326400	A0A509AQ04	Glyceraldehyde-3-phosphate dehydrogenase OS=Plasmodium berghei (strain Anka) OX=5823 GN=PBANKA_1326400 PE=3 SV=1	36.6	441373	897231	4231188	4194206	649827	1108663	4635924	2364242	2904332	3667080	2732737	569461	145527	2032439	56165323	115021	4	0.727089	0.133003	0.759277	-0.226296	32	965	31	90	MAITKVGINGFGRIGRLVFRSAQERSDIEVVAINDPFMDISHLIYLLKHDSVHGKFPCEVTPTEGGIMVGNKKVVVYNERDPAQIPWGKHAIDVVCESTGVFLTKELSNAHIKGGAKKVIMSAPPKDDTPIYVMGINHEKYNSSQTIVSNASCTTNCLAPIAKVIHENFGIVEGLMTTVHASTANQLVVDGPSKGGKDWRAGRSALLNIIPASTGAAKAVGKVLPELNGKLTGVAFRVPIGTVSVVDLVCRLEKPAKYEDVAKKIKEASEGPLKGILGYTEEEVVSQDFVHDSRSSIFDLKAGLALNDNFFKIVSWYDNEWGYSNRLLDLAIHITKN
PBANKA_1141700	A0A509AL81	Ubiquitin-60S ribosomal protein L40, putative OS=Plasmodium berghei (strain Anka) OX=5823 GN=PBANKA_1141700 PE=3 SV=1	14.6	177882	279539	582965	1763457	108497	259943	819066	901286	510928	502747	610362	163804	10074	528362	18394877	72712	4	0.91093	-0.0373682	0.753117	-0.237747	6	169	1	37	MQIFVKTLTGKTITLDVEPSDTIENVKAKIQDKEGIPPDQQRLIFAGKQLEDGRTLSDYNIQKESTLHLVLRLRGGAIEPSLAQLAQKYNCQKLICRKCYARLHPRATNCRNKKCGRTNQLRPKKKLK
PBANKA_1362900	A0A509AT80	Lysine--tRNA ligase OS=Plasmodium berghei (strain Anka) OX=5823 GN=PBANKA_1362900 PE=3 SV=1	67.1	0	72594	317315	504617	17329	129530	481268	597038	164112	195626	311568	0	0	65575	5493364	0	2	0.932155	-0.0462566	0.729148	-0.250468	32	239	32	60	MLTLFLSILKNKNFNRQFFFNNKFLTLFEHNFKANIIKVHFTTMTEKREHVTSNQKKTNPPPVDASKEDETELDPRLYYENRSKLILNQQEKGINTYPHKFERTISIPDFIEKYKNLENGEHLEQTILNITGRIMRVSSSGQKLRFFDLVGDGKRIQVLANYSFHDKEKSNFVECYDKIKRGDIVGIIGFPGKSKKGELSIFPKETILLSPCLHMLPMKYGLKDTEIRYRQRYLDLLINESTRNVFITRTKIINFLRNFLNDQGFMEVETPSMNLMAGGASARPFITHHNDLDLDLYLRIATELPLKMLIVGGLDKVYEIGKVFRNEGIDNTHNPEFTSCEFYWAYADYYDLIKWSENFFSKLVYHLFGSYKILYNKDGPEKDPIEIDFTPPYPKISLV…
PBANKA_1459300	Q4Z1L3	Actin-1 OS=Plasmodium berghei (strain Anka) OX=5823 GN=ACT1 PE=1 SV=2	41.9	185607	483639	1121792	1694206	305916	393286	1031343	956309	753889	1109890	957711	188522	151929	873067	11156538	24823	4	0.97545	0.011234	0.730491	-0.253798	28	520	25	75	MGDEEVQALVIDNGSGNVKAGVAGDDAPRSVFPSIVGRPKNPGIMVGMEEKDAFVGDEAQTKRGILTLKYPIEHGIVTNWDDMEKIWHHTFYNELRAAPEEHPVLLTEAPLNPKGNRERMTQIMFESFNVPAMYVAIQAVLSLYSSGRTTGIVLDSGDGVSHTVPIYEGYALPHAIMRLDLAGRDLTEYLMKILHERGYGFSTSAEKEIVRDIKEKLCYIALNFDEEMKTSEQSSDIEKSYELPDGNIITVGNERFRCPEALFQPSFLGKEAAGIHTTTFNSIKKCDVDIRKDLYGNIVLSGGTTMYEGIGERLTRDITTLAPSTMKIKVVAPPERKYSVWIGGSILSSLSTFQQMWITKEEYDESGPSIVHRKCF
PBANKA_1308600	A0A509APH7	Fructose-bisphosphate aldolase OS=Plasmodium berghei (strain Anka) OX=5823 GN=PBANKA_1308600 PE=3 SV=1	39.8	878869	1025880	3164171	4903553	592824	1025437	3674076	3127156	2473775	3838908	2847424	554803	213193	1706280	49740424	123851	4	0.839963	0.0744862	0.718289	-0.264953	29	900	29	72	MVGCAEYKNAPMKLPKEVAQELAETAKKLVAAGKGILAADESTQTIKKRFDNIKIENTVENRASYRDLLFGTKGLGKFISGAILFEETLFQKNEAGVPLVNLLHDEGIIPGIKVDKGLVSIPCTDDEKSTQGLDGLAERCKEYYKAGARFAKWRAVLVIDPAKGKPTDLSIQEVSWGLARYASICQQNKLVPIVEPEILADGAHTIEVCATVTQKVLASVFKALHDNGVLLEGALLKPNMVTAGYDCTEKTKTDDIGFFTVRTLRRTVPPALPGVVFLSGGQSEEDASINLNSINVLGPHPWALTFSYGRALQASVLNTWQGKKENVAKARAVLLQRAEANSLATYGKYKGGAGGSTAGASLYEKKYVY
PBANKA_1242300	A0A509AV96	Hsc70-interacting protein, putative OS=Plasmodium berghei (strain Anka) OX=5823 GN=PBANKA_1242300 PE=4 SV=1	47.7	0	114175	377507	400448	21253	113265	394140	730019	121576	358677	289354	0	0	43688	8767800	0	2	0.779407	-0.155185	0.696658	-0.269521	17	144	17	40	MDIEKIEDLKKFVASCEENPSILLKPELSFFKDFIESFGGKIKKDKMGYEKMKSEDSTEEKSDEEEEDEEEEEEEEEDDDPEKLELIKEEAVECPPLAPIIEGELSEEQIEEICKLKEEAVDLVENKKYEEALEKYNKIISFGNPSAMIYTKRASILLNLKRPKACIRDCTEALNLNVDSANAYKIRAKAYRYLGKWEFAHADMEQGQKIDYDENLWDMQKLIQEKYKKIYEKRRYKINKEEEKQRLKREKELKKKLAAKKKAEKMYKENNKRENYDSDSSDSSYSEPDFSGDFPGGMPGGMPGMPGGMGGMGGMPGMPGGFPGMPGGMPGGMPGGMGGMPGMPGGMPGGMGGMPGMPGGMPDLNSPEMKELFNNPQFFQMMQNMMSNPDLINKYASDP…
PBANKA_1133300	A0A077XDU3	Elongation factor 1-alpha OS=Plasmodium berghei (strain Anka) OX=5823 GN=PBANKA_1133300 PE=3 SV=1	48.9	1296931	3109815	6332327	9688303	1191037	2819638	9298256	8871819	4057496	7055441	6577258	1767936	541416	3203032	105139082	318759	4	0.905478	0.0443041	0.710298	-0.277677	55	2028	50	86	MGKEKTHINLVVIGHVDSGKSTTTGHIIYKLGGIDRRTIEKFEKESAEMGKGSFKYAWVLDKLKAERERGITIDIALWKFETPRYFFTVIDAPGHKDFIKNMITGTSQADVALLVVPAEVGGFEGAFSKEGQTKEHALLAFTLGVKQIVVGVNKMDTVKYSEDRYEEIKKEVKDYLKKVGYQADKVDFIPISGFEGDNLIEKSDKTPWYKGRTLIEALDTMEPPKRPYDKPLRIPLQGVYKIGGIGTVPVGRVETGILKAGMVLNFAPSAVVSECKSVEMHKEVLEEARPGDNIGFNVKNVSVKEIKRGYVASDTKNEPAKGCSKFTAQVIILNHPGEIKNGYTPVLDCHTSHISCKFLNIDSKIDKRSGKVVEENPKAIKSGDSALVTLEPKKPMVVE…
PBANKA_1003800	A0A509AJD5	Vacuolar proton pump subunit B OS=Plasmodium berghei (strain Anka) OX=5823 GN=PBANKA_1003800 PE=3 SV=1	55.8	20573	32169	127096	268454	23793	73622	248936	333268	92650	135394	182018	25760	0	67820	3213842	0	2	0.992117	0.0041493	0.702151	-0.283917	19	114	18	59	MSKEVIHTKVEASRVNALAAVRNYKVCPRLEYKTISGVQGPLVIIEDVKFPKYSEIVTIHLSDNTSRQGQILEVCGKKAVIQVFEGTSGIDNKNSYVEVSGDILKMPMSDEMLGRVFNGSGKPIDKGPNILADDYLDINGNPINPQCRVYPKEMIQTGISTIDVMNSIVRGQKIPLFSAAGLPHNEIGAQICRQASLVQGKDVLDHSDENFAVIFGAMGVNMETARYFRQDFEENGKMERVCLFLNLANDPTIERILTPRIALTTAEYLAFEKEMHVFVILTDMSSYADALREVSSAREEVPGRRGYPGYMYSDLSTIYERAGRVEGRNGSITQFPILTMPNDDITHPIPDLTGYITEGQIFVDRNLYNRQIYPPINVLPSLSRLMKSGIGKNMTRIDH…
PBANKA_0703900	A0A509AJK0	Receptor for activated c kinase, putative OS=Plasmodium berghei (strain Anka) OX=5823 GN=PBANKA_0703900 PE=3 SV=1	35.6	84930	167887	483796	418839	35710	142894	788735	378594	399254	598337	477005	47373	0	288037	13053342	14423	3	0.727243	0.128355	0.689882	-0.291202	16	191	16	72	MDNIKEAQVILKGVLEGGHSDWVTSVSTPTDAKLKTVVSASRDKKLIVWNINPDDESGEIGTAKKSLTGHSQAISDVSISSDGLFALSGSWDNSIRLWDLSLGETIRSFIGHTSDVFSVSFSPDNRQIVSASRDKTIKLWNTLAQCKYTITEQQHTDWITCVRFSPSPKQAIIVSCGWDKLVKVWNLKNCDLNKNLEAHTGVLNTVTISPDGSLCASGGKDGVAKLWDVNEGKHLYSLETGCTINSLCFSPCDYWLCAATDRFIRIWNLESKLIIAEIYPVKQYKVGLPWCTSITWSANGQFLFCGSTDGNVYVYEIKKQAI
PBANKA_1210800	A0A509AN79	Hypoxanthine phosphoribosyltransferase OS=Plasmodium berghei (strain Anka) OX=5823 GN=PBANKA_1210800 PE=3 SV=1	26.5	17443	91868	529639	692208	41400	117797	1156307	458131	208305	331562	318758	15903	6717	160224	27604896	0	3	0.735413	-0.141011	0.684746	-0.297351	18	210	18	82	MKIPNNPGAGELGYEPVMIKDDDGYEFDSFVTPDHYKNYLKRILIPNGLIKSRVERMAFDISRTYNGEEFHLLCLLKGSRSFFTSLLKYLDRIHNYYIADASTNSYREHYVRVKSYCNTQSTGRLEIVSEDLSCLKGKNVLIVEDIIDTGNTLSKFCDYLKKFEPKTIAVSALYIKRTPLWNGFKADFTGFSVPNFFLVGCGLDYNENFRDLNHVCIISEEGIKTFMQSSS
PBANKA_0210200	A0A509ACL7	aspartate--tRNA ligase OS=Plasmodium berghei (strain Anka) OX=5823 GN=PBANKA_0210200 PE=3 SV=1	81.2	14567	32873	72804	176427	0	32758	88898	156267	25862	59414	44903	0	0	19138	1031859	0	2	0.472663	-0.368586	0.677057	-0.299171	10	37	10	17	MGNMNKRFITQLNKINDIKKNIFIVRKENKKVINSFFSVKEKQRFLPLAKLNKNKNFGKFSYLSFLSEFKKLKNFYVYTKIKKTRYIRKDCLNNRDNNNSNKNFEQTYNEMESEQMNNNGNIIPDEISDKKKEKKAKKLEEKKLKLAKKLERENLKNEAAKVLEHVCEDINKESYGYVKLSIIMENGKNIHLYNPEEIYNLLYVKNDINLEKNVDRNEKREDIESEMNNKNNKLEEGSCLWVRGRIHDIRSKGSLAFIILRNKIYSLQCILDIKNVNNDKNMIKWVNNLSLESIVDIYGKLVKPEISIDSTIIKYEIHILKIFCISKNSKELPFLLKDANMKEIDDEATIRVNQDNRLNNRCIDLRTYANYSIFYLQSEICKIFRNYLIDNNFTEIHTP…
PBANKA_0417700	A0A509AIG6	Tubulin alpha chain OS=Plasmodium berghei (strain Anka) OX=5823 GN=PBANKA_0417700 PE=3 SV=1	50.2	22575	46530	104378	251353	24827	34702	212168	99126	90937	123380	66020	17464	0	62360	3818636	0	2	0.812346	-0.0816358	0.686219	-0.301002	22	662	4	58	MREVISIHVGQAGIQVGNACWELFCLEHGIQPDGQMPPDQAGRANDDAFNTFFSETGAGKHVPRCVFVDLEPTVVDEVRTGTYRQLFHPEQLISGKEDAANNFARGHYTIGKEVIDVCLDRIRKLADNCTGLQGFLMFSAVGGGTGSGFGCLMLERLSVDYGKKSKLNFCCWPSPQVSTAVVEPYNSVLSTHSLLEHTDVAIMLDNEAIYDICKKNLDIERPTYTNLNRLIAQVISSLTASLRFDGALNVDVTEFQTNLVPYPRIHFMLSSYAPVVSAEKAYHEQLSVSEITNSAFEPANMMAKCDPRHGKYMACCLMYRGDVVPKDVNAAVATIKTKRTIQFVDWCPTGFKCGINYQPPTVVPGGDLAKVMRAVCMISNSTAIAEVFSRMDQKFDLMY…
PBANKA_1118600	A0A509AKL5	Cell division cycle protein 48 homologue, putative OS=Plasmodium berghei (strain Anka) OX=5823 GN=PBANKA_1118600 PE=4 SV=1	90.8	19149	81714	81764	389364	0	42994	190552	210668	43892	83972	0	0	0	22167	2701220	0	2	0.299732	-0.52401	0.671654	-0.30196	38	183	37	63	MENNPDIKTLGDDNNGKIPKKKNLCRLIVEEATNDDNSVVALNTKRMEELNFFRGDTILIKGKKRHSTICIILNDNDLDEGKIRINKVARKNLRVCLGDIVYVKACPEIPYGKKIQVLPIDDTIEGLAKDTLFEIFLKPYFNESYRPVKKGDLFLVRGGFMSVEFKVVEVDPDDFCIVSPDTVIYYEGDPIKRDDEEKLDEIGYDDIGGCKKQLAQIREMIELPLRHPGLFKTLGVKPPRGVLLYGPPGSGKTCIARAVANETGAFFFLINGPEVMSKMAGEAEANLRRAFEEAEKNSPAIIFIDEIDSIAPKREKTNGEVERRVVSQLLTLMDGIKSRGQVVVIAATNRQNSIDPALRRFGRFDREIDIGVPDDNGRFEILRIHTKNMKLSPDVKLEE…
PBANKA_1444100	A0A509AV09	T-complex protein 1 subunit gamma OS=Plasmodium berghei (strain Anka) OX=5823 GN=PBANKA_1444100 PE=3 SV=1	60.8	27605	0	271320	532651	26935	96062	575136	487532	88337	261183	195204	0	0	88136	6934615	0	2	0.6158	-0.248148	0.639948	-0.329874	40	299	39	70	MMKNPGTVLVFKPNTKREEGRKTQLSNIQASRAVSEIVKTTLGPMAMLKMMLDPLGGIVITNDGNCILREVDVAHPAAKSLIELSRSQDEEVGDGTTSVVILSGELLSIAEVFLKDKIHPTVIVNCYMTALNLSLKYLEEIAIEVDVNNEDNLLKAIDSCLSTKFVNRYNKIVSKLSLEATQCVKVENMIGKKEIDIKRYAKVEKIPGGDIMDSYVLKGVMINKDITHPKMRRYIKNPRILLLDCTLEYKKAESQTNVEILDENTWNQLLLQEEIEVKKMCEYIIDSRCDIVVTEKGVSDLAQHFLVKKNISVIRRVRKTDLNRLERITGATIVNRCDEIVEKDIGTKCGLFEIKKIGDDYYSFFVECENPRACTILLRGATKDVLNEIERNLHDGMNV…
PBANKA_0919300	A0A509AM11	Spermidine synthase, putative OS=Plasmodium berghei (strain Anka) OX=5823 GN=PBANKA_0919300 PE=3 SV=1	36.6	6376	17176	93141	102529	0	26321	38833	43914	22782	58112	0	0	0	25494	157107	0	2	0.652476	-0.257799	0.643805	-0.331791	3	20	3	12	MDKLMTNNKVALSIVLVGGLCSLALYQMKKKFNFAHFLFSKKWFSEFSIMWPGQAFSLEIKKIIYQGKSKYQNVIVFDSTTYGRVLILDGVIQLTEKDECAYHEMMTHIPMNVGKEAKNVLVVGGGDGGIIRELCKYKYIENIDICEIDEMVIEVSKKYFKDISCGYEDKRVNVFIEDASKFLENVTNTYDVIIVDSSDPIGPAESLFNQNFYEKLYNALKPNGYCVSQCESMWIHVGTIKNMIGYAKKLFKKVEYANISIPTYPCGCIGLLCCSKTDTDMSKPNKKLESKEFANLKYYSYENHSAAFKLPAFVLKEIENA
PBANKA_1238800	A0A509ANR0	Karyopherin beta, putative OS=Plasmodium berghei (strain Anka) OX=5823 GN=PBANKA_1238800 PE=4 SV=1	127.7	59870	156946	229567	643338	32855	80409	730346	564948	153890	237806	278312	42542	0	108028	11131650	19271	3	0.704265	-0.147472	0.650846	-0.33797	58	465	58	61	MEKIVEIIEGLSNPDSRIRTECENTLNYYKKNDLNNTVLSILKLLKSHKNSQVRLQCAILVRNLFRGYIKSSTGDIMDKDKTDDNSLLNGEEENYWDLLSNNLKNIVKSELISNIGIETDKMVRSNLCSNIIDLSSKLLLNNEWPELLSVTFEFCNSNNNNDVLISGYKILGGILNCISDELHGKNEMISSICMKGLNSPSVQVRSECINLISCIVEDNNSPLIKCVQPCIPLILQSLSLMVKNSVSDVAVLDECEKVLQSIGKMIDYNAKFFSKYISNLCDILFDICMKNENELNYDFDNSLKSLSIEALITIPERRPKTALSVPHFLEKIINVSLLFMLDINNDCFNEWMNSLKESKDENQELYDIGEESLDRVGKAYSELSDGPEFIHILYNKVSE…
PBANKA_1010800	A0A509AJJ9	CCR4-associated factor 16, putative OS=Plasmodium berghei (strain Anka) OX=5823 GN=PBANKA_1010800 PE=4 SV=1	29.7	17496	116583	202192	265677	11817	106442	347181	152992	52211	160065	110011	14511	0	65275	4431783	0	2	0.538077	-0.2601	0.597642	-0.387737	14	63	14	54	MDSIIINNLTYNYYHPLRKTRIQALSDLNLVFEKGMRILVCGKNGAGKSTLLSILAGKKLVKEESVSVFNKPVFHDLSLNDRIGYVGEWWNDEYAMNITIKSMFAQYADSKRYKKLMKLFDIDDSKVISGISKGQKKKVQIVSTIIKRKDIYIFDEAAESLDLISRKVLLDFLKNESIKYKCIIIYSTHIFDCMDKWSTHVLYLAKGSISFFSDINSIVSDNKYISMADFVFDNMMDETNKNDKTYNIEEILNLDSE
PBANKA_1214300	A0A509AQ68	Enolase OS=Plasmodium berghei (strain Anka) OX=5823 GN=ENO PE=1 SV=1	49	342949	379927	2318981	4510913	310049	459846	1983126	2600479	1437222	2279156	1826813	312612	56576	982281	29354571	47382	4	0.811321	0.0961041	0.592393	-0.393689	37	924	35	78	MAHVITRINAREILDSRGNPTVEVDLETTLGIFRAAVPSGASTGIYEALELRDNDKSRYLGKGVQQAIKNINEIIAPKLIGLDCREQKKIDNMMVQELDGSKTEWGWSKSKLGANAILAISMAICRAGAAANKTSLYKYLAQLAGKNTEKMILPVPCLNVINGGSHAGNKLSFQEFMIVPVGAPSFKEAMRYGAEVYHTLKSEIKKKYGIDATNVGDEGGFAPNILNAHEALDLLVASIKKAGYENKVKIAMDVAASEFYNIETKTYDLDFKTPNNDKSLVKTGQELVDLYIELVKKYPIISIEDPFDQDDWENYAKLTEAIGKDVQIVGDDLLVTNPTRIEKALEKKACNALLLKVNQIGSITEAIEACLLSQKNNWGVMVSHRSGETEDVFIADLVV…
PBANKA_1117100	A0A509ASE6	Histone H3 OS=Plasmodium berghei (strain Anka) OX=5823 GN=PBANKA_1117100 PE=3 SV=1	15.4	74631	118043	149224	164746	69906	41445	434319	76854	156606	402744	562721	75191	0	0	6188478	44740	2	0.1585	0.430078	0.564618	-0.411239	5	36	3	43	MARTKQTARKSTGGKAPRKQLASKAARKSAPVSTGIKKPHRYRPGTVALREIRKFQKSTDLLIRKLPFQRLVREIAQEYKTDLRFQSQAVLALQEAAEAYLVGLFEDTNLCAIHAKRVTIMPKDIQLARRIRGERS
PBANKA_0602700	A0A509ALS0	Nucleosome assembly protein, putative OS=Plasmodium berghei (strain Anka) OX=5823 GN=PBANKA_0602700 PE=3 SV=1	40.3	30823	90964	472302	829620	71234	173771	819873	789342	306664	432340	311012	103802	0	307449	12313725	10748	3	0.897424	0.0470908	0.582626	-0.413468	19	186	19	58	MATNENNQPIPPEEEKEISSLLESIKIDDEKMSDLTEEQKETLKKLKLYQKEYYDYESKFEYELFLLRQKYHDLYGPIYDKRREALVGSGEAKIGTPNLPEFWLRALRNNNTVSHVIEDHDEEILVYLNDIRCDYIKKNKEKKEGFILSFHFVKNPFFSNSVLTKTYHMKCVDCDNEPVLLHTEATVIDWYENKNILKKNVVKKQHNKNSREVKTVQQTVNRDSFFHFFTSHKVPNSNVIKQLSKHEVAQLEMIIEGDYEVALTIKERIIPYAVDYYLGIIIESESNSIVSDVDSSYTSSENNSNYNSYESNNSAYNDENSNVDTNEYDDNDDEGGKSNEEPLTS
PBANKA_0406500	A0A509AFF6	T-complex protein 1 subunit eta OS=Plasmodium berghei (strain Anka) OX=5823 GN=PBANKA_0406500 PE=3 SV=1	59.6	52506	122653	250407	590264	67454	20099	487091	671327	181654	304957	217198	18418	0	191103	7468386	0	2	0.739325	-0.137518	0.564477	-0.419998	24	249	24	63	MSHLMSLPIVLLKDGTDKAQGKSQIIRNINACQVIVDIVKTTLGPRGMDKLIYTERNVTITNDGATVMNLLNISHPAASILVDIAKSQDDEVGDGTTSVVVVAGELLNEAKVLLNDGIEPNMIIDGFRNACNVSINKLNDLSLSFVNKSEEEKKNILLKCAQTALNSKLISNHKSFFAELVVSAAYQLGDNLDKSNIGIKKVTGGSCLDTQLIYGVAFKKTFSYAGFEQQPKKFNNPKILLLNVELELKAEKENAEVRIDNPNEYNSIVQAEWDIIFQKLNLIKNSGANIVLSRLPIGDIATQFFADHDIFCAGRVEDADLKRTATATGAVIQTSLFNLNESILGNCGLFEEVQIGNERYNIFKDCLKTKAVTIILRGGAKQFIEEVERSINDAIMIVL…
PBANKA_0823400	A0A509AIM6	Phosphoglycerate kinase OS=Plasmodium berghei (strain Anka) OX=5823 GN=PBANKA_0823400 PE=3 SV=1	45.5	279253	830702	1905245	2583228	182071	496778	1377841	1163193	871341	1787337	1437345	228476	94766	784000	15489692	22244	4	0.921944	0.0377736	0.531393	-0.456508	40	779	40	91	MLGNKLTISDIPSVKNKRVLVRADYNVPIENGEVKDTTRIVATLPTINYLKKEGASKIILISHCGRPDGLKNLKYTLKPVAEVLKKLLGEDVLFLNDCVGSDIEKEINNAKNQSVILLENLRFHIEEEGKGVDAAGNKIKANKEDIEKFQNKLTKLGDIFINDAFGTAHRAHSSMVGIKLNVKASGFLMKKELEYFSKALENPQRPVLAILGGAKVSDKIQLIKNLLDKVDRMIIGGGMAYTFKRVLKNMEIGDSLFDEAGSKIVNEIMEKAKSKNVQICLPVDFKIADKFDNNANTKFVTDEEGIPDKWMGLDAGPKSIESYKDVILGSKTIIWNGPQGVFEMENFAKGSIQCLELVIQATQNGAITIVGGGDTASLVEQQKKKDQISHVSTGGGASL…
PBANKA_1122900	A0A509AM85	Phosphotransferase OS=Plasmodium berghei (strain Anka) OX=5823 GN=PBANKA_1122900 PE=3 SV=1	55.4	45691	132622	508154	1077715	62396	149960	452414	500117	282717	473503	167927	0	0	339187	5079639	0	2	0.413921	-0.386534	0.470192	-0.48412	27	325	27	63	MSEYNLKKDDDSPFYKLDTIKCEVPINSEFNDRINKFVNQLRISYGTLEEFVDNFVYELKKGLEAHRRHPNLWIPHECSFKMLDSCISDIPTGQERGTYYAIDFGGTNFRAVRASLDGNGKIKRDQETYSLKFTGTFSHEKGLLDKHATASQLFDHFAERIKYIMGEFNDLDDNNEKSVGFTFSFPCTSPSINCSILIDWTKGFETGRATNDPVEGRDVCKLMNDAFVRSNVPAKVSCVVNDAVGTLMSCAYQKGKSAPPCYIGIILGTGSNGCYYEPDWKKYKYSGKIINIELGNFDKDLPLSPIDLVMDWYSANRSRQLFEKMISGAYLGEIVRRFMVNVLQSASSKKMWQSDSFNSESGSVVLNDTTPDFSECKKIAKQTWDMDFTDEQIYALRKI…
PBANKA_1340100	A0A509AXF4	L-lactate dehydrogenase OS=Plasmodium berghei (strain Anka) OX=5823 GN=PBANKA_1340100 PE=3 SV=1	34.4	646911	1599374	3553148	5165396	360599	1364845	3065282	2620879	1797766	3348847	2553372	555942	130818	1063042	41370494	84875	4	0.994962	-0.00232425	0.510834	-0.484183	31	746	31	90	MAPKAKIVLVGSGMIGGVMATLIVQKNLGDVVMFDIVKNMPHGKALDTSHTNVMAYSNCKVSGSNTYDDLKDADVVIVTAGFTKAPGKSDKEWNRDDLLPLNNKIMIEIGGHIKNNCPNAFIIVVTNPVDVMVQLLHQHSGVPKNKIVGLGGVLDTSRLKYYISQKLNVCPRDVNAHIVGAHGNKMVLLKRYITVGGIPLQEFINNKKITDQELDAIFDRTINTALEIVNLHASPYVAPAAAIIEMAESYIRDLRKVLICSTLLEGQYGHKDIFAGTPLVIGGNGVEQVIELQLNADEKKKFDEAVAETSRMKALI
PBANKA_1456200	A0A509AST9	Rab GDP dissociation inhibitor OS=Plasmodium berghei (strain Anka) OX=5823 GN=PBANKA_1456200 PE=3 SV=1	52	37410	71903	198540	310627	14658	94615	237892	334084	97613	192107	121051	12435	0	69435	2837629	0	2	0.588457	-0.2323	0.48485	-0.501859	24	141	24	69	MNEHYDVIILGTGLKECILSGLLSHYGKKILVLDRNPYYGGETASLNLTNLYNTFKPNEKIPSKYGENRHWNVDLIPKFILVGGNLVKILKKTRVTNYLEWLVVEGSYVYQHQKKSLLFSEKFIHKVPSTDMEALVSPLLSLMEKNRCKNFYQYVSEWNANDRNTWDNLDPYRLTMMDIYKYFNLCQLTIDFLGHAVALYLNDDYLKQPAYITLERIKLYMHSISAFGKSPFIYPLYGLGGIPEGFSRMCAINGGTFMLNKNVTDFIYNDNNQVCGIKSSDGEVAYCDKVICDPSYVMHLENKIQKIGQVIRCICILSNPIPETNDINSCQIIIPQNQLNRKSDIYVNLVSFQHGVSYKGKYIAIVSATVETSNPTKEIEKALELLGPIDEKFIKISDL…
PBANKA_1450200	A0A509B1C2	glycine hydroxymethyltransferase OS=Plasmodium berghei (strain Anka) OX=5823 GN=PBANKA_1450200 PE=3 SV=1	49.6	25799	90190	150553	332316	0	30296	163966	169446	93554	103740	117042	0	0	31603	2410431	0	2	0.649921	-0.206251	0.469417	-0.512145	19	145	19	59	MFNNEPLEKSDKELYSILLDEEKRQKETINLIASENLINTSIKECLGHVVSNKYSEGYPKKRYYGGNDYIDKIEELCCKRALEAFNLNPDEWGVNVQSLSGSAANVQALYALVGIKGKILGMHLCSGGHLTHGFFDEKKKVSITSDMFESRLYKSNSEGYIDLDVVREMALSFKPNVIICGYSSYPRDIDYKRFREIADEVNAYLLADIAHISSFVACGNLNNPFLYADVVTTTTHKILRGPRSAIIFFNKKRNYGIEQKINSSVFPSFQGGPHNNKIAAVACQLKEVKTESFKNYTKQVLENSKALAKYLMNNNIDLVTNGTDNHIVLIDLRKYGITGSKLQEVCNTINISINKNTIPSDNDCVSPNGVRLGTPAMTTRGAKENDMEFIANTLLKAIK…
PBANKA_0805700	A0A509ANB9	Heat shock protein 90, putative OS=Plasmodium berghei (strain Anka) OX=5823 GN=PBANKA_0805700 PE=3 SV=1	83.2	976996	2172217	3716995	6937214	632585	1563405	4560148	6026645	2222542	3325117	3507714	696736	113984	1262934	55012458	231205	4	0.719727	-0.130906	0.476033	-0.525883	67	1875	62	69	MSKETFAFNADIRQLMSLIINTFYSNKEIFLRELISNASDALDKIRYESITDTQKLQAEPEFFIRIIPDKTNNTLTIEDSGIGMTKNDLINNLGTIARSGTKAFMEAIQASGDISMIGQFGVGFYSAYLVADHVVVISKNNDDEQYVWESAAGGSFTVTKDETNEKIGRGTKIILHLKEDQLEYLEEKRIKDLVKKHSEFISFPIKLYCERQNEKEITESEEEAQDGEKKEGEDAEKKEDDGEQKDGEERPKVEDVTEELENAEKKKEKRKKKIHTVEHEWEELNKQKPLWMRKPEEVTNEEYASFYKSLTNDWEDHLAVKHFSVEGQLEFKALLFIPKRAPFDMFENRKKRNNIKLYVRRVFIMDDCEEIIPEWLNFVKGVVDSEDLPLNISRESLQQ…
PBANKA_1216500	A0A509ALV1	Peptidyl-prolyl cis-trans isomerase OS=Plasmodium berghei (strain Anka) OX=5823 GN=PBANKA_1216500 PE=3 SV=1	18.8	42659	389503	406358	1099905	17593	43497	406832	395051	263236	582550	649169	159682	0	47734	10290780	0	2	0.394619	0.346848	0.46856	-0.528269	9	95	9	76	MSRAKVFFDISIDNKNAGRIVFELFNDITPRTCENFKSLCIGDKVGSRGKNLHYKNSIFHRIIPQFMCQGGDITNGNGSGGESIYGRSFTDENFKMKHDTPGLLSMANAGPNTNSSQFFITLVPCPWLDGKHVVFGKVIEGMNVVRDMEKEGSNSGYVKRPVVITNCGEL
PBANKA_0308600	A0A509AF93	asparagine--tRNA ligase OS=Plasmodium berghei (strain Anka) OX=5823 GN=PBANKA_0308600 PE=3 SV=1	66.4	25628	96835	269575	549891	35809	32321	325438	555043	126226	249286	168828	22817	0	55320	4050025	0	2	0.789757	-0.116773	0.463848	-0.535105	32	218	32	65	MAIEVDEETLKIAKEFQKKNEEEIKSKKLKPESIKLDNPSSNLIKINEASCRGRIKICNLLNVPISEVEYNNKDKIEKNKYIDQLVVVCGWSKAVRKQGGGRFCFVNLNDGSCHLNLQIVVNQNIDNYDKLLKCGIGCCFRFTGTLILSPVQNTEKKGLLNENVELTLTDNSIHSFEIYGENLDPQKYPLSKKNHGKEFLREVAHLRPRSYFISSVMRIRNALMLSTHLFFQSRGFICIHTPLITASDCEGGGEMFTVTTLFNEHGDISSIPKTKKKINNNETGKREDKNTNELETNNTNQYIVDFKKDFFSKQAFLTVSGQLSLENLCSSMGDVYTFGPTFRAENSHTSRHLAEFWMIEPEMAFADIYDNMELAEAYIKYCIRYVLNNNFHDIYYFEE…
PBANKA_1134100	A0A509ALA2	T-complex protein 1 subunit delta OS=Plasmodium berghei (strain Anka) OX=5823 GN=PBANKA_1134100 PE=3 SV=1	57.9	80369	124447	295099	458620	42543	108949	470057	525331	175910	310056	268100	19284	4229	142037	6745486	0	3	0.581181	-0.205463	0.451929	-0.539847	31	256	31	73	MADVAKGKSSENLNRNEKQNDVRQMNILAAKAVADVTRTSLGPKGMDKMIEDGKGGVIITNDGATILKEMAVAHPTAKMIVELSKAQDVEAGDGTTSVVVMCGSLLSVCKNLLDKNIHCQKISESFFEASVKSLEILREMSIPIDLNDKNMLIQNAITSLNSKVVSHNSSLLAPIAVDVILKITDINNDKNVDLNNIRIVKKLGGTIEDTEIVDGLIFTSNKICKKAYGIKNLSQAKIGLIQFCLSLPKTDMDNTVVVKDYNSMDRLLREERVIIAKMVKKIASTGCNLLLIQKSILRDAVNDLALDFLAKAKIMVIKDIEREDIEFISKTCNCVPVASLDYFTPDKLGYAENVVTESVGYGEIVKITGVESKNTISVLVRASNNMMLDEAERSLHDAL…
PBANKA_1219300	A0A509AQB3	Heat shock protein 110, putative OS=Plasmodium berghei (strain Anka) OX=5823 GN=PBANKA_1219300 PE=4 SV=1	94.8	35652	295208	292941	1004046	13146	163554	516314	461092	229752	391508	435780	0	0	66894	6368136	0	2	0.711923	-0.185841	0.42718	-0.542119	49	415	49	66	MSVLGIDIGNENSVVATINKGAINIVRNDISERLTPTLIGFTEKERLIGDNALAKVKSNFRNTCRNIKNVLGKIGTGLEKDDLEVNEAYGDLVGCEHGYLGYSVEYKKEKENISAVRIIATLLLYLIRLGEKYIGKECNEIVLSYPPHYTNNQIQCLAAAAKIINVNVLRLISDNTAVALDYGMYRMKEFNEKNGSIVAFVNIGYANTYICIAKFYSNKCEILCDIADNTLGGRNIDNELIKYINNLFINTYKINALYKNGPIELSEMGNGKLDKFFTSKNNETAQINNKVRVKLQDVAIKTKKVLSANNETSIHVECLHEDLDCQGTINRETYEELCSNFFLTKLKNILDKAISISKINDVKNAQSVEILGGTTRIPFIQNFLQSYFNKPLSKTLVAD…
PBANKA_1309900	A0A509APA2	leucyl aminopeptidase OS=Plasmodium berghei (strain Anka) OX=5823 GN=PBANKA_1309900 PE=3 SV=1	72	51441	269864	383462	828913	0	161444	436943	361906	28982	396121	346860	80471	0	50977	4689256	0	2	0.930945	-0.0451799	0.454405	-0.545514	20	175	20	35	MYLTRLNINFVDKIFENKFYKNIIKRYYFYNIKHSQKKFFFSFFISNSIKNKNNYNSDCREFLTFNTYHYQKTPKYKIESLNFSKTIKKFYSTNNIKNFNISFSKFEKMSLKVPQVINLDPTVLPVNYTTPIDDIEIVLKDGIKESCNFDDGLAIFLVNSKSEKDNGNTKISSQIKDSKINEFLSKNDDIFNGKLGTFKSFYMANEKNKYINLSFIRCGTIDEEMTEFEIRKIVSSLVQILHDNKSVSTSIIFEIGINESLFRFFLETVFYEYVVDERFKSNDNKSSGNSENMKNLQIFLRNYNNNYNKQVKKSRTYFMGTYFASQLISAPSNYCNPVSLANVSVELAEKLNLECKILGIKELENLKMGAYLSVGKGSMYPNRFIHLTYKGKGDIKKKI…
PBANKA_1352000	A0A509AY13	Elongation factor 1-gamma, putative OS=Plasmodium berghei (strain Anka) OX=5823 GN=PBANKA_1352000 PE=4 SV=1	46.8	127649	211915	730293	962745	166276	392011	1382861	1696826	344835	903178	748102	86061	11007	465270	20753378	0	3	0.70015	-0.126265	0.426107	-0.583402	27	361	27	61	MDLKLLGPKNDIRCLKVQTVASFCNIKLNIPTFEIGIDDNKDEFIKESPMKRLPVLITPQGSLFESNAIGKYLCSIRSEHNLLGNGIFEEGQVNMWVDFCTFELEIPVCCYISNKLNEKSLKHIQDTFSCLNKHLLLNQYMVGNNITIVDIFMSVIINFCIKSGKMTEAFLKQYGNLYRLYTTIINQKQFKYVMGSGSAVNNKKTPTQPKQPNNKEKKKPKEDADDDINLFSDDGLNEKKTKKTNPLDLLPPSKFSLDNWKYKFSNEKDLLKNAMPTFWETYDSNGFSLYYMKYDKLEDECQISFVACNMASGFLQRLENNFSKYSFAVISVLGENKNYDIEGVWLFRGTEIPFEMKDHPSFEYHIFKKLDINNSNDKKLVEDYWCSKEIISNRPVCDR…
PBANKA_0405200	A0A509AFC2	CCT-beta OS=Plasmodium berghei (strain Anka) OX=5823 GN=PBANKA_0405200 PE=3 SV=1	59.1	58405	142348	286040	541379	47602	129436	551463	641844	162940	440026	313632	79004	0	109950	8919347	0	2	0.98054	0.00781906	0.418362	-0.59881	37	401	37	80	MMNTIVPEVLKQGAQEDKGEIARLQGFVGAIAVGDLVKSTLGPRGLDKILTPLNLEGSRNHQHTVTNDGATILKSVWLDNPVSKILVDVSMQQDNKCGDGTTGVVVLAAEMLRNAEILVENKIHPQIICDGFRMALEAARKSLKESCFCHDMHSDVFREDLLRIARTTLSSKLLTHEKNHFAELAVNAIMRIKDNLNLDLIHIIKKSGGTIKESYLEDGFILEKKIGINQPKSLTNCNVMIANTPMDTDKVKIYGTKVNVHSFEDIQDLENEEKIKMKKKVESIISHGCNVFINRQLIYNYPEQIFREHNVMTIEHSDFDGMERLANCLGAEIASTFEEGLNIKLGHCEKIEEIMIGEDKLIRFSGCKKNGACTIILRGASSHILEESERSLHDALAVL…
PBANKA_0814200	A0A509AKU6	Elongation factor 1-beta, putative OS=Plasmodium berghei (strain Anka) OX=5823 GN=PBANKA_0814200 PE=3 SV=1	30	66654	172744	368798	446055	75327	195954	631331	630906	262028	471476	353599	66671	0	134072	7227186	0	2	0.951141	-0.019702	0.381657	-0.639967	14	124	14	53	MASNNANLLTVKGESDYGKLNSFFAENSYFENYMLSGNDIKIYNQIKCVINKDTYPHLYRWYNHINSLPNYVLDKYMDNKNCKKSCPKKTANDDDDNDIDLFGDSNNDDKSILEKKKQEKEEALKKKKQKEKEKNRSILIIEIKPKSIDTDISKIPKLVKEKIVDENIKWGEEVKKLPVAFGLYKLHMSCIIYDDFVNTNELIEKIENIDLDSEEDKKKRTLILGLDDEEYDEDSPEVEDDLDFLIQSAEIITFNKL
PBANKA_1125600	A0A509AKT1	Pyruvate kinase OS=Plasmodium berghei (strain Anka) OX=5823 GN=PBANKA_1125600 PE=3 SV=1	55.5	240872	539697	1457005	2710840	201009	722383	2370960	3069828	1051253	1788179	1353002	86481	0	980734	32439424	28977	3	0.685776	-0.141776	0.369784	-0.645197	37	942	37	85	MNPFKFKNATAGASLQSAANITLRQILEPNNVNLRSKKTHIVCTLGPACKSVETLVQLIDAGMDICRFNFSHGTHDDHKQMFENVLKAQAQRPNCTLGMLLDTKGPEIRTGLLKNKEAHLKEGSKLKLVTDYSYLGDETCIACSYTKLPQSVKPGSIILIADGSVSCRVLETHDDHVITEVLNNATIGEKKNMNLPNVKVDLPIISEKDKDDILNFAIPMGCNFIAASFIQSAEDVRLIRNLLGPRGRHIKIIPKIENIEGIINFDKILAEADGIMIARGDLGMEISAEKVFLAQKLMISKCNLQGKPIITATQMLESMTKNPRPTRAEVTDVANAVLDGTDCVMLSGETAGGKFPVEAVTIMSKICLEAEACIDYKLLYQSLVNAIQTPISVQEAVAR…
PBANKA_0711900	A0A509AK78	Heat shock protein 70 OS=Plasmodium berghei (strain Anka) OX=5823 GN=PBANKA_0711900 PE=3 SV=1	75.2	943915	2303166	4268840	8232490	830325	1870795	6876810	6423448	2355150	4221590	4181684	810535	18130	1274979	75921075	230482	4	0.725793	-0.105802	0.328617	-0.71763	60	2116	55	69	MANAKAKPNLPESNIAIGIDLGTTYSCVGVWRNENVDIIANDQGNRTTPSYVAFTDTERLIGDAAKNQVARNPENTVFDAKRLIGRKFTESSVQSDMKHWPFTVKSGIEEKPMIEVVYQGEKKLFHPEEISSMVLQKMKENAEAFLGKSIKNAVITVPAYFNDSQRQATKDAGTIAGLNVMRIINEPTAAAIAYGLHKKGKGEKNILIFDLGGGTFDVSLLTIEDGIFEVKATAGDTHLGGEDFDNRLVNFCVEDFKRKNRGKDLSKNSRALRRLRTQCERAKRTLSSSTQATIEIDSLFEGIDYSVTVSRARFEELCIDYFRDTLIPVEKVLKDAMMDKKSVHEVVLVGGSTRIPKIQTLIKEFFNGKEACRSINPDEAVAYGAAVQAAILSGDQSNA…
PBANKA_1235600	A0A509AME3	Adenosylhomocysteinase OS=Plasmodium berghei (strain Anka) OX=5823 GN=PBANKA_1235600 PE=3 SV=1	53.6	95277	131289	459148	820499	72346	274790	654902	1231500	227721	538036	501695	92413	0	127416	8879533	0	2	0.864655	-0.0550791	0.282649	-0.783314	31	370	31	63	MYDCTSKIKDLSLAPFGKLQMEISETEMPGIMTIREEYEKLKPFKGAKITGCLHMTIETALLIETLQKLGARIRWCSCNIFSTLDYAAAAVSTLENVSVFAWRGETLEEYWWCVEKALTWGENGEGPDLIVDDGADASYLVHKGAEYEKLYEEKKILPDPESGKNEEERCFLSLIKSSILKNPKKWTNMAKKIIGMSEETTTGVLRVKKIEKNNGLLFTAINVNDSVTKQKYDNIYGCRHSLPDGLMRATDFLISGKIVVICGYGDVGKGCASAMKGLGARVYVTEIDPICAIQAVMEGFNVVTLDEIVEKGDFFVTCTGNVDIIKLEHLLKMKNNAVVGNIGHFDDEIQVTDLFNHEGIHIENVKPQVDRVTLPNGNKIIVLAQGRLLNLSCATGHPA…
PBANKA_1314800	A0A509AQB1	Elongation factor 2, putative OS=Plasmodium berghei (strain Anka) OX=5823 GN=PBANKA_1314800 PE=3 SV=1	93.3	270003	730832	868657	1932793	234507	365952	1314958	1935462	570458	772279	1089520	198133	0	330569	15825670	22495	3	0.614166	-0.146465	0.268384	-0.808602	54	796	53	78	MVNFTVDQVREIMNKTKQIRNMSVIAHVDHGKSTLTDSLVSKAGIISSKHAGDARFTDTRADEQERCITIKSTGISMYFEHDLEDGEGKKPFLINLIDSPGHVDFSSEVTAALRVTDGALVVVDTIEGVCVQTETVLYQALGERIKPVLHVNKVDRALLELQMEVEDIYQTFARTIESVNVIISTYTDKLMGDIQVYPEKGTVSFGSGLQGWAFTLETFSRIYSKKFGIEKSKMMQRLWGNSFYDAKTKKWSKNQQEGYKRGFCQFIMEPILNLCQSIMNDDKEKYTKMLQNIGVELKGDDKLLTGKQLLKKAMQLWLPAGDTLLEMIVTHLPSPATAQKYRVENLYEGPMDDEAANAIRNCDPNGPLMMYISKMVPTSDKGRFYAFGRVFSGTVATGQ…
PBANKA_0910100	A0A509AJH7	Beta-catenin-like protein 1, putative OS=Plasmodium berghei (strain Anka) OX=5823 GN=PBANKA_0910100 PE=4 SV=1	61.2	0	0	0	0	0	0	0	0	0	0	0	0	0	0	285879	0	1	ND	ND	ND	ND	2	2	2	6	MDLSDEDEIDIDEILKQAENVECVDEDSIKKLATVLKKKKNNNERDRIEHPDKPEKWVASEVDLDEILVNIKNLSVCTNLYKSMIENDIFGDIINLLDHPNNDIVIEVIDIIKEITNPSNIYELNKSVNLMLIDYLNKNKLSHFIINTLDKINEEESEEYYNAISSILNIFENIFELENNLQNDLLTNSKLLFFLLKRINNEIKSDDQNSLYASEILVLLILRINQFAQNVYNDFYYTISIFNFILKYISKYKDKDPPNINKKEILLNCFQALGNLLLLNENKKIFESSNGLELMLKLLSERKFLCFPSLKIFAIVLTSKDICNKFVELSGLKYLFCLFMLRTLNKSKTNTLEFEENIITIISNLCIYCTGTSLGRVLNKFGEKKCEKIIRLLEIRQKY…
PBANKA_1129600	A0A509AKW8	TPH domain-containing protein, putative OS=Plasmodium berghei (strain Anka) OX=5823 GN=PBANKA_1129600 PE=4 SV=1	46.6	0	0	0	0	0	0	0	0	0	0	0	0	0	0	1925610	0	1	ND	ND	ND	ND	2	2	2	5	MVLSNNSLSKLKKKKKKKKENELISNDLEKIEQKWMTSEENQKKGNDTSTEREELLKFIQNQDEFKNIKKDHPIETKEIIKKKNPRFIKNDKDLLKELKKQTEEKKIQQRKIDEESSKREEIETAYLSEIEKKQKEEEEKSILKNKESALIIRNQIQENFIRRQKEEQMKIIEGKLMQKQFEKNKMDDLEKKKEKLESQRVIQNYILENNKKNIELAKELKKEEKRKDAEYVKYLEEIENRKKEYDEQLKKEKEEREMGIHAIRMKQKKNVELQAHFDEIQAIKWLKETKKKDEQKRIIEEDDKKKKMNELKEARLIAMDEKKKKQIEQLEIGKKEAEKLKELSELNEKEKKEEEEKRKLKKKCYYDSLTELVNLKNKNNKKL
PBANKA_0617900	A0A509AH96	Apoptosis-inducing factor, putative OS=Plasmodium berghei (strain Anka) OX=5823 GN=PBANKA_0617900 PE=4 SV=1	74.6	0	0	0	0	0	0	0	21592	11829	0	0	0	0	0	436191	0	1	ND	ND	ND	ND	5	7	5	12	MKKIINVIEKLKIFGEVGKIDVVLRNGRSNINFIEHKNYISILLNKNGYRKFEKGHSIFDRNKKILREAPNYYTILALLSLVCTPVFFYKKNNSMKNNVANCSNLEKTYLLNKEDIKNGEMKEVKVNNNKDTVLVVNIDNTYYCVGPKCPHYSAPLRLGLLTKEYITCPWHDAKFDIKTGECINGPSFDDIPKYNVVVEEDKIYAYIPKEIELFEKKKICPCSGTKSCKEGKKKKIVIIGGGAATLGAIESFLKVGFDGEIIICSQDSYKPYDKPTLSKNISNLDTSSELYNEIKLKNDEYYDKKNITYMLNTTVEKVDDENKKVYLQNGKEIEYDKILITTGLRPAPSPIQNNIQVNNLFTLNKLDDNIKIASFAKEGTKCVIIGSSFIACELTSSLK…
PBANKA_1021000	A0A509AKZ4	Nrap protein domain-containing protein OS=Plasmodium berghei (strain Anka) OX=5823 GN=PBANKA_1021000 PE=4 SV=1	162.5	0	0	0	0	0	0	0	0	0	0	0	0	0	0	114971	0	1	ND	ND	ND	ND	2	2	2	2	MDVVKRKSKPKLKKRNSGNKKIKISSHEVSNNYDKNKSNLSQVLKELCYYKKNKKNVNLLQEIKKITVNFINDLNDDLTKYLNDENSKFKDIYSKSIKLVKNCKILGSFKNNMYLNSNLNIDLGIEYSLDVDLGKKAKYKNFHIYHNMYVNLIKMLFYKKKFVNYLYKTQLKYNVSISVSTNTWINRCKSVIVLNVLSNKKYVGDIIVILFPTKEVELSMYSVYKKYYKNYKLVSNNKIIKENINDQNKYMIQNQKCINKEEILKNKTTYKDIKINFLKKFLISEFYIIKCDKIISNSVKKYEGYKEAVKLLKLWCRNKKLLFTYSIYNTEKKKKKNYDKEYNFSNYSYYTDINSFILGLLCYHVCFTLNLKNSDFLQIFKETIKFLSTFDISQNLMVY…
PBANKA_0904500	A0A509AJB2	SUMO-activating enzyme subunit 1, putative OS=Plasmodium berghei (strain Anka) OX=5823 GN=PBANKA_0904500 PE=4 SV=1	42.8	0	0	0	0	0	0	26175	0	0	0	0	0	0	0	674027	0	1	ND	ND	ND	ND	4	5	4	11	MENSGEYEKEKIYDRQLRLWGVKAQNRMLKSNVLILGLSGINIEICKNLILSGINITIIDDNAINDEMIESIFFLSEEDINKHLCLPIFRELKSINQLINIKGYIGRIDISNDCMVIDNELIYKKNEEINCKEKNDDEVIAIEVKEKSFSIEEYISNYTCVCISCEDYPLYELIKINELCHKNNIGFFSPMCNGKFAFLFSDFGKHVIEELYYKKKNNNNNENNSVINLKGEEKKKENESIEIEYCKLSHFFNVPFENFDKKTNKIIFHMFALIQFEKYKNLGKNDKEINHEEFHNFCRKYTFLKNDWVTEIAKMYKVSFSPSCSIMGGVTSQEIRKFVSKQHESIPNFCVFDMNQNVVCTSMIS
PBANKA_0310000	A0A509ACD7	Protein SIS1, putative OS=Plasmodium berghei (strain Anka) OX=5823 GN=PBANKA_0310000 PE=4 SV=1	38.1	0	0	0	0	0	0	190556	77551	0	57268	48388	0	0	0	2687282	0	1	ND	ND	ND	ND	15	50	15	51	MGKDYYSILGVSRDCTTNDLKKAYRKMAMMWHPDKHKDVKSKKEAEEKFKNIAEAYDVLSDEEKRKIYDTYGEEGLKGSIPTGANTYVYSGVDPSELFSRIFGSDGHFSFSSAFDDDFSPFSTFVNMTSRKPRPSSNANINHNNYNANNYNAKPTTYEVPLPLSLEELYKGCKKKLKITRKRFMGTKSYEDDNFVTIDVKAGWKDGTKITFYGEGDQISPMAQPGDLVFKVQTKPHDRFIRDSNNLIYKCPVPLDKALTGFQFIVKSLDNRDINVRIDEIVNPKFRKIVANEGMPSSKTANMKGDLIVEFDIIFPKNLTSEKKRIIREALANTF
PBANKA_0922800	A0A509AIN0	Small nuclear ribonucleoprotein Sm D1 OS=Plasmodium berghei (strain Anka) OX=5823 GN=PBANKA_0922800 PE=3 SV=1	13.9	0	0	0	0	0	0	16035	0	0	0	0	0	0	0	1365909	0	1	ND	ND	ND	ND	4	8	4	46	MKLVTFLMKLTNENVTIELKNGTLISGVITGVDIKMNTHMKNVKVVIKNKNVGEYNANTKQFLSLDHVTIRGNNIRYYILSDSLPLDTLLVDDTPKNKSSKEKSFSNKDKGRGRGRGRKVPRR
PBANKA_0818600	A0A509AHG9	Pre-mRNA-splicing factor ATP-dependent RNA helicase PRP43, putative OS=Plasmodium berghei (strain Anka) OX=5823 GN=PBANKA_0818600 PE=4 SV=1	89.6	0	0	0	0	0	0	0	0	0	0	0	0	0	0	477360	0	1	ND	ND	ND	ND	5	5	5	7	MENISECIEQKSSEENDETKQNQEITHKRKKEESQADEKENIDMNSNIKRHKIIDLYNNEECKNSVSNNNNFKENEELNMGSIKNFVNKEIINDKNISEKDADENNLINKLTNKRYSDRYLELLESKKKLPAWAAKKNFLKLFKKNNVIIIVGDTGSGKTTQISQFVLESKFSEKKSIAVTQPRRVAAMSVAARVAEELDVELGTYVGYTIRFEDKSCHKTIIKYLTDGMLLRESMFDPLLKRYNVIILDEAHERTLSTDILFGVIKNIQEKRDDLKLVVMSATLDAEKFQNFFNNSKILNIPGRLYPVEIFYTMHPEKCYIKVVIKTVYNIHTNEEEGDILVFLTGEDEIEMTKKEIEKLVSKKPGIPQLVCLPLYSSLPPAQQQKIFEPAPPPRYKG…
PBANKA_0818500	A0A509ANR7	DnaJ protein OS=Plasmodium berghei (strain Anka) OX=5823 GN=PBANKA_0818500 PE=4 SV=1	77.5	0	0	0	0	0	0	0	0	0	0	0	0	0	0	228275	0	1	ND	ND	ND	ND	2	2	2	3	MATNSEEACAIGNEELKKIYYENFIDELNDEELMYKKTVEDLFYIYKSFGFIYSIIKKANLLLNKESFDMFLKSLVSFIDELFIINPNIFDQDFNNLNINYINKEDNSFQNKKKRKVDSEYIYKVDNVNDKQTGNNVDNSAFPNNIENNNFMTLISKRYIEELLKDISNINQEFSSTKCDDFLFIINNILKMKNNIIVDYAKNRIDKIKNTLSIGKHIFSQEEYIDISNNTNGSDEKSVRIYDYIDEMIKKLEQIEPTITSIIFKQNFWYKQIMNKSEYDSLNSVLNLDIDAPNEKTEETYDEVINLLGNKMTNNKDILGAKNKLERIKISYDAEIQRKQQQEMEMLKKLEDKRKAVQFIIDRYDEYTWFDKNSPKKHSFYILGINPRNITEDQLKYFG…
PBANKA_0105600	A0A509AG58	Translation initiation factor IF-2, putative OS=Plasmodium berghei (strain Anka) OX=5823 GN=PBANKA_0105600 PE=4 SV=1	106.7	0	0	0	0	0	0	34438	29809	0	0	23000	0	0	0	1113519	0	1	ND	ND	ND	ND	18	29	18	24	MSKNKKGKKKEDLDAILAELGIEEKREDQVNENEGDEKGENTQISKSKKRKEKLKQKKEQIKLKENDDTAIAETEVVKEEDDKNDEKDGEDGENNETAKGKKKKKKKKDKESKAETGISAAAKAAAERLRLLKEYEEKQKEEERKKREEEEERIRKEEEEKEKKRLARLEKKMQLKKEGKLLSAKAKEEKKKRELYLQTLKESGMLIEPKEKAKAEIINLDINKAKLLLKKKKNKQTSGCANNPNADVKNKEIKDNENKDKESDDIEKEEKEIVLDDWEDFLNMDNEEKKKAEKNNIDQSTKENKQTQIVKKSSTNDKKGKKQKNNKNGENNEDKDNEKTEEEEDIYRSSIVCILGHVDTGKTKLLDKLRHTNVQDNEAGGITQQIGATFFPKDILDKE…
PBANKA_1204300	A0A509APW2	CCR4-NOT transcription complex subunit 5, putative OS=Plasmodium berghei (strain Anka) OX=5823 GN=PBANKA_1204300 PE=3 SV=1	22.5	0	0	0	0	0	0	0	0	0	0	0	0	0	0	355051	0	1	ND	ND	ND	ND	2	2	2	19	MDEKKNEEDINNSIKPNEEVKINNNSKLYKSTQMLLERNSLKLQELIEGSYKNCIIKSDREQYRQYIPRMLWGNPCKYFPTTPLLEFQSPQLFEKFNLDTLFFIFYYQPGTYQQHLASKELKKKSWKYHKKYTTWFFPYGNNIRISNDKSEKGTYFSFDYETTWSNQLKENFLFENIYLENETSI
PBANKA_1427000	A0A509AQF2	Protein phosphatase PPM7 OS=Plasmodium berghei (strain Anka) OX=5823 GN=PBANKA_1427000 PE=4 SV=1	34.6	0	0	0	0	0	0	0	0	0	0	0	0	0	0	461690	0	1	ND	ND	ND	ND	4	4	4	18	MPIVNGAHVISMKNYTIVSDGYGEKGIKKTFEDEFFICENLNVYNKSLHPNFNFSCFCLIDGHNGKNTANFLKKNLAQELSNSFTKIQETYDDTLPIPDHFIRIGVNSACKKIDENLSLEYPGCKDGATCVIILIKNDFAYIANIGDSFAYLCRYLNNTHRAIDLVDIHKPWVLSEKERIMKHGGTIENGRINDIIDVTRAFGDFPLKKYGLLCTGTFKKFKITSDDNFILLGTDGFFRFVDINHVTNEIVALSKKEERLVNVEKKKAVFDAKTICKNMVEHAIIDKKSQDNVTVILIKFLHTLK
PBANKA_1220300	A0A509AQC4	Prodrug activation and resistance esterase, putative OS=Plasmodium berghei (strain Anka) OX=5823 GN=PBANKA_1220300 PE=4 SV=1	43.4	0	0	0	0	0	0	0	0	0	0	0	0	0	0	320855	0	1	ND	ND	ND	ND	2	2	2	6	MFTNQSIENDKQKPCSSDAKTKKNEKLDGKPKTDTFHNKNGLAIKTYAWEIKNPVAIIFLIHGLSGNARLEYLKHNIILKGYEKAILKDGNNFYIYKGSWIEEFNKKGISVYGLDLQGHGLSEGWENLKKHVKEFDDMVYDVLQFINRVHDTLCLEKHKNDINNGDNTNSLHNNIINTKLPPFYIMGQSMGGNIVMRLLETLGKSKDITTNNNKINIKGAISLAGMISIEEIINKPSYKYFYLPFSKVLSTTFPSLRVIPQLYFKKFPYVNDIYYFDKNVCKKSITCKLGYELFKAVQNLNNDISYFPKDVSLLFVHSKVDSACFFNGVQTFFNKIESDKKELFVLEDMDHVLTMEPGNERILKKVTEWILNLSSKN
PBANKA_1242800	A0A509ANV0	Eukaryotic translation initiation factor 3 subunit E OS=Plasmodium berghei (strain Anka) OX=5823 GN=PBANKA_1242800 PE=3 SV=1	62.5	0	0	0	0	0	0	84307	0	0	0	0	0	0	0	3322573	0	1	ND	ND	ND	ND	18	48	18	40	MDEMQNSMLTQNDQAYFIGKVCAYLDPHMTQIIFAWLSENKVLKQDELNKQIALINEGCEKEIVSIENEFTNGNRGVILNCLDSLEIEIEEFQEAMNEYKNDQLNKIGGSVEKKSIMALREWCNTYLIDKNKTYKFSDNIDDKILKLSRYYYQKKDYQKSKQHLLLYILNISEIIINISESPKMRTCYWGIISNIINSFFLNINNDEYLFTVNDDNKTIIKEEIINEINVCVETIIKLSQLLNKEKVTKHEIILQRSWLIHWALILIFHFFMHVMYVKNIYPKNNTFSILQDWFIDEKNLSILNLICPHIIRYYCVYSIFYRNRKDHFELILNTLNLLKSKYTDSFTSLLISIFTDYNFNLAQKCISEIGQICQNDVFLFKLKPYIEEQSRFIIFETYC…
PBANKA_0607400	A0A509AJ02	Protein phosphatase PPM11, putative OS=Plasmodium berghei (strain Anka) OX=5823 GN=PBANKA_0607400 PE=4 SV=1	162	0	0	0	0	0	0	15857	0	0	0	0	0	0	0	958272	0	1	ND	ND	ND	ND	16	21	16	16	MEYIGNIYDKVLSGYVSAHVLKYKSWEEKIIGKEACKNDSDYIKKNLEEILGTFVKNGKFSHSLWEQHKMFIGDEGIYLLGEIITICQIVQFVDSDDIENVQSNEEFKTNLIDELKKRLIIKKKTEILEEKIISNISMCNGDNNFYNNYYYDDIDEDEADNNSDYENDQNNIDSIASVSNSTKHDSNGLAGNNNTKLNDKNAVSNFVEMLCAGKANKYGFCEYDHKFNDKYNLKNIKNEYKSSKSIEHSILSFSEDYDHKYVCLLLNNSGIQEVRILRFSKDCINTNKLLDTLKGTVTFLNELRHLFKYFRSQIFFKDKIYGEFCAYIKFHKSDPNFSGTKALNEFFNSLNENAIKYLFFGLNEYNLNLLEEAISYCPIATFSFFKNIKLLKNMNVNSV…
PBANKA_1409900	A0A509ATP7	AP-1 complex subunit mu-1, putative OS=Plasmodium berghei (strain Anka) OX=5823 GN=PBANKA_1409900 PE=3 SV=1	52.9	0	0	0	0	0	0	0	0	0	0	0	0	0	0	598675	0	1	ND	ND	ND	ND	2	2	2	5	MACISAIFIIDLKGKVIISRNYRGEINANLLEVFYNCVIDQEDNLIKPIFHVNGITYCWVAYNNIYILAITKKNSNATLIITFLYKLIQVLKDYFKVLEEESIKDNFVITYELLDEMIDNGFPQLSEVKILREYIKNKAHQLTVKNVKIPSAITNSVSWRNEGIKYKKNEIFLDVVESLNIIISSNGTVLRSEIMGCLKMKSYLSGMPELKLGLNDKLLFNKNLTNFSTLGNNGNNNILGNNNSNSGIVSSNINAINNNRTKLVELEDIKFHQCVRLSKFENDRTISFIPPDGIFNLMTYRLSTHVKPLFWLDINISKKSLTKIEYIVKAKSQFKNKSIANNVEFHLPVPADVDSPHFQTYIGTVKYYPDKDILLWKIKQFQGQKEYIMNAQFGLPSIV…
PBANKA_0801600	A0A509AHX1	rRNA (Adenosine-2'-O-)-methyltransferase OS=Plasmodium berghei (strain Anka) OX=5823 GN=PBANKA_0801600 PE=4 SV=1	477.5	0	0	0	0	0	0	0	0	0	0	0	0	0	0	206994	0	1	ND	ND	ND	ND	2	2	2	1	MKRAKDEVIEICSLLNNNKDKSINKGIRTLCLFIINNDSISDDEYNNYVRLLIENNYFRVIYFLLCHEVENAKSSKIIQDVDLEFIEIIFYTLNWVFRKLFGGGNIYTKDKNEFDNGKIKVSKFFEKDGNIETYIKNGIFEESHEFSRIGMLLCENLKFVEVIALANISYNAIYILNCIFYFLLYHKRFNEIFLRSPLLLSLIKIRENLEDFSNVKNNDNIFDSMEEENIDNESDMDGKNELYNGSDIMDIKEKSDESSVVNNKIDENDRKKKKNVSNHINNKDEILICNYSFEKELIFLYKHLALKNLKYQTNKNVNQISENCDFYGELLIRKKNGESKIFKEEIINVEKKIKKIKKIKKKLKKIKGNNNDNIRDLIESGSDFEIMRVTILIYFLYCY…
PBANKA_1463200	A0A509AT20	Vacuolar protein sorting-associated protein 26, putative OS=Plasmodium berghei (strain Anka) OX=5823 GN=PBANKA_1463200 PE=3 SV=1	34.6	0	5143	0	0	0	0	0	0	0	0	0	0	0	0	603050	0	1	ND	ND	ND	ND	5	7	5	22	MLANIFGSVCSIDLKIDTEEGRKFSFLRKDKKGEKYPIFSDGEDINGIATITLKPGKKIEHYGIKLELIGQINILNDKCNSYDFFSISKDLEPPGFLIESKQFKWKFSSVDKQYESYFGKNAELRYFVRLNIIKGYSGNIQKEIDFIVQNVCIPPEINNTIKMEVGIEDCLHIEFEYDKSKYHLKDVVVGKVYFLLVRIKIKHMELDIIKIETSGIGRNCVTETSTLSKYEIMDGSPTKSECIPVRLYLSGFDLTPTYKNVQNKFSVKYYINLIIVDEEERRYFKKQEIFLWRKKMG
PBANKA_1209000	A0A509ALX1	Eukaryotic translation initiation factor 2 subunit beta, putative OS=Plasmodium berghei (strain Anka) OX=5823 GN=PBANKA_1209000 PE=3 SV=1	25.5	0	0	32666	0	0	0	95481	0	26534	55317	33862	0	0	0	2838897	0	1	ND	ND	ND	ND	12	33	12	58	MEEKIEEKIEDASKAFADVDKVNDEATQLFDFGEKKKKKKKKEVVSKVEVIIDGTGKVFEKGAVYPYEELLHRIQDLVNKHNIDLCISKKYTIKPPQVVRVGSKKVAWINFKDICTIMNRNEEHVFHFVLAELGTEGSIAGEGQLVLKGKYGPKHIEALLRKYITEYVTCQMCKSPNTAMEKDSRTRLFHQHCNACGAKRSVTTIKSGFHALGRGERRKAKHTN
PBANKA_1436100	A0A509AUR3	Heterochromatin protein 1 OS=Plasmodium berghei (strain Anka) OX=5823 GN=PBANKA_1436100 PE=4 SV=1	32.9	0	0	0	0	0	0	0	0	0	0	0	0	0	0	1093404	0	1	ND	ND	ND	ND	2	3	2	10	MTGSDEEFEIGDILDVKRKKNGFIYLVKWKGYSDDENTWEPESNLLHLTDFKKKMEYLKSIYLNKIDRTSSDSKIMKKNNVQLFDQDDMGNTLMKPKGRTTLISRKRGHKRGMRNRMRNRMRNRIGNKSSASSVTDGSLKKSDDDDNQSIKKESSSNNYNNTLLNIEDVYSVRIKNRKMEFLASLKNASPQWVEESNIRSTGHLNIKVNDFKKYIKRKKTSKGSRIVIKNLHNVGDELYISVIHNINNKEIHSLYPSKVIEYIYPQELLNFLLSRLRYRTV
PBANKA_1451500	A0A509AVJ1	Uncharacterized protein OS=Plasmodium berghei (strain Anka) OX=5823 GN=PBANKA_1451500 PE=4 SV=1	43.1	0	0	0	0	0	0	0	11614	0	0	0	0	0	0	543464	0	1	ND	ND	ND	ND	3	4	3	10	MSSDKLPICLICDQKVFRWIPLIIKQWEIKYMFCQDEEMKKTIIDTFGLYNTKINNVNNVIKYIDELKDENISLLFLALGTNKFHELVLEYVISKKKFYYIFSSDVPSLNAQTLEKFKNLLNNFNSDKDIIYDVKKEYKNINKQFYWNIFNPLMNERVFYNLKNALNELGHIHAVQIESTFIPFLVESEDIGNALFYRSILIISLIEFLFENPKNVLAKSYYIKANEVTINCLSGSVAFDSLNCYFNISVNNLSKIFSLKVYGENGFIDVSYTKEHDCFQMQRCLNHYEYPSIFSEDSHRNALTELQYFLDEQLYTNKYINSYISATHTAICLWKSNGDNIALKHKTDTNGNETGIECKIKSGESCILA
PBANKA_0405300	A0A509AFQ8	40S ribosomal protein S23, putative OS=Plasmodium berghei (strain Anka) OX=5823 GN=PBANKA_0405300 PE=3 SV=1	16.1	0	28943	38632	0	24401	0	224077	23745	0	47144	185816	0	0	0	1863846	0	1	ND	ND	ND	ND	4	19	4	33	MGSGKPSGLRSARKLRIRRRTQRWADKGYKKSHLGTRWKSNPFRGSSHAKGIVVEKVAIEAKQPNSAYRKCVRVQLIKNGKKITAFVPGDGCLNFIDENDEVLVSGFGRSGHSVGDLPGVKFKVVKVARVSLLALFKEKKEKPRS
PBANKA_1131600	A0A509AKY6	DNA replication licensing factor MCM6 OS=Plasmodium berghei (strain Anka) OX=5823 GN=PBANKA_1131600 PE=3 SV=1	107	0	0	0	0	0	0	0	0	0	0	0	0	0	0	1484792	0	1	ND	ND	ND	ND	24	40	24	30	MSSIFNENELSGIDAHSVFGNNNNNEKESYENKRKKFNDNSNMSVNQRGEDEEDEEDDEEDEEPSHVQDENMAKVFEKFLKTFSEKKNGKTDADSDEDSDSVWRDNLNFDFPTELEIVNNAHYVQVLFTILQNSFSRNKVLVVDMKHVLMWEPTDRNRFDIGSQLYMYIKRHFLRILDIFEQKVQILAESINPIKTKEVGKICLRFYNKKNPIHSLRSLRCEMLGEMISVRGQVTRTSDVRPELTLASFKCNECGNIINGVKQQFRYTQPNKCPSASCSNMHDWSLVLEQSYFVDWQKIRLQEIAQESPPGSMPRNMDVILRNDIVDSVHAGDRIIVTGCLIVVPDIPTLMKPGDIPRSVARQMLKKNENSLVSQGLTGIKGVGVQDLNHKLCIYACQI…
PBANKA_0714200	A0A509AMT8	Chaperone protein ClpB1, putative OS=Plasmodium berghei (strain Anka) OX=5823 GN=PBANKA_0714200 PE=4 SV=1	118.9	0	0	0	0	0	0	0	0	0	0	0	0	0	0	229973	0	1	ND	ND	ND	ND	3	3	3	3	MQKNFIALFVIITISFLCKQGDGKRRFESRLNASNIDNNNILTPFGIARKSIRKNEAFINSNLKGDDILKRDKKKGFKSKINENKDEHNIKSKKYDQSGIKNRLSYSTKDQNHVNNYFFSKIENNSINKRNKMNQLFMSDEEYTINSDDYTEKAWDAISSLNKIGEKYESAYVEAEMLLLALLNDSPDGLAQRILKETGIDTDLLSHDIDVYLKKQPKMPSGFGEQKILGRTLQTVLSTSKRLKREFNDEYISIEHLLLSIISEDSKFTRPWLLKYNVNYEKVKKAVEKIRGKKKVTSKTPEMTYQALEKYSRDLTALARAGKLDPVIGRDEEIRRAIQILSRRTKNNPILLGDPGVGKTAIAEGLAIKIVQGDVPDSLKGRKLVSLDMSSLIAGAKYR…
PBANKA_1120700	A0A509API3	Nascent polypeptide-associated complex subunit alpha, putative OS=Plasmodium berghei (strain Anka) OX=5823 GN=PBANKA_1120700 PE=4 SV=1	20.8	0	0	30238	16835	0	0	60759	0	0	49934	72572	0	0	0	1800043	0	1	ND	ND	ND	ND	9	52	9	63	MQDDKINSKDEISSSSSCEENEENRNILNPPNRPKMSKGERRARKMLVKLGLKAIPNTHKVIIKKSQKMIFAVSNVDIYQIEGTDSYVIFGDAKTDEITNSFNSFLPENTSNEDETGAEQEVNFEDAEKADEKVQDLENGEKAKDVSMDDVELIISQTKCTKEKAIEVLKKNNNDLVQSIMELSG
PBANKA_1401900	A0A509ATD2	LisH domain-containing protein, putative OS=Plasmodium berghei (strain Anka) OX=5823 GN=PBANKA_1401900 PE=4 SV=1	33.5	0	0	0	0	0	0	0	0	0	0	0	0	0	0	398934	0	1	ND	ND	ND	ND	3	3	3	17	MKIHLSSDEVNLLVYRYLVENGFVHTAYAFLNEGNISKNTYYVSHCDKLPSNALVSFLQKALIYIYIEYHTDHKDGKRISCEEPFSFFRRHECWNDENNSSDDDNKTELQLDDKISSNNLNSFATSNNSNNRNIDNDDSNNSSSNYNNNSTKNNNNNNNNNDNNNNKPKENTNPQKPKSSRPHIYSSSFSNFASLNYNDSNLSFKDIKRNYVSIFAQAKTTKKKSSNKKTNNNDDSKEKNGKEESNSTSGNQKKKAKAIKSSGKSNKVTESDNNNNKSEDGEANFSFDKKKKKT
PBANKA_0610200	A0A509AH12	DNA helicase OS=Plasmodium berghei (strain Anka) OX=5823 GN=PBANKA_0610200 PE=3 SV=1	85.5	0	0	0	0	0	0	0	0	0	0	0	0	0	0	1745611	0	1	ND	ND	ND	ND	22	32	22	40	MLGIQEGRAFFNAARNPNNRPENNIRIEDNLPSLNEVYNYFQDFLSRYSSNTLKEGNLKRTLFENVKNNNFTLDLKLDDIYKQQTVFENNEISATPISERKIKKPDNYSAILARALSERPLTYLPTVERVCYEVCETANILSDEDEHLNYIQINLLNTFIRPTPIRGLLAATQERFVVVPGIIVQASKPQHKMRKITLQCRYCDHKMSIDVPLWKDKPQLPPYCRYSSTMKSSMGVANPMDNQLGCNGVLEPYVILPNECTFVDIQSLKMQELPEAVPTGDMPRHLQLNATRYLCEKMIPGDRVYVHGVLTSYNPNPKPTRVDGTNFSYLHVLGFQKYDDMSGNDLNFDVEERNELTLLAAEHDIHDKIFKSVAPELYGMDEVKKACACLLFGGTRKRI…
PBANKA_0208000	A0A509ADK9	Cyclase-associated protein OS=Plasmodium berghei (strain Anka) OX=5823 GN=PBANKA_0208000 PE=3 SV=1	18.5	0	0	0	0	0	0	0	0	0	0	0	0	0	0	283165	0	1	ND	ND	ND	ND	3	3	3	32	MASKPSLNFKDNQWEVCNYKNEKIIKLEKVELNNSVNIFNCENTTFTIENHKFKSLQIQNCGKCSIVLNNLISSIEIIDCKKIKIQVLGKCSSISIDKCIGVEIYLSKDNTESEFTTALSSEMNVHFEKNGEWKEITIPEQYQHTLCGGKLNTRVSDLYNY
PBANKA_1426200	A0A509AUD0	CCR4-associated factor 1, putative OS=Plasmodium berghei (strain Anka) OX=5823 GN=PBANKA_1426200 PE=4 SV=1	202	0	0	0	0	0	0	0	0	0	0	0	0	0	0	193133	0	1	ND	ND	ND	ND	2	3	2	1	MDERTKIVDVWANNLEEEFEKIRDVIESHPYVAIDTEFPGIVARPTGNVVDYNYQTIKCNVDLLKVIQLGVTFSNGKGVLPRVSTWQFNFKFDLDSDMYAQNSIDFLKLSGINFEKHQSLGIELLHFGEVIMSSGLVMNEDVKWISFHGCYDFAYLLKILTCCALPHSEGEFFDLLHDFFPSLYDIKYLLLNLNIKQLSRTFSLQKISEILSVKRIGRQHQAGSDSLVTCKTFFKLLELYFDNKIDDKKYSGIIYGLGTTIKNYNNKFDDNAYKHNNNNNNSGNNNGVYYGNNNYLKKNNNNGNNTSIYGNHYCNDKNNDNNNNNSQYWDGKNDIMSANNTNNHYIHNNINSNNNSDLYTYVDSTNNREYMIAFSKDAVKGNIKSDVLYNLYSDINQNN…
PBANKA_0109700	A0A509AJA1	SWIB/MDM2 domain-containing protein, putative OS=Plasmodium berghei (strain Anka) OX=5823 GN=PBANKA_0109700 PE=4 SV=1	94.1	0	0	0	0	0	0	0	0	0	0	0	0	0	0	573209	0	1	ND	ND	ND	ND	3	3	3	3	MEPIDNLNPNNTFVDDYFEKEDVIKKLYSSVLTRTIKEIDEKKFNLIETSIKYENEINKCIDISNYYINEAFSSALKTEELRRKLRIHIYTVFNDGDKETNYPVDVKIENSENIYKYAIPSSFTFNIHGYILNKDENDYDSSESENVRSKKVKFENVNGNNLITPKEDDCKYSGTEIDDISENNEKIDYCNTNVMKFTSFFSTIMVVRDKETIIYDKKNKNYYDCDKLTFTRIINERKKEIIKIFLFLDQKIPFFELSPDLKNLMKSSEETMPEIIKRIYEYSLENDLVGSNCVMQTDEVLKPILEVDEYEFSDLPNLLQKHLSIQKPIVLEHIVDLENEDESESIYDVVIDIFEPYMTLDEGKYKKFVLDSHHLNNLVSFLKINEINDNKQSELNEGD…
PBANKA_1010600	A0A509AKK1	non-specific serine/threonine protein kinase OS=Plasmodium berghei (strain Anka) OX=5823 GN=PBANKA_1010600 PE=4 SV=1	16.9	0	0	0	64667	0	0	0	0	0	0	0	0	0	0	189052	0	1	ND	ND	ND	ND	2	2	2	21	MADKLTEEQISEFKEAFSLFDKDGDGTITTKELGTVMRSLGQNPTEAELQDMINEIDTDGNGSIDFPEFLTLMARKMKDTDTEEELIEAFRVFDRDGDGYISADELRHVMTNLGEKLTNEEVDEMIREADIDGDGQINYEEFVKMMIAK
PBANKA_0109100	A0A509AEQ7	transketolase OS=Plasmodium berghei (strain Anka) OX=5823 GN=PBANKA_0109100 PE=3 SV=1	75.5	15638	79827	79159	225496	0	30643	88111	178052	35063	76635	43625	0	0	0	1620025	0	1	ND	ND	ND	ND	23	92	23	47	MNTEIDIKCVNEIRMLAAELPLKANSGHQGAPIGCAPIAHILWGYVMNYYNEDTEWINRDRFVLSNGHASSLLYTMLYLTEQGLNLDDLKNFRQLGSLTPGHPENYITKGVEVTTGPLGQGAGNAVGMAICAHNLSEKYNTNDFEIFNNYIYALCGDGCMQEGVFCEAASLAGHLGLGRLILIYDDNKITIDGNTELSFTEDIGKKFESFNWEVKIVKDGNTNFEKIYKEIEECKKNLKQPSLIIVQTLSGFGTKVEGSYKSHGLALKDDDIKNAKKNLGLDFEKKFHISDQVKNFYKNVLQKNKENYIKWKETFDKYMLKYPEKGQEILRRFKKELPNNWENVLPKYTVNDSPLATRNLSGIALNCINKILPELIGGSADLTESNCTALKDEKDITKN…
PBANKA_0410400	A0A509AGD2	Glycogen synthase kinase 3, putative OS=Plasmodium berghei (strain Anka) OX=5823 GN=PBANKA_0410400 PE=3 SV=1	49.7	0	0	0	0	0	0	0	0	0	0	0	0	0	0	777584	0	1	ND	ND	ND	ND	2	2	2	6	MKDWHTDGDNNACQENEQNNNDIDNKRDNDYTSIEVNNVCIDENHKIGENEISKYSNKTYKLGNIIGNGSFGVVYEATCIDTSEKVAIKKVLQDPQYKNRELMIMKNLNHLNIIYLKDYYYTEAIKKNEKNVFLNVVMEYIPQTVHKYMKYYLRNNQFLPIFLVKLYSYQLCRALGYLHSKLICHRDLKPQNLLIDPKTHTLKLCDFGSAKSLISGQRSVSYICSRFYRAPELMLGSTNYTTHIDLWSLGCIIAEMVLGYPIFSGQSSVDQLVRIIQILGTPTEDQMKVMNPNYADVKFPNVKPKDLKKVFPKGTPNNAINFVSQFLKYEPLKRLNAIEALADPFFDEIRDPNVKLPKYVEKLPELFNFSVEEIREMSDLCRKKVLPKQNYEECQELNS…
PBANKA_1142100	A0A509AT77	Uncharacterized protein OS=Plasmodium berghei (strain Anka) OX=5823 GN=PBANKA_1142100 PE=4 SV=1	399.4	0	0	0	0	0	0	0	0	0	0	0	0	0	0	227202	0	1	ND	ND	ND	ND	5	5	5	2	MFFSKERRENEDVKRSSGNKNMSHHKNKKYVRHLKQSLYNNKYINKFQKRNKDLKTKKGGNVNYVYNNVSMDINNNNNKSNQLYFNKNLINRNNKETQNRINAYKKNYFNHDNINYNSLINTQTPVCSIHIDKTDEEITKQLQYNEKLNSSQYNNSNNDVINDIQNNTYPTFIEEIIFTTNIVLFTGILILPTNDKIFHNLDFEGKTNPLPNECNLNIYINVVNKYNSQYFKQLFPVSYNFKSRLFYAVPDNNSAVDSTLLIDKIIIKGNFKTLSFIVLGQSEEINESLRYYRENLYDINMKTKINETTVDVENIETEKDDVYSPKKPVYIKTYNIANLMDENYDFEKKHTINDHKNYENSQIGELNELSTFSNILEEEFVKNNIHQINKNNKNDHENN…
PBANKA_1223000	A0A509AMA5	Uncharacterized protein OS=Plasmodium berghei (strain Anka) OX=5823 GN=PBANKA_1223000 PE=4 SV=1	133.4	0	0	0	0	0	0	0	0	0	0	0	0	0	0	299839	0	1	ND	ND	ND	ND	2	3	2	2	MVFKKGVKKNTTKSAGKENSKSQENEETGETDNSELNNNQMTSDQNNQNNILLIGDDNLSFCQFIIEAYPVSNLYIASILTELEINYMLRDLERKKKIREKNEHIEESNKNSRAYLDTEIVDKEKNEPFYYTKKFKEKYANKNLHLIFNTNLFALKSYFPTNFFHTIFLILPGMSYNIKEKGLRYSDQITTLRLYYFVISIIIEVINVSIKNVQVHILWTTEKLKSLVENNNIAKSEINKEDYEKNSITNTLTSLKNLVCNTDCGMENSESVNQILEEKDPTQLNKDIEHSENFYEEEDADDNKVDVNGNEIDVNGNEIDVNGNEIDVTGNEIDADDNEVDVNGNEIDVNGNEIDVNGNEIYVNGNEIDVTGNEIDADDNEVDVNGNEIDVNGNEIDVN…
PBANKA_1209300	A0A509AQ25	PIH1 domain-containing protein OS=Plasmodium berghei (strain Anka) OX=5823 GN=PBANKA_1209300 PE=4 SV=1	40.1	0	0	0	0	0	0	0	0	0	0	0	0	0	0	336858	0	1	ND	ND	ND	ND	3	3	3	12	MDLKSAGNVWDVLNDLYKNDKQLYDKFMKKHLNEMHASKAIKPKFCFCICTNVEKVSIKTSINEYKEKVCDYFIYIYHTKKIKSSILSPDFIENLNNLNFDNIYISTSKVKGESSKDMYAEAVIHTNIYKNMNNINFKNKIITRILEIVYNSEKALRNDIIINTNSFHFIDLNYIPKTTHYLNPKYVDNNILNEQPHANVDEADIKFLNILNEKNKKDNNKEQEKDQILIHDSSNDILKDIHPIKTVKNTQINKVDKTKIPKEVKSYQYTIIDRFLHIIMTFNNISYTNLETLKDGNNIYVYASNKSDECMSLHFKENLSDNIKAYFNEALLKLTISVELLY
PBANKA_1310200	A0A509ARI8	Nucleoporin NUP313 OS=Plasmodium berghei (strain Anka) OX=5823 GN=PBANKA_1310200 PE=4 SV=1	313.1	0	0	0	0	0	0	0	0	0	0	0	0	0	0	291621	0	1	ND	ND	ND	ND	3	3	3	1	MINNKRKRAYIQNERHENSNESESYVKLENEKGHDKDIIYDQIYSIPKKNKPRCLVLSNSKDNLIANFTNLLKIDNYGVEFKTKWYVHLFRICLFSERLYGPTQTTGSGKNKNEKGNEENINKLILEYNVDELLKNVQKLILRKIDCENLYYQKILVIVCLLFDYFQNKKYHNIKTVKHLEGEEEDTKNSIENFETKNGSDIHINDNSKKKIKSKKRYLETTKKQIYDDSGDDTTNKDKLSNYSENNKLLGSELLKNNEKNKFKPIDIINNQKNYYIIEFKNILYNEKKKFYNLEIFYHITNLIIHKYWYSQEYAHYNIFIWFLNYINNKLEIKKSINNINSKLEMFINLHPKIFNISHAKKKRKKNNYQHNNIIHNDINPTNPNNSHYFEGGIVDYPY…
PBANKA_0816200	A0A509AKW6	Ribonuclease H2 subunit C, putative OS=Plasmodium berghei (strain Anka) OX=5823 GN=PBANKA_0816200 PE=4 SV=1	36.8	0	0	0	0	0	0	0	0	0	0	0	0	0	0	365190	0	1	ND	ND	ND	ND	2	2	2	8	MNSFFGDDTQEEEKLLQEIIKEKSDEIPYIIKEITCSELSPNGKKHMGAGIKTSLKDECAVKNEQGDAENNSKNINNCAEFNNPNKSYDNNTNFGNEKNEIRYNNEYILNVKLNTNIFPFHIKKNGKINSDIFFIPYISEDNKDVITKYTYNYDYYDIYPQNVELTNKNFHANKRKDIDSSRHGNLVKCKKEHIDKDENENEKSNFQKFLVHFRGRLFIGSNINYSFFNIQTFLATLSNDDHTTSETQNKLCYVNKKIKTYNHIPNATYWKQDEYPDIFDSNIQKLQMFFISQSIVNYDKESQLKAHEGELIF
PBANKA_1320400	A0A509APW0	Armadillo repeat protein OS=Plasmodium berghei (strain Anka) OX=5823 GN=PBANKA_1320400 PE=4 SV=1	78.9	0	0	0	0	0	0	25646	0	0	0	0	0	0	0	1511152	0	1	ND	ND	ND	ND	11	19	11	24	MNNSNFENSLSTCMPYFLNNNINLNIDKDKNNINMINNNNGNNNCPSFINNGNEQNNSSFSQINKNEESIDILVNQMESSFSISTNIIKNVSNLLESSKIEDKIKGIRLVYASLHYKYKNNNDYKKNLLNRGCTMLNIQDKNTNEQNDSEANNNNNSNDLNNNNSNNNTMSNPFFQNNYNNNDHMNDGINTNNNNNTNNCNSNDGLNNYGNNTPINFKVLNSMIFTNCKSINDVDEYFHLLDKCLTRENVIDINLSDIFEMNIINIIKSLLYNYIFHNDEIIVEALTLLIIIFGCCDQNEKIKQDVVDELYTCTVYMLKNICHKSCEKIYASLIVQLIISLLRTIMIYDISKLKNDLLDNIGIVEMLLKSVENVPNLNGVRVCYTLVVYGLKMFYVSAC…
PBANKA_1325600	A0A509ANQ0	valine--tRNA ligase OS=Plasmodium berghei (strain Anka) OX=5823 GN=PBANKA_1325600 PE=3 SV=1	126	0	0	0	0	0	0	0	0	0	0	0	0	0	0	359280	0	1	ND	ND	ND	ND	2	2	2	2	MYKRGVLNGLTYQCNNKSGCKKINNNIRRNIGNNRFNIMEKKSVIKGNLEHMKDAYDPKEVELKWYKFWEENGYFKPKKELIENKDNAKKFVIVLPPPNVTGTLHIGHTLTVAIQDSLVRYKRMKNYLTLYIPGTDHAGIATQTVVEKMLYKKEKKIRHDYGREEFVKKIYEWKDIHGNKINNQIKSIGASVDWSREYFTMNEKLSMAVKEAFVRFHEAGLIYRDNRLVAWCPHLKTALSDIEVNNEEIKKPTKVKIPSFNHLVEVGVLYKFFYPVKNSEEKIEIATTRIETMLGDVAVAVHPNDKRYKHLIGKELVHPFITDRKIIVISDDYVDMEYGTGAVKITPAHDKNDYEMMKRHKLNYINIYTLDGHINKNGGPLFEGLHRFECRFKIQEKLK…
PBANKA_0807000	A0A509AIP5	DNA-directed RNA polymerase subunit OS=Plasmodium berghei (strain Anka) OX=5823 GN=PBANKA_0807000 PE=3 SV=1	260.9	0	0	0	0	0	0	17977	0	0	0	0	0	0	0	880609	0	1	ND	ND	ND	ND	14	18	14	7	MTVDLNIPYSACELKRVKRLELGVLDPEIIKKIGVCEIVNVDIYKDGFPRDGGLNDIRMGTIDYKALCGTCNMNVKNCPGHFGYIELAKPMYHYGFMNVVLNVLRCVCYHCGRLLCDMNSSKVKYIEKIKVNSLRLKKLSELCQGIKVCNHSSAQDDNIYINDTSIDKFYNNDLSNLNVNQQMLLNSSNNYSNLFEMISKEDVDCGCVQPKYTREGPNMYIQFLHNNNEDDIDGSKRRLSAEEALDILKKIRKEEMSILGFNSDRCIPPSLILTFMPIPPPCARPYVQYGNQRSEDDLTLKLLDIVKTNIQLKRQTDRGAKSHVLQDLCSLLQFHITTLFDNDIPGMPIATTRSKKPIKAIRTRLKGKEGRLRGNLMGKRVDFSARTVITGDPNLNIDY…
PBANKA_0822800	A0A509AJ62	50S ribosomal protein L29 OS=Plasmodium berghei (strain Anka) OX=5823 GN=PBANKA_0822800 PE=4 SV=1	25.7	0	0	0	0	0	0	0	0	0	0	0	0	0	0	319234	0	1	ND	ND	ND	ND	4	4	4	25	MLNLTSLLIKKKPNAVDEINSADKANKENGENNIIDNNDSVKIKLINMKDYKTKKLLDERKNVKAWAPSTNNKKSNKSEKKKEKQKDKLTDENKKNDEKKEPAKKIFVPSIIKQKAVVKKENEKEELFPNLLQAKKTAKIEKEEKKNAPQKKKKKEKASNKTKEEENQFPPIEEIKKINFNIFDVVDIKNEYERIVRDIDKVALKYKNKKKFDNTMILCN
PBANKA_1204400	A0A509AMU6	DNA/RNA-binding protein Alba 3, putative OS=Plasmodium berghei (strain Anka) OX=5823 GN=PBANKA_1204400 PE=4 SV=1	12	0	16213	0	21708	0	0	222141	0	38568	131891	127940	16001	0	0	7570394	0	1	ND	ND	ND	ND	7	56	7	70	MTSTEDISQERAENSIQVSMTKKPTFYARIGKRMFTGNEEKNPFDEVIITGLGSATKIAIGAASIMEKEDIGQIIKIQTAYFSSDRINRRIPKITIVLKKHPNFVAN
PBANKA_0503600	A0A509AL02	60S ribosomal protein L30e, putative OS=Plasmodium berghei (strain Anka) OX=5823 GN=PBANKA_0503600 PE=3 SV=1	11.8	0	0	0	0	0	0	30450	0	0	0	13366	0	0	0	1181762	0	1	ND	ND	ND	ND	4	10	4	55	MAKKAKKSVGDNINSKLQLVMKSGKYQFGRKSCLKALRTGKGKLVIVSSNCPPIQRSVIEYYAMLSKCGVHDYHGDNNDLGTACGKLFRISCLVITDVGDSDIIKTNE
PBANKA_1120800	A0A509AP65	Signal recognition particle subunit SRP68 OS=Plasmodium berghei (strain Anka) OX=5823 GN=PBANKA_1120800 PE=3 SV=1	83.8	0	0	0	0	0	0	25359	0	0	0	0	0	0	0	635540	0	1	ND	ND	ND	ND	9	10	9	13	MEDRTLHQKIEMETNGPEKLRVDNIPENIPESCEEKIVDKMTIREPHTLLIIPEKKISFDIFCYLIGIYKKHGLYFEEMERFLKYVKRRRMKLRRNVLNKVKKVGNKYTSKIYDPDVINDKYFELLLLDVEICRAKYIKVKTDVNNLKAPYRSKYCYLRRLKKGLKKINFLINSISKVIDKNTELQIKCYHAYIEIAYLLEIKKYEECISKIIEFSKLVKLIKRITVNNITSNVNNTSIEYDKKNGEENLINLSENIIVEKSKLFLEEEKRINEIYEYFLSNINSYERICLYNIKKDNVKKSNEKLQEEDLEEKKDKITEIETYQNNENETLQIYCIDNTIIIKIKNKRYKLINDGTNDSILKIKNILDNDIKTVIEYDEIIKLNQNFNLNEEIKNKNF…
PBANKA_0918800	A0A509AJS5	rRNA (Cytosine-C(5))-methyltransferase, putative OS=Plasmodium berghei (strain Anka) OX=5823 GN=PBANKA_0918800 PE=3 SV=1	71.9	0	0	0	0	0	0	0	0	0	0	0	0	0	0	452337	0	1	ND	ND	ND	ND	3	3	3	8	MDNEDNKSNESVDIEIVKTEDKEKSFPLFDNDHFEINKSDEEYDLENDSEMDNQDEEDEVIPNDEAELSSNISYDDMNSNEEEEEEEEEEEGEIEEEGEGENKLRDMGKKMKNIVGRKKKYLNKKENIYYDGLGIYKNDQMMNNDDIEDRIKYLLLLLSDPEKLNNPNLIKIEKREIIKEILYYYSYYYEYTKEMIKYLYYLFDIKELYLFLEINNMPKEIHLRTNTLKITRTNLLKILKNKNIAIQDGSNWNNVDITLTDTSSNVGSLNEYLYGYYIIQSSSSLIPVLELNIKENELVLDMCAAPGGKCTFICTIQKNKGIVYANDINKLRCKAIEAHAARMGINNLIITSFDSLKINKYFKFKFDKILLDAPCSGTGVVNKNKNARRKTIKEIRDLS…
PBANKA_1140600	A0A509AMI7	DNA-directed RNA polymerases I, II, and III subunit RPABC1, putative OS=Plasmodium berghei (strain Anka) OX=5823 GN=PBANKA_1140600 PE=3 SV=1	24	0	0	0	0	0	0	0	0	0	0	0	0	0	0	816487	0	1	ND	ND	ND	ND	6	6	6	35	MEDPVTRFYKCRKTCCEMLEDRGYIITAREKLENFAAFKELFEENEKLRSRMTIITSHKNDANNKIIVYFVDEVKKTGVKPLRELTEKMDEKSIQRAILVTQNTLTPFAKDAIKEAAPRHIIENFLDTELLVNITKHELVPRHIPLTSDEKRNLLQRYKIKENKLPRIQDVDPVCRYFGLSKGQVVKIIRPSETAGRYVTYRLVV
PBANKA_0520600	A0A509ALJ9	Enhancer of rudimentary homolog OS=Plasmodium berghei (strain Anka) OX=5823 GN=PBANKA_0520600 PE=3 SV=1	12.5	0	0	0	0	0	0	0	0	0	0	0	0	0	0	699198	0	1	ND	ND	ND	ND	3	4	3	41	MNTGYSDVVLLVQFSKKIESRTFVEYNSLKLALNGICQLYEQAIKENDPSVQRITYSMNDLFVYIDNVQKMTILLFHQPTWSYRLHDKKWIKQKLVEHIKDQIGQ
PBANKA_0709100	A0A509AHC5	60S ribosomal protein L22, putative OS=Plasmodium berghei (strain Anka) OX=5823 GN=PBANKA_0709100 PE=3 SV=1	16	0	0	0	0	0	0	28651	0	0	0	0	0	0	0	886114	0	1	ND	ND	ND	ND	6	9	6	28	MAVKKDLKSAKKNTGKNAKKISKVLGKKSKIVKSTKGVKYILDCTKPVKDTILDISGLEQFFKDKIKVDNKTNNLKNKIAVSSDDYKIYITVHIPFSKRYIKYLAKKYLKMHQIRDFLRVIAKGKLAYEFKYFQLNNE
PBANKA_1320900	A0A509ARR9	Thioredoxin OS=Plasmodium berghei (strain Anka) OX=5823 GN=PBANKA_1320900 PE=3 SV=1	11.6	0	0	22774	21117	0	0	0	0	0	0	0	0	0	0	457806	0	1	ND	ND	ND	ND	4	9	4	48	MVKIVNSLADFESSISQNEIVIADFFAEWCGPCKRIAPFYEESSKKYTKIVFIKVNVDEASEVTEKENITSMPTFKVYKNGVAVETLMGANEGALKNLIEKYAS
PBANKA_1242700	A0A509AQY5	AP complex subunit beta OS=Plasmodium berghei (strain Anka) OX=5823 GN=PBANKA_1242700 PE=3 SV=1	107.1	0	0	0	0	0	0	18805	0	0	0	0	0	0	0	1076542	0	1	ND	ND	ND	ND	14	20	14	21	MSDLRYFQTTKKGEIHELKEELHSSHKEKKKEAIKKIIAAMTVGKDVSMLFSDVVNCMQTSNIELKKLVYLYVINYAKVQPELAILAVNTFRKDSSDPNPLIRALAIRTMGCIRLEQITEYLIEPLRRCLKDEDPYVRKTAVICIAKLYDISPKLVEEEGFIDTLLNILDDNNAMVVANAIISLTDICENSNKNILKDIINKDENNVNKLLNAINECVEWGQVFILDALVLYEPKNSKDAERALERILPRLSHANSAVVLSSIKVILSLLDKINDKEFVKNVHKKLSPSLVTLLSSEPEIQYIALRNINFITQKFPHMLSDKINMFFCKYNEPAYVKMEKLDIIIRLVTDKNVDLVLYELKEYSTEVDVEFVKKSVRAIGNCAIKLPQSSEKCINILLD…
PBANKA_0311000	A0A509ACF2	Protein transport protein SEC31, putative OS=Plasmodium berghei (strain Anka) OX=5823 GN=PBANKA_0311000 PE=3 SV=1	156.5	0	0	0	0	0	0	88306	0	0	0	0	0	0	0	2947476	0	1	ND	ND	ND	ND	27	63	27	29	MALKSINISGNFDWCPFEEYKNYLICFNSHNLLYSNNGSLNNYTYLLDINLNSDIRSLDIVHKLNFEEALSRENNKSNKTSSNEYVTSFEWINCNNFVESENENELNKGIIIGGLTNGNIILLNAQNLFDTNCVNYDNFILSQSNIHESSINCLECNKHKNNLIATGGNDGQLFIIDIENIFSPTSYDPYLDKNNLQKITCLNWNKKVSHILATSSNNGNTIIWDLKIKKSAVSFRDPHSRTKTSSLCWLENQPTQILISYDDDKNPCLQLWDLRNSNYPIKEIIGHSKGINNICFSSIDSNLLLSSGKDVTKCWYLNSNNFDIYNEVNNSGNNIYSKWSPFIPDMFASSTNMDTIQINSINNGSKMTSKYIPTFYKKDASICFGFGGKICLFDNIKSD…
PBANKA_0827500	A0A509AP13	Glutamine-dependent NAD(+) synthetase, putative OS=Plasmodium berghei (strain Anka) OX=5823 GN=PBANKA_0827500 PE=4 SV=1	101.5	0	0	0	24935	0	0	0	0	0	0	0	0	0	0	264895	0	1	ND	ND	ND	ND	5	6	5	8	MKNSIGLSCCSIYSNPLDYEGNKLKIIESIKQCKSLNCSIRIGGELEITGVSCKNSFKGIEDIHENCWLTLSNILKEKYEGSNITDNILCFISMPIYFKKKLYSSEVIIYNSQIIYISPKENVENNEQSMYFSPYVGLKCEEDIELKNEGKNTIIFSNSNVNIISNHFEIFSLPKCIQNVTQQKETYIGKCIIEYEGVAIAHTFLDDLISIERNEIIDDRIDIFNKWDPDCNHSINYNVSENKKNISPFEKEYIKLTTTNKINLECIDVLLVNGYITNELELFKKYFSTLMNLTKKYPHLILCFSNNFGCDNYLYMFDGFSFIGKNEQILTKNGRYSFYEIQVASVKVEIENKQEDIKKEINSKICKNKIGKQISLLSINKHGKDTKEPIFAYNKDIPL…
PBANKA_1450700	A0A509AS81	Clustered-asparagine-rich protein, putative OS=Plasmodium berghei (strain Anka) OX=5823 GN=PBANKA_1450700 PE=4 SV=1	45.6	0	0	12305	0	0	0	108257	0	10530	20074	45308	0	0	0	2081165	0	1	ND	ND	ND	ND	12	29	12	46	MSSDILNATIDGVLNTKLHIQNIPPHITDSHLRSALGNAGQIKDICYFNKNKKQINNNFGNNKKIYNTALITFNTHEEALNVLKNIKNLIDTSSEERSIEAKFAVPNLNNNMINKNNMNGNMSNSNNNFQNNFNNENFGNNNMNNFNFYNNNSQNSFMNRNVRNKNTNNIMNINNMNTTQMNNMPMINQNNFMVNNNYKNNKNMNDMLGDDNITPKSANSNINNSGNNSPMFRQHNNNNNVNMHQGNDSALDEYNDNTEGLSLWEIYKDKNNNTFYYNNLTKHSQWNKPIHPNKLFQHNNNEKTKQNGPSGSNLFIFHIPSEWTDLDLFQHFCCFGNIISSKIQRDSTGRNSGFGFVSYDNVMSAHHAIQFMNGYFVNNKYLKVQLKKGEDAKEVQD
PBANKA_1462700	A0A509AWI6	THO complex subunit 2, putative OS=Plasmodium berghei (strain Anka) OX=5823 GN=PBANKA_1462700 PE=4 SV=1	260.9	0	0	0	0	0	0	0	0	0	0	0	0	0	0	145485	0	1	ND	ND	ND	ND	3	3	3	2	MDISNVLHNYRVRLFDEFEGKDIETNLNIIKQKYEDKLVSILKQVKYKTSLHKSCEKSCFCSKYQNDNYCPCSQINQKYQKNEINEENKNQDNLNSEKQTQVHITNESSDKKRKRNDNHNENYEKKNEGENIAEDNNKEEQIQNPLKRQNMNSGKIKDIHISDTIEFNEHKNETINNLNTFIKVDEDIKFLDSTDLFFNIPIKKDCILKDIFTKLTQEIKNKNYQNVYKYVYLECYKRNQNKIQEQGFCCNLQKNFKTIINFYFTSFVEQFSLFYFDFFLCIVKGIITIESGINYISNDLAPLHHEHSMKFNFPFFKINTDTNNMHDEKYNTNLDNTYLILPFKIVILNSFQYIFEIVHYLREKQNDLYTNYKDIIFQCIVMLEKKKIISYKDATTYIE…
PBANKA_1323200	A0A509ASD4	ENTH domain-containing protein OS=Plasmodium berghei (strain Anka) OX=5823 GN=PBANKA_1323200 PE=4 SV=1	97.4	0	0	0	0	0	0	0	0	0	0	0	0	0	0	274568	0	1	ND	ND	ND	ND	3	3	3	4	MNRLILNKATSSNDEPTPGYLYNEISQMTFCSKESLNMVGEYLLKKLQRTDLNVKLKTLKILKHLCDKKRSDFRNFLKKKIDIIKECQNCNIVHDQLKGDTPSMLVRKEATDLIKIIYSYETVENNIKTIPNSNQDNIVKNNRIEGFGNNVVQKDLSNYPRENNANYIYNNNISGNNNFYDLPNMKQQFNGKNMGYQSNSTFNNPNNYMNKMPGFGNPYFNQNPAQKTKSEIAIKYLNEVANKYIPSSFVNKINKVSTTISKNYSNGSLNIQNIIGGNSFNKNFEKGNMKYFDGRNSGWVSNNNNFNNNTKYYKNNNGKEKMKNPQESQESGLYENKIIDDVLNTTGINKVPCENVVNEFVQKCDTLDTKVIISIITSKLKTNFMDEESNWKYKIKVLH…
PBANKA_1408000	A0A509AR10	H/ACA ribonucleoprotein complex subunit OS=Plasmodium berghei (strain Anka) OX=5823 GN=PBANKA_1408000 PE=3 SV=1	23	0	0	0	0	0	0	0	0	0	0	0	0	0	0	421931	0	1	ND	ND	ND	ND	2	2	2	11	MGQFKHHKKNNFKKNYDNDFKMGKIILGGTYFKSCENDLVIKNSLENLVPYFNGRIFLENKEEIGKVEEVLGPINEFYFSVKLKEGILAKSFSSDTKFYIDESQTLPLSRFLPQDKSAEKKNPKKKKTNRDKKKNSNNNVNKNFNKQNKFGSGGKNRNDRNNWNNSGGNNFGGGNRNKGNSNFKNRSNSGRKFGNQRGRF
PBANKA_0407600	A0A509AD56	Asparagine synthetase [glutamine-hydrolyzing] OS=Plasmodium berghei (strain Anka) OX=5823 GN=PBANKA_0407600 PE=4 SV=1	66.3	0	0	0	124241	8205	21524	147907	191299	18424	37222	37671	10320	0	0	2611177	0	1	ND	ND	ND	ND	25	97	25	47	MCGILAIFHSSIETNRLRRKALRLSKILRHRGPDWNGIVVEENGDGTTNVLTHERLSIVDVLSGQQPLYDDKKEICLTINGEIYNHLELRKLVKQDILDALKSKSDCAIIPNLYKIYKEKLPCMLDGIFAGVISDKKYNTFFAFRDPIGICPLYIGYAADGSIWFASEFKALRIYCVRYVAFPPGHYYMCNNGKGEFVRYYNPNWWKLNSPIPNNKIDLEKIRITLENAVIKRLMGDVPFGVLLSGGLDSSIIASIISRHLKSIQTGTINNINGACVGKNNKNLNALKSFSIGLKDSPDLKAAKEVSDFLNTDHTEFHFTVDQGIDTLHDVIYHIETYDITTIRASTPMYILSRLIKSSCIKMVLSGEGSDEIFGGYLYFHKAPNAEEFHRELQRKIHD…
PBANKA_1134200	A0A509AMK2	Pyrroline-5-carboxylate reductase OS=Plasmodium berghei (strain Anka) OX=5823 GN=PBANKA_1134200 PE=3 SV=1	28.3	0	0	0	0	0	0	15198	0	0	0	0	0	0	0	1088534	0	1	ND	ND	ND	ND	8	12	8	33	MENIKLGFLGLGQMGLALANGISNSNIIKKENIYYYSPSKKNTDFVYMNSNAEVAKKCDIIICAVKPDMASYVLSDIKTYLASKLLISICGGLKIKSLEQVVGNDAKIVWVMPNTPCLVGEGTFIYCSNKNVDAQNKKYVNEIFNACGDAHEINEKHMDIGTAISGCGPAYVYLFIESLIDAGVKNGLNRDLSKKLVLQTLKGSVKMVKESDKPVQQLKDNICSPGGITAMGLYTLEKNGFKYGVMEAVDAAFQKSKSMS
PBANKA_0610400	A0A509AJJ3	Non-SERCA-type Ca2+ -transporting P-ATPase, putative OS=Plasmodium berghei (strain Anka) OX=5823 GN=PBANKA_0610400 PE=4 SV=1	167.8	0	0	0	289757	0	0	0	41097	0	0	0	0	0	0	352356	0	1	ND	ND	ND	ND	5	9	5	13	MSSEKQSVIPNRANIKGETNNNPNNKTNDALNSPVNNNSTIVENGQNTVVVNKNSVNTNIQNSKIGEKNVDEHSIPQKRRPSERERRSQKVERTQTEKVDAGRRRGEIDKIEKSKTENVDVYRKGEEIDKIEKSKTENVDVYRKGEEIDKIEKSKTENVDVYRKGEEIDKIEKSKTENVDVYRKGEEIDKIEKSKTENVDVYRKGEEIDKIEKSKTENVDVYRKGEEIDKIEKSKTENVDVYRKGEEIDKIEKSKTENVDVYRKGEEIDKIEKSKTENVGDEKKIETIVNKKKDGEETDNKGMLTKVKLEEENQLIESDVEKEKGEGYRNHYASESIEKLCKEFDLADINIGLSFEQVKINRERYGENHIEKDSITPIWLIFLSQYYSPVVMLLLIAAM…
PBANKA_0912200	A0A509AHZ2	Signal recognition particle subunit SRP72, putative OS=Plasmodium berghei (strain Anka) OX=5823 GN=PBANKA_0912200 PE=4 SV=1	95.8	0	0	0	0	0	0	13321	0	0	0	0	0	0	0	544632	0	1	ND	ND	ND	ND	6	7	6	11	MNHKNEKLKKKCSRKKDRNSISLEKKENKRRIRRINTKHVTNIYNKDQFTISEIKSRYSSLIEKKEYSKVIYEITNVLIKNNKINKSIGTTKKENKTFKYLFQEHYEEMKNDNVLLEFFYCLYKLKLYKKLNACLKYYLENEDQYNNFVNILLADVSYKLRNFETSINLYELLIKNEGENQVDSASINMDSSYISFYLQLMYEYNFLKIKKEKKKKKNNKISSSTTTENQISNKEENAQQNSNSQVGIQNIKEKIIEFTKNFNSEEVEDFEQLYNYSIFFAVEKCYENSLKFLNLLEDLCKNTLIMDEVNNNGNNSEINKLILEKNKTNKKESSLYNIEMIKKNKIFIQLGKAYIYSKMNKIKESVDIYESILNNYELYVNNLPVLLTSYNNYIALINN…
PBANKA_0212100	A0A509AJP9	Eukaryotic translation initiation factor 2 subunit 1 OS=Plasmodium berghei (strain Anka) OX=5823 GN=eIF2alpha PE=1 SV=1	37.4	0	0	49631	31118	0	0	139081	80843	56409	39302	21536	0	0	0	2432453	0	1	ND	ND	ND	ND	18	68	18	45	MGDARSKTDLGDCRFYEKKFPEVDDLIMVKVNRIEDMGAYVSILEYNDMEGMILMSELSKRRFRSVNKLIRVGRHEVVLVLRVDNQKGYIDLSKRRVSPKDIIKCEEHFSKSKKVHQTVRHVAQKHNMTVEELNRKVIWPLYKKYGHALDALKEATMNPDIIFKEMDISDAVKESLLSDIKLRLTPQALKLRGRIDVWCFGYEGIDAVKEALKKGKEISNNEVTINIKLIAPPQYVIVTSCHDKELGMQKIQEAMKVISDKIKEYKGGDFKQQGEILVIGGDDEKRLEELLDKHDGLSSDDEYSSDGDEDDSSNDDDNSSDEDDDD
PBANKA_0937200	A0A509AMJ8	RNA-binding protein, putative OS=Plasmodium berghei (strain Anka) OX=5823 GN=PBANKA_0937200.2 PE=4 SV=1	148.4	0	0	0	0	0	0	0	0	0	0	0	0	0	0	1001941	0	1	ND	ND	ND	ND	26	51	26	28	MSTIVESKMGIQEENGNQCDNNNNIDLNKENTKNKVNINENDTNINPDNNNDNSTNKTNTNNDNNDDEKKEKEENKSSNRWADMCEDFDSPLVDTYNDDNAMKNKTLDNNYSNGDVNNPKQNYFIPSKNDMNSYSNIYEIYVRNLHIDITKEEIYTMFEGYRIKRINILNKKGKTAAAYIEFDNAEDMNRSLELNGKMLYSGNNTFEHGTISVIINKDKTKAFNLNQKQNKFKKTANRNNNFGNVRQGNNVMNNYNNNNNNANNSGNNNMNGNNMFSLNNNSFFNDNNNNMRMGMKGGNDNINSSFNYNNMKQNYMNNQQGMNNNMNMNQSNNNMHNQNDNKNSNSNFSFKNMNYQNNKNANADNTTPEQTPATSEQRKKLVLKKRTVPLDQNSYVANP…
PBANKA_0524000	A0A509AHF2	Uncharacterized protein OS=Plasmodium berghei (strain Anka) OX=5823 GN=PBANKA_0524000 PE=4 SV=1	140.8	0	0	0	0	0	0	0	0	0	0	0	0	0	0	219868	0	1	ND	ND	ND	ND	2	2	2	2	MKKNPNDKKCVDQKSKLIDHNDHDETSNECAYINREDIDTNLINKKMCMLLKQYKIENIKKRKHFNLILLLKKKKKSLKKIRKNKKNILINDYLNILNSEKEYSNKYEQDKLFLNNIKRYDNNNNNNNELLNDGSYSIFFYNVFINGLYINKDSAKIIKSTDNQNLKKKNSINNNNDNYEELCQNYSNKTSNLKKKIFFFNGHQEILSIVDYFKILLNSLQNENITTKCFHFIEYAQMQENKEKHNIPYLQSYDIDNKKNEQSVISYGINLFTDKNLLNSNSIKDTVNILPNNNCENFQSHSTQNIGTYEDKNENPIKINDGNFNKILNTFMSELKAFFFSIISKVSLSKLIAKLIVIFSKVCLLLTPYYLNTTYFIEILTDFANIIPIKFIKYFVNFF…
PBANKA_0941200	A0A509AMN8	RNA-splicing ligase RtcB homolog OS=Plasmodium berghei (strain Anka) OX=5823 GN=PBANKA_0941200 PE=3 SV=1	56.3	0	0	0	0	0	0	0	0	0	0	0	0	0	0	394354	0	1	ND	ND	ND	ND	7	8	7	20	MMKHGKSEDVFKYIEKTNEKNLYRINKGLVPGMNVEGNIYVNEKLKLLIDEEIKMYQLNKCSTFLPAVIQIANVSTLPGIVKASIALPDVHAGYGFSIGNVAAFDMNNEKAVISPGGVGFDINCGVRLIRTNLFYNDIKDKQEELAQLLFNHIPVGVGSQGFILCNQNNLDDALSLGMDWSVKEGYSWIEDKLNCEDNGRSLYANSDYVSVRAKKRGITQMGTLGAGNHYAEIQIVDEIYNKKSAKLMGIEKKNQVCIMIHSGSRGLGHQIATDALIEMEKIMSKYKINVIDKQLACTPIHSPEGQNYLKAMGAACNFAWINRSSMTFLARQAFSKIFNQSPDDLDMHVIYDVSHNIAKIEEHFINGKVQNLLVHRKGSTRAFPPFHPLVPLDYQYCGQ…
PBANKA_0715700	A0A509AHW5	Lysine decarboxylase-like protein, putative OS=Plasmodium berghei (strain Anka) OX=5823 GN=PBANKA_0715700 PE=4 SV=1	40	0	0	0	0	0	0	0	0	0	0	0	0	0	0	452342	0	1	ND	ND	ND	ND	5	12	5	18	MELINEKDNNKINNILSNDAQLINDILKDNFQCDKEGRLVRILSEFSTVQDCLRNEGIFFTVVIFGSSRAVSYETYESNRIKYENQLKEFNEKQKDNIPLSDTEIKQYEQTKKDLDRLQKLKWSIKYYSQISELSKKLTLFFETQEGQEAVKNMSSQLPKTHHLFKNKNPETQESGEIKRSNKITVAVCTGGGPGFMEAANKGSKEANGKSLGFSITLPFEKGANQYVDENLSFKFHYFFTRKFWLVYLSLAFIIMPGGFGTLDELMEILTLKQCKRFKRHVPIILFGKEFWTSILNFDMLVEYGLISKDDVDSLFITDSIEEAYECVINFLKNSNPTTPKEVKDSS
PBANKA_0933600	A0A509AQ82	Dynein light chain Tctex-type, putative OS=Plasmodium berghei (strain Anka) OX=5823 GN=PBANKA_0933600 PE=4 SV=1	24	0	0	0	0	0	0	0	0	0	0	0	0	0	0	364050	0	1	ND	ND	ND	ND	2	2	2	12	MMEGIKKSTPPNMDINENEQNNKDENKVDMNGFCFFVNTCEEKLNEFLENYFCNKTHEELKYTEENQGANNCINNYSEKNNNTNVENNDSYISSHNASNNTIDNGDNSDNDSSNENEKNYYEKKIIKSNYDRIAINLVDTVEQFMEPYVNERYKIVVHAIIGENKKQGIHIASKSLWNVETDNYISAKYVNDFIFVTVMVFLLYNE
PBANKA_1206300	A0A509APZ9	Zinc finger protein, putative OS=Plasmodium berghei (strain Anka) OX=5823 GN=PBANKA_1206300 PE=4 SV=1	416.5	0	0	0	0	0	0	67330	0	0	44229	0	0	0	0	63478	0	1	ND	ND	ND	ND	2	3	2	1	MERGRPAGRRNNDLMSTWREGNSRNDSSDNHQFWSNIENQYFSNFDKRIITAFEDHIKCTDYICNKIKNKKIKKEIFQNIKCQKSSVKIKLNINDKKSEKKNGVANISQYMFQNNQFLNNNAFGQENLISQNNNQFLIDPKNDIRNYKTNRNPLFNDKQYMENVGHINNIENMISINNMDNRFRDYPTMFRNEACFIDCMPMAGNNLLLNTMHNNLKIEKNESNYPDDMSKNTNLPSIINTNEKNDINQTNLNHTDSSDNKNTNTQFGSTYTDVNIFNSSIDNSDKNIVITNLNTDHSNDLIQNDHTEKINSPNINDQTNVNDSNTENNVDITNNNELPKSNDNEYNGNSNDNNNVDAFGKFENDDNANGNEIDDLQNELEKNNTSVSNRSQNEASLFS…
PBANKA_0314200	A0A509AHB6	Calcium-dependent protein kinase 1 OS=Plasmodium berghei (strain Anka) OX=5823 GN=CDPK1 PE=2 SV=1	60.8	0	0	9495	51582	0	0	45370	21689	0	0	0	0	0	0	504486	0	1	ND	ND	ND	ND	5	11	5	12	MGCNQSKSANDVRGNKVNHVNSKKKNNKREDTNDGEEIAINPGMYVRKKEGKIGESYFKVRKLGSGAYGEVLLCKEKNGHSEKAIKVIKKSQFDKGRYSDDNKNIEKFHEEIYNEISLLKSLDHPNIIKLFDVFEDKKYFYLVTEFYEGGELFEQIINRHKFDECDAANIMKQILSGICYLHKHNIVHRDIKPENILLENKNSLLNIKIVDFGLSSFFSKDYKLRDRLGTAYYIAPEVLKKKYNEKCDVWSCGVIMYILLCGYPPFGGQNDQDIIKKVEKGKYYFDFNDWKNISDEAKELIKLMLTYDYNKRCTAEEALNSRWIKKYANNINKSDQKTLCGALSNMRKFEGSQKLAQAAILFIGSKLTTLEERKELTDIFKKLDKNGDGQLDKKELIEG…
PBANKA_0822700	A0A509AIU0	Ribosome production factor 1, putative OS=Plasmodium berghei (strain Anka) OX=5823 GN=PBANKA_0822700 PE=4 SV=1	39.7	0	0	0	0	0	0	0	0	0	0	0	0	0	0	272038	0	1	ND	ND	ND	ND	2	2	2	6	MKGKINKKEKKKLRYMTKDKQLTIGEIEKIDINKYNEISRFSVKNKNKKNALKGKAYLKKLILRKQKKEDIKNKKSLNIPVEKKIPRSIEQLALFDESKVNTENENFLLSEKYIDEFSDYFKNNKEPNIIITSIKRPSKNTILFMKELTLTFPHIFYEPRLDHTLDFLFKNAIQNNFSTFILIEEGIDKHPKYMFISTLPNGPTSKYSLTNIFYAHKKNTDIEITTLPPEVYITNFNTFIGERIKRQLHTLVPFTPNYKGQKVVVFYNQRDFIFFRHFKYNFVNKKKCSLYEIGPGFTLQLLSLKDGLINDKEKMYEFILRPDMKVNRKRMYL
PBANKA_1108000	A0A509ALR4	CFA20 domain-containing protein OS=Plasmodium berghei (strain Anka) OX=5823 GN=PBANKA_1108000 PE=4 SV=1	45.6	0	0	0	13470	0	0	0	0	0	0	0	0	0	0	319062	0	1	ND	ND	ND	ND	3	4	3	12	MYRDKYQPKILSLLLSAGSKPLEIWKMRTKKGCVRKVLDDSIKLSSIEILSENTSDSYIYTAPGKYNSLAISLPILVLIVKNMNKYFSFRISIMDNKRCRRTFRISNFQTVTRISNKWCTMPMVLNEGWNILQINLSDYTEKAFKTKYVETIELQINASIRIRCIYFCDRIYKNEELKDEFKIFSKKKEKIVYIPPQNLIKTLKKNTIKNAVKEKISKKENEQEYKDENNTSKPGKTKETSLNCAEEGASIINVPQTMMEINPTENKNKESESDFKREDDQNMQKNLEKENKTHDYMDMTEGLENYTDKVEDIDMIIKNDEDGHSLSKIIEPFDDEENNNTLDPNKTLLVEGNDNEADINNLTEIKNIEMDLNNVLYDDTNYDTYNNDDN
PBANKA_1032100	A0A509ALK9	Rhoptry-associated protein 1 OS=Plasmodium berghei (strain Anka) OX=5823 GN=PBANKA_1032100 PE=4 SV=1	70.6	0	0	0	0	0	0	0	0	0	19368	0	0	0	0	420242	0	1	ND	ND	ND	ND	6	7	6	17	MFIKIVSLFILSRLVFQDYSVAFNIRDSNIISNYSHGYNSPGINNDKLGNLNYFTEIFPKMSFLQEDDDVNQNKNGTSNKDSEKQDANSIADSDSLKDRDYALFNGNLIADLKEEEPIDETAEEETINENIDEKNTSTIKYTPDYTPRLKKAMHTLGYDKEFKLAELTTIQSCPNDNFLFDIFPQAIQKFQENDMKYIQTQGDQYVECIKKHKLVGSDNQDLKLNFGNSVNTFGPYKIPQKMITFDLIRLPSNITPVNLANDYYLSESEFPNLHKLNYCLLHPAKLEKLLKRKDIKSYINNTESGSYDNFFKKAMNESIECHVENTLHMILSKLTLFMFFNVNKPDSKNILKKQLYIIKSGLSYRSRKYVDNAYKKVINNFKDYENKIKLIDSNLENIT…
PBANKA_1117400	A0A509AMA8	Eukaryotic translation initiation factor 3 30 kDa subunit OS=Plasmodium berghei (strain Anka) OX=5823 GN=PBANKA_1117400 PE=4 SV=1	23.9	0	0	0	0	0	0	0	0	0	0	0	0	0	0	895884	0	1	ND	ND	ND	ND	3	5	3	23	MAIKTEVVDDWSEWLNDDEEEKREDFNTTIRNENDEIQKKILENNMDDIADFLNISDNPNKNKKTTKDNENKNLNKNKPQEKIVTLESTPLNSIKDCEHLGEILAFRIKKSNAKSVAIERFISIILQASEMKLGNKELISLNRKIQDMIDKKEKKQRESLVNKKKPNEVKNSIKNYKDEVDMIYGDISYDEEDYDDADEYLDGF
PBANKA_1126400	A0A509AP82	Transportin, putative OS=Plasmodium berghei (strain Anka) OX=5823 GN=PBANKA_1126400 PE=4 SV=1	133.9	0	0	0	0	0	0	21711	0	0	0	0	0	0	0	1591222	0	1	ND	ND	ND	ND	23	39	23	25	MHNTNFENNLYMGWKPNEKIYKTIIEALSSSCNNSNNNVQIEATKVLKDLNENVSDAALYLLHIFMDKQENSDVRQVGGLLLKNYINSKNKFLTNDILKIIKNEIFKLVEDEIKEIRSTSGSVITSILTKYEGIEKWPEALYNLLLLVERGNNDVVDGAFRAIIIIIEDELINRKNTDSLFFQFCKTQLLEKLFLYCSLQEKSIKKKYAAECLDLFINASCFATNGIFNEYFPQLWECLGYLAAEEDTQILKIVVTCVTIITDTRYASIFNNLDGIIQFMVNATNSGDRKVQLEALEFWPVLIKDRSYMAYSNYNNNNNSNNNKCIISSNIADGKPIGANTSENYIDENIYKNINELRNEALKTLKNYLPYLCKILIDNTVYTKWDYLTMDESHFQNDN…
PBANKA_1006700	A0A509AQS1	U4/U6 small nuclear ribonucleoprotein PRP31, putative OS=Plasmodium berghei (strain Anka) OX=5823 GN=PBANKA_1006700 PE=3 SV=1	58.9	0	0	0	0	0	0	0	0	0	0	0	0	0	0	265204	0	1	ND	ND	ND	ND	4	4	4	7	MATLADTLLKDLEDLEEENFNNNNDGIKKIKFEEQYEEDDYEEIVDAIEEFLNDKKKKCERKISELLYDEDFLKTMNHIKNYIIEEEAEKLKNEEGTKDTEDGDENEDNIKRKKAKYNSDDENPLNDNNPNDEEVLIEKCIELIIKIDTEILNIHKYLKDIYSTKFPELDSIVYTPLEYISVVSRIKNESDIKNIDFSDILPNTTVMAIVVASSMTTGIKLPDHLLKSCMSFCNEALELNENRQNILIYLENKMFLLAPNLTMLLGSALTARLISCVGSLKNLSVTSSQNLIVVGNSKKSILGLSNVNKTFGVGILSTSEIVQSVPDAYKKKAINLLAGKCSLASRIDYFKKYKEGQYGLLLREYVINHLIKLQEPPPMKQKKILPIPDEKKGRKRGGK…
PBANKA_1115200	A0A509AM20	HTH OST-type domain-containing protein OS=Plasmodium berghei (strain Anka) OX=5823 GN=PBANKA_1115200 PE=4 SV=1	132.8	0	0	0	0	0	0	0	0	0	0	0	0	0	0	1063336	0	1	ND	ND	ND	ND	27	38	27	34	MDTEPSSSLSGKNPSLLNVFTEKSDLGIQKNAEIENLNEQILSDNTNENLKNNSNDTDCENENIKKKKAGTTLNKIEENSNPTKNEKKTDTKTEENMAENTDKVGLNIQNDGNENIMLSSEENINNNGEVDQVCLEGEFENKIEKKHIQKYESKLNPIAPEFKPQNSLYIYQKIQQHTKRNIILLIKSFGYKGIKLEKISGEYCKKYNAVLNLAQAGFTNIYDILKSLNNCLIYEYEEKEGGYNNNEKKNDNEKEKENENKTDIPIAKNNEEIEKNLIIKYKTPKMNEDREFFVKIILGTIAEYTNYNPKLSNEETPLNNNLSLNKLPQEIKKIFGQAFNIKALQIRCGIYKLQTFLEDIQEIEIFSLSNDIKIRITPETYNSKIPQLKNIKKSMTSNE…
PBANKA_0517200	A0A509AEE6	Haloacid dehalogenase-like hydrolase, putative OS=Plasmodium berghei (strain Anka) OX=5823 GN=PBANKA_0517200 PE=4 SV=1	33.5	0	0	36831	75384	0	0	94969	0	21364	33583	27283	0	0	0	2167340	0	1	ND	ND	ND	ND	11	34	11	52	MSPEENNNMLVVRDTNGKPVDKHNLKNNIKIVFTDLDGTLLNDNSKASKLNIESLVKAKNKGIKIVFATGRPIFSANDVIGEDAKKNNLSLMPGIYLNGCITYGPNGDRIIDHYINENLIMDIYNFSKEHNLVKHIVWYSLEKTHTLEINEHIKEYMTVECIKPDIIDEETLKNTKIYKILISLNKHNLPNVLKIYQDKFSDQICVANTFKTYVELFHHNTNKFEGVKALCKYFNISLSDALVIGDGENDIEMLQGIETSIAVHNASSKIKQLANYVGPSNNDNALHHALRTFCNI
PBANKA_1036300	A0A509ALB7	RNA-binding protein, putative OS=Plasmodium berghei (strain Anka) OX=5823 GN=PBANKA_1036300 PE=4 SV=1	113.9	0	0	0	0	0	0	0	0	0	0	0	0	0	0	174486	0	1	ND	ND	ND	ND	2	2	2	2	MTKKYKNDSPIDKHKVFVRNIRENDVNELTERFEKECKKHFFFKNKTNSTKSAICIFHNEKDATNFITKYNNSKEFSTNIMCEFAIKKRHDEKILASILYNRNKIKYPNSIKIYTNCDIGNIIILNYLKNIYLIKKKLLLNCENNKSKSIYDKNQINKNSNNSNDEEIEIVASSENDKKFEEIVINIEKQSNINKNSILKKINNINFKDNKNDDSKNYFEYVVEFANFNLASTFYQFINKNEFQNYLKNNDENIDYENVFFFHELCLLNTEHKMVVLKNLNRKCHTENIQKLFKNIEKNLKINIPKKNDKKQGYAFVTFSNHKNVEKALLLTNTILCGNKIIIEKYNKEMKLFNGKFFQDNGITSTEPFSYYNSYNNENQETDKEDVDNKSGETDNSAD…
PBANKA_0522900	A0A509AGZ0	Pre-mRNA-splicing helicase BRR2, putative OS=Plasmodium berghei (strain Anka) OX=5823 GN=PBANKA_0522900 PE=4 SV=1	288	0	0	0	0	0	0	0	0	0	0	0	0	0	0	642496	0	1	ND	ND	ND	ND	18	19	18	10	MAEEYEKFKRFEYRMNSNLVLQREGPGPNQNEPTGESESLVGKLKYKMGDKVEYNKPVDFRKGKDRDGNEKNNKKRLDDDNEIYFEKKIKRIKNNSYIKEKSVLNINIDDIFLYKPSTKYTENIFSKILNIIRNIIGDNTGDIINSACNDVITILKNEDIQNNDSKKNEIEKVLEVNISDKHFIELDNLAKEIYDFDKKHDDQEIGDDEGVAVIFDETDNYFNYKNGKNKKIDNLMDDVGTNISELSAEDDESENDESENDESENDGSENDGNENDGSENDGSENDGSENDELVLKKKKKKKSETHLSLKNMNKDLNFSKNKESEEYEIDTNSIDPHWLQRKLNTIFNEASLCIEKEKEVLEILKIYDIQECENKLVNILMYENFSMVKLFMKNRWKIY…
PBANKA_1410300	A0A509ATR4	M1-family alanyl aminopeptidase, putative OS=Plasmodium berghei (strain Anka) OX=5823 GN=PBANKA_1410300 PE=3 SV=1	123.3	0	53701	129526	337555	0	23480	105606	88786	129113	42577	185709	21458	0	0	1962477	0	1	ND	ND	ND	ND	40	170	40	45	MVLKKLLCFNLFLIIILTFENLSFDKKNTCMINNTIRSNSCCIVNRVLREKTHHYSSKISKSIPFIQNFSLEKYFTGESLQKNILNNINKLGGAHLFHISKSHLTAKSGNKNTEFIGEATELFKGFKRNFGINMTENKQTNIGRMLCENDNNNGGEDTSTEKAIFKKSKDSQIHYRTDYKPSGFTIDNVTLNINIFDNETIVRSSLNMCTNENYADEDLVFDGVGLSIKEISINNNKLTEGEDYTYDNEFLTIFAKNVPKENFVFLSEVVIHPETNYALTGLYKSKDIIVSQCEATGFRRITFFIDRPDMMAKYDVTLTADKKKYPVLLSNGDKLNEFDIPGGRHGARFNDPHLKPCYLFAVVAGDLKHLSDNYVTKYTKKPVELYVYSEAKYVSKLKW…
PBANKA_0519700	A0A509AF46	Phosducin-like protein 2, putative OS=Plasmodium berghei (strain Anka) OX=5823 GN=PBANKA_0519700 PE=3 SV=1	24.9	0	0	0	0	0	0	0	0	0	0	0	0	0	0	361806	0	1	ND	ND	ND	ND	4	4	4	23	MNPKNKLIDICTSLTLEQAKEGITKECKLVKEQNKYPKDILSKNSLDQNVNAQNSNETDENSDEEEIRKWREKRLIQLKKRQELKKDGVYIDVIEKDFIPTVVKNACVVCHFYDNNFKRCHILHTHLIKLANIHLATKFIKVEAKNCLFFMNKLSIKALPSLCLFIDGVLIKTCIGFEDFGNKDEFKTKDLEVFLFKKNLIRNTEYNENDEED
PBANKA_1417900	A0A509AU54	Uncharacterized protein OS=Plasmodium berghei (strain Anka) OX=5823 GN=PBANKA_1417900 PE=4 SV=1	124.1	0	0	0	0	0	0	0	0	0	0	0	0	0	0	225140	0	1	ND	ND	ND	ND	2	2	2	3	MHIMENTAKKKSNDKKEKKKKNDIKEKILSGKAVLSFDEEIEFNKCCSIGANFVEDTNEIKKKNISDANNNPLKGTVLNKKKAQKKNEKEQIDNINKNYKDKSKKSCTLENKTSNNKSDNIEEANICNINNNDNSNQHIYKINEFESNLSKNNTYNLLDSSTNSSASPRICRNNNDLKKKNSIKIGKLENSNNIINIEEDNGEFNKWIELMPNINSQIETILKNQLPCYNILNNIKRINKIRNISFNENNEMLNSIEKSNLMFNSVNISSKEKYIIRFLCEGSICNLTELVDLLYYVLNNNELTYDMLPVKFELDNNTKMEKSDFLIINDIEKKNIKSNDCSPIVEIDKENKITDNNISPIENRNINMNNENDISIGNLSDDEYLFDDAENEKLPFNNI…
PBANKA_1407400	A0A509ARD3	mRNA-decapping enzyme 2, putative OS=Plasmodium berghei (strain Anka) OX=5823 GN=PBANKA_1407400 PE=3 SV=1	159.5	0	0	0	0	0	0	0	0	0	0	0	0	0	0	280535	0	1	ND	ND	ND	ND	5	5	5	4	MYMKKDSYKHYYKNVHKYSNNTGKSKKLFSAQRIKNLAKDKKLLDDALLDCYGRFIALLPEFLLKDHVHLYFQIQEAYWWYDDMWQDKYPDKLPKLSLKTFGYLICDDCPILKKYVPPSAHEKFSLNWRRYCRTIPLRGAILLNHNLKKCLLVKGWSTDNWSFPKGKIDELEEDSVCACREIYEEIGIDIFPYIDEQVYIETHIEDQPIKLFIIPGVKEDTQFQPKTRKEIGAIRWFEIEKIEKFFFYKNYKGKGYNLLFDNKKERINASVVCPFIPNLIKWIGILKKCINGKSLDENAYVSSSILSYRYQITGIDANIIKSLQKVDADSTEMIKTALPKSDDEYFDGYYDNSEYVAKDAKMMEYNNKEQTELSGKNENNYNEINDLLKTCMKSKDSNR…
PBANKA_1113000	A0A509ASB0	Purine nucleoside phosphorylase, putative OS=Plasmodium berghei (strain Anka) OX=5823 GN=PBANKA_1113000 PE=4 SV=1	27	28798	427706	757593	1203182	0	75420	857487	408949	377257	597360	504249	98905	0	0	16439008	0	1	ND	ND	ND	ND	22	349	22	82	MDEEQRHIKLSKKHATPVVLVVGDPGRVDKIKVLCDSYVDLAYNREYKSVECHYKGQKFLCVSHGVGSSGCAICFEELINIGAKVIIRAGSCGSLQPESIKRGDLCVCNAAVREDRVTHMMIHSDFPAVADYEVYSTLLKCAEELNVKVHNGISLSSDLYYPHSIIPTRLLDYSKANVAVVEMELSTLMVMGTLKKVKTGGIFIVDGCPLKWDEGDFDNVLAADRLENMIKISLEACAKLSKKY
PBANKA_1103100	A0A509ALW6	Actin-depolymerizing factor 1 OS=Plasmodium berghei (strain Anka) OX=5823 GN=PBANKA_1103100 PE=3 SV=1	14	0	0	0	0	0	0	0	0	0	0	0	0	0	0	428321	0	1	ND	ND	ND	ND	2	3	2	29	MISGIRVNDNCVTEFNNMKIRKTCRWIIFVIENCEIIIHSKGETTSLKDLVDSIDKNNNIQCAYVVFDAVNKIHFFMYARETSNSRDRMTYASSKQALLKKIEGVNVFTSVVESALDVADFK
PBANKA_0921600	A0A509AJS2	RNA-binding protein, putative OS=Plasmodium berghei (strain Anka) OX=5823 GN=PBANKA_0921600 PE=4 SV=1	85.2	0	0	0	0	0	0	0	0	0	0	0	0	0	0	308797	0	1	ND	ND	ND	ND	2	2	2	3	MVENGCSLLIRNLSFETSPDKVRKIFEHFGKIRDVYLPLDHYTRRPRGFGFVEYYDPKHAKEALNILNNSKIDGKEIRIIVAQNRRKSPDTMKKYHNNLNDSKYRSYKYENNNREKRRRISRYPSIDRSRDRSRDISRERYNRKGKKLKYYKKGSRSLSSYSISSSSTYSSYETASQSISKSYSSSENYNDYDKKKKKYMYTKKVNIKKGVNRETSSNYNTLSSENSRCSNNSDFNKCGGKDKTVNFLNKNKYIYNKMKKSNFNEKKYAKKHSFKSCFSGKSDEEIEKNQKGVKKKKNSSNISKSSNSFSVERHNLVNKKNCKNKDLSTNHELYENDSKEEFQEKKHFEEGKDGTSKKVKENEESHENALFNNDFKSSCSNNIISKNSKSSKNNNDDNE…
PBANKA_1129100	A0A509AL31	DNA-directed DNA polymerase OS=Plasmodium berghei (strain Anka) OX=5823 GN=PBANKA_1129100 PE=3 SV=1	334.1	0	0	0	0	0	0	0	0	0	0	0	0	0	0	331573	0	1	ND	ND	ND	ND	6	6	6	2	MALQTRTKGWEKDSKINADYEYEKLIKLENKFKIKTWIDKGEKEGYLYNIVPTTMSVLVKDSTKTQKKTGVHMYFVSDNNKTWRLTLFYRPYFYLKTKNIYNYESVSNFLKKELGKYNVEIEFVKKDDISLFDHLNKKRSYLNNIFFKLSFDTIENLVRSRSFLERIIERNKKSKDDNNDKHIFNDDELSYSKLEFSCKNDMYVKYDQGKNDKEKEQINSFTKNDYKNKDNYNNTETYTKQKWNKNTNNENANNEGNTLETSNNILNMNDIIVNMKKIILSKEEIMSEMVELYEYDVKYTTRLCIDKNIRCGLWYKVTRLEDEIYTEQIYFEVLKKEILAPLNVLAWDIECYKDELKFPDKEKDEIILISYMYNAQGYLIVNRNVMSKNIREFLYKPNN…
PBANKA_0926600	A0A509AJW5	ABC transporter F family member 2, putative OS=Plasmodium berghei (strain Anka) OX=5823 GN=PBANKA_0926600 PE=4 SV=1	90.1	0	0	0	0	0	0	0	0	0	0	0	0	0	0	350881	0	1	ND	ND	ND	ND	2	2	2	3	MKELLEDLFKIIELDEETENYLKERINDEKKKIVENGVDYFYDIICPFSDKKLKKNVIAEIYKKHVNDVIKVTNENKNDNNNEKLTKSLNLKEYWEKNDVIGYYDPFLGIQEKQVNYNTSIPISESIKINKEKQKQKEKQLSLFKEWVKNKIKIPSPVRVHNLLHCSDSNKSKTKIEKMNDIRIENFNLSIGQRNLLNDTTLKINVMNKYGLIGKNGIGKSTLLAKLARHEIEHIKEDISIACIEQDLFLEDVTVLECVLMVDKVRHDLLKELEELELAKKQSDTKNPNDTKCDNLKDNIDEKIINIYEKLNSINYLEAEKEASKILCGLGFDSNLQKKKVNSLSGGMRMRLCLSRILFSNNDIILLDEPTNHLDIYTIQFLIDYIQKLNKTCIIVSHD…
PBANKA_1018600	A0A509AMY2	60S ribosomal protein L21, putative OS=Plasmodium berghei (strain Anka) OX=5823 GN=PBANKA_1018600 PE=3 SV=1	18.7	0	47218	18025	0	0	0	31881	0	19037	24231	88016	0	0	0	2941437	0	1	ND	ND	ND	ND	7	34	7	48	MGGKSKGKRSGTRYKFSKGFRKHGECTANKYLEKINYGDYVDIVCDSSQQKGMPFNFYHGRTGKVFHITKRGVGVLVNKRVRHRIIQKKVCVRIEHIRKSRCNEDFILRKKKNQELIKQAKLKNEQISVKRKTEGPKPAAMIKVPPSKLITVEPLPFYEEY
PBANKA_1225800	A0A509ANN4	Peptidyl-prolyl cis-trans isomerase OS=Plasmodium berghei (strain Anka) OX=5823 GN=PBANKA_1225800 PE=3 SV=1	23.9	0	0	0	0	0	0	0	0	0	0	0	0	0	0	550644	0	1	ND	ND	ND	ND	2	2	2	10	MKSNSKDSENKKAENLILDDNDENTIIPYYLSNLLTNSSNPVVFMDINLGNNFLGKFKFELFQNIVPKTSENFRQFCTGEYKVNNLPVGYKNTIFHRVIKEFMIQGGDFINHNGSGSLSIYGEKFDDENFDIKHDKEGLLSMANSGPNTNGCQFFITTKKCEWLDGKNVVFGRIIDNDSLLLLKKIENVSVTPYIYKPKIPINIVECGEL
PBANKA_0927800	A0A509AIT0	tRNA nucleotidyltransferase, putative OS=Plasmodium berghei (strain Anka) OX=5823 GN=PBANKA_0927800 PE=3 SV=1	90.1	0	0	0	0	0	0	0	23793	0	0	0	0	0	0	384578	0	1	ND	ND	ND	ND	6	7	6	8	MNFFPVFILYITLIIIIICHKNKGNALSTFEKGFNKLQMFVRVKRNHHILKKKKNFLNYPKNVFYISPKTISNKNRNLNIIKFKRWIICDEKYNKQFKLFTAYNKMAYDNEYMFYLKKYIINEKELELSGTGNSIYQKEDDDDDDDNNKNDEQNNTNKYIYDIEKMIDKAITHRELELFEFLMKINETYKLNTTLRVVGGWVRDKFLNISNDDIDITVDNMKGSDFCNYIKEYIKDKENKNFNFGIIKINCDQSKHLETSSFNLFNFQVDIVNLRNEKYTEESRIPEISIGTVEEDALRRDFTINSLFYNLKNKKVEDYTKNGIYHLRNKIISTPLNPLTTFLDDPLRIIRCIRFCGYFDFNLDQSIFDVLKNVDIKKSFNKKISKSRLASEIIKIFSH…
PBANKA_1126200	A0A509AMC5	Protein DJ-1, putative OS=Plasmodium berghei (strain Anka) OX=5823 GN=PBANKA_1126200 PE=4 SV=1	20.7	0	0	58381	37290	0	12656	35695	57180	18728	25773	39141	0	0	0	2208331	0	1	ND	ND	ND	ND	9	30	9	56	MSMKKKALVVVASGSEDVEYITTVDILRRANIDVTTASIHETEKVQLQSKNTVFADTIIDKVKDYIFDVIIIPGGMKGSNAISDCQVVIEMLRDQKKNNRLYAAICAAPAIVLHRHSLIDDVEAVAYPSFESDFKHIGKGRVCVSKNCVTSLGPGTAVEFALKIVELLLDRESALRLASGFLLHPSITF
PBANKA_0315200	A0A509AHC8	Small nuclear ribonucleoprotein Sm D2 OS=Plasmodium berghei (strain Anka) OX=5823 GN=PBANKA_0315200 PE=3 SV=1	11.8	0	0	0	0	0	0	0	0	0	0	0	0	0	0	617077	0	1	ND	ND	ND	ND	2	3	2	19	MKTETPTEENRDNPENGPLGLLSECVKDNAQVLINCRNNRKLLGRVKAFDRHCNLLLTEVREIWVEVIKDKKKKKKINKDRYISILFLRGDSVILILRNPK
PBANKA_1223300	A0A509AQE9	Ras-related protein Rab-18, putative OS=Plasmodium berghei (strain Anka) OX=5823 GN=PBANKA_1223300 PE=4 SV=1	23.1	0	0	0	0	0	0	0	0	0	0	0	0	0	0	331828	0	1	ND	ND	ND	ND	2	2	2	9	MKNKNKYDYLLKLLLVGDSSVGKSSILCRYSDNQFEEKVLSTIGIDFKVKYLKIDNKTIKVGIWDTAGQERFRTLTSAYYRNAHAIILVYDCTVRESFENLDVWIHEIDKYSTNKNAIKMLVANKIDKPNHEVTKDEGKNFAFENNMLFCETSAKNDINITYCFEELIQQILNNPSLLELSVVTKNLKLGKKDEGRISCAC
PBANKA_1229100	A0A509ANQ9	Pre-mRNA-splicing factor CWF7, putative OS=Plasmodium berghei (strain Anka) OX=5823 GN=PBANKA_1229100 PE=4 SV=1	31.7	0	0	0	0	0	0	0	0	0	0	0	0	0	0	220941	0	1	ND	ND	ND	ND	2	2	2	11	METNANESNEENGDTINGPMENIENRNNDYTLNENTEEKKKKKKTEKLYKSIELHYLVNALPYIDSYDNELGQNAKKLIEEEMHIMKETNQVKQYLENFPIPDLLYLNNKNSIIQNELKRCEQNNKMTLLNFDHYNIENNSTSNINNNSTVNQAKKTFENHQLVLENLHNALINIELMNKYKEVIWSEHMKTFTQVDINLQNSIKSLKENIDNINKKRKLHHLSYVNDLTTLQNERKDFKRKNSLVLKEIKKLISENMLMKYKQNLI
PBANKA_1231000	A0A509AUT7	40S ribosomal protein S11, putative OS=Plasmodium berghei (strain Anka) OX=5823 GN=PBANKA_1231000 PE=3 SV=1	16.1	0	0	30159	0	0	0	97530	0	14656	87440	0	0	0	0	3081549	0	1	ND	ND	ND	ND	7	30	6	50	MASKKVKVPQPETAIVSGPQPKEGELVFGVAHIFASFNDTFIHVTDLSGRETLVRITGGMKVKADRDESSPYAAMMAAQDVAARLKELGVTAIHIKLRASGGTKSKTPGPGAQSALRALARSGLKIGRIEDVTPIPTDSTRKKSGRRGRRL
PBANKA_1001400	A0A509AMT4	Pre-mRNA-splicing factor CLF1, putative OS=Plasmodium berghei (strain Anka) OX=5823 GN=PBANKA_1001400 PE=4 SV=1	83.6	0	0	0	0	0	0	0	0	0	0	0	0	0	0	249235	0	1	ND	ND	ND	ND	3	3	3	5	MYTNSKNIQVKNKNAADVQITAEQLIKEALDFEEVEKKVNYNLIDEDELNEYKISKRKEFEDSIRKRRYLINTYIKYALWEIKQKDIKRCRSVFERALNIDYTNKNLWLKYIEVELTNKNINSARNLLERVVLLLPLENIFWKKYAHLEEILNNFVNARNIYERWVKWKIDETAFLCYINFEERCKEINKCREIFEQLIVNIPKLECFYRFIKFEKKYKNISRARACYEKCIELLPSQFLDQHFYIHFSKFEEENNEYERCRKIYIEALKRLPRENSDILYKNFLQFQKKYSEKEELDQTLLYNERIHFEEALKKTPNDYDIWFNYIKLEEQNINLINKEKSIIRIRELYERAISIIPQIFTKKYWKRYIYLWINYSVFEELYADNIDRARQVYSNIFK…
PBANKA_1137000	A0A509AMN1	Bergheilysin OS=Plasmodium berghei (strain Anka) OX=5823 GN=PBANKA_1137000 PE=4 SV=1	133.4	0	0	14585	77246	0	0	0	0	0	0	0	0	0	0	1123086	0	1	ND	ND	ND	ND	19	44	19	24	MKLMKVLGYINIITNCVNGILCKGDKKRYSIFTNNYIYSISTLNNYSFAATMNKMPAWVNEKCPEHKSYDIVEKRYNENLNLTYTVYEHKKAKTQVIALGSNDPLDAEQAFGFYVKTLTHSDKGIPHILEHTVLSGSKNFNYKDSMGLLEKGTLNTHLNAYTFNDRTIYMAGSMNNRDFFNIMAVYMDSVFQPNVLENKFIFQTEGWTYEVEKLKEEEKNLDIPKIKDYKVSFNGIVYNEMKGAFSNPLQDLYYEVMRNMFPDNVHSNISGGDPKEIPNLSYEEFKEFYYKNYNPKKIKVFFFSKNNPTELLNFVDNYLCQLDFTKYRDDAVEHVNYQEYRKGPFYIKKKFADHSEEKENLASVSWLLNPKKHKNSDTDLSLESPTDYFALLIINNLLT…
PBANKA_1025200	A0A509AN18	H/ACA ribonucleoprotein complex subunit 4, putative OS=Plasmodium berghei (strain Anka) OX=5823 GN=PBANKA_1025200 PE=3 SV=1	51.4	0	0	0	0	0	0	87125	0	0	0	0	0	0	0	2334865	0	1	ND	ND	ND	ND	11	30	11	36	MEKVEYKIEPEKKEATIDASNWPLLLKNYDKLNIRSSHFTPLPMGNSPYSRNLKEYLKYGIINLDKPSNPSSHEVVSWIRKILRCEKTGHSGTLDPKVTGVLLVCLNRATRLVKSQQESGKEYVCVCKFHSKPKSIEEVKLVLNNFQGAIFQRPPLICAVKRQLRVRTIYESKLLDYDDTNNLCVFWVRCQAGTYIRTLCEHIGLLLGVGAHMQELRRVKSGNMTEYDNMCTLHDIMDAQYIYDTTGDETYLRKIITPLEKLLINFPRIVIKDSAVNAICYGAKLTIPGVLRFDNNIDVYSEIVLMTTKGEAVALAIAQMTSTVIATVDHGIVALTKRVIMDRDTYDVKWGFGNRSMEKKKLILAGLLDKYGKPNEKTPISWIKSEGYAPKIVGNTSSY…
PBANKA_0416800	A0A509AHY2	Ubiquitin specific protease, putative OS=Plasmodium berghei (strain Anka) OX=5823 GN=PBANKA_0416800 PE=4 SV=1	161.4	0	0	0	0	0	0	0	0	0	0	0	0	0	0	246464	0	1	ND	ND	ND	ND	2	2	2	2	MIKSENIPIDNINYNLKIEENDDDNKKPKKVCELINCNDKNMINYIYKDIVSEENEYDLPNINKFNNYNNEDNTNYDINKDKTIMNILDMNKRVQIHNNMNKSDANYEIYIEENNGVITELINPEISKKESLHNIVPRPQTYNNNKKENLTKTKLEIPETHLKNSKNTILIKKTNQKLYPTQENILNEINKGNNVNNGYEQTTLNNKILENTPQGNTEILDENQIIYNSKKNDKKVETDLFLNDENNYLHIFKNYKTYQILKVLNIIAKEHIYTKSYHSDNYAKKFGKTSNIKLNDLISYNDLGINNEQIQINIMENEDDPKDNIIDNYKISNNRMPILKSMNKNEKLIYLSLLKNVDKHILQSINKNIFFLKRIQQYFYRKYIHIKFPNDLDNYYYFI…
PBANKA_1103000	A0A509ALL4	Serine/arginine-rich splicing factor 12, putative OS=Plasmodium berghei (strain Anka) OX=5823 GN=PBANKA_1103000 PE=4 SV=1	38.1	0	0	0	0	0	0	67506	0	0	0	0	0	0	0	1280146	0	1	ND	ND	ND	ND	5	8	5	20	MGPHSSQRPQPMSLLIRKLKFNTSPSMVRDKFKKFGAIKDVYLPIDYYTKEPRGFGFVEFYDPKDAEQALKEMNGSELDGNRIEVFVAQKGRSDPRIMRYKERGGGSGYGHRKYSDNRLKRRYISKSNSRYGSYSRDKIRRRDKSRERIRYRDSYERNMRSSYKDKKNNYMKNYNRYRSRNYDRSFSRGRRSRGYRHDSPKYREKRRYNRSISRSENKNNRKEYKSKYSNDKYSNDKYSNDKYSNDRYSNESGNSSKQSRKQMVSKSISFNTEKDDEKRKNDNIEDRGNSKEWKESKDIDKHVDNKNSVNSQDAESN
PBANKA_1020400	A0A509AJJ4	Nucleolar GTP-binding protein 2 OS=Plasmodium berghei (strain Anka) OX=5823 GN=PBANKA_1020400 PE=3 SV=1	58.9	0	0	0	0	0	0	0	0	0	0	0	0	0	0	186850	0	1	ND	ND	ND	ND	2	2	2	4	MIKKGSLKLGSTRLAKSSVSNVKMDNRAINKEKEKRKTKEKLNRLKMYRTKADLKKMNAKINEVRRIEPSIKWFNNTRTISQNKLEIFRNKLEEHTNDPFSVVIKRSKLPMELLKDEKDCVTKKYKNDNFLKIENYNDIYSKKKKRKKPKLNFESLEEYANNAQQKLLNYETDKDNSLVHKKTNVEKKYIKDHLLKIGQSKRIWTELYKVIDSSDIILEVLDARDPIGTRCKKLEENLKKDRAHKHIILILNKVDLIPTSVAEKWIKILSKEYPTIAYHASINNPFGKSDLFNIIRQYSQFFKNMKKKHIHIGLIGYPNVGKSAVINSLKKKVVCISACIPGQTKYWQFIKLTNKIYLIDCPGIVPYDIEDSDKILRCTMRLEKITNPHYYIDDIFKMV…
PBANKA_1354400	A0A509ASX0	60S ribosomal protein L18a OS=Plasmodium berghei (strain Anka) OX=5823 GN=PBANKA_1354400 PE=3 SV=1	21.7	0	0	64274	0	0	0	112917	0	18183	0	64013	0	0	0	5367744	0	1	ND	ND	ND	ND	10	52	10	47	MDNIKDKSLKINIFQYHVVGRATPTDKNPNPNVYRMCIFAKNDTNAKSRFWYFMKKIHKLKKSNGELLACEQIREKNPLRAKTYGVLLRYDSRTGTHNMYKEFRDTTKEGAIAQLYSEMAGRHRARASSINIIRISEISMQHAKRPHIKQLLKKRLRFPALHLPTLAKEYKRKYAPTRPSTYRM
PBANKA_1360100	A0A509AYF4	Nucleoside transporter 1 OS=Plasmodium berghei (strain Anka) OX=5823 GN=PBANKA_1360100 PE=3 SV=1	46	0	0	0	0	0	0	0	0	0	0	0	0	0	0	521217	0	1	ND	ND	ND	ND	2	2	2	6	MSKIKESSSGILGASNNTNKESSQKSARSIALPMTYALIGVSCLNVWNSALGLNIKITYNIFQMAGLLTSSVLALFVNYPRVLLPTSLGVLTLLCAGFQIAHQTFSDSAFDTYCLAAFITIGLMAGIAQTIAFAIGTTKESNMSGYISAGIGMSGVLIFCINLILDYIVSDEKIYEINKSKLLCLFSISEIFLIITIVCCVLYIDLFPKNDNNKDSTDIEKAEEKEGRLPLIEIIKDGYKAILSIFLVNWLSLQLFPGIGHKKWQEKHGMTDNNVTIIVGMFQVFDFISRYPPNFTHIKIFKYFTFSLNTLLIGNFLRLLFIPWFVLNAVISSSFFTNIVQQCVCIAALAFTNGWFNTVPFIVFVKELKKVKHQKDIETISRIMVVSLFFGLFFGMLTT…
PBANKA_0712100	A0A509AHF5	DNA helicase, putative OS=Plasmodium berghei (strain Anka) OX=5823 GN=PBANKA_0712100 PE=4 SV=1	120.7	0	0	0	0	0	0	0	0	0	0	0	0	0	0	233983	0	1	ND	ND	ND	ND	4	4	4	5	MDVCEFIDPIRKRKITNNLIDFDKYVYKEKSDKCEEKQSNEYVIKKKKKKKKLKRVLDSSDSDNSDKENIKKEYKNECEKNKKNNDEFLCKSYDNSITNDNEIEEKKEYERNLKKLYNCLLGSVKIKNKIIKYFTQNAIEKRQDIIKEFVKGSFRINNYDANFEDFEKNVDTFHKLKKYQKCGVYWLYILYKEKKNGILADEMGLGKTAQTCVFLDYMYKTNKLQNKTIIVTPTSLLKNWDNEIDMWCPYLKNHKIIYYGNQNERKYLAYDIFTNKKKDNNNNNNNAIHLIITSINMLTGKNDAAYFRQIRKYDYLIFDEAHFLKNKNSLIYKKLQKKIIFSNKILLTGSPIQNKTQELTNLLLFLMPHIFTEHNINSAMNAFLKLYQEIIEKKNKFDN…
PBANKA_1306200	A0A509ARF0	tRNA import protein tRIP OS=Plasmodium berghei (strain Anka) OX=5823 GN=PBANKA_1306200 PE=4 SV=1	46.1	0	16016	19162	744527	0	18178	125012	273537	0	172832	65723	0	0	0	2867942	0	1	ND	ND	ND	ND	14	89	14	42	MCTLNLVENDIKSDILKLALDFIKTNIVENDDNVVFPEIKYGQKISYEHNKKTYKEFFCSLYAIIDTYNCYSQFFCENEDKVSESEEFIFNLASDKFKLKPLDMKHLNDILRERSYIVSDKHASLVDIFYFCCVYKILKPMTAKEKVEYYHICRWYIHLQETLICDFVKLHKLDIRSGVESLLNSGIVTCTNEKASNEQVGSKIDKANKKNSDSKDNNGKNKKKSNNAENKDAEDSRSLDDISRLNIVVGYVESVEIHSGADTLYCLKVNVGENQLRDICSGLRNKKNPEDLLNKYVLVLANLKEKSLRGRKSFGMILCGSFEERVELLTPPPGVKIGERITFENMNTNSLPDKTLSSVKEKNAFFLIQPNLVINNGVAFYKNNKWLSSQGEITCMIEH…
PBANKA_1409600	A0A509AQ48	Meiosis-specific nuclear structural protein 1 OS=Plasmodium berghei (strain Anka) OX=5823 GN=PBANKA_1409600 PE=3 SV=1	59.5	0	0	0	0	0	0	86186	0	0	0	0	0	0	0	2258618	0	1	ND	ND	ND	ND	23	43	23	39	MKRYNEKNINARIQREQQNEYARERIRADMKLDNYSRIQGISIDKNEATQNKKNAEELIKENYVEANEYSSKREDDYAMSVNFDSEKIKEERTKKCQLLNKKQKEEKEIADKILREKALQHALQNDEGYKRLKGKLDEIATLKVRENQIKDAQILKIREKEEEENRIGEQMEKILKKEENDDERKKQINQEKIMETKKELQYQINENSKKKKEKYYKNLKERSNMDNIVKSYQEEERKKKEEGIIKQKKLLKEFQEQIELKNKKKELEKKNELNEELKNNEYIKERENQMKNFHKKKEEKSIEKQKVVNELAHKEYLVHKEKENIDELLNKLYIDEHDFKEKQKEIQENEKKLQLKNEMLKQLEKDVKLKEEKRQHEREEDEQRKIEILEEKKKLDKID…
PBANKA_1441400	A0A509AR08	Proliferating cell nuclear antigen OS=Plasmodium berghei (strain Anka) OX=5823 GN=PBANKA_1441400 PE=3 SV=1	30.3	0	0	0	0	0	0	34215	0	52277	43188	0	0	0	0	846853	0	1	ND	ND	ND	ND	6	11	6	37	MFECRIDGQFFKKLFETLKDICTEVNLECDENGIKMQSMDCSHVSLVDLNIMSDFFQHYRCDKKCVLGISINFMLKILSVIKEKSTVFLFKEDNENDAVLNIGIIDEEEQSSTEDSLEIQVKLINTQKEHLEIPQSEYHCQCTMKSKKFQEFTKYLNSIGDNVSISMKKDTMILSTTGSDIKVTKQFTNDMPDVSITCSKYVSQEFATRYLVMFSRASALSDEVLISLSPNIPVSIKFNFKQQLTELPDNSHLTFFLAPKIGEY
PBANKA_0708100	A0A509AMN4	Dynein light chain 1 OS=Plasmodium berghei (strain Anka) OX=5823 GN=PBANKA_0708100 PE=4 SV=1	22.9	0	0	0	0	0	0	0	0	0	0	0	0	0	0	177838	0	1	ND	ND	ND	ND	2	2	2	11	MNRTVVKEVTISQCIKNWEQKTGKKISEEENVSFICNIPLIEKLDQSINTLEKCKRLSLSTNRIEKFVPMSGLKNIEILSIGRNCIKKLQFLEDISGTLKQLWISYNNIDKLDNLQSLKNLQVLYLFHNKIKGLEEIDKLNTLPELIELGLKGNPIYEGRTNEYMKLVILKKLPQLKVVDNETITENQRNDSLTIEVV
PBANKA_1008000	A0A509AKY1	Hsp70 nucleotide exchange factor FES1 OS=Plasmodium berghei (strain Anka) OX=5823 GN=PBANKA_1008000 PE=4 SV=1	35.5	0	0	0	0	0	0	29743	0	0	0	0	0	0	0	806748	0	1	ND	ND	ND	ND	2	4	2	8	MVSINWPGLLKWSTKYSDGTVDTNKRLSKEDIEFLQGAIKEALSQVEDPYEAIGEAVRNFESKDEGIILASAKIIERLVDEYPEVAKNLDKINALDPLLKLLESNNNHILESVLQIFSLALSNNPVLQDCVFKKNGLKILLLKLQESKQTTVDKKLITAISALIRHHDEGENKFIDYGGIAFLVYGMQTNIYKYQEKSALLLKHLIHQNKITFETFEKNKVMNGLIALANNKNIDETGIQYGETTAELFLALMQNHRHKLAKVGYLKQLKELIEGRLNYLTVIQDNASYDVSQEIDLFKDCLKLTKWPGVKQ
PBANKA_1318400	A0A509APU2	6-phosphogluconate dehydrogenase, decarboxylating OS=Plasmodium berghei (strain Anka) OX=5823 GN=PBANKA_1318400 PE=3 SV=1	53.3	0	98102	0	126497	0	121038	346427	258922	0	146008	44460	0	0	0	9061979	0	1	ND	ND	ND	ND	21	141	21	59	MTDGCDIGLIGLAVMGQNLSMNIASNGFKIGVYNRTYERTTETLKRAKEENLVIYGYKTLEELINNLKKPRKIILLIKAGPAVDENINNILKYYEKGDIIIDGGNEWYLNSEKRIKICAEKNVEYLAMGVSGGEAGARYGCSFMPGGSKYAYEHVEEILKKCSAKVNTSPCVTYIGPGSSGNYVKMVHNGIEYGDMQLISESYFIMKHILKYDNKKLAGVFKKWNEGILNSYLIEITSKILDKKDNLTDNYLVDVILDIAGAKGTGKWTMLESIERGIPCPTICAALDARNLSAYKELRINANNNFSNEIKINNTNEDLTNFENDLLNALYCCKIISYTQGLFLLKQVSKEMNWNLNLGEISRIWRGGCIIRAIFLDRITNAYKNNNALELLFMDKEFS…
PBANKA_1125500	A0A509AM41	ATPase, putative OS=Plasmodium berghei (strain Anka) OX=5823 GN=PBANKA_1125500 PE=3 SV=1	43.1	0	0	0	0	0	0	20118	0	0	0	0	0	0	0	841234	0	1	ND	ND	ND	ND	7	12	7	29	MKLLTSKYPKISKDIFQRNNIILRKKNETSNFKKLLCRSFIFYSAMQKVIGTHSGRFHTDEILASVMLKFLPEYKDAKIIRTRDQELLDKCDIVVDVGGIYDHEKKRYDHHQREFNDGLDENHNIRLSSAGLIYKHYGKDVLRKGFNITDENKVNILYDKIYTVLIESIDALDNGINQYEGEAKYQINTTLQHRVNRFNPNFLEDDIDENERFMLASNVVKDEFSSFVNYYSNVWYEAKTITLEAVKNRYNFHKSGRVIFLQKHCPYSDHIYNIEKELNIKDQILFCIYKDRYNNCRCGTISKENEGFNIRLPFPPSFRGLKNEALVKESNIEGLTFVHYSGFTSAGDNIECLVKLVEATLKENGISY
PBANKA_0712900	A0A509AK87	High mobility group protein B2 OS=Plasmodium berghei (strain Anka) OX=5823 GN=PBANKA_0712900 PE=4 SV=1	11.5	0	0	0	0	0	0	0	0	0	0	0	0	0	0	402768	0	1	ND	ND	ND	ND	3	4	3	37	MATKTQKKVIKKQNKKKKKDPLAPKRALSAYMFYVKDKRLEIIQERPELAKEVAQVGKLIGEAWGQLTPAQKAPYEKKAELDKVRYSKEIEEYRKTKE
PBANKA_1301700	A0A509API9	Splicing factor 3A subunit 1, putative OS=Plasmodium berghei (strain Anka) OX=5823 GN=PBANKA_1301700 PE=4 SV=1	70.9	0	0	0	0	0	0	0	0	0	0	0	0	0	0	372151	0	1	ND	ND	ND	ND	6	7	6	15	MAKVIVKGSIFDDNVDVTDLELVNKRLEFLENEMIIPPNSIKSVIDKTAAFVKKNGKVFEQKIYKEKEKQFNFINSTHPYFFYYQYKLHEQFLGIQEKNTIPKAILEIKKREDLNKSSNNEHILKICDFVKEDIKKEKNKIIYSIDDQTKDEDTQEQQIEIKEDIYTIISPLISSVDVDLMKTTALFVARNGNKFLNELIEREKNNSQYDFLRANNLYYNFFSKLIDIYVKCLLPNNDIIDKIKKYSNNKRDVLNYSYSIYNHNMKKREEEERKLEEKTKCDTFYDWTNFTVVENITFDDNIEALPQSIDFNNVENYVLNQLFDTDKKYTNIEKINNISYHTSNINKEIHENGEIGEGQAHGDDSMDKYERKNEYSDDAIEIRKLEENPVDMSQEENNV…
PBANKA_0943600	A0A509AJ86	60S acidic ribosomal protein P1, putative OS=Plasmodium berghei (strain Anka) OX=5823 GN=PBANKA_0943600 PE=3 SV=1	12.9	0	0	0	0	0	0	0	0	0	0	0	0	0	0	2839032	0	1	ND	ND	ND	ND	8	11	8	84	MAAVPVAELPECEKQELLCTYAALILHEEKMSITNENIVKLIKKSNNTVLPYLPMLFEKALKGKDIEGLLSNLSVGGGAPAASAQVATETADDGKKDSKKEEKVEEEEEEDDLGFSLFG
PBANKA_0917500	A0A509APU6	Structural maintenance of chromosomes protein 1, putative OS=Plasmodium berghei (strain Anka) OX=5823 GN=PBANKA_0917500 PE=4 SV=1	192.3	0	0	0	0	0	0	0	0	0	0	0	0	0	0	297194	0	1	ND	ND	ND	ND	8	9	8	6	MAKKNKKKIDESSRNDEEYKSERSVDTEENKNSKINGLKINSEKVLDQDFNSFINNEFLDISVSPSLDLSQSNIMSIKHGKYNNYLNDFNLTNKTYENINENDDINYNNANSYIQSKQMNKKNKLDVDTQSETIENNNFEKNKNKNENSEGYSTDASNNEGQKNEKKKCLNNEYQKEMSKTFVEKNGEEISRIEMGVENQSENVNGSNSMMYNKKYNNEYTNISKINDLSLPNNYLSNSIASSMITSKESELCFIKYLTVCNFKSYENENIIGPFSKFTAIIGPNGSGKSNIMDCICFVLGIDNKYLRIKNLRKLIYHKENEKIENISKRICYVKLTIESNSKETVELKRTLNYRGVSNFYINERLVNQDEYTNFLRRNRIETKTKTCLIFQGDIEEII…
PBANKA_1431500	A0A509ASX8	Radial spoke head protein 9, putative OS=Plasmodium berghei (strain Anka) OX=5823 GN=PBANKA_1431500 PE=4 SV=1	42.1	0	0	0	0	0	0	0	0	0	0	0	0	0	0	995066	0	1	ND	ND	ND	ND	6	7	6	25	MINLKNLDFHLGNLTESNRCLNHEEKLGVVFGMTNLEEEVKKEIYFWGKIEGIENDYYIAYHFKDDDFFPKKVFYYCNDDYKFHDLIKGNDNLIEKLERKMPFTLFNGIPNSFYSKGSICKRKENDNNNDKYTDETETDDENSESKKSENESDEENNDESNGESGEGSEQSWNDNNLVSDSPENDKHEYKNKGINDNDINNSNNNRNHKNKSERKNDIIELERLSYVIRKIDNETFIIPHDSIKITNNMEMKFSNFSGLNIIDALKLTSWVHFRYPKNLTSDKIKNYNTFFLNNFLDTIKSDIPSNAWNIKINKELNKISIINFLYPGYTFYHTLNTPFYASIYIGNGLPNHDLPFLLP
PBANKA_1403800	A0A509ARV0	Translational activator GCN1, putative OS=Plasmodium berghei (strain Anka) OX=5823 GN=PBANKA_1403800 PE=4 SV=1	394.6	0	0	0	0	0	0	0	0	0	0	0	0	0	0	527875	0	1	ND	ND	ND	ND	15	17	15	6	MEKERTDIEEIFNFIYFKDKIKRDKFEYYKDEIKSILSNNNEEEIVELVNLLFFTKDINYIKNNLSICLHLLSKVINELDNENLKNNLYIYVLKRINSKIHFIDNFNKALVCKKIFFFCSEYENLLKDIKELTSFNNLFISCFEFLDNLFYSNDKLEELNTKYRLIKKNIIKQLIRIFVNIGKNDDIENDSKGVYKLGGDEELLEGADKRFNNFLQLCNCSTNGKGIYYIVVEAFGQFLNRYNNSYNYINDNKRYIKILSQGFINLLNSNKEILLKINKSFKYIFQAWSDENIFGTILNNYHRYDEVALKNASAFYYYCELYNKDHLNNLLEIVINLKKNKNLDNCDILYFIIFYKFHINNDNDTILKKMFENSVKLNLVKFNEKIIFLKSIKYLLSME…
PBANKA_1237800	A0A509ANP8	Multidrug resistance protein 1, putative OS=Plasmodium berghei (strain Anka) OX=5823 GN=PBANKA_1237800 PE=4 SV=1	160.8	0	27033	47374	234539	0	5523	26443	29720	0	22059	43482	0	0	0	246099	0	1	ND	ND	ND	ND	13	34	13	15	MAEEKSNNNSIKHEVEKELNKKSTVELFKKIKSQKIPLFLPFHSLPSKYKKLLVVSFICATISGASLPIFISVFGVTMANLNIGESVNDTVLKLIIVGICQFILSSISSLCMDVVTTKILRTLKLKYLKSVFHQDGEFHDNNPGSKLTSDLDFYLEQVNAGIGTKFITIFTYSSSFLGLYFWSLYKNVRLTLCITCVFPVIYICSSICNKRVRLNKKTSLLYNNNTMSIIEEAIVGIKTVASYCGESVILKKFKLSEQFYSKYMLKANFMESLHIGLINGFILASYALGFWYGTRIIIHDIKTLNYGSGFNGSAVISILLGVLISMFMLTIILPNVAEYMKSLEATNNIYEVINRKPAVDRNQNKGKKLDDIKKIEFKNVKFHYGTRKDVEIYKDLNFT…
PBANKA_1222800	A0A509ANK4	tyrosine--tRNA ligase OS=Plasmodium berghei (strain Anka) OX=5823 GN=PBANKA_1222800 PE=3 SV=1	43.3	0	0	0	0	0	0	23112	21237	0	0	0	0	0	0	544888	0	1	ND	ND	ND	ND	7	12	7	25	METINIKKEDNEAEVKISQEIHDENVEKRYNEIMSIASECIQPEELKLKLLQKRKLICYDGFEPSGRMHIAQGLLKSHIVNTLTNNGCTFIFWIADWFAQLNNKMSGDLNKIKKVGQYFIEVWKSCGMNMENVQFMWASDEINKNPDKYWSTVIDISRSFNINRIKRCLTIMGRTEGEDNYCSQILYPCMQCADIFFLNVDICQLGIDQRKVNMLAREYCDIKKIKKKPVILSHGMLPGLLEGQEKMSKSDENSAIFMDDNEADVNRKIKKGYCPPNIIENNPIFAYAKIIIYPHYKEFNLIRKEKNGGDKLYTTIEEMEKDYICGDIHPLDLKDNVASYINKMLQPVRNHFQNNAEAKKLLSEIKKYKITK
PBANKA_1336700	A0A509ANU4	ERYTHROCYTE MEMBRANE PROTEIN PFEMP3 OS=Plasmodium berghei (strain Anka) OX=5823 GN=PBANKA_1336700 PE=4 SV=1	69.8	0	0	0	0	0	0	0	0	0	0	0	0	0	0	282078	0	1	ND	ND	ND	ND	4	4	4	8	MFPNNGFNEGINQLNSYQNNNRNPYENNNENFYQNPGNIMQGGYNNGLVNNMYGNDFMNKNMNNYNNDIFGNSMNNMPNMNNSQNQNNLYFSNKNDNINFPNQKPLFTQIKQNVSIFGNKPKNTPLFANNNIIGESKFNRPNQTSNFRFNDFVGKDKSIFGNRIKEGKSLFRNSNNMNYGNNINYAGIENSAPNNNINPLNNQNNNYVNYNCDSRVIPQNVINPCNYNDPMAKNMNFMMNVQNNKMNNIPYMNYNMNGNSSVVGNFNIGENNSSISGINNSSYNMQPHLNSGDNTMNVGSFNNMNTAYNIYDIGGKNPNIINYPQFSSQSDLNMNNKFINNNVGNMQHYQNILQNNNVNNAGNFGLNNFNLLGSHNNILNSGIVHDNNKNPMEQNYNFN…
PBANKA_0514100	A0A509AGC5	Pre-mRNA-splicing factor ATP-dependent RNA helicase PRP22, putative OS=Plasmodium berghei (strain Anka) OX=5823 GN=PBANKA_0514100 PE=4 SV=1	133.7	0	0	0	0	0	0	0	0	0	0	0	0	0	0	183719	0	1	ND	ND	ND	ND	3	3	3	3	MDGLKKINLIQKINEKLYDHLGIEDDNLTEFIIFLCEKSTCLEEFCKEVFENGGEIEQSVLKNIYNLIKKSKSEINDDENVNKQAAENGNDDDYNHISKEIQEIEKKNEKMKKFGCLSIKNSTNLAPLTDQSNEEGKPKDEDKGKDNSLNKKERIDENVKLKKNRQLKYSLDDVKNIKKAKYEGDNEDDYRALKVNNIFSGKIKKITDFGMFISFKTRDGYKEGLVHITDIDQNNKRINLNEKFKRNMIVKVKIKGIFGEKISLNMSEVDQKTGQNLVSNNKEKNIDENKTYFFDNIDDEFKHKRNKNRIDKYSEYFNDPKEAIKYESVIKMKSDYSKWEIQQLIKSGIIYDENIKNEYKNLKYEEKIDDEEEMIEIEVNEKEPSFLKGQTTKAGANLS…
PBANKA_1462000	A0A509B213	THUMP domain-containing protein OS=Plasmodium berghei (strain Anka) OX=5823 GN=PBANKA_1462000 PE=4 SV=1	37.6	0	0	0	0	0	0	0	0	0	0	0	0	0	0	1631194	0	1	ND	ND	ND	ND	7	15	7	26	MEYKKTKRPNQYVFEGSKHNSKRQKINVNAQCKGILMSALSNRRTNAGIKELLNFINLNFPVNTNDVIKELKVNDEENKISAVEKELKDEISKANSEHNRFVPLRNIIKNFTFIKFNNDNDLNPSDIIKKTFVLATNKKEKYFFRNICKIIPLDTICKPHISPFIKTVLPLMRKHFIDGKCMDKMFTVNYLLKIMNVSDEKNDEKNDEKNDEKNDEKNDEKNDEKNDEKNDEKNDEKNDEKNKDSSGNKKSWALIYKCCNTKTLTKKDVLKILDNCIGNNYSVNLSKPDMAIIVYVTEIMCGISIVKDYASTRKFNIGSFNDDS
PBANKA_1003100	A0A509AMF6	Pre-mRNA-processing-splicing factor 8, putative OS=Plasmodium berghei (strain Anka) OX=5823 GN=PBANKA_1003100 PE=4 SV=1	344.2	0	0	0	0	0	0	0	0	0	0	0	0	0	0	1925325	0	1	ND	ND	ND	ND	16	19	16	8	MSDNEFDKISEDNKNNTNDNPENVSQQCEEQEDAKNATSSEQNLQNKNIPQNTEFGDSNINNNINSVHHNVPINAPNLPPTFPNIPPPIPGLPPPNTHVMVPPNIPGMPPNMHNMPLMMPPMNYMMPPNMNHFLPPNMMNFPPPFMMKNNQMKNANYMNNQNMYGQGMEAGGPINNRPYIQWNPGNINNFGAPGLNNSPFFIPPNLPYIPSYMKICNSENENVMRPNNLQSINIDANQQEHGFYPFSNNADGGDVNQGNNNGEDGEEWADDLGINDNGEYANKMGKKRGTGKHNYQNNDEEGEHYDDHYSFKSNIVGGGKGHHISNDSLYGTEEFSIIKEKARRWRMLNSKKYSKKKKYGVVEEKEEMPCEHLRKIIKEHGDMSNKKYRYDKRVYLGAL…
PBANKA_0408600	A0A509AD73	Eukaryotic translation initiation factor 3 subunit K OS=Plasmodium berghei (strain Anka) OX=5823 GN=PBANKA_0408600 PE=3 SV=1	28	0	0	0	0	0	0	14521	0	0	0	0	0	0	0	1484745	0	1	ND	ND	ND	ND	11	18	11	57	MNINSIIEEVQAIKVYPHMMFNASKLKVLSDYVDIAFENNEYFDNEVMLTLLRLFCLYPHCYDKSVIKKILVCVLYNINTVDMNIYLSLINPNIYDDNIKGIVYLHDLIKECQFKKLWNCINNKSEENNNYDYSFLQNYNNFTCNIRKYILNSITLSFEKISIKQISEYLNMENVEEIEKFLNENKWTVKKIKNKDGEEQTICINENIENIQNRKNISTYFNDDNLTSYINKLNS
PBANKA_1442400	A0A509AR18	Uncharacterized protein OS=Plasmodium berghei (strain Anka) OX=5823 GN=PBANKA_1442400 PE=4 SV=1	92.7	0	0	0	0	0	0	0	0	0	0	0	0	0	0	317780	0	1	ND	ND	ND	ND	4	4	4	6	MDTEDKSIGDNKSKECELDEIANLENDISELNGKINSSINDSINAGSKYEEINKEETANASDFNYTEHINNMKREENEMNDNYVFENTQECNIKNSTFINFNDNINEKKNIEKDNEIHINDTSKNNYKDAENNKINENNVNNNIYNFNNPDKNLCDEINGDNLDSKKMQIKIKNLLKLIEILKDQINQKDQELYQIEVDMKMRNEKGEENTLSIEDDVIKSDGNSEKNENNIFINKMKKILVSQNEEIILLNEELKKKNKEIFYLNEENITKDEKLIELKKEIEENYLHLKEYKNMQSIMQIDANNKIYSAENYLSATNKKLLENNIDIKEKKLNIEKQKKVIKELYNQLNKRDDKIIELRRIIESVELNNNRDIIKYKENNIDLINRLRLNASLMNSQ…
PBANKA_1414400	A0A509ARJ3	Exportin-T OS=Plasmodium berghei (strain Anka) OX=5823 GN=PBANKA_1414400 PE=3 SV=1	136.6	0	0	0	0	0	0	0	6975	0	0	0	0	0	0	768317	0	1	ND	ND	ND	ND	10	16	10	9	MDELEVAILCLYGNENSQINKNEARKYCEMFQNNSDSWKYCITKLIESDKLEIKFFCVNVIIEKLGALKIEDLIYIKNSLYTYLEKKYITINEDPCVVNKLIQLYLYLIEYLYPNNMADGFKFIINNIMVNNDMNIKNIYIFFFLKLMNMLDTEYIDNSYAKKNLQIVTNLKESIKNNDLPLIVECFYYIMNLNIEENTSLAIFTLAKYVTWIDINYVVNDKVLSFIYNSLNSINPISQASYPFLTSLIKKGMNPANKIQFIESINIVYIIQNSPKIVDITFEINKNIMLKKGELINNICLELVESIFEITKLKDYDINVMKYNEVCDKATNLLFLILPHALDIFSVNDFYITNTVEQFFSLFFTKFKGIIEFSPGSNTENNNNNSNNCNRGIVGNSYQ…
PBANKA_0931100	A0A509ALZ0	Uncharacterized protein OS=Plasmodium berghei (strain Anka) OX=5823 GN=PBANKA_0931100 PE=4 SV=1	24.8	0	0	0	0	0	0	0	0	0	0	0	0	0	0	550978	0	1	ND	ND	ND	ND	4	5	4	20	MSYNKNYGGQFMGLRQGATNKGPQFSNNKDKFDKIKLNELKPTDKKEKVSATKVILYLSELRGINLPEIENGEIYFFCTAIFDNQDVKLSMEKSNYNSPLVKGEYLSNAYALDFESEIVLKIPEDATFVRCYISYVSSIEADGKRNIKLEGIGYTDPFIVKECHVYPYSRCKLNIATGAQELGGTLKVCVKCVDNAHPSTVKATEPCNVIEEFKKRYEN
PBANKA_1233500	A0A509ANL1	mRNA-binding protein PUF1 OS=Plasmodium berghei (strain Anka) OX=5823 GN=PBANKA_1233500 PE=4 SV=1	137.2	0	0	0	0	0	0	0	0	0	0	0	0	0	0	144458	0	1	ND	ND	ND	ND	2	2	2	2	MENKNEKRETSPELSSDNLVCENELENKTDKDINDTINFENTEKMKNIHDVNKEIFKSSNFESNTESCNSSEDKCNNKDTSNSMNKNKKIPDDDSLAKTDEISNKKKKTKNTPINKIPDSNINTKIMNPIDIIPPNYRVALPNISNYTQLYQINIPYVNTHSMNYNLQNYMSSSYKKYNNKYILNKDFINNNMTPIVHCPPNGVNTMDAMSTINYSKNNLSNYFDSADRINDNNSTHMQGTLNNIYSNYNDPNMFLNNENYIIPCKYTNYCCPTYMPPCTVVNYMNDLQNNKPYHQDNTLYDSNNRLNNNINIINSNIINSRIGKESMGANFVNVENNRNCDNETNTIAVENCNNIGLINYEENWLYPNFNRFIFAPKLQFNKETYQFPGMGNEPNCIN…
PBANKA_0816400	A0A509AID9	Probable ATP-dependent 6-phosphofructokinase OS=Plasmodium berghei (strain Anka) OX=5823 GN=PBANKA_0816400 PE=3 SV=1	146.7	26674	61272	72844	185336	0	28529	129868	179885	37784	56598	61973	13637	0	0	9941340	0	1	ND	ND	ND	ND	65	294	65	63	MEKNKEKESNPIQGKDTEMLNCLMQKLTSKNFLEEKEGKNRFYLVENKDVKIKKLKEHGHSASLNDNLSPLQYERIKYKPTLPKALASEYQILDEDFGDEFINKKDYEEIKKFFKSIDNLPMINVKETNNNELFKGGNVLKIGIILSGGPAPGGHNVISGIYDYAKRYNEESQVIGFLGGIDGLYSKNYVTITDNLMNKFRNLGGFNMLWSGRGKVRNKDDLLAIENIVLKLKLNGLVIIGGDGSNSNAALIAEYLKERNIPISVIGVPKTIDGDLKSESIEISFGFDTATRTYSEIIGNLCTDVKTGNNVYHVVRVMGRSASHVVLECALQTRPNIVLIGEEVEKDKVPLKSIINNIVNIILKRHDLNKNYGVILLPEGLIEFIPEIKILIEELNVIL…
PBANKA_0615400	A0A509AJP2	serine--tRNA ligase OS=Plasmodium berghei (strain Anka) OX=5823 GN=PBANKA_0615400 PE=4 SV=1	61.8	0	58034	83473	182208	0	9577	25833	198928	12334	76854	18255	0	0	0	1558363	0	1	ND	ND	ND	ND	20	69	20	42	MVLDINLFRTEKGGNPEKIKESEKKRFNDVSNVDKVIEYDEKWRKSIFKLEELKKNINLINKTIGNKKKEDKNVDVEDLKQRSLSMKEEIPLIQNEEKHLLKQRNMYLAKVGNILSSKVVINNDEEYNKIVRTWGECKNYEATDLEKSDISKEDIPNTKREVGNNNDGQNKVSIISEIKKKYYYHYDLLRKIGGVNFKKGVLVAGHRGYYLTGAGFLLNNAIIQYAINFLANKKYTPVYPPFFMKKNIMEECAELNDFEETLYKISSSSVASAEDKNIDANSGNNNISNEKSNKDDLFLIATSEQPLCALHRDETLESKYLPLKYVGISSCFRKEAGAHGKDIRGILRVHQFDKVEQFCISLPQTSYKLHEEMIKTCEEFYQSLNIPYKIVNIVSGALN…
PBANKA_1415000	A0A509AR81	Pre-mRNA-processing factor 40, putative OS=Plasmodium berghei (strain Anka) OX=5823 GN=PBANKA_1415000 PE=4 SV=1	93.4	0	0	0	0	0	0	0	0	0	0	0	0	0	0	490386	0	1	ND	ND	ND	ND	5	5	5	7	MPSSQNKSNLGNFPNNPNLGVFPNLPNIPGFPTLPNVGLNNNSMINNSSFINNNAIPLPFLPGIIPNINPSYENFNQLIHPQNNNMNVPLPPSNPSILGDMMKMYNKDFMLNNSNQMINNNLVNTTNNIPLNFMTNFNVNNHGWCEMVAKNGRKYYYNTITKISKWDKPDELKTKLELRISQNTKWKEYLCSDGRKYWHHEETNISVWDEPEEIKKIRLECASEENENNIDTKDSESNTEKVNKNQTSLNEIKNNDSTILGSNTPIIDNINDYTKISIENKTNFDNINKINNEKRGNIINNNNNININNSGKWIKFENKKDAREHLKILFEEKNIHPKLPWENALKILEEDNRWQTLVILTKGEKKQLFSEYTSQAIKKSAEDGRRKRQKSRELIFQAL…
PBANKA_1022000	A0A509AL04	40S ribosomal protein S25 OS=Plasmodium berghei (strain Anka) OX=5823 GN=PBANKA_1022000 PE=3 SV=1	11.8	0	0	0	0	0	0	91761	0	0	26379	25816	0	0	0	2475654	0	1	ND	ND	ND	ND	7	18	7	50	MPPKERKTKEQIAAAAAASGRSKKKKWGKGKNKEKLNHAVFIDKSLQSKILEVQNMKVITPSTISDKYKVNLSVARSVIKYLAEKNLIKEVCIQSHSQKLYTKVA
PBANKA_0517000	A0A509AH76	Early transcribed membrane protein OS=Plasmodium berghei (strain Anka) OX=5823 GN=PBANKA_0517000 PE=4 SV=1	32.8	0	0	0	0	0	0	0	0	0	0	0	0	0	0	449022	0	1	ND	ND	ND	ND	2	3	2	15	MKVSKIFVLFNVILITHYLVFGLSKSVPKKNTSAFKKFQDDLSKKIAKNKKTIVAALGYIAAATAIAAVGYGVGVHTAQKKDSKSKKLPSISRNSSNSNPKNTKGTNKNETQPNSDYKPSKSGGSSKYPKTESSTKASTSSKLESYYPKYVKSDSPAKPDSPAKPDSAPKSESSTYITSYKPRYGTTSPARSESPTSSVSSTSLSKTSTYSTSSSPPVSKTSTSSTPVSSTSLSKTSTYSTSSSPPVSKTSTSSTPVSSTSLSKTSTYSTSSSPPVSTYNHGSSSVNSTNSSGNALYNYSIPRPNVTSNLSIS
PBANKA_1454600	A0A509AR89	Uncharacterized protein OS=Plasmodium berghei (strain Anka) OX=5823 GN=PBANKA_1454600 PE=4 SV=1	268.4	0	0	0	0	0	0	0	0	0	0	0	0	0	0	165707	0	1	ND	ND	ND	ND	3	3	3	1	MEKGKLVGILERELKEYGDKDILMLFHQFYQSIEESDYENAQDSFNEMVRQMKKIYVVYDKRNKNDLIEKIKNYFKDETTEVNIVDISQEKLEVQLNKTIEEYDNFSKNLDDIKNGKLKENVEKNEFPCFKTPSSFLNTNLFDDINLDDLEKCEFSFDILDLYDKSYIESVDEMPDTVINDEDFYETFEYFINLLCLLYFLKNIYFDLSYRSNENSYSFLFKGFEERKNKIISYFFIFKRLKMYKLMDNEVIKIFCNFFQYTYINDYLIRNIFDNSTSMFIFTAVNNFNNKYEQDNISLSPNKTNVNAQFGNNDKVGNNISINQLFFGNNNIRYDIEKRERQTNGGYNDNNMGEKDLLKKNENDNQEDYLNKKLNNFFISNQTPNNKSDKNSFVEIIYN…
PBANKA_0100900	A0A509ADB0	ATP-dependent RNA helicase, putative OS=Plasmodium berghei (strain Anka) OX=5823 GN=PBANKA_0100900 PE=4 SV=1	150.8	0	0	0	0	0	0	0	0	0	0	0	0	0	0	307709	0	1	ND	ND	ND	ND	5	5	5	5	MSENIDDLFNVFEEDETKKNLLNNSKGPDHLNTIVEEQNGQDNIGYANGGYIMENERNINNKTTGAEIKENEIEMEINYESSEYNAPIDYKINVDNIISNHKSNNKIKDQIKEEIYNEVGSINRSNNFFNNKIRKTNGKNDQTKTEIRTNAYKEPVREKLIENSKTINNDDVLVLEEFGSDVNCIHKCVRPQSYVHNKLSESITPARTYKFELDTFQKKSIECLERNESVLVSAHTSAGKTVIAEYAIALGLRDKQRVIYTSPIKALSNQKYRDLSEEFKDVGLITGDISINPEASIIVMTTEILRSMLYRGSSLTKEVKWVIFDEIHYMRDRDRGVIWEETIILLPLMVRFIFLSATIPNGIQFAEWVSSIKNQACHIVYTDYRPTPLQHYIYPTSSE…
PBANKA_1320200	A0A509ASA5	SCD domain-containing protein OS=Plasmodium berghei (strain Anka) OX=5823 GN=PBANKA_1320200 PE=3 SV=1	267.3	0	0	0	0	0	0	0	0	0	0	0	0	0	0	202938	0	1	ND	ND	ND	ND	2	2	2	1	MDNQTILRRSTRISQSFGPNKKINYFLSDESSEDSLVNKKKERKQKRSSNKTNSHSNSSDKNYSADENSYNVNESDKGEDDEDDIDKLSEDREEDERTQKKKRSKKNGKKKKRSESNESSKNKDKTIVLYKSSDEQNTENSSDNIAKAKKKNSRRSKDALNQANKTSKRTDEIKNGINSTPRVYVSKNVSYIDKLNVDMDDDDFDIFKKSSRLDKNKRISTSIIHRRLAEITSKKRKSVYIESSNSDKSSEESDDEYTNEKFKTSKKSKHNNNNNDNNNKLIISVNNKKKHIIKNFEDFNLYEKIKKNPKNFHEIIEDIYYSLFNREERDEKIKVPTFFLNFLAECSGNESVTWTMDIIDYIDKQVYLYEDGSGTDIGNNNIRGTLLLPSNNNGSAYSP…
PBANKA_0719300	A0A509AMZ1	Bifunctional dihydrofolate reductase-thymidylate synthase OS=Plasmodium berghei (strain Anka) OX=5823 GN=PBANKA_0719300 PE=3 SV=1	68.8	0	0	0	0	0	0	0	40737	0	0	21485	0	0	0	700137	0	1	ND	ND	ND	ND	9	15	9	25	MEDLSETFDIYAICACCKVLNDDEKVRCFNNKTFKGIGNAGVLPWKCNLIDMKYFSSVTSYINENNYIRLKWKRDKYMEKHNLKNNVELNTNIISSTNNLQNIVVMGKKSWESIPKKFKPLQNRINIILSRTLKKEDIVNENNNENNNVIIIKSVDDLFPILKCTKYYKCFIIGGSSVYKEFLDRNLIKKIYFTRINNSYNCDVLFPEINENLFKITSISDVYNSNNTTLDFIIYSKTKEINPNEEVPNNTFLGVCDEQNKAFDDEDDYTYFSFNKNKENIKKNSEHAHNFKIYNSIKYKNHPEYQYLNIIYDIIMHGNKQDDRTGVGVLSKFGYMMKFNLNEYFPLLTTKKLFIRGIIEELLWFIRGETNGNTLLEKNVRIWEANGTREFLDNRKLFH…
PBANKA_0932400	A0A509AMD7	Berghepain-2 OS=Plasmodium berghei (strain Anka) OX=5823 GN=PBANKA_0932400 PE=3 SV=1	54.4	0	0	0	0	0	0	0	0	28081	0	0	0	0	0	301748	0	1	ND	ND	ND	ND	2	3	2	4	MNYHSSHHIRPEEEIFVDKGIQNVQLRRKNKMLIVTLAIVLGMFGFTVIYFNRTNKSSFNNGNVENYSNDDYLINYLLKSKAVKKFMGSKIEELIVESEQNEKNSIIVKDNKNNDYNEKSVLFNKNNDSKSFTTNLHDMQSIMNNLESVNIFYNFMKEYNKQYNSAEEIQERFYIFSENLKKIEKHNKENHLYTKGINAFSDMRHEEFKMKYLNNKLKENHSIDLRHLIPYTTAISKYKSPTDKVNYTSFDWRDYNVIIGVKDQQKCASCWAFATAGVVAAQYAIRKNQKVSLSEQQLVDCAQNNFGCEGGILPYAFEDLIDMDGLCEDKYYPYVSNVPELCEINKCTEKYSISKFALVPFNNYKEAIQYLGPITIAVGVDDDFESYNGGIFDGECTDF…
PBANKA_0938600	A0A509AJ39	Casein kinase 2, alpha subunit OS=Plasmodium berghei (strain Anka) OX=5823 GN=PBANKA_0938600 PE=3 SV=1	39.9	0	0	0	0	0	0	155675	0	0	0	26141	0	0	0	4073032	0	1	ND	ND	ND	ND	19	54	19	70	MATNQINKRIYIPKFYADANIHKPKEYYDYDNLELQWNKPNRYEILKKVGRGKYSEVFNGYDTEYNRLCAIKVLKPVKKKKIKREIKILQNLHGGPNIIKLLDIVKDPVTKTPSLIFEYINNIDFKTLYPKFTDKDIRYYIYQILKALDYCHSQGIMHRDVKPHNIMIDHENKQIRLIDWGLAEFYHPGQEYNVRVASRYYKGPELLIDLQLYDYSLDIWSLGCMLAGMIFKKEPFFCGHDNYDQLVKIAKVLGTEDLHAYLKKYNIKLKPHYLNILGEYERKPWSHFLNQSNMDIAKDEVIDLIDKMLIYDHAKRIAPKEAMEHPYFKDVREES
PBANKA_1144100	A0A509AMU2	ABC transporter E family member 1, putative OS=Plasmodium berghei (strain Anka) OX=5823 GN=PBANKA_1144100 PE=4 SV=1	70.1	0	0	0	0	0	0	42698	14939	0	22077	0	0	0	0	1104164	0	1	ND	ND	ND	ND	11	21	11	28	MKKKNKEDLYKENKLESSKLRIAIVSSDKCKPKKCHLECKKNCPIVKTGKFCIEVEHSSKIAFISEMLCIGCGICVKKCPFSSITIINLPKDINKDVVHRYGPNTFKLHRLPVPKLGQILGLVGTNGIGKSTALKILSSKLKPNLGKFDNSPEWRDILSFFRGSELQIFFTKLLEEQLSPIIKPQNVDLIPKQVKGNILEIINKKDKLNQKDKYIKVLELDHLLDRNVEDLSGGELQRFALLISIIGQTTNVYMFDEPSSYLDIKQRISMAKIIHGLVRHDNYIIVVEHDLSILDYLSDYVCCLWGKAGAYGVVTSPFSVREGINVFLDGFIPTDNLRIREESLNFKLATDQDVTDEDKKRLHFYTYPKIVKTLNSFTLTIDKGNFSESEIFVLLGQNG…
PBANKA_1405400	A0A509ARB2	U1 small nuclear ribonucleoprotein A, putative OS=Plasmodium berghei (strain Anka) OX=5823 GN=PBANKA_1405400 PE=4 SV=1	53.9	0	0	0	0	0	0	44278	0	0	0	0	0	0	0	980810	0	1	ND	ND	ND	ND	2	3	2	6	MSSNDSLNETCSNDNNKENAPNPDDNNLNEDKDNPNNENSGAININNSEQINNNGRLNNAGSRKWSYDIPPPPDSKKYPSENNSNDDSNKNNSINSQNNPIFTNANYNNKMMSNVKGIYNSYPQNMNTPMNMFPNADGMTNNLPLAMYQNAHNMLYNPMNYMNSKTYLKLLKYNKVITADPNIPPNETLYIKNLNDKIKCEDMKKSLKNIFNQYGLIEDIIVMKSFWRKGQAWIVYDTIESSTKALNSLQGFVLFGKIMQINYSHNKSDVHTKRNGTFIERSKDPKKPKQIIEREKKQKEIFEKMQQNYFEMQINHIKAMHNDELEKNKNFDLSQMDKETLIARAQQKAIEEKKRKKGEDPLQNNANYNIPSIHPPHFYAMNSYAPIQNNPVIPYKILF…
PBANKA_0937400	A0A509AK68	Pre-mRNA-processing factor 6, putative OS=Plasmodium berghei (strain Anka) OX=5823 GN=PBANKA_0937400 PE=4 SV=1	133	0	0	0	0	0	0	0	0	0	0	0	0	0	0	262136	0	1	ND	ND	ND	ND	3	4	3	3	MKSIKNGMYNFNPSKEDPFGKAPVGYVAGKGRGVTGFSGGVSRDDITEDKDKNDYSDFNYDEFHGYSESLFKDTEYDEEDKEADDIYESIDSRIDVRRKSRRENKLKEEILKIRAQKPTIQEQFSDLKKNLANVTLEEWESIPNVLNYSRQKQKKMPKNYLPAPDSLIMNKLNESNSHLNYAGSSGNTNGLKTPLGLKTPLGLYTPMSLGFQTPFLRNSINSTNYGIDTPLFGKNNRSGLINSGLNTPFTLSGYATPFAISGYSTPLNGSNINGYNTPITNERINNTNMLSLNDLGEARGTVLSVKLDELIDNVEGQTVIDPKGYLTNLNAKNLTNDSDIADINKARALLKSVINTNRKHGPGWIAAARVEELAQRKDKAKEIIIKGCIECSKNEDVWL…
PBANKA_0103300	A0A509AA93	GYF domain-containing protein OS=Plasmodium berghei (strain Anka) OX=5823 GN=PBANKA_0103300 PE=4 SV=1	235	0	0	0	0	0	0	0	0	0	0	0	0	0	0	1147782	0	1	ND	ND	ND	ND	41	58	41	30	MENNEIIEKVPDYTITDNLKKNENVLVYTKYEFIYAYIELILNGKNLGENHDLPLCSNSFKIEDIEENKKENMEYCDNNEVVNNNEIGNEGFDKYKNKNDFFNRDNIMNRNKLNESFDSNNALNSINKRNNNLLKNQKFIKNNDLKFAEGNITPINQSCNSNDHIMNNLNIHDNSENNKNNFFKKNNLNIENPYNNNSANSNTFGNNNIRESNNGNNNKKIIWRKNERGVGDGSISWRFGKSNNNNDGQITNNNDNDNISKIELKNSNKNFNNMKLSNSNNSEDNNQINDISRHSNKHNNIKDRNINNNKREDICNDFNFNNNSSHSGYNFTNNDNTLNDIQNIGTDPNNRVNNITDKYKKKQIYQNTGTKYGNNLNNNKSQHILNKNGYNNLDAYLSP…
PBANKA_1415900	A0A509AU27	Zinc finger protein, putative OS=Plasmodium berghei (strain Anka) OX=5823 GN=PBANKA_1415900 PE=4 SV=1	18.7	0	0	0	0	0	0	0	0	0	0	0	0	0	0	836701	0	1	ND	ND	ND	ND	3	4	3	35	MDNTWRCESCLVVNSNDAEECECCMQKRSTNNTNKTNDSNETTSNIVNDNKDSNAQKVNTNENEQDTKINESEKKVKISTVEGGGFMPSVELTNNKNESESKSVFLTGIDSNKSLKNEENSSDDKQKNTKNKTKERKRGDKRERQPSSRIQPARKCTQKKICYKT
PBANKA_0924800	A0A509AIQ3	Golgi protein 2 OS=Plasmodium berghei (strain Anka) OX=5823 GN=PBANKA_0924800 PE=4 SV=1	135.5	0	0	0	0	0	0	0	0	0	0	0	0	0	0	316750	0	1	ND	ND	ND	ND	2	3	2	11	MTLLIRCVLLYLLVLVCINCSNENNQSNNNDAKNTDIGGNQNGIDLSQIQSILDSIKAKSKDSSNQNNGNQPSNNNNIMNLINKLSNSNSDNNANAGNGLESLTKLLGNLGKKDGDQNGGSGLESLTKLFGNLGKKDGDQNGGSGLESLTKLLGNLGKKDGDQNGGSGLESLTKLFGNLGKKDGDQNGGSGLESLTKLLGNLGKKDGDQNGGSGLESLTKLFGNLGKKDGDQNGGSGLESLTKLLGNLGKKDGDQNGGSGLESLTKLLGNLGKKDGDQNGGSGLESLTKLFGNLGKKDGDQNEKNPLESLTKLFGNASKNEGNEKVGNLLDGLSSLIGNLSKKRGDENNKNPLHDIHSLFGNWLNDDNSKDTPFLLDNSVDHFSEKSKQAILSQYNNDE…
PBANKA_0507300	A0A509AIQ6	Dynein heavy chain, putative OS=Plasmodium berghei (strain Anka) OX=5823 GN=PBANKA_0507300 PE=4 SV=1	623.1	0	0	0	0	0	0	0	0	0	0	0	0	0	0	669986	0	1	ND	ND	ND	ND	15	15	15	4	MNGEDGVDNDNCGYDERVEEIMNIGLDYFNIQGCLREESINSVKSDEDIIKMIQLFYDSTDGCLFIFNDKDCLKIYDSIIDLYKRRKKEKFIIIYKTPENKVLYLEMNNDAENIIRRFLEIFFSNFMNKNEDINNSSLLMEMKKKFNNFLLNLKIVYGEMEEKLTLPNLPSEVKEGNVSNLEEYLTHFIKCYHIILRSFMAYKKNNYENCNEFLKCLKNKNTDINFLYDEINKKSFTEIINIILEKKKNSSYKNIIENIKTEIVSHKSEVFDLYTHLKPVVHFLQKLENSKEENIEEKNVYLMPIVHSLSLSIEKSDYLIKNCKFIFNFLSRVLINICNKNINTPDIINSIYNCIDVLKSKLYNTLNFLLTFLYLFKMYKEKETNVKLQSLNELSGKRI…
PBANKA_0811600	A0A509ANI8	Selenide water dikinase, putative OS=Plasmodium berghei (strain Anka) OX=5823 GN=PBANKA_0811600 PE=4 SV=1	116.8	0	0	0	0	0	0	0	0	0	0	0	0	0	0	165973	0	1	ND	ND	ND	ND	2	2	2	3	MWICKKIDPVVDIVIIGFGVRSKGFIEIFLESRELKGVNIILISKDSFIFLNKDVQNINACKESYVDLYKYCKERNILFINEKIDHIDSINKTIHFYSDRNNLNYDYLLCDFDYKSSYLLNKDLSNMNIYPYKNINLFFYYIHIIYLSLIQASKKNNSNFINNYYKWKSYFTEHITIKKFYNFFSYNDKYVEDIFLMYDKVVSGFNFDTENGDAIPIDKTNDIGQGSVLSSEIKNVQINQKSESDNCISLLLLSDNNDLGKIIYLSILENIKEIASYVKIKYIYLESDTYINDKKAKIDFCENYAIIRSIESINKIDNNYVIKCVCNKNGIVSYNYNECINVTNIRYPSYFYNSKYNILNSDTINTFCQYKNDNNIYFLNQINNYNDYTVCRTIYLNIY…
PBANKA_1029400	A0A509AJS8	Sperm-specific protein Don juan OS=Plasmodium berghei (strain Anka) OX=5823 GN=PBANKA_1029400 PE=4 SV=1	40.2	0	0	0	0	0	0	12609	0	0	0	0	0	0	0	647224	0	1	ND	ND	ND	ND	3	4	3	12	MSKGSENKNMEDQRTHFDEKEKKKLFLYGYEQQLLYGRINWKLAEQKKITKYTINTMKNFWNHNIATCLPQFIENYSKDVEKINELKKKKKKINVIAKLKSKKTITPSKVQFTKQTSNISMNRVIKGASLDYKKLNTQTFKNKKIVTSILKKNILNKQIDKKKNKNPQLNKMKTKKGIIAKKKVDLNKQKGNNPKIDKVKKGEKIKKNGKIDKKDKNKMKKNEKGGDKKDKIKNDKAVIKKIGKQEKDKVVEKNDKHKKDHEKKIDKNKDKEKIEEKGKKNDGVKKLDKKDEMDKNKDSKKDKVMKKEDNKKDDVKKDDKKGVKKDDKKVKKPILKTQKTKK
PBANKA_1451600	A0A509AS92	SUMO-activating enzyme subunit OS=Plasmodium berghei (strain Anka) OX=5823 GN=PBANKA_1451600 PE=3 SV=1	73.8	0	0	0	0	0	0	0	0	0	0	0	0	0	0	209879	0	1	ND	ND	ND	ND	3	3	3	5	MHKTIRKIFDTKICERLESMNILLVGAGGIGSEFLKSIITIGCKNIDIIDIDTIDITNLNRQFLFKKKDVKKHKSIVAKERALKHRKDLNINAYTFDVCTMKGSDISKYDYVINALDNIKARKYVNKLCITEKKVLIEAGSTGYNGQVYPIFSSETKCYNCEEKPKNKTYAICTIRQTPSLPEHCVAWGKLIFETFFCKNDNETLIDIKKHIEEESKKRNMDKEEIIRFIFNYLFHDTINELISLKKDYAIMPKPILFEENLKQEPHNIEKLSQEMPNSNLKTNDNKLIDKIYENNSIQLSSQNIWNKEKCIEMYVSTFNKLYKYLNIKKTTEEYLIFDKDDDDCINFITCLSNLRMINFSIKQKSKFDIQSIAGNIIPAISSTNAIVAAFQAAQLVHV…
PBANKA_1132400	A0A509APD6	CCAAT-box DNA binding protein subunit B OS=Plasmodium berghei (strain Anka) OX=5823 GN=PBANKA_1132400 PE=4 SV=1	110.4	0	0	0	0	0	0	0	0	0	0	0	0	0	0	253929	0	1	ND	ND	ND	ND	3	3	3	4	MQNTETNEKKTSRNSWVKELQGTYSNMLISGSKGISYLSSTFSGGQNLVSNVKTDVKNNHNKSIANDIEDNVLEDKNELQNENEEINISEKKKIIFEVYKKYYFIEMTKYHKSREKYTTNFLNFLEGLNDKMSEALKHGECNINNLNIFFKEFLKNDTNYYKGTSLGSNRINNMSKSFMSITGNDGFCDQCHSTIDAENYNIIHCKKNNETSDSMKSHDCFTNMDKQKNINQSNSKENNNTCDLKQKNYDSSKISEETEHVKTNVASGNIVSTTYERKNKPNEMLLFLDKVIDVDANNYNYYHTIINDWAQFGFINYTKVMNNMKASGNLIDNEICQKFLVTLKDSYIKEEDNLMAKLKKKKNEFLKQIEACKICWKNFENSYSNSEQIRSDRIKNSKK…
PBANKA_0903000	A0A509AL72	Ribosome assembly protein 4, putative OS=Plasmodium berghei (strain Anka) OX=5823 GN=PBANKA_0903000 PE=4 SV=1	75.5	0	0	0	0	0	0	0	0	0	0	0	0	0	0	360980	0	1	ND	ND	ND	ND	2	2	2	4	MENDINTLTKEILIQFVNHENKSTGPVINVPLSITKDNLDELINDLKKKSDNFIEDDSEDVNYSFMINDKLPLKNNLYESIKNNNISSEDILSIKYFPLNIFKVKKINNCNSTLPGHTNSILCLAFSPNSSHLATGSGDNTVRLWDINSQTPIATLKDHTDWVLSVLFSPDNKFLATTGMDKNVCIYDTHTGKLLNILTGHKKEVTTLCFEPLHLLKETNIKKNIPEKKKQKKEQHEAPNDKNNKIKNGNEEESNINENKNLVNVTNPFPDNNPPEQSGEIREENENKSKIDKMKKRKKTEIPDENESETIIETKSKDCYYINSRLASAGKDGSIRINNILSNSVDKILTGHTNTITCILWSGINEKNSRIYSSSRDTTIKIWNVYNSTLIYDFKGHKH…
PBANKA_0943100	A0A509AIX9	CCR4-NOT transcription complex subunit 1, putative OS=Plasmodium berghei (strain Anka) OX=5823 GN=PBANKA_0943100 PE=4 SV=1	339.7	0	0	0	0	0	0	0	0	0	0	0	0	0	0	671414	0	1	ND	ND	ND	ND	20	25	20	9	MNNNFNINLQIEDGITNKYEAEVNGYFAKLYTGEITVNTMIDIMKNLSCSPKGSKNNDIYKSMLLILFNECKFFPKYPVEELDITAQLFGKLIKHNLLISYGNTLSVVLKCILEALKKGSDSKVFNFGITALEQFEDSLICYPAFLSSLIPLPTLRQYNPQYIIHCSELLNTLPEQFRTLPYIDASTILKIKHISEISSYNNISNANISHIPNNDIKKISVTNANNLKNINNLVPHLTTMDGSNQTTTNFITHNNLSDNNIENSVNNNIISEKHNDNNTVNTINNSNRTDNYISNNNQTQFTNLMNNILNQNNNNNFNNINNDNMLLYINNILPNLSNIVDKNTIPPNINNLQAINRNNPLYKNKNPNTNLNAISGINNINNLNSAYNINLLDNNTSAN…
PBANKA_0404600	A0A509ACY8	Activator of Hsp90 ATPase, putative OS=Plasmodium berghei (strain Anka) OX=5823 GN=PBANKA_0404600 PE=3 SV=1	41.2	0	0	25071	89629	0	0	0	102437	0	0	0	0	0	0	699949	0	1	ND	ND	ND	ND	7	16	7	27	MAGSIWNKNSWHWEEKNYNKWGESYIKSKLIHLKIEDENLSIYFDTINITGNASVSIRKGKQISSFEFVIKFKWNCLRKKENINSFGGDVEILDFSNCSLEDNDYEINVEANESNADMKKAYEILRKEGKEKIKNTLKDFQLELLKHDTNESTKELKIKETEEEKLKDIKINYNDNVKIQQDINNNNNVNKIQNDEKKEGSVWNINNYHWEEKCLTKWAKEELEKILNSSTIELNNNIHFQFFNAEIEGEASSSLRKKKKIIIYDLKIGAEWKASKKNKNNEIEMEAKGYISVNEIISDFSADDQNKYKYNYIFDNNTPEHSTINNVVKSDIPQKMNEIIDSFIEKMKQK
PBANKA_1010000	A0A509AKZ9	Mitochondrial acidic protein MAM33, putative OS=Plasmodium berghei (strain Anka) OX=5823 GN=PBANKA_1010000 PE=4 SV=1	28.9	0	0	0	0	0	0	0	0	0	0	0	0	0	0	247890	0	1	ND	ND	ND	ND	2	2	2	11	MNFLRRNTVSLCKSHALNKTLNNSGNVFAKLSKRKFTDINSITKCNQRAQTKFNFGDGRKYASSEAQKLSEVVKSEVQHEKSNYEAPENIKKFLQNSGWKFEEQEGDVNMVLTKNVDDMKVIIDFQLVSPFQAEGENEAQAEMTDFSVTVEKPNKQGGITFYCTTLQNDEKFRYMIGNVKYYKNEEGKNSVSSYNGPEFEDLDDSLQTSLDEWLANLGVDSELCDFIDSCSIDKEQREYMAWLQNISNFIES
PBANKA_1112400	A0A509ANU7	orotate phosphoribosyltransferase OS=Plasmodium berghei (strain Anka) OX=5823 GN=PBANKA_1112400 PE=3 SV=1	29.6	0	0	0	0	0	0	0	0	0	0	0	0	0	0	621719	0	1	ND	ND	ND	ND	5	7	5	25	MDENNKETKNIDEELHKKYNELCKRIELGNDNKNCDDIRKMKKLLIDALIKYEAIKFGNFILKSKRKSKYFVSTGFLNNAISANIVSFLISNLILSKNIAFDYLFGASYKGIPIVSLTSHFLLNTNKFHNIFYLYDRKEKKEYGDKTIIVGNIKESSQDCVINSCNPQFEKKKKVIIIDDVFTCGTALTEIFNKMKAYEYLQVVACIVLLNRNEHEINENNEKVYFKDLFEQKYNIPIYSILNYEEDISHFIK
PBANKA_1320100	A0A509ANC7	Uncharacterized protein OS=Plasmodium berghei (strain Anka) OX=5823 GN=PBANKA_1320100 PE=4 SV=1	93.3	0	0	0	0	0	0	0	0	0	0	0	0	0	0	461571	0	1	ND	ND	ND	ND	8	9	8	13	MEQKKNSESPSFSERMSFNNKSFLDLSTYSKANYNKQNSINNTSEICEYFTCITNNQKDISKKYDQLFSLIKKFGKEIKYLLDKNDEYNNILIDTKEYINKIKTKLSDSSCNEFENIERKLFEDRNNVDVIGQIIVYLFEELQYYNKNSFECNQKINDIRKSIGSKDECTKLERQLTLKNDELKKEIIDNMNSLKENHDLKLKLNDERNMFKKDLEYMNLKILYIILKLLVRDKIYHRKKNIFFIWLNIIRRRREAKIKIIKFFCKNQNQLLSCSFNKLKTQYFEKYIIDKISSMMLNGYRNNGTNSNSSYHNSNINQNINSGINGANIYSNNKIDSKARYYADKNTSKDRKSSVFSNLNIHNKMKSNNISLISNDNDYDNMEKKSESSFYHDKKNSQA…
PBANKA_1009300	A0A509AJ77	Clathrin light chain OS=Plasmodium berghei (strain Anka) OX=5823 GN=PBANKA_1009300 PE=3 SV=1	28.1	0	0	0	0	0	0	0	0	0	0	0	0	0	0	309522	0	1	ND	ND	ND	ND	2	2	2	6	MNELNEYDGLNFNEYENMDNNEFDKKNVTGNKSYEFNEDLYIPTSLNDNVMENNVNYDNINIDYSSNYKDLEIDKRENPDMMNNNRYDINKNNDSVSKYATLGKESKISIENSYEQFFENESEISDTEESVTWETERLKRIEERKEYEEKKKKEIKKKAAEDLKKWYEEMAVVIKENKQNSKKISEEKKEENNDNKIWLKVSQYLDLEKGEYFKENSRMKQVLLKLLKEEEAAS
PBANKA_1210200	A0A509ANF2	PRE-binding protein, putative OS=Plasmodium berghei (strain Anka) OX=5823 GN=PBANKA_1210200 PE=4 SV=1	111.1	0	27585	14169	19051	0	0	265038	92651	14109	135467	32312	0	0	0	7517709	0	1	ND	ND	ND	ND	61	187	61	56	MHFITKMGRKAKSVASGGNKKEETENVAPVNNAKETTPNDKKQVGSKPNEKNEQKNKKENVKPEETALNGQLNGNVQKKKNNDAEKEGAIKEKGSNANTNKSQKNNEDQKKTQKNKNAKNEGNENNKPKGTAVEDKNNNKQVEGNGKNANKNQDNKKKGKAESPVSPQNINNKNNGKEKNVDEIKKEEAKKDAKKDLKLKEDERKKIENDLNKKFLKLSKQDNYKNISDKIEAEVKRKAEFEAFIGTINSSISKINAQTPRPVNMKLTSADIENKCKEAKLKKKKLNPKSEEEMEEVNTYINYLEDQLIITKNYESFKNFQNRLFTLKKTCEEKLKENQKSLNEIKVHEKKLKFVEKIIKMKKEKQNIQIKENDIINKEFSLPNDKYNTLIKPYNFLNK…
PBANKA_0518700	A0A509AF36	methionine--tRNA ligase OS=Plasmodium berghei (strain Anka) OX=5823 GN=PBANKA_0518700 PE=3 SV=1	104.6	0	0	0	0	0	0	0	0	0	0	0	0	0	0	1120369	0	1	ND	ND	ND	ND	17	30	17	29	MILYPNKYLLSGTLKCMLAAHIYKLPLELSDDFFFTRTFEIDKSLIVNKKPLLIYENKFVSSTNAICFLFHRLKNKGINTKGLDDKLRLYLTWIEWSDILEKNIEHLNKKKIIESLDLLESYLSENNNKKFICDEVDQIKREDGCNGANQNPKNGICGITLADIYVYTSLKYSNIVICNESWSHINSYVERINNLEDVQKVVEAVEKVHKLKNIYSLFISKTCEKNINDHVKNDNFYITTAINYVNGEPHIGHAYEIVLADTLARYHRNLGRDVFFTTGADEHGLKIANQALRNNMTPQELCDLNVIKFKKLNKDLHTTEDYYVRTTADIHKKIAQSIWMKCVKNGDIYLGEYEGWYNVREETYIPENEAKLMNYIDPLNNVKLEKMKEPSYFFRMSKY…
PBANKA_0914400	A0A509ALK6	Heat shock protein 70, putative OS=Plasmodium berghei (strain Anka) OX=5823 GN=PBANKA_0914400 PE=3 SV=1	73.1	0	0	0	19004	0	0	40056	0	30917	43430	126322	254281	0	0	504382	0	1	ND	ND	ND	ND	14	44	14	30	MASFNKNGLAKIVETCLKRNPLKNKIRELCTSKVNHNRASGDIIGIDLGTTNSCVAIMEGKQGKVIENAEGFRTTPSVVAFTNDNQRLVGIVAKRQAITNPENTVYATKRFIGRKFDEDATKKEQKNLPYKIVRAPNGDAWIEAQGKKYSPSQIGACVLEKMKETAENYLGRKVHQAVITVPAYFNDSQRQATKDAGKIAGLDVLRIINEPTAAALAFGLEKSDGKVIAVYDLGGGTFDVSILEILGGVFEVKATNGNTSLGGEDFDQRILEYFINEFKKKENIDLKSDKLALQRLREAAETAKIELSSKTQTEINLPFITANQTGPKHLQIKLTRAKLEELCHDLLKGTIEPCEKCIKDANIKKDEINEIILVGGMTRMPKVSDTVKEIFQNSPSKSV…
PBANKA_0511400	A0A509AIC7	Peroxiredoxin, putative OS=Plasmodium berghei (strain Anka) OX=5823 GN=PBANKA_0511400 PE=4 SV=1	44.5	0	0	0	0	0	0	24926	0	0	0	17433	0	0	0	1149393	0	1	ND	ND	ND	ND	5	11	5	15	MIQNNKISDEILAIELQNDQNENTTLKAEIEKNTELKGIALFIYPKANTPGCNEQAKLFKEKHQEFVQNKYAVYGLSADSADNQLKWKNDLELPFTLLCDTEKKLLKEIECLKEDDKILRSHVVISNEFIVFYVKKGVKPATSCEDVLNFIINGEEKEEANGDETKEEEGKEEEIKEKEVKEEDKKSSEEKTNNQDKGKVAKSSEGNGNVQKKKKVVKKSSNKISSKSTKNGKNKNNKIVKKFGKVKKEVKKKLISKSQKKIDNKKSKNKNIKGKNVTKKDSKKKANVKDEKKNKNKKNNSKNSKNKNVPQKKQMKMSKGNKHASSSKNTKKVQNKKIDKKNISKKNISKKNINKKNISKKNINKKNINKKNVSKNNAKNTMKKKLKKK
PBANKA_1461100	A0A509ARK0	Pre-mRNA-splicing factor RBM22, putative OS=Plasmodium berghei (strain Anka) OX=5823 GN=PBANKA_1461100 PE=4 SV=1	44.6	0	0	0	0	0	0	0	0	0	0	0	0	0	0	11219353	0	1	ND	ND	ND	ND	6	6	6	20	MDRYGHNIRGDVKKQGYENSDLPILCETCLGENPYVRIIREENGKECKICKNAFTLFRWKPGHNARYKQTIICNKCAKVKNVCQTCLFDLEYNLPVQVRDKFLETSITLPENETNRNFFLEQLENNISTGTYDKINHGNMDLSKLKRRDPYFKRNMARVCSFWRKNACNRGDECPYLHKEIHLNKSLASQNIKSRYTGENDVLAETILNRYKNDNIDEKNMANKICIQGISNSTRVENIKECFKKFGEIKSFKMIPKDSKIFISYATLTAAKNAAEKYKDGLELNGSNLTVTIQDNPNNNVWPSPAFGKYNTYLSQFNNNNNNKFTKNNNNFRFHNPPPSHSQGNTMNNMMPPIYFPYNNYNLNSMPPNAIPYASMLPSEAEQRK
PBANKA_1233300	A0A509AP39	ATP-dependent RNA helicase DDX23, putative OS=Plasmodium berghei (strain Anka) OX=5823 GN=PBANKA_1233300 PE=4 SV=1	108.5	0	0	0	0	0	0	0	0	0	0	0	0	0	0	329379	0	1	ND	ND	ND	ND	3	3	3	3	MFFFKRNKSNVPEEENEKENENENKDKTNDVVVNNPFQNIQKGSLEEKKESNNEILSDEENLNNSGKNDNKEEKTSFPNNENNSRSTEQEQKEKPTTHKEENNKGLAKERIYQNLHISGLKKKTINLYNSSSSDDDSEDSDKKIVLNKSQNKNSNLNKRGKYNNKKEKGNKINDDKKNKSENKRIFANISSNKEKLVFLTKKERNENKKKLENQNETIKNSEDIYSDEHDDNYKQNKKSDDIRNDRKKQKKRNREHSQSNEDKKISSNDNIHELNKQELSKKEENKKLYQITYEKTQSSLAELNMLHIDDIEREKFRERELEIIKQQYLGLNKHKKKMQKPSEKFRNIFNFEWDKSEDTSRNDSNPLYQNRLEPQLLFGRGYIAGIDVREQRKKHNFYD…
PBANKA_0828000	A0A509AIY4	Zinc finger protein, putative OS=Plasmodium berghei (strain Anka) OX=5823 GN=PBANKA_0828000 PE=4 SV=1	142.1	0	0	0	0	0	0	0	0	0	0	0	0	0	0	712319	0	1	ND	ND	ND	ND	20	29	20	21	MLYKTQLCSFYAKGICARGNKCSWAHGELDVRPMPKFYKTRMCYTFLSGSYCEASKCTFAHTEEELRGSGKALRLCTKYFLDGYCSKADKCPMAHSINQLDPSVKFSSTELMSRVYNNEELENYKNRMGINNNENKQTDEVKGNHEDYNDNMNNADNEKDNSENNSKNNNDNKNGQRDNSRNNKINKSNQNNEYELRKGLGDSEDDVNKEKDKYNMNRFRNNENMKDSKKSPFNFYRNNERKTYKEYLIDTNQMNGCIGDIDKDEDILYNDILMNGDYMRRKNSTKENLINNKFENITSNGYHYNYDGIIEEREISNSKIYKYKNVNNGENADMFSNNYVNMKNLNMGNKAMLLNEYYKNNFSLAEHNTQNGENSKGNNNGNMNGVYGDANNFDRMSIL…
PBANKA_1022300	A0A509AKZ1	mannose-1-phosphate guanylyltransferase OS=Plasmodium berghei (strain Anka) OX=5823 GN=PBANKA_1022300 PE=3 SV=1	47	0	0	0	18709	0	0	16818	44850	0	0	0	0	0	0	872153	0	1	ND	ND	ND	ND	11	22	11	42	MNALLLVGGYGTRLRPLTLTTPKPLVDFCNKAILEHQILNLAKSGVNEIILAIAYKPDNIKSFVNNLQQKYNVKIFFSIENEPLGTGGPIKLAENFLSKYDDFFVFNSDIICSFPLIDMMKFHKENKSLLTIMVKDVDDPRSFGVVITDNEKKILKFEEKPLIPESSLINSGIYILNKKILNFIPKRNTSLEKEIFPNLATDNLLYFYKLNGFWADIGKPSDFLKGQSLYLNSFQNLDKLKNDKEKTIIPDQLLICYNINEDENKDIKKNKLFISFENIEELNKFDENTNQVLNNIKNFYIKIEGNVLISSNTVIKNNCFLGENVVLGNNVILGEGCRIKNSCILRDSVINSYSYIDNSIIGSKSCIGSWARIEGLCVLGENVNLKPELFINNVFILPY…
PBANKA_0913800	A0A509AJN6	DNA-directed RNA polymerase subunit beta OS=Plasmodium berghei (strain Anka) OX=5823 GN=PBANKA_0913800 PE=3 SV=1	170.7	0	0	0	0	0	0	0	0	0	0	0	0	0	0	169659	0	1	ND	ND	ND	ND	2	2	2	2	MAVMTPNNHKTNEASEKEMDRYKMDSRKSLISKNRNNEDNNKKTRINLDITDEEIKLHVKIIESLYPNIKLKIDKVINGTYNIFTKFLVQSHIDDFNSFINVYIKNMPETLPVIEYSPNLNKYSCLNYERKPKERIKLYVSDIIIKSPIIKSDNGNTRPNYPYLCKLACSTYEGEVLMVINKQYKNEIVRTTVSTGFIPIMVLSDLCNLKNLNKKELVQKGEDESLLGGFFIISGHLKIIRYVICPKYNSILLNEENKVHINCLLSDNSVFINSLAYLKNYEYEFLSRFQGSFIHIPFNVLILCLSPIKKKSYIYNKIKLGIKNENAIKYIENYINSIFLKNNINEKEIFEKYNLKYIGKYANVSRTIFRYYEGNNHKKGKSVINYCVLPHLQTNSEKF…
PBANKA_1445400	A0A509AR48	Protein transport protein SEC13 OS=Plasmodium berghei (strain Anka) OX=5823 GN=PBANKA_1445400 PE=3 SV=1	76.7	0	0	0	0	0	0	181926	0	0	0	0	0	0	0	3259658	0	1	ND	ND	ND	ND	22	55	22	55	MSELIVFDSNHTKSINDCELDYYSKKLATCSNDNTVKIFDVSLAREPVCVAEIRDHTSAVWKVCWSHPKYGSLLASCSYDKSVIIYKEVSINKYDMIYINNEHKSSVNYIEWSPSEYGLHLGCASLDGNLSIISYNFNKGSTEGGWYKNSVRAHLNGVSCLSWEKPFNLISENKNLNDTNDAINSFKLVSGGYDNQVIIWTFDNNTKEFHKIYQMNDKPHNSLIKDVAWRPNLNDSTNMIASCSDEKIVILWIEDASNNKWKNGQIIKLKHKVHKISWSPNGTILAIACSNENSYLYKENMEGVWEEICNLSDNEKKKLNESVSNVNNSGAPLENTDNTNGYNSNAPYMNTEGQHMLNNNINYSNQINNMPYGNEMVDNSKNMNVNNPMMQAEQNMLKH…
PBANKA_0812000	A0A509AJ96	DNA primase large subunit OS=Plasmodium berghei (strain Anka) OX=5823 GN=PBANKA_0812000 PE=3 SV=1	63.7	0	0	0	0	0	0	0	0	0	0	0	0	0	0	513906	0	1	ND	ND	ND	ND	7	7	7	15	MIIRKRSINGSIANKEKLNEKKLQNITIKNYEINEDKKKTFFDYYSCIYPFNMPISLYKYPPIFGHCSLSNFQEIGAKRLALLQFFDTYTIGEEKDSHDSNNTSGDGYKKLDKNNSMENKNKQIRQKIYEYKFGIQSMKNYSKEEMENIIMADLLSHYILRIAFSRDKEKQKWFLKQELKLFTFRLNELKNINVLNQDNLGESERGLIYLLKRENLNYDFIPKPSAAYISNNDKWNKYTAFIQNRDTIEKLFKVPFFPDAYFLVKDHKVCVEKGVAYVPDIYLDAILITQFKINIQESFKYLEQNEKLLLDAQNDSRISAFLTALPKAYVAKDFRQNYEHTEDTRLMPQNLYNIYKQSFPPCMRRIFVNYIKDKHLKHWGRQQLWLFLKGAGMTLDENI…
PBANKA_1356900	A0A509AQV2	U4/U6 small nuclear ribonucleoprotein PRP4, putative OS=Plasmodium berghei (strain Anka) OX=5823 GN=PBANKA_1356900 PE=4 SV=1	71.8	0	0	0	0	0	0	0	0	0	0	0	0	0	0	356346	0	1	ND	ND	ND	ND	6	6	6	12	MKISDVINDYKSLESNKLKNSDIISKQISNDRILEEFEIKNKIRKVCLGIPTKDLEVKNILRLLKEPICLFAEDNYDKRNRLKHILVTRYDKLIIKNKGENIEVEEFKNILKKYYIDFSKLYDTTSPEYQKVNELEDELRNKGIKKDDATTKSGISDNILKDKFYTESTEELKLSRINITLKTLPRIYLYKEMINNFQNKYSREQYENYISSYNEHIKSELDLYISQLGDSRPLTMGKFSPDNSVFAVSSYNTYINIFNFKNDNYNLVKTLKNGHVDKINCVEWNYPNNYSYYSTTNYTDINKSDLLLASCSSDKTFCIWKPFLYETNDGNNSSENYSNLSNKSDPNDNNDGKKGGVKKMKKNEKKNNTQENANENDETGSEDINNNGNSKHPLLCKVK…
PBANKA_0704700	A0A509AFQ4	Uncharacterized protein OS=Plasmodium berghei (strain Anka) OX=5823 GN=PBANKA_0704700 PE=4 SV=1	57.2	0	0	0	0	0	0	304515	0	0	0	0	0	0	0	5812902	0	1	ND	ND	ND	ND	16	47	16	45	MWNIFSNEDLSLHVESENIENNISTEKAVESENKQNILMKTDTHRSCIYENNIKEIRRNIRKKYRIVQTQLLKLAKIAKQFPEIEDEENVNSNKNTKSVGKNCEEDNVTKKEGDINHPDIENSNINLEKNKSNELKQTNNEDNKTIMVSIELIKRMQKITKKIDIEKLSSKKKKKKIYIYKDEDEAFKNNLLKSNLPANYFNASSKNIDIEKSNKKIMRRRSKRLDFLKNGSNNFKNGNIRNIYEHARLLYKNDTKNHNTNHYYNYMSPYDRLKKTKTSIYNDTDNAQLTDFYVTSASNTTFNKLNYMKKNSKINHLNTIIHNDEINYNRIMSNDYSRGYSNDPSVVYGGILNSGSFIQRKGNDKMGYGIFEKKIKNNYKIGLYKYNFNNVMTNYFPEY…
PBANKA_0719700	A0A509AIV3	Rhoptry protein OS=Plasmodium berghei (strain Anka) OX=5823 GN=PBANKA_0719700 PE=4 SV=1	88.6	0	0	0	0	0	0	0	0	0	0	0	0	0	0	329875	0	1	ND	ND	ND	ND	4	4	4	6	MYETKSSLRYPSKKNLSYEKELSSTSLQIRKNRNDIIKNKVYCPIELKNVYKLLEDSDQLLKSKNLSLEELIEHNNKIAEFIELCGNFKVNTNNQNKPELNKAYNSIEQNMQYLNKHIETAKKDSITLKKKLKKSTDPLFYSTLEQKYKQICLDIENKKNEIKFLKDIIRKNERLLDSNKKKPNKVALEKEYKNLLGQQSNLCSRLIQLQNGNKLYEENISKIDIQLEEIKKKMNELKIDRMKENENPIEECINLSKDILEKRIFTLNTKRDELKKEKNNVINNLMSILTKLKKQISNLESEKNNLLNEEKNNLDKYQILKRTINTKISKTENKIKVFKKKTILEKREDKNEPVKSEIIPQKDKPYNSNEHISENETNFIKNLLNQESNSYNINKNQII…
PBANKA_1423600	A0A509AQI6	40S ribosomal protein S16, putative OS=Plasmodium berghei (strain Anka) OX=5823 GN=PBANKA_1423600 PE=3 SV=1	16.4	0	19679	22811	0	0	0	105665	0	0	68082	75526	0	0	0	1198558	0	1	ND	ND	ND	ND	6	26	6	35	MTTKVKRVLTFGKKKTSVAVATVTNGKGLIKLNGKNIDLVEPYILRTKVYEPLWLIGSAKLKNLDIRVRVKGGGQTSQIYAIRQAISKGIISYYQKYVDESTKKELKDTLLRYDRTLLVGDTRRCEPKKFGGKGARARYQKSYR
PBANKA_0704100	A0A509AMI6	Ubiquitin conjugation factor E4 B, putative OS=Plasmodium berghei (strain Anka) OX=5823 GN=PBANKA_0704100 PE=3 SV=1	142.2	0	0	0	0	0	0	0	142746	0	0	0	0	0	0	78013	0	1	ND	ND	ND	ND	4	5	4	4	MLDIVKEDNLIQNTFQICLKKEGGNNTKSHLESYENELKENNDELYFKVDNLYFILIHKIASLHKQKKNCLSYLCSCSVRLQDKHFFKSLNIEYKSIENITNEILDQIINSTIIYLENLDVYPNAKISYKERINVFYEFLKGSCTSRFLKKLLSAIEENDKSENENNKQLNKFFNPIIDIILENLNSRNLIYPKNDVAVLLKFISSFKQLADLVVNNKSIFLYLNLKDRVKDTILYQSHFKIEDSQKDEEEKMDNEKEVNNINVSDQVDGNESNKIYGFNKNGKSSNDKEIGGCGYNLQLNSLLGRLISPTIITMPNIKNKEEIAMYKYFYNNTTNSLNKMTLASLKNIYTVLRGDTNWILENCVEIIKNLLKGSNESKKRVLLWLNCILISNEKKTKI…
PBANKA_0704500	A0A509AID3	HECT-like E3 ubiquitin ligase, putative OS=Plasmodium berghei (strain Anka) OX=5823 GN=PBANKA_0704500 PE=4 SV=1	871.9	0	0	0	0	0	0	0	0	0	0	0	0	0	0	192979	0	1	ND	ND	ND	ND	3	3	3	1	MKIQLPKDDNYILMLNKISKEEKFFIHILSTCNNEALLNHLVPFIEWVWVKSDLIAWAPVLNRFDDLLQKYILHNKLNKKEEIIANEEVNNTNIENNNIDINTKFSDISFIPSDQLIEEILRFTYCILDNCLNKSKYNSLDHLLILLWCFNPKISILSAEILNIYYLFIKKTKKNENKINEIISSLSALINIPIPNFLHPYINIDIGNITDNNYISGIILYYLHDFNDKKYMNNIYSKIENKQLLDLINYKEIDLNKIILNIDNNDIKFTSIFPNQVSYNNSKDVLQNAYDKIVNKYNINEKKKFDLRHKLRIYIGLICPKYRKQIFNLRYLIICGSLSINSILYTQIIPGNNIFIQEILYILKFHKFINNKTLSIIFDLLTTAIESHIHYKVVSDILG…
PBANKA_1214200	A0A509ANJ2	Ribonucleoside-diphosphate reductase small chain, putative OS=Plasmodium berghei (strain Anka) OX=5823 GN=PBANKA_1214200 PE=3 SV=1	40.1	0	0	0	81140	0	0	37519	27986	17296	16315	0	0	0	0	1219660	0	1	ND	ND	ND	ND	11	34	11	38	MDKEQYHTQEVLLKAQYNDEILKENQFRWVMFPIKYKTFWNYYKEIESLFWTAEDHNFDKDKPFLNSMDKITLSKLLELLCFYSLKDLHLCDEQAIITSKLLDIIQIPEGRAFYGFQMCMENIHNEVYACIFESYSSDSKQKKEIIDKVLKYESVFKKQNWLYSEFEANIPFYNKLILLYISKVLFNGGFSILASHCKENNILSCFTGVHEKIQRDEYLQGDFSVMCCNHLNNKLKYESVLYYFKSAVELEYNFCVDMLDFNFLKITKEQVKQFLQYLADTMLLNLKYPKHFNSKYPFTWKEFSKIVVSENAKNESVKKSSDLYGEKQITFDEDF
PBANKA_0407700	A0A509AI60	60S acidic ribosomal protein P2, putative OS=Plasmodium berghei (strain Anka) OX=5823 GN=PBANKA_0407700 PE=3 SV=1	11.8	0	0	0	0	0	0	0	0	0	0	0	0	0	0	276823	0	1	ND	ND	ND	ND	2	2	2	36	MAMKYVAAYLMCVLGGNENPGKKEIKNVLSAVNAEVEEEVLGNLLDSLKGKSYHELISEGLKKLQNVGGGAAAAAAAPVAGDTGDSKKEEKKEEKEEEEEEEDDLGFSLFG
PBANKA_0924000	A0A509AK72	Uncharacterized protein OS=Plasmodium berghei (strain Anka) OX=5823 GN=PBANKA_0924000 PE=4 SV=1	56.8	0	0	0	0	0	0	0	0	0	0	0	0	0	0	384610	0	1	ND	ND	ND	ND	4	4	4	10	MNGKNNNELETNSNDNEARGRDVNLDENKDTIYSENETNNNIEQKNVEEKKESSSLFSKYYSKLVNINDNTKDNDTTFNHENKESTYYTFNKNNENSENNENEYISKDINLDEENISKDHFNESLQNIINFNKKNVDLDLCRGEIYLTNNELFYISYLVMNNHFRFSPIEDQKKKKKRDIVNSEELIIDSKRKKSDNTNDYYKIDDKSEIDLLKLSQENNSVHEKEDELTGNGGMYDNDSNSWSNKYSEHEISFKKKQQIDICNEILNHLQSKYYEQILNIENNFKNLENKIEDNNFFNFNCIMEKLRNKKYDNILLIFDDIHMYLNNLLFLSKPSSYIWMKLHELLNQVANTLLNIHQMKREAFNEIDYNFQDDNNEKKDIIGSQTIEQSINEEEKLS…
PBANKA_0501051	A0A509AKB9	Fam-a protein OS=Plasmodium berghei (strain Anka) OX=5823 GN=PBANKA_0501051 PE=4 SV=1	34.8	0	0	0	0	0	0	0	0	0	0	0	0	0	0	505472	0	1	ND	ND	ND	ND	2	2	2	11	MNTGYIQVVLFLLSFFVYMNNNAIASELSLKKSKNISSSKDSLLSYIPDKIFKPSNSLICTNPDEIEKAEKIMGEAIERLKEHAIHSNDYRLYHHYDEDVNVYRKRHKYLIVDKIDVKIHNTDKYEEIIDTLFNFNNDIYSGGIVVEGKVVREYNPNLVMIQKRYIDVPNKPFEGYFYSIATKHQVSEDTTVIALTSANINDYNHIDKNLFRNIIVESANSFETDICSENYIRRRYLNKMFVHLSGYIIKKKSKYIQITCINALEVDNRNAPKFVEERFKSDKLTILVSTRNKYSMK
PBANKA_1415600	A0A509AQA8	DNA replication licensing factor MCM4 OS=Plasmodium berghei (strain Anka) OX=5823 GN=PBANKA_1415600 PE=3 SV=1	107.4	0	0	0	0	0	0	29851	0	0	0	0	0	0	0	1207119	0	1	ND	ND	ND	ND	27	41	27	38	MGTPRRRPAQNTNSYIQNSPSIFGTNNEIFGSNFMHTPVSSRRTKNSKSFLNSMLNESKYLNQSNTGSQFLRYGHTPLAIRRIKCARADIGDVGREAFMEDVESGRLPHFIDSNLEQIKELFNQFFDEFNITNYSDVLQFTDEDRSITEYILLNRDNLKVYLAYYGWKMIKFIETGRQNECKLNNCNDDENDTDGVKGLDHIKSFEVDLTHIYFFNKKLYKLIIEYPSDCISEIDKIISAKYNSLMALVLEGETQSGSPGMQHGNNINDFNGNINKQDYCRVRFFNKRHKDTPRKLGPNQIETLVCIKGVIIRCSNIIPEMTMAAFKCTSKKRIGVNNYEKCNEEVYEHVIQGEVQEPLTCNNCNNKNTFELWHNNCCFSSKQLIKLSEVTEHLKQGET…
PBANKA_1350700	A0A509AT90	tryptophan--tRNA ligase OS=Plasmodium berghei (strain Anka) OX=5823 GN=PBANKA_1350700 PE=3 SV=1	76.5	0	0	0	0	0	0	0	0	0	0	0	0	0	0	254428	0	1	ND	ND	ND	ND	3	3	3	7	MEKLKTIYVDSALSIIKGALCVILQIPTSRTTESVKKKQNFIGILTVNSIKSEPTISQYDDIKKLVKNKILENAPFYNYQIERSFADKFYGDCIYDNFGLPKNINEINLIILEEWNINCNRNRILKHTGLIKNIEINNFKYINNKESLEVHFSVNPMYTFEELSTLYKNEKSLYNFLLCPIRKVCTNSEHIVTNGYRQNDNILNNVENRENNEEYIYINVDDLLEKNKVLPPSGVENIGYERSNEVTPWNVNINGDGIDYNKLIKQFGCSKIKEEHIKRIEMLTKKKAHHFIRRNIFFSHRDLDFLLNYYEKNKSFYIYTGRGPSSLSMHLGHLIPFYFCKYLQDVFNVPLIIQISDDEKFLFNKNYSLDYINKLSKENVKDIIAVGLNPELTFIFKNT…
PBANKA_0618600	A0A509AGV8	Uncharacterized protein OS=Plasmodium berghei (strain Anka) OX=5823 GN=PBANKA_0618600 PE=4 SV=1	27.5	0	0	0	0	0	0	0	0	0	0	0	0	0	0	622971	0	1	ND	ND	ND	ND	2	4	2	9	MKMNITLILGALLLNSVLGKSQISKCVFYDKRNSELKNTFYVPQDDVNMYKDTIQKLITREINNLYQSISMSDDENNNYRESNISNFDEIKQKGDVKKNKEMEEKLKYIENYRKYAKDILKNVEFKCEDVNDYESKIKCNLCIYTEIINNKHIRQGQVVQIFMNECIYGFYYYDNINQYTENNKAIQASGDDISGAKLDDIYFNITKDITSGRTDQINFFKQGASKYHPVCCVTE
PBANKA_0920000	A0A509ALN5	Multiprotein-bridging factor 1, putative OS=Plasmodium berghei (strain Anka) OX=5823 GN=PBANKA_0920000 PE=4 SV=1	15.6	0	0	0	0	0	0	0	0	0	0	0	0	0	0	1407376	0	1	ND	ND	ND	ND	8	13	8	43	MQHQDIKPVIWNKNDRKPKPKNIEEARKLGIDVEIEKKFLGGKNKSCKGNLIIENKAKIEQETENFKIDRVTPAFSRALQQARMSKKLTQVQLARLVNEPESVIKEYENGKAIPNNMIIQKLNRVLGVNLPSPKKK
PBANKA_0207200	A0A509ACH3	V-type proton ATPase subunit C OS=Plasmodium berghei (strain Anka) OX=5823 GN=PBANKA_0207200 PE=3 SV=1	45.2	0	0	0	0	0	0	0	0	0	0	0	0	0	0	544433	0	1	ND	ND	ND	ND	9	12	9	26	MNEMPMCLFIACSTSDNTSREYIYTILKNRLLGSNVCIDTNILDVPTNLKFCTFDDLLKCADDLQKYDSYAYGCLKKIEKIAKEYDENIELKIIYQRQHINIDQYIRRFSWDDAKYPRNRSLIDTIDVIINNITKLHDEIQIKSNILNDLKEKKKLYISKHDSNNFIHKNLNEILTPQIVSESDFMETEYITTVIAYVPKDSISEWINNYEKFSQYVVPRSAKQFNDLIDKDGNTLWKVFVFKKFVNNFIENAKNKNFIVKPFKYDESHYNNIMESRTKIETEVIRQETFLRRMCLAAFSDVFIAFIHINILRVFCESVLRFGVPPNFASFSIRINGESKEKKVRKKLYDIFSTTDSIGKNYIKRSDENDEEIYPYVSVSFKI
PBANKA_0903600	A0A509APG4	Dynamin-like protein, putative OS=Plasmodium berghei (strain Anka) OX=5823 GN=PBANKA_0903600 PE=3 SV=1	93.5	0	0	0	0	0	0	97604	0	0	27316	0	0	0	0	4490924	0	1	ND	ND	ND	ND	33	86	33	45	MESNIYVNLRKLISVIDELRDIGLQKYINLPRICVVGTQSSGKSSVLESIVGLDFLPRGEGVVTRRPIEFRLIHIKDDSEIKHWATFEDNKNEKFTDFNKVREHINSLTDQIAGTNKGIIDEPIILNIYSTGCPDLSLIDLPGITRVPLKNSDQTDDIERLTREMAFRYVKDPRTIILAVLPANADMSTSDALQIARKVDPKGLRTIGVITKIDLMDKGVDASKMLLNDEINLRLGYTGVINRSSADIKQGKTISQSLKDELNFFQNHPVYKKLPQSLYGTTSLTDKLTKVLLRHIKNFLPDIKIEINDRIRAINDKLFSLGTNVPLDATKKTQILWSMITDYCEIFKNTLKGKYDKRLQVFIENNDIICGLKVRQIFNELLDEYAGKNVTSELSDNDI…
PBANKA_0919000	A0A509ALM5	26S proteasome regulatory subunit RPN7, putative OS=Plasmodium berghei (strain Anka) OX=5823 GN=PBANKA_0919000 PE=4 SV=1	46.5	0	0	0	60215	0	0	0	64054	0	63337	0	0	0	0	1434112	0	1	ND	ND	ND	ND	12	32	11	32	MEEYKEDNNEECKQKYPNFYLADLFYTLQLSNLSLNERNEALLKLFEEIKKNNMYPYYSYVCGELNLDMDQEMYTTLKQKADEEMKEIENKIQEASENFDYVDTKNDMLLKANFYCKIGDKENSFKEYEEVYEKGIGIGVKLDILLTIIRISIFFNDINSTKKYLEKARAQMEKGGDWERKNKLKIYEALNYIMIRKFPEASKILIDAASTFTATEIISYDSIIFYVIILGIMTEERTVLDKNILNSSVILQVTSSDEDLYNYIYSFYHCDYRTFMEKTIKIALRVKKDRYLGRHYRYFIRNTRVRAYKQFLEPFKSVTLKNMAYAFGVSEDFIEKEISSFIANGKLNCKIDKVNDSIESNQPNERNTVYQDTIKKGDILLNRIQKLSRVIDM
PBANKA_0908800	A0A509AJJ2	Histone chaperone domain-containing protein OS=Plasmodium berghei (strain Anka) OX=5823 GN=PBANKA_0908800 PE=4 SV=1	37	0	0	23873	34691	0	8946	33409	25716	23129	23281	26262	13858	0	0	786444	0	1	ND	ND	ND	ND	2	11	2	10	MDVPNEIEKIKEILDKILPERDLNLVTIKSVRKDVADYLKVDESYFTENKEKKTILKDILKDKLLKLYNEQQGGKEEEDNKSTKAESSKENEDGYKKKKYNQSNKSIKSDSKNNKKRKMNSDDFNTPSSKNMKKDKNEKKNDISDNDNDELKPKSRKKSSGSITEKNIHTIKKEKLRKIVLDLKIGPTIFKDLNKENDEEYNKKLEEKIIAFCEKKNICSETNRLPNSSEIQEYVKQLKLKEELDGIDLSNILDSSTRSRRRTPNVYVSKIVEDSEEDEEEDDEEEEDDEEEEENEEKNEDEEEDEEEDEEDDDD
PBANKA_1426300	A0A509ARY1	ER membrane protein complex subunit 1 OS=Plasmodium berghei (strain Anka) OX=5823 GN=PBANKA_1426300 PE=3 SV=1	130.5	0	0	0	0	0	0	0	0	0	0	0	0	0	0	117706	0	1	ND	ND	ND	ND	2	2	2	2	MLSIFICFIIAFLSKLSLSENVLYSNISSLVGHINFVLPVPNLISDHVLVSSSNSNIGLLNYKTGILKNVLNYKKNEDIKKVHTNDKYTFVLITNRNLQGSEKNNFPNDDTYSYINVYTGEELYLLNIIEYKNETVIDFIVIDENVYVLLNDRISIRNVNDNSINSIIFKENNINSIYSKIIKKGYNNLSLLYVDSDLFCHLVLFDTINNKIIHKKKIINFQINNKLNNHVSVINNKNAIVIYNKKDIHIIELPNQENNNNGDIVYNYYYQKVNGENKDGEIEEETHDKSNFIMDNEMENLNIDEYFVIKLGNDEYISMYKTGKHTNADDNNIIKLIKQKVGENELIGYYLDKHNKKKLIYCEDKEGKIFVKSINEQNIINKRKRGEKDNNNTIAILNK…
PBANKA_1332500	A0A509AS42	Pre-rRNA-processing protein PNO1, putative OS=Plasmodium berghei (strain Anka) OX=5823 GN=PBANKA_1332500 PE=4 SV=1	29.2	0	0	0	0	0	0	0	0	0	0	0	0	0	0	320738	0	1	ND	ND	ND	ND	3	3	3	16	MTKRIIKNSATIRDDRKNVTKEKIEEKDNGVNGEETRNVLTLENILQDNDTDNNKKVKNKLIFKNIKKNNDSSINKNEMRIITIPRQRISSVKNNWLELIKPIVTNLKLEIRMNKDKIEVRTCKLTEDKNNLQKSSDYIKAYLLGFSIEDALALLRIDDLYIESFQIKDVKILKGDHLSRCIGRICGSNGSTKYAIENATKTRIVIAGDKIHILGSFNNIKMARYSICSLILGSTQGKIFNKLNILAKRLKERF
PBANKA_0826700	A0A509AIY5	Parasitophorous vacuolar protein 5 OS=Plasmodium berghei (strain Anka) OX=5823 GN=PBANKA_0826700 PE=4 SV=1	25.2	0	0	0	0	0	0	0	0	0	0	0	0	0	0	535066	0	1	ND	ND	ND	ND	3	3	3	24	MKFYSIFAIVLSLSFIGASNNNKDSPANPTPDNPNNDGNVHILTKDIDLKQLQGTYYEIATNASDKIFPGLLCRCTKYDFSGLRRDGNSAYILINFACDRNFIFGEKKSEMLFKLILNKPVDENTTVVDEFNSSIYIVQGNQQILLNSNLNIIYAEMNEQNEYEHIIIAGNKSVEPMIILSKYRTILLETYNKLLNALYVAGYDPSLLNWPFILQTDQTFCD
PBANKA_0616100	A0A509AHY8	Prefoldin subunit 3 OS=Plasmodium berghei (strain Anka) OX=5823 GN=PBANKA_0616100 PE=3 SV=1	22.3	0	0	0	0	0	0	0	0	0	0	0	0	0	0	355718	0	1	ND	ND	ND	ND	3	3	3	21	MSFDDLTDNTRSVRNIPGAKFIEHVTEFLQNKNEETILRLAKELLLKYKFMEHTFVTRQMNTEKKIPELKDALKVVNTLYKRKQMNETAALEHYFPLEESLYAKGVIEKCDNILLWLGANVMVEFPFNEAIELLNQHLERAINLYEEMDKELIWLHEQISTTEINISRIHNYVEMKKGNKEKNPIETKG
PBANKA_0314500	A0A509ADK5	40S ribosomal protein S26 OS=Plasmodium berghei (strain Anka) OX=5823 GN=PBANKA_0314500 PE=3 SV=1	12.5	0	36394	24479	0	45845	0	186199	55607	22580	24478	61794	0	0	0	828566	0	1	ND	ND	ND	ND	3	21	3	31	MPKKRRNGGRSKHNRGHVNPLRCSNCGRCVPKDKAIKRFNIRNIVDTSAQRDIKEASVYSTFQLPKLYIKQCYCVSCAIHSRFVRVRSRQQRRVRKETTKHAHVSQL
PBANKA_0105500	A0A509AGR3	Glutaredoxin-like protein OS=Plasmodium berghei (strain Anka) OX=5823 GN=PBANKA_0105500 PE=4 SV=1	25.3	0	0	0	18134	0	0	0	0	0	0	0	0	0	0	700928	0	1	ND	ND	ND	ND	5	8	5	28	MKFITETDRANLEKSGGLKLFYTNSNQSKEYESHINVLKEIAEDYEEIKIYVINMNGNNNSYGFEFYEDTKLLKGFTNCHIGAITSFLRKYMSSCNYGVREMENDNENDEEKINKKIENLLKSNKIILFMKGSKTFPQCKFSNAVVFMLNSLKIKYNTYDILQDEDIRSQLKIYSNWPTYPQLYINTELIGGHDIIKSMYDTNELKEIIPSDCFEV
PBANKA_0405400	A0A509AG75	40S ribosomal protein S12 OS=Plasmodium berghei (strain Anka) OX=5823 GN=PBANKA_0405400 PE=3 SV=1	15.5	0	0	0	0	0	0	75631	0	0	17266	31253	0	0	0	2926104	0	1	ND	ND	ND	ND	12	23	12	81	MADAESVDNNVVIEEKAVFDNVTAIQKVIKNALVHDGLKIGIREVIKSIESKEAKVCFLSNVCSEPAYKKLVTALCAEKQIPLFMIDNDSKDLGQWSGLFKVDKEGNARKIIGASSVAIIDFGEESAERDFLMSQKPTATAA
PBANKA_0401100	A0A509ADR3	Serine/threonine protein kinase, putative OS=Plasmodium berghei (strain Anka) OX=5823 GN=PBANKA_0401100 PE=4 SV=1	153.6	0	0	0	0	0	0	0	0	0	0	0	0	0	0	371482	0	1	ND	ND	ND	ND	5	5	5	5	MSYSDSISASNNSSNQDATSGKLQYTESDDEGSDEYCPGGYHPVEINEIYNDRYRIEGKLGWGHFSTVWIATDLKSKPLKFVAIKIQKGSETYTESAKCEINYLKTVKINSFDSSWVEFKEQQRERLFHYNMTKGVVSFIDSFEHKGPNGTHVCMVFEYMGPNLLSLIKHYDYKGIPINLVRKIATHVLIGLQYLHDVCKIIHSDIKPENVVVSTLTNIPKPRDYTKSKLANNNDDTNIKNVTKNHCTSPSRPEQENNINTEKDFDKVEPQIDETKQGETEQDDTESNATAVKEQNEFDNVDWNKLTKNEKKKLKRKKKKMFKKERLKMNEANNTEKNQQTNNEAKINNLSHAEDNRQFKKEDNENFRNIECIKTDDISLEQIQISTKMTPNNSMNANP…
PBANKA_1341500	A0A509ASD2	RNA-binding protein, putative OS=Plasmodium berghei (strain Anka) OX=5823 GN=PBANKA_1341500 PE=4 SV=1	59.4	0	0	0	0	0	0	0	0	0	0	0	0	0	0	355768	0	1	ND	ND	ND	ND	3	5	3	10	MESNGNDQNVVKNKSEESYDERDSKYKSHIGRHSKKGNSRKRSRSKSNQRNSSIANNQDDSKSDIQRKKKSDAKSESNENSEQVESEKSNNSSSDEYKKRRRHNREKKESRRSIERDSSRGRYNRRDRDMDRDRDRDMDRDRDRDRRRKRRPRLNRNISSSHERSRSRERRRRRLQAECIRRAGGFKKLADMEGHETTNVFWDGFQWVAKTNNNNSNQLDPAIMNSTRKLRRLYFGNLPLHLGLTENAFQEIVWDEMKKRKFCNNENINPVLYVWFAKDKGNYGFVEFSTVEETEKALTMDGMLCKGVAIKISRPNDYSTSSVKNNQNILMNKQNVNLLAAISANIQTGLKPSINSTDTNVILPNYSNGEISLYGNKPLPPPGSPPLSVLKEMNNSNIQ…
PBANKA_0605400	A0A509AIY2	Heptatricopeptide repeat-containing protein OS=Plasmodium berghei (strain Anka) OX=5823 GN=PBANKA_0605400 PE=4 SV=1	80.7	0	0	0	0	0	0	15884	15281	0	0	0	0	0	0	472677	0	1	ND	ND	ND	ND	6	8	6	12	MFKGQKATILDFNTVKGYYNKVFTNKLVLKLQKDIKIENLIFSYSYYSNLGTENSKFDNYEISSDYLKSDEIDQSNSNSFYRDKKFRIENEEDEPINYFDPNVSEQLFDEKVKKTFEYLNNFLKSFYTENFSNETNDTEKINYVIDTIRVEKENDENYKICDMEFDKSQISQITLIIIAYIIKKIFDLSLGRKLIFSNENINKVLLKAIYMQNIYIQIFTLKNLKKYLTEDGEYYETTHLKMIKICIFSKSLCSFNRANDIIIRLIKENKQVNEIFDYYFLKKLKKNLEQSDNIQRLRLLDLVIDCINLNNSYVYEVFKLEHKPQNYSINYEQKIKDFENLIHNLYTNNNIQNFETSYNFEDKPNHTFDDVSFIDKEILKYNMDKNNLNINDICNLIKI…
PBANKA_1022100	A0A509ALB4	Uncharacterized protein OS=Plasmodium berghei (strain Anka) OX=5823 GN=PBANKA_1022100 PE=4 SV=1	110	0	0	0	0	0	0	0	0	0	0	0	0	0	0	337970	0	1	ND	ND	ND	ND	2	2	2	2	MQIKIKDVKHLIESLKINKEKEFEKDLKILLEINSHNYRASSQNESKQNSFLNDKQLNSYIAYIETIKDNIKSKTVFENSYFGNILNCYHKSEEYNNVMNFNTNNNIKNDKNSIYNKNLVNFFFMYLIRKYSEIEYYKWLHSDFTKKKLFNNIDENYTNNYLNSYICLLYIYSKIVGYILLKNEGINTNLIQFCKKILLKTSEELESLFKIRKKDIHSNLTLNNVNLIKYAYFIIEILCKNNSTNYLSILYVLYSFVYILSNFFYTCSLGINTENFEKQIQSNINTDNTITNSGNKNVNNLDKKEIFHNSNSISLHYNHMRKYGESKFMELNEMMLYFISKKKLEQSDCNFENIIKDLNILKYATYLKKNIFSEIFMNNQNNYKEISTKYEIIMNEIFR…
PBANKA_1456100	A0A509ARE9	40S ribosomal protein S17, putative OS=Plasmodium berghei (strain Anka) OX=5823 GN=PBANKA_1456100 PE=3 SV=1	16.1	0	0	0	0	0	0	60723	0	0	29016	53123	0	0	0	2479444	0	1	ND	ND	ND	ND	7	22	7	51	MGRVRTKTIKRAARQIVEKYYAKLTLDFQINKKITEEVAIIPSKRMKNKVAGFVTHLMKRIQKGPVRGISLKLQEEERERRLDFVPEKSQIDVNVIYVEPDTVKMIKSLGINISNMKIHNPMINTNHQKQNRMNTQY
PBANKA_0803000	A0A509AIK1	Origin recognition complex subunit 2, putative OS=Plasmodium berghei (strain Anka) OX=5823 GN=PBANKA_0803000 PE=3 SV=1	91.6	0	0	0	0	0	0	0	0	0	0	0	0	0	0	312285	0	1	ND	ND	ND	ND	2	2	2	5	MLKSIEVHSPKKIIKLDNGDEGTKKENEKEEYLITDLSGNNKNMPSLIIRIPSNINKFLSKEEIKIKYDKNISLPTDNLNNGLSSFKVDSSPFTFYENSYSTIDPKVDLTYPSDTNISFGSSTIGSNLIRNVELKNDTYIDNTVNIINSEDTCDNAEINEFLLKDFKNNYVEKYEANACNDNIEFLRGHIKNELEYFLKNKKHNICGEMKINDIINIDYDKINEKNIIPYFLTNMFDQEQKKKREKMKLQLEQQRKIMMEKKRNERVNKKNMNKESTLKKKQSKNLNLKKEKTENLKENTKKKETGSETNDDEEEEESENYDNDIDESDKELDINIYNDPTKYGIEGSSDYSEGMKSELDNSQDEENTTNDQSNNTNLKNKKSKKQQKNKNSNNYDEGC…
PBANKA_0101000	A0A509AE05	MYND-type zinc finger protein, putative OS=Plasmodium berghei (strain Anka) OX=5823 GN=PBANKA_0101000 PE=4 SV=1	30.7	0	0	13559	0	0	0	59633	19682	0	0	0	0	0	0	1452573	0	1	ND	ND	ND	ND	9	24	9	46	MTDDILKCVHSEFKYVLISSDINNEIKELKFKGAEEKFQSTLSSYFRRIIFDEKGKYELKETIQEKLKENTNNNKKDENEENDENKNSLNTISPDLINTAIESSQTYQIIPLTVPTEKNNYYAINCYIDDIGRIKKLPYNSRASRICSTDIYGDAFLSKTYDNEDFKRCDFTIQEYEEFLKNPPKAENRWNQAQAMQDLLRQMKDQKEGVANTNASVAKPITCEHCYKEEKALKRCGKCKKVYYCSVECQRKDFVFHKRICS
PBANKA_1127000	A0A509ASR3	Choline/ethanolaminephosphotransferase OS=Plasmodium berghei (strain Anka) OX=5823 GN=PBANKA_1127000 PE=3 SV=1	44.5	0	0	0	0	0	0	63813	0	0	35302	0	0	0	0	707230	0	1	ND	ND	ND	ND	2	5	2	5	MGIIFKLNKNAYSNCKSYSYKRGGHSLFEKLCEPYWNFCVKLIPKSVTANLLTLLGFICSTLAFFLMYMFDINNKKYDHIYIYMGILLFLYSTLDSIDGKQARRTNTSSALGQLFDHGCDAITSVLFIIVGVKSMGLTNGCALFWIIGYIQLLTYIVSWLEHYTKTFNTANGPFGVTEITFFGIALCVFRGLKGPGIYQKLTFKNIIPAKIHSFFGYSLLSLSLSTILIVVSFLSIAPSIANFIYKGITNAKKKKKEASLLLALYAGFILSEYYFYRTTITPQNELICFLILAIYSAFYTLHMHLSTLLKIKMPYVPIPIIVYYTFVALLFVKRTMKPKFLNVAALTENNILYYILGFGLFYLFDYSYTVITNICKELGISFLFVKRKKK
PBANKA_1004000	A0A509AKU4	Cytosolic glyoxalase II, putative OS=Plasmodium berghei (strain Anka) OX=5823 GN=PBANKA_1004000 PE=3 SV=1	30.3	0	0	0	20280	0	0	21937	0	0	0	10599	0	0	0	1124908	0	1	ND	ND	ND	ND	7	13	7	44	MKPCAQVLVVPSLEDNFAYVIIDEKTKKAACFDPVEPDKILKKIENLNVDLEYAFCTHHHYDHSGGNVRIKELHKKIKVIGSAYETTPGATEKAYDSQIIRLGEICIKAIHAPCHTKGHMMYYAYKMDETKNEDLTCAPILFTGDTLFIAGCGRFFEGGAKEMFKNIEKAKTLRGETLIYCGHEYTLNNLRFALSIEKENEDMINKMKEVEELLKKKKHSVPSTIKDENLINPFFRTNFYIEKYNTKDEVKILNKLRELKNYF
PBANKA_1116800	A0A509APE5	Nuclear segregation protein OS=Plasmodium berghei (strain Anka) OX=5823 GN=PBANKA_1116800 PE=4 SV=1	53.3	0	34400	95691	76726	0	48896	383304	341960	60061	219805	170019	0	0	0	6900876	0	1	ND	ND	ND	ND	26	123	26	49	MTEAENSKIEKPNFDAYNEKLGSISEAIDQIKKKIDNLQKEIKIANKGKEEYNKKKKDIVTKIDSFQNEIDKLENERRGILDDIEQKQKHKKELRVNAQNIKKQIGFENEEDIEKKIREIENKLMTSTISIKEEKLLINQIQALNKNIPLFSSYSKIENEANKYDDEAIVPLKSKMDEIREKINKLRNEKKNERNKLKELQNSYQERNNKLNELNNLRDNYSKKMNHYFMERRSITVEMEEKKQQYRSYKINLLQAKQQKLKEERERKNLEFEKQNLEKELEDIDALPYREELALIENMLAYLKKLQDEAKMEETKKQQNLSNKKVNGEVEKTNENDMEEENNKAKNENKKGKNKKDKHKIFKLDMNILCYFVTAGITPPVSFDEIDSCISKLYEKKDM…
PBANKA_1006100	A0A509AMI4	Flap endonuclease 1 OS=Plasmodium berghei (strain Anka) OX=5823 GN=FEN1 PE=3 SV=1	54.5	0	0	0	0	0	0	0	0	0	0	0	0	0	0	1055093	0	1	ND	ND	ND	ND	3	3	3	9	MGIKGLTKFIADTAPNAIKEIKIENLMGRVVAIDASMSLYQFIIAIRDGDQYGNLMNESGETTSHISGLMSRTIKLMENGLKPIYVFDGAPPELKGSELEKRGEKRQKAEELLIKAKEEGNLEEIKKQSGRTVRVTKKQNEEAKKLLTLMGIPVIESPCEAEAQCAFLTKYEMAHATATEDADALVFGTKILIRNLNANASSNKNKNKNSSKRGYILTEINLEQVLKGLKLTMDEFIDFCILCGCDYCDTIKGIGSKTAYNLIKEYNCIENIIKNIDQNKYQVPANFKYVEARQSFIKPKVLEKSEVKIDWCEPKIEELKKFLIKEHNFNEVRVTNYITRLLKARKVTTQRRLDTFFTTCTKKSTKLIIEENQKEVLKTKSKGKKREINNDNSTKLNAK…
PBANKA_1364300	A0A509AR17	glycerol kinase OS=Plasmodium berghei (strain Anka) OX=5823 GN=PBANKA_1364300 PE=3 SV=1	56.5	0	0	74713	178659	0	0	120330	168016	27908	110380	0	0	0	0	2529822	0	1	ND	ND	ND	ND	26	91	26	68	MNIILSIDQSTQSTKVIFFDEELKVLHMNSLNHEQKCFKPGWYEHDPEEIIANLYKLMNEGINVLKEKYKTVVIKCIGITNQRETVIIWDKETGKPLYNAIVWLDTRVENLVTEFSKKYNNDYFQKKTGTYFNTYFSAFKILWLIKNNKTIKEKVKNGTAMIGNINTWLIYNLTKGNCYTDVTNASRTLLMDISTLQWDPEMCKMFGITNMYALPEIKCNCYNFGLVKSEKVPDYSNVPITGCIGDQQSACIGQAIFDEGEAKCTYGTGVFLLVNTGNKIVYSSCGLITTVCYKFNDDDKPNYALEGSIGTAGSGVSWLENVNLIKDTSEVNDIMENCKDTEGVVFVPAFGGLFAPRWRSDARACISGMSFNTSKAHIVRALLEGIVFQLSEIVNSLTS…
PBANKA_0511200	A0A509AE57	U3 small nucleolar ribonucleoprotein protein MPP10, putative OS=Plasmodium berghei (strain Anka) OX=5823 GN=PBANKA_0511200 PE=3 SV=1	80.3	0	0	0	0	0	0	0	0	0	0	0	0	0	0	179548	0	1	ND	ND	ND	ND	2	2	2	4	MDEVRIKKYTDLISSFEKKSKLELNSKKGNTEDKTNLLEMIEYFSNTLVKYFYNEKEMDDILISNSDLDYEQLWYFIECLIKEKNLENLSTFFNNFEKKIDKEIEDTRGKNGKKKNHKKKKKVTFLDHQIDQENQIDQAKNTKRRKVTKSKMAKESEEEEDGEKSEEKDKFFNYEEMQKFADMQNDQIIENSDDVESENFSDDLDLNQFELDHNQVGAIKYSDFYKGEEEEDEEEEDEEEEEEDEEEEEDEEEDEEEEDEEDEEDEEEEDEEDEEEEEDEEDEEGSVDMDMEMHAKAQNKSEKSKKLREDADKRLERNLEEMNEYTNKYFDTETNEFEKEKIEKEEIEKELVAKKHWSLTGEVTGQDRPKNSILALNVDIPKVNTHKNDTFLNKTVGKH…
PBANKA_1210900	A0A509ATT9	Phosphoglucomutase, putative OS=Plasmodium berghei (strain Anka) OX=5823 GN=PBANKA_1210900 PE=3 SV=1	68.1	0	24137	34698	242821	0	0	29448	130634	0	24324	18187	0	0	0	1049768	0	1	ND	ND	ND	ND	15	54	15	37	MNKIKSPELLKSIELWNLFSKPKYLSDQTEEVINNYNEEELNKLFLKRLNFGTAGLRGKMGVGFNAMNVVTIIQTTQGLCEYLINKYGINLCKNRGIIFGFDGRHNSESFSHVAASVCLSKGFRVYLFGQTVATPILCYSSFKKNCLCGVMITASHNPKLDNGYKLYGENGAQLISPVDKNIYNCILDNLKPWNDIYEYLNEDFYLKDKSLVEDIYHEMYDLFTSDLKSEFNFSYCRNSRTKLVIVYSPMHGVGRKFVQGIMQIVGYNNLLTVPQQALPDADFPTVTFPNPEEKGALNLSIELADLVNSPLVVANDPDADRFACAEKYNNKWKIFSGDELGIIFAYFIMKQYEKKNIDKSKHVFLCTIVCSRMLKTLCQKYGYMYDETLTGFKWLINKA…
PBANKA_0942400	A0A509AKB2	WD repeat-containing protein, putative OS=Plasmodium berghei (strain Anka) OX=5823 GN=PBANKA_0942400 PE=4 SV=1	67.6	0	0	0	0	0	0	0	0	0	0	0	0	0	0	197996	0	1	ND	ND	ND	ND	3	3	3	7	MGIRNWLSSDDYMFEIKNNENLFENKKLEYNVKPVWSFKGHTNSVEGIHFVEKNRFVTTSHDNTISLWSLEYKNRIKNINLYNPILCSSYNSKEKNLCVGTTNNNDNIYLINIKQIEEERIEKKNPQKNIGEKKSIEVYSSNCASIFCINYFDDDKISYGSKDGCICLLDLNNKKNIYKYEEIKEDCQNFCTYNENFKFHIFSTYKGKVLFIDSRQQNNPIYINENLHSKYSINTIFNCNNYIYTGGSDCLIKKFDIRCLEKSHPIEIYVGHTSPIRSLAFSKKYGNFFCSSSDNGCIKLWKSNKSFSYTNKYAASLSCSASVFDGTSRIISVKSDASKIRKASKNFLELNKIKVSNKGSSSIISEDDNKKISESIKLINKSSNYNISTNKIIGSEKIN…
PBANKA_1018500	A0A509ANA0	Nascent polypeptide-associated complex subunit beta OS=Plasmodium berghei (strain Anka) OX=5823 GN=PBANKA_1018500 PE=3 SV=1	19.9	0	0	166676	134347	148916	0	47063	0	0	183394	57991	0	0	0	4334978	0	1	ND	ND	ND	ND	8	36	8	52	MEKISPEILAARAKLKERMGASQRQIGGKGTARRKIKKVHKNSMPNEKKINLILKKIGASYFGDVDEICIYKNSDKYLEFKRPKLSASLQSNTYIVTGKFTEKTIDINKIFEGLQGNKNVDMKLLERLKNDPTIKSLMAKDKEKNKKKEDIEQSAEIPDLVEDFEEVSKEKTEE
PBANKA_1309400	A0A509AVZ2	RNA-binding protein, putative OS=Plasmodium berghei (strain Anka) OX=5823 GN=PBANKA_1309400 PE=4 SV=1	63.2	0	0	0	0	0	0	0	0	0	0	0	0	0	0	161526	0	1	ND	ND	ND	ND	3	3	3	11	MTDIQIQNQNNNLGTNKKEFDHRFDDKPLRILCVKNIPKETTENELLELFKPFGSIENINLKVNKNVGPYAIYAHVYFSSPEEAKRCLKQMNGKILNGRALRIDYKKNHAKLGDGEEDNNNYNNMGNNNLNNNNKFHKKTNRTNQVYNNQLYNNRYVNNNKRPMRNGFIIGDGLINQHETDINYSREYEPNKRMRMGNFNDPPNINNINNDADLNKLLREYENKKDSNNNEVENIIQTLINGMTHKMPRVKLFLCDHLRKCVQHVFNRPCINITNNNNLNNLTNLNNIPFPGPNHEHKNNIISNLQNYQSINEFEKEKIYNNSNTILWKGVLEMKNKDSLSINAYGLNGDVNNFLNNNIKNIIISHRKKMKNLPKIEAIYHFEIQNEKDINIFESYKNY…
PBANKA_0906300	A0A509ALP8	Methyltransferase, putative OS=Plasmodium berghei (strain Anka) OX=5823 GN=PBANKA_0906300 PE=4 SV=1	62.6	0	0	0	0	0	0	8480	0	0	0	0	0	0	0	362342	0	1	ND	ND	ND	ND	5	6	5	14	MEEIIDDLIYYVRTDEIDEIQNILETESIKTINNIKDQNNNSLLHFACANNNVDMIRFLLYECSIDYNTFNNSGNSPLLWAIQNKNFEAIKEVLFFDYYLNKFEYIAIEKKPNELYENIFKDINCPTFLKSNYKLNEEIKKKINAINILDYFIFLHTNEKFENNSYPNKCQIDLYKERNKICLLKNNEFSKNILSESFNIQNENILHLILNHPMSSILDNQESIENNPNLKFNNTLNQINNQEINDNEKIKENDFTSNISEAKIVQEHIHELIVNQTVKINEKNVIIKIREIGLNYFGKCLDENNLENDITGINIWECSIIASKWIADICIQDSSIFSNKHILEIGAGCALNSLSLFIHSNILCNANSSLGPANIVISDINEFTLNNILYNIQINKELL…
PBANKA_0928200	A0A509AJX7	W2 domain-containing protein OS=Plasmodium berghei (strain Anka) OX=5823 GN=PBANKA_0928200 PE=4 SV=1	93.7	0	0	18444	24100	0	0	80638	70614	0	0	0	0	0	0	2176803	0	1	ND	ND	ND	ND	19	33	19	39	MAKKKKQIHLNIIDFQKYYQKDDLIIQPTPVVENTIEEKKKKIFEKNEYVQNIEWRTTESPDKKINNKINDDNNQFKKSDSTIILGSRGKNKLTDTKEDVDFANLRNKKNEEDVDFANLRNKKNEEDLDFANLRNKKKEEDVDFANLRNKKNEDVDFANLRNKKKEEDVDFANLRNKKNEDVDFANLRNKKKEEDVDFANLRNKKNEDVDFANLRNKKKEEDVDFANLRNKKKEEDIDFANLRNKKNEEDLDFANLRNKKKEEDVDFANLRNKKNEEDLDFANLRNKKNEEDVDFANLRNKKNDTETKIEKPYHLKRLEELRKQKQLKRQETDISQNVKLEENGKIYEKGEVKVDEKKEVKIDEQKEEEVKTDDTIKSTEETKPKESAKPEPIAEKSEI…
PBANKA_0202300	A0A509ADX0	UMP-CMP kinase, putative OS=Plasmodium berghei (strain Anka) OX=5823 GN=PBANKA_0202300 PE=3 SV=1	43	0	0	0	0	0	0	0	0	0	0	0	0	0	0	548458	0	1	ND	ND	ND	ND	3	3	2	11	MNIKKIFIKFFFMVTVVFSHFITKNICYSNKKKYIFFLNRTNAHNNSIVYTLKNTHWKNNIRRVKHFNKLFFEKKLFYINKSVERIFFANNIFRMDMHQPFVIFMLGGPGSGKGTQCKLIQENFNFIHISAGDCLREYLIKCEKNETDSKYKEIVEDSIKNGKIAPAEITIELMKHKMKDEINRMKKNEEKCDNEDVEKLNSFSFNLLDEKINLENTNIDENSDNLKYENNIYENNYVLDILKKNKTLKKAKYKFIIDGFPRNYNNLDGWINIIKNYAYVHLCIFLYCDEEHMIKRCINRGLISGRVDDNINTLKKRFEIHNKGCIPIINLFLSENKCIFINANKTIEGVWADIKYVFENM
PBANKA_1014600	A0A509AMU0	Serine/threonine-protein phosphatase 2A activator OS=Plasmodium berghei (strain Anka) OX=5823 GN=PBANKA_1014600 PE=3 SV=1	37	0	0	0	0	0	0	0	0	0	0	0	0	0	0	293970	0	1	ND	ND	ND	ND	2	2	2	6	MEDSNLSFKIINDEGVKKFMNSQIYQDIINFISDLNTSVIGVEMKPLDKFVLKVENNTNIDNILFLSKNVYNILQLIKSMNICIDKCPPIKHPTRFGNKAFPMFCDEYYKEVDQQLPNILKASGISNISEHTYQLSFYLKNSIGNKKRIDYGTGHELNFLLFLFCLNKLTFFSPPDHRQLVLVLYRQYLECVRQVQVIYNVEPAGSRGAWGLDDFQFLVFLFGAAQLSYNKEIQTNDVEKRELVELWAPKYLYFDALKYILMLKHAPFHESSQMLYDISGVKTWEKICSGLLKMYQVEIIQKRQILQHILFGKLIDF
PBANKA_0508100	A0A509AG56	SNF2 helicase, putative OS=Plasmodium berghei (strain Anka) OX=5823 GN=PBANKA_0508100 PE=4 SV=1	304.5	0	0	0	0	0	0	0	0	0	0	0	0	0	0	555194	0	1	ND	ND	ND	ND	10	10	10	5	MTMMNNNNIVNNDNGTISITSSLLSNNDKNMNIKSKLGINKNGNVGGGLHESYQKSMLSSYNMSNVPMPSINYHANNNVMNRYNPMNYSLQEMNPNMQMTNNSMKQNSMQSNDLLLKQNNKDQNYMYYQRNNSNNFNNMHGNFYPYMNNGFYGMSSANCFKPNSTNITNNNNNTNNPSMNNFNQINGSFPYDNTIRSGVGPSTTSGGINNTISSNSNNNNPNFLNTLNPVNYGDNINCNSMNNIPNKDSENLDKSSQIKSLSNNMNANNLNMSHYVNNTAVTSGTNNNSNNNGINSNVKDNMSKMTNNNFKGIGSICNNIPPYRLNSDPQLDKQHNSIDDMNNNNNNNNTRSHPMNMYNRMEYGYDNFKDENILDKDKANIDKSSNSNNSNLLGENKTN…
PBANKA_0417500	A0A509AFS7	60S ribosomal protein L32, putative OS=Plasmodium berghei (strain Anka) OX=5823 GN=PBANKA_0417500 PE=3 SV=1	15.5	0	0	0	0	0	0	47014	0	0	0	0	0	0	0	766437	0	1	ND	ND	ND	ND	2	5	2	18	MAVKKVGKIIKKRTKKFTRFQSNRFMRVKPAWRKPRGIDCRVRRRYKGTNLMPSIGYGSNKKTRHLLPNNKYKYIVKNVKEMEPLIMNNSKYCVEIAHNVSSKKRKEIIERAKQMNVSVINAKARLQKTEE
PBANKA_1028700	A0A509AL18	26S proteasome regulatory subunit RPN13, putative OS=Plasmodium berghei (strain Anka) OX=5823 GN=PBANKA_1028700 PE=4 SV=1	29.6	0	0	0	0	0	0	0	0	0	0	0	0	0	0	429497	0	1	ND	ND	ND	ND	2	3	2	8	MDLGKIYIEINAGKCIYDGNVVKPDKRKGKLVLYKICDNLYNFQWISRETNKIEDNVILTKNISLERVHACKTGRVYLLRNKLKGEVFFYWMQDCDESKDEEFVSKFNSIIENDLGNDTRTRRRYNKNDIPGVSDLMFSQGRYEMNGNSKKNVSFKDLFVSEYMSKLLEIPEAYEELKKHMPNGYQTKYDIESLINSRMLNSNLNCLDLSIQTQLNFILVSLNLPPHDEPINNPLEYIVEALEKKYDKENNN
PBANKA_0103900	A0A509ABK2	RNA-binding protein, putative OS=Plasmodium berghei (strain Anka) OX=5823 GN=PBANKA_0103900 PE=4 SV=1	82	0	0	0	0	0	0	13415	0	0	0	0	0	0	0	1524290	0	1	ND	ND	ND	ND	13	29	13	20	MIKQKRSYSHMENDEGVDPNNNSEGEVSFKRQRNNSHSSNMTYGSMNEEYENGDKNNKLHSGNMEMLIPYCILLPNRAIGYVIGKSGNNVREIEKVCDVIIKCQKEFDISVYPPPSEKILTVSGKKENKKKALELVLNKSKTVMDFQEEDGKESIVIIVPTRSIPIIIGQKGSKISSLSERSLCEINVHKDDVPGIKDKAIFIKSNQITKIIDCISIIYDLLEEVTENGILEIAEFPGVSKNFTSPINIGLCGPPPINGPSSFHENSTANGVSGVSNHYNDTHSMNSGTNQFRGSRNNNMNYNNNIGNNGSKFSMKNKENNYYDNYSNNNMDDYDNFSVPREKNLLLHKFGKESSSCVIRFVLDVETTAWIIGKAGCHIKEIRTITGAGAVIVDAPDNI…
PBANKA_0824600	A0A509AHN1	Uncharacterized protein OS=Plasmodium berghei (strain Anka) OX=5823 GN=PBANKA_0824600 PE=3 SV=1	31.5	0	0	0	0	0	0	0	0	0	0	0	0	0	0	328814	0	1	ND	ND	ND	ND	3	3	3	15	MVLIYVKMPEESHSFLYETNVNNLIKNLKEDLINIYNLKCKILKLLDASSELAKHGPLRPEEFRGLSECDSYNSNEVTCPDANNFRTGIPPPKDAAIKLINLVDKMKRQLVEHGQTNEISLSNLNKDLNLIVQTLKICYPVIEILPSYEPTRLILEKENYFNDELVPNETSMWWAGKELGENLYLKNIIGKNEKTKIIVKLNPKKMGPPEREPRIDNETYKAMLAYYHKKKKEEKEFEEDDDDSYLNSEWASPLSLQKQLLGNLHDLKWKP
PBANKA_1324400	A0A509APY8	60S ribosomal protein L27, putative OS=Plasmodium berghei (strain Anka) OX=5823 GN=PBANKA_1324400 PE=3 SV=1	16.9	0	45406	49714	0	0	0	88867	0	0	0	95459	0	0	0	2778646	0	1	ND	ND	ND	ND	7	22	7	54	MGKLLKPGKVVIMLNGRRAGKKAIIINTYEGQTRERPYSYCLVAGIEKHPLRVTKKMSKGKIIKRSKVKAFVKYINVNHILPTRYQVANDFDIKSLASDDILRSKNKKKEIKKLGRVFRDKFLDPINKKTGEVSKDVSFLHKKLYF
PBANKA_0104400	A0A509AAB1	Nucleoside diphosphate kinase, putative OS=Plasmodium berghei (strain Anka) OX=5823 GN=PBANKA_0104400 PE=3 SV=1	196.3	0	0	0	0	0	0	0	0	0	0	0	0	0	0	253639	0	1	ND	ND	ND	ND	3	3	3	2	MAEEKCIFIILPDVTNNFKDDEVIEKLEEKNFIILNKKKVHLTKFDIKEIFTYKPEQYNNIDDFYEYIESGLSVICLIESRNGETRTKLSHLVKNTSIIIKDESYFECLEYQCNLQCKDIPFYFSKNEWYFIRDINYFFPPLDKTNLERNLIIIKPDVIEKNKISDVINDILNFNLLIVSVKREILSIEKAKNIYKELVDKPYYNSLVDFMTSDKGIVCLIIEGMNCIRRCRILCGESLSKMDFENIPIECLKRKYGTNEIMNGVHIPDDCKIGKEINMFFSKSQFRNENGILVIKKSILNPKKLTILRMYLKNYGFNILEEKIVRTSKNILNELEKEGINKIVNWDKEKFMIIIILSRINCITCLFYLMGSKNVNESKIKRPNSIRSIFCINNDDIIL…
PBANKA_0316800	A0A077X8I8	Erythrocyte membrane associated protein 2 OS=Plasmodium berghei (strain Anka) OX=5823 GN=PBANKA_0316800 PE=4 SV=1	45.2	0	0	0	0	0	0	0	0	0	0	36401	0	0	0	1380943	0	1	ND	ND	ND	ND	3	8	3	10	MNYKLIQITSSLLLMCLCEAYSNEKNNNNGTIFTKSNRLLSEPENNEMGEGLYEENVSLYDDKEPISGDQESIFEDQTNNEDQPIFEDQTNNEDQPIFEDQTNNEDQPIFEDQTNNEDQPIFEDQPIFEDQPIFEDQPIFEDQPIFEDQPIFEDQTNNDDQTNNEDQTNNEDQPIFEDQPIFEDQTNNEDQPIFEDQTNNEDQPIFEDQTNNEDQTNNEDQLIFEDQTNNEDQPIFEDQTNNEDQPIFEDQTNNDDQTNNEDQPNNEPVMKIYVPKDPPFAKTKINTTPKPNIRTGIPPEHIQIIEMPFRSPTPPPPPVKVTYKTSVIPKLKLKKPSQPVDNSCDMYPNSKEIEDDMIEWDNFIYVIDNVDSDDPGLEDYLKDKVYP
PBANKA_0832200	A0A509AIY0	PUB domain-containing protein, putative OS=Plasmodium berghei (strain Anka) OX=5823 GN=PBANKA_0832200 PE=4 SV=1	35.8	0	0	0	62969	0	0	0	237603	0	0	0	0	0	0	178159	0	1	ND	ND	ND	ND	5	12	5	21	MEEHNKIIDQLIELGYSKEISMRVIKMSEAKTVDEALSWIELIEENPDVVNSKLNTDNKAENVSENVAIDKNIESTKEQKPKLTPEEAQKKAIELQKKIREKKLQKEKEEEIEKEKKRIAMTKEIQKRKEQLEEYERKKYIENLERERNEYKKEKQKQLELLKREYEAKFSMAYNPDSQKKKSIEDLGENQKRDEIAILFNNLKNKHKNNKTELISSLNILRKYFSNIKDNILEKKFQKIKKENKVFIEKIKIYEEMITIFLLVGFEDTGEFYVIKNYPNTYLLSSAIKFIDLVIKNLNS
PBANKA_1030300	A0A509AL62	Nuclear transport factor 2 OS=Plasmodium berghei (strain Anka) OX=5823 GN=PBANKA_1030300 PE=4 SV=1	14.4	0	0	0	0	0	0	0	0	0	0	0	0	0	0	541123	0	1	ND	ND	ND	ND	2	2	2	18	MDMLNPQFEAIGKEFVNHYFQLFNTGRNELASLYKDISMMSFENDQCRGTNQIIERLNKLPPTVVHKCLSLDIQPTPNNGILILVCGDIIIEENKPLKFVRTFHLFPLPSGGYFIFNDLFRFCIS
PBANKA_1318900	A0A509ARQ1	Methyltransferase, putative OS=Plasmodium berghei (strain Anka) OX=5823 GN=PBANKA_1318900 PE=4 SV=1	23.8	0	0	0	0	0	0	0	0	0	0	0	0	0	0	864626	0	1	ND	ND	ND	ND	3	4	3	19	MAVYGNISYWNERYTKEEEQFDWHQKWYGVKHIFDELNIQNNAKILNIGCGTSKFSEEMLDSGYTDITNIDASSVCINKMKEIYKDKPNLKYLQMNVCDMKLFKNAEFDLIIDKACLDSIVCSEDSLKNVEEMLCETSRVLKSEGVFIIISHAQPSYRLGYLQKQDYKWNVTVKTVKRPMLGIVAPPIDDSLHYVYICTKGNVQT
PBANKA_1123500	A0A509AM22	SNF2 helicase, putative OS=Plasmodium berghei (strain Anka) OX=5823 GN=PBANKA_1123500 PE=4 SV=1	292.4	0	0	0	0	0	0	0	0	0	0	0	0	0	0	582918	0	1	ND	ND	ND	ND	16	18	16	8	MRIRKTWCTLCRENFEDGDDCICCKQCKKKFHKECLQAEGLIDVEQLKDIKNYICYQCMNEEDDTPENEDRCKICREKASNLILLLCDGCPNSYHVSCLGLQTEPESEKWYCPVCKPEEHKNLDIRRMRKGFAIDNMNGDHVNSSSCYVCQRPGKLLGCDFCPNSFHPICLPDLDFDNISDQWECPCCKNEDPLLNQGHKRWTKNEIQEIMKKRQKELNFWRSRIIKYRNRFLLAHRKDLQPFVNPKVFANLTKTFKNDFYASKCNNTNKKGGKNDSGKGTKITSINNNSSSNGKKCLNLDSKEFDEYISSLEEEANQNASKFIESVFLSVYHPNGKKIERRPLVDNVQLKPHQEDGVEWLLKSFLTGGAILADEMGLGKTIQTLCFLSYLKCNKIDGP…
PBANKA_1344600	A0A509AP16	Uncharacterized protein OS=Plasmodium berghei (strain Anka) OX=5823 GN=PBANKA_1344600 PE=4 SV=1	36.1	0	0	0	0	0	0	0	0	0	0	0	0	0	0	381836	0	1	ND	ND	ND	ND	2	2	2	8	MGFLINDEKKSEIIKSSEDLEISRTINDIYLSKYNNEEKKDNNVLSSIHNFNNNIDDNVLSKNKFKNNDGHITSYGNNLNSYENDKINNDINKVNSDINKIKNALTDQNYVVETGSEDAGKIENKNNDLLYNGNVEDKLNCIINDNNINMNEHENDSGDINIPNNFIFDKKNENIYYNNTSSTINNSNMETKKDSNRNEYGNLLVNSKLNGIDPNSINGNTVINKKFNKNMKIFRATPYNTNQYVHSIKKKIKKKFTENDYLFCTINKFLRDGLKNECIPLFERLQQNLFFLVTLANASHRSFDEHEDSSSDY
PBANKA_1204900	A0A509ATK3	Zinc finger protein OS=Plasmodium berghei (strain Anka) OX=5823 GN=PBANKA_1204900 PE=4 SV=1	33.9	0	0	0	0	0	0	78881	0	0	30136	51436	0	0	0	1860589	0	1	ND	ND	ND	ND	9	25	9	46	MKVELSNKHNDAFSASSIIGEKLLRGWTLLNASCHICKITPLIKQKNKEENFCAYCNLYIKTDKCENDEQLESNTSLENKEINKTINENHNGEKMEGIMVNPENNNIFASSNIKYIKEIKLQNEEFNEILNKNNISKNEIKNLFEYKNYIKERCGYDVGKWLKIDNNNYDEKKEDEESTNANSYIKEKKIDKNNDMFFLENKNQDFKFSKINNMNISDSQINKYNQIENELLILNKTKYALIKKLEKYSHILDNTNIKTEEFEYTNEIKKTIEILEKINNLKKNIVI
PBANKA_0706800	A0A509AK33	DnaJ protein, putative OS=Plasmodium berghei (strain Anka) OX=5823 GN=PBANKA_0706800 PE=4 SV=1	75.3	0	0	0	0	0	0	0	0	0	0	0	0	0	0	782508	0	1	ND	ND	ND	ND	7	12	7	19	MKRKSGNENIVPQGSSESIENFGGKGNKGKDENNNKKGKGHSITEVYKNKLKFIRDNIILISIILSFLVLISFKYLEEKYSIESYLEEGDSFDYYEILKCKKGDNIQKIKKNYRDLSKKYHPDSNKNCKDCDQKFRDITKAYKTLSDSRLKQAYDNSRGKVLKLIESNSINLNWKNYTDLVENSNKYWIIQVYSDTDSLSLSFSKIWEEAFDKYHEYISFGRINSLTDKKLINNKVPFNVKIYPTIYILAPDGSYQIYSNIYNASIKDFQNFITSYYPSYIYDIKSLNKAYDYRKNFVEIKKKGDNGAITSTYIDKNNMVVLLSNKTKQSLPVKQIAFEFNNIYNTYSIKYDEIKNISNEGLKEEIVNSLKKLSIKKEEYIAENKKIDYFLLVNSNSKV…
PBANKA_1408900	A0A509ATN1	Uncharacterized protein OS=Plasmodium berghei (strain Anka) OX=5823 GN=PBANKA_1408900 PE=4 SV=1	160.4	0	0	0	0	0	0	0	0	0	0	0	0	0	0	194409	0	1	ND	ND	ND	ND	3	3	3	3	MEDKKNIRNSNENKMKSQNEHNSTSKRKRANIIENFDIITHMDEFNSNSSSKKKSTCHEEIKKHDIYNEKSEKGIEQYLNENKTNKDTIIKKNNESNNIMENNKHSRNIIASNYDEHGTNHDTHSLKIISDSTHRDTNRESNKYKKVLYDYVNTHSKQILNNTEEKVKNPENVNNNNITNERKNENDDNNSFRWVNALFLNETNDEENRNMEEASKFYGGIKILKVNTDVNSANNNNSKKINTDIKVAEALDIVKLPESNNLDESLNSPNISSLAQNGNTESNRTGESNISEQQVISERENANIADYIYNGKWEYPLSIYQKIIFKSPDHDYKKWICHCNILCVLNLPLNVSDSYLLKSLIDMYYKHKNRDMTLDLLDMFDFEYINTFLEIYSSVDEAP…
PBANKA_1426700	A0A509ASR9	Hydroxymethyldihydropterin pyrophosphokinase-dihydropteroate synthase, putative OS=Plasmodium berghei (strain Anka) OX=5823 GN=PBANKA_1426700 PE=4 SV=1	79.7	0	0	53373	43573	0	0	0	45138	0	28660	0	0	0	0	398145	0	1	ND	ND	ND	ND	4	8	4	11	MDIIEESNKCKENNKGNIVVLNFGTTDKTNAVTILETALYLTEKYIGKIINTSYMYETVPEYVVLDKSDIPKNIIGEDDPYDVSSLNDLVKGLEKSKYENVFQGEENLVSQCEEYERFLNNKDLFENKIKQISTEKYESETSNIIKENDEIMKINLEKHKNKYYTSYFYNLVVVFKCFIDDPLNLLVILKYIEHLMKRKNSKEVEKFENRLIDIDILFFNNYTIFEKNINLTKNDLYTIMCKYINIEYDNSSSDNCNKLSRNIEEIKDNIKFLSIPHVYTKHRYSILLCLNDIMPNYKHNALKETINKLHEEFITSFSKLYNTCIKKYNKRLYVLKNEVLCLKEKTNIVGILNTNYNSFSDGGLFVKPNIAVHRMFQMIKEGVDIIDIGGESSAPFVSH…
PBANKA_1023000	A0A509AL13	Myosin-specific chaperone UNC, putative OS=Plasmodium berghei (strain Anka) OX=5823 GN=PBANKA_1023000 PE=4 SV=1	136.1	0	0	0	0	0	0	0	0	0	0	0	0	0	0	562458	0	1	ND	ND	ND	ND	9	9	9	8	MEEFNVNNVDEKKIEEIKNEGNDMFKNKKYKEAINIYLKVVSYLSNGSKNEIEIKDIVKYFKKKNTEYENDEKEKDNASVSQWINVKTIFIKICHNLSLCYYFLEQFEKSIEYCLYINDMDMNHSKSYHTLGLCYEKLKDYKKCISYFDKCKTILSTEKSNQKDGVKGEMRNNKAEIDKINDKLKIIIKHIEDSKCVNTTTIDKIKNIVLDNNSTEENKIKMLHSIYNQKFYLLIKENILKFLFDIINNKNNNCSLHMEKTCLYVIYKILSKLESENMSIEKEKVKNSKNSNSCISTLDDIKFKYYYDFDFVKLLFSFNEHFDEKWINNYIKNKTNKLENLKFDKEKEMENKEDSYKLTIDTLVYILNIIKYVHVINNEQILKIINLYYINSDNSTLQN…
PBANKA_0823500	A0A509ANX1	Glutamine synthetase, putative OS=Plasmodium berghei (strain Anka) OX=5823 GN=PBANKA_0823500 PE=3 SV=1	64.2	0	0	29097	156088	0	0	0	97313	0	24531	0	0	0	0	819088	0	1	ND	ND	ND	ND	13	33	13	31	MKFISFSNPIELFEYINKKENDIEVVACIFTNLLGSFFKCFFYVNDISLNKLEKGFPFDASSIKLCSDAEVSDFYLRADYSTCYTEEFHGKQMLNVLCDIKRYNGLDYYKCPRTILKKACELIKNDNIADNIYIGNEIEFFIFDKVNFLSDDYNTYLKIYDRESFSCKNYIPEVYNSNPINAIEGCNNNNNSSTNDEHYSLQSLNSIFINDDTKKIKNKCGYFSTSPYDTSELIKVQICRDLNNLGINVQKYHHEVSTSQHEISLKYFNALKNADNLLIAKQIIKKNVHNFNRTATFMPKPLVNDNGSGLHCNISLWKNNSNIFYSDDPSTFFISKECFYFMNGIIKHTKALQALCNSTINSYKRLMPGFETSQKLFYSFGSRNAVIRLSLINYNSSLE…
PBANKA_1206600	A0A509AQF1	26S protease regulatory subunit 4, putative OS=Plasmodium berghei (strain Anka) OX=5823 GN=PBANKA_1206600 PE=3 SV=1	49.7	0	0	0	79323	0	9594	109979	142945	19095	20860	26553	0	0	0	2100484	0	1	ND	ND	ND	ND	14	73	11	47	MGNAQGGMNNNPYGFLGKKDDKDKGKDKEKKKLESSPPSHIGKRKKKKKGATGHSKLPTVTPNTKCRLKLLKLERIKDYLLLEEEFITNQEQIKTTDDKNYGKLKIDDLRGSPMSVGTLEELIDENHGIIATSVGPEYYVNILSFVDKDLLEPGCSVLLNNKTNSVVGILLDEVDPLVSVMKVEKAPLESYADIGGLESQIQEIKEAVELPLTHPELYEDIGIKPPKGVILYGPPGTGKTLLAKAVANETSATFLRVVGSELIQKYLGDGPKLVREMFKVAEDHAPSIVFIDEIDAVGTKRYEATSGGEREIQRTMLELLNQLDGFDSRGDVKVIMATNRIDSLDPALIRPGRIDRKIQLPNPDTKTKRRIFQIHTSKMTMSPDVDLEEFVMSKDELSG…
PBANKA_0617100	A0A509AHZ8	60S ribosomal protein L11a, putative OS=Plasmodium berghei (strain Anka) OX=5823 GN=PBANKA_0617100 PE=3 SV=1	20.2	0	29474	28991	22504	0	0	78338	0	16771	185553	44237	0	0	0	6465371	0	1	ND	ND	ND	ND	7	30	6	42	MEKKEDNVMREIKVNKLILNICVGESGDRLTRAARVLEQLTEQKPIFGKCRFTIRSFGVRRNEKISCFVTVRGKKALEILEKGLKVKEYELRRKNFSDTGNFGFGIQEHIDLGIKYDPSTGIYGMDFYVHLSRPGYRVTRRRRKRSTISKTHKVTKEDAMKWFQTKFDGILLK
PBANKA_1244000	A0A509ARJ6	Cell cycle regulator protein, putative OS=Plasmodium berghei (strain Anka) OX=5823 GN=PBANKA_1244000 PE=4 SV=1	20.2	0	0	0	0	0	0	0	0	0	0	0	0	0	0	353882	0	1	ND	ND	ND	ND	3	3	3	19	MKGFCVDNISSQNLMKSSVQRSIKATILKQYPKLENFIDDIFPKKGPIFLGKCTNHVTIIIGNNEVLFFQIRNGPWMPNLRLVHTYPFLMPQIQVDKGAIKHVLRGSNVMCPGVTSPGGKLDDVEANTVVQIRAEDKEHACAVGIATMSSKEIIEINKNMCIENIHYLNDGLWNCKLNDK
PBANKA_1221200	A0A509ANR3	60S ribosomal protein L34, putative OS=Plasmodium berghei (strain Anka) OX=5823 GN=PBANKA_1221200 PE=3 SV=1	18.9	0	35585	39803	0	0	0	99547	49580	0	58720	0	0	0	0	1813139	0	1	ND	ND	ND	ND	5	14	5	28	MAQRVHYRKHNHYNTKSNKVRPIRTPGGKLTIHVIKKKAGKPKCADCKNPIQGVKALRPADNQRARKKDRKVSRAYGGSICAKCIKERIMRAFLFEEQKCVRQVLKEKKKQEQKVKKVKKEKKDKKDKGDKKDKKKVIAKDAKKKISSSGKNLKKVVDKKRGGI
PBANKA_0209300	A0A509AE68	Actin-related protein OS=Plasmodium berghei (strain Anka) OX=5823 GN=PBANKA_0209300 PE=3 SV=1	42.4	0	0	0	0	0	0	7990	0	0	0	0	0	0	0	315797	0	1	ND	ND	ND	ND	4	6	4	17	MNEYGNQLYSNQPIIIDNGSGYIKSGFAGDDAPNLVFPSYVGRPKYKRVMAGAVEGNLFVGNKAEEYRGLLKVTYPINHGIIENWNDMENIWIHVYNSLKINSEEHPVLLTEAPLNPQKNKEKIAEVFFESFNAPALFISIQAILSLYSCGKTNGTVLDCGDGVCHCVSIYEGYSITNTITRSDIAGRDITTYLGYLLRKNGHLFNTSAEMEVVKSMKENCCYVSFNMSKEKNTSEKSLTTLPYILPDGSQILIGSERYRAPEVLFNPSILGLEYLGLSELIVTSITRADMDLRKTLYSHIVLSGGTTMFQGFGDRLLNEIRKFSPKDITIRISAPPERKFSTFIGGSILASLATFKKIWINKQEFDEYGSAILHKKTF
PBANKA_1209800	A0A509AN69	Proteasome subunit beta OS=Plasmodium berghei (strain Anka) OX=5823 GN=PBANKA_1209800 PE=3 SV=1	30.6	0	0	27228	37850	0	8620	25238	0	11713	25528	16917	0	0	0	1087483	0	1	ND	ND	ND	ND	5	15	5	26	MMQYSTDFMSQIDNLINDEEENVNTTDELEFCIAPISVPRNFIKYAKTENKKLFDFHKGTTTLAFKFKEGIIVAVDSRASMGSFISSQNVEKIIEINKYILGTMAGGAADCFYWEKYLGQIIKIYELRNNEKISVRAASTILSNILYQYKGYGLCCGIILSGYDHTGFNMFYIDDEGKKVEGNLFSCGSGSTYAYSILDSAYDYNLSVDQAVELGRNAIYHATFRDGGSGGKVRVFYIHKNGYSKIIEGEDVYDLHYHYTNPSQKDQYVM
PBANKA_1205000	A0A509ALT6	Single-strand telomeric DNA-binding protein GBP2, putative OS=Plasmodium berghei (strain Anka) OX=5823 GN=PBANKA_1205000 PE=4 SV=1	27.8	0	0	0	0	0	0	503089	0	35597	96376	98220	0	0	0	8436233	0	1	ND	ND	ND	ND	11	56	11	54	MENNQNSPTKGCRVYVGNLPWKVTWPVLKDHMKKVGDVLRVDIFEDTQGRSKGCGIVEYSSCEEAQEAINRLNDSKLEDRLIFVREDREENSGSFEKKRFSNIRKDKFYDPRRRRDFDYRKDFRRDEYKKDFRRDNRKDEYRKGSDFRRGVRRNCTLVVYNLPPQSTWKELKDLFKKHGRVIRADLKNEETTSKEITGTVIMETDYDAKNAIDALNFCNFDGYILKVNYENNE
PBANKA_1365200	A0A509APW3	Thioredoxin-related protein, putative OS=Plasmodium berghei (strain Anka) OX=5823 GN=PBANKA_1365200 PE=4 SV=1	23.6	0	0	0	0	0	0	7934	0	11367	12871	8823	0	0	0	660623	0	1	ND	ND	ND	ND	3	8	3	21	MVGFAKGFIFFLFLTLFNYCYAQDVIELNDTNFESLTQISTGNTTGSWFIKFYAPWCSHCKAMSRAWTELASEMKGAVNIAKVDVTTNSKTRKRFKIEGFPTLIYFKNGKMYDYKSNDRSLEALKNFILESYKNVKPLEAPAPLSYADILKELVHETFLNIDRIYKYAFPALALICVLSFLIGFIFCLALCKICCKKGRPKSKKKD
PBANKA_1011400	A0A509AJ99	DNA topoisomerase 2 OS=Plasmodium berghei (strain Anka) OX=5823 GN=PBANKA_1011400 PE=3 SV=1	168.5	0	0	0	0	0	0	0	0	0	0	0	0	0	0	609457	0	1	ND	ND	ND	ND	14	18	14	11	MSKNKTIEERYQKKSQIEHILLRPDTYIGSVEMHTQLLWIWNKEKNRMVQKNITYVPGLYKIFDEIIVNAADVKAREKEKSENPMTCIKIEINKEQKRISVYNDGEGIPVDIHKEMNIYVPHMIFGELLTSDNYDDAEDRITGGRNGFGAKLTNIFSKEFTVQCGDSSRKREFKMTWSQNMSKFSEPHIKNYNGKDYVKVTFKPDLDKFGMAELDDDIECLLHKRVYDLAGTCNVRVYLNGTRLPVKDFKSYVDLYLRDNSHPNTNPSVSKNALNGNTDASVNKTIDNLDVSIFHDNGGGAGDITPSKTTEENGNSNFNNNKYEEEIVKIHEKQHRWEIVISKTDGSQFQQVSFVNSICTTKGGTHVSYIVDQLLNSLSKKANAKNKGGMEIKSGHIRN…
PBANKA_0604800	A0A509AGV6	Eukaryotic translation initiation factor 3 subunit C OS=Plasmodium berghei (strain Anka) OX=5823 GN=PBANKA_0604800 PE=3 SV=1	108.8	0	13136	0	0	0	0	57286	38799	0	0	23601	0	0	0	2880859	0	1	ND	ND	ND	ND	26	67	26	32	MQSKFWARGADNDSGDNVSDSSENEVDEKPLVSAQAERWAVMDSSSSEEEERVIKSSEGKRLDFYENIEDNLNESMENDDFNQLLKEYENLYKFMVKEDSDRIPNFVIIYLDKLTKYVDTTFQNNVEKKNLSKNKAQTLNKLRAKIRKCSELYQNKLNQYLENPEKFKDDLGRRKKDEDEEDEEDEEDEEDEEDEEDEEKDKINKEDGDEEDDWSYSEDAEYASDEEDDKTKKAMSKWGLKTIEKVDSKKKVAKIKKSKKEGTKKKDDKGSHIDDNQSSKKKTYAELLNTKNLSEDVIRNRVKSVIEKRGRKGLDKHEHINILSKLCEIAKTISTQSYIEVLEHLINLEFDVVSSVYTYMSFNIWNKTFKYIELILDLLIQNEHFYLVSINITEEIAEV…
PBANKA_1018300	A0A509AKV0	Dynein intermediate chain, putative OS=Plasmodium berghei (strain Anka) OX=5823 GN=PBANKA_1018300 PE=4 SV=1	69.6	0	0	0	0	0	0	0	0	0	0	0	0	0	0	440305	0	1	ND	ND	ND	ND	7	8	7	16	MIDYYYCYTNNKSAIGKKCKFSKSKSQIIGRIEPNNQIKKKYMYKENINYNDENIKKYSEEYINIESVKLENKFFYHSEGGWTKDVDISEHQNKLKYIKRLDKDINLINSLKYLMNETTKIINKNNCINIYEEYFKDDIKNDEHFKIKSLLVIKDKLRKYNRFVTSIKWANDNTHKIAISYCVNNYQKILNNTPKNCLLYNLNEINNPYQILYSKSFIKCLRFNHKNSDLLLAGSYDGTIHLWDLRKKNNLCESSSINCSHKNIVNDITWLQTKTNNQCLSTSSDGLCLIWDIRNLSNHIESFYLNKDTTDTFDLLEKSNIISNNLGGTLSPDNPTKNTQKEHSTSKLDANDDNYYSANYIEWCLEAGPSKILVGTDEGYILSLSKRQSKHLELLQKYG…
PBANKA_1312700	A0A509APL4	Gamete egress and sporozoite traversal protein OS=Plasmodium berghei (strain Anka) OX=5823 GN=PBANKA_1312700 PE=4 SV=1	28.8	0	0	0	0	0	0	0	0	27881	13741	0	0	0	0	362508	0	1	ND	ND	ND	ND	4	7	4	18	MKVFLCYASILFASILHSRAMILNSLGNKPSSYLEIGDTVSNQISEAWKNHVDSFIDVVSEKIVDKFEKDIENDNVPHNLLALLENDAEIFDINTYEGKDIAFIQDAFIRKLRERFNNSKFGQHTKKLGSKIKQKLTSLYKKHKDKIKHFLKIMLSSLVIPIAFNYIKKHLNAWKNKTLEATNKLDEDAKSVATPIITAIYDKFGEKLDKYVKDNHIDIGKELNVLTDLQKEKKEIDQIEKEEKKIIQQ
PBANKA_1023800	A0A509ARA0	Uncharacterized protein OS=Plasmodium berghei (strain Anka) OX=5823 GN=PBANKA_1023800 PE=4 SV=1	227	0	0	0	0	0	0	0	0	0	0	0	0	0	0	320073	0	1	ND	ND	ND	ND	8	8	8	6	MKNYNSYNSRNKNKHEDINYNNSYNYPNNYYYGNNNSNYKKKINNRYWKGAYGNDYLKNENRSNNKNSDLNQYKKHDNNNNNTKNPNNNNTKNPNNNNPKNNDNKYDSLSSIDKIKDNSIYEDVDKINNITFGYNDNSEGDFSYIMNNNFIENEKKLFKLNNNIDSSKNMNSSEFLMQKECDLINNNNLNSIKRKNGMDLYLRQAHGNNICEKENHAIKEDKLRNNSQNYNNDNNRDIERNKNFNMASSCNEKENIFQFHNVSNLTKFINKNIFYSNDNEELSDEHSFDNADPFNFMQKDDMNNKKNISEANSHFNNFSNKIFGDNKFLEKNYNKKNISQNKEQNMVFAHKHFESEYDEKINRFSENKYDDYDNDENYKNLDYFNILKKKNMNTIVNDN…
PBANKA_1337100	A0A509AX97	Splicing factor 1, putative OS=Plasmodium berghei (strain Anka) OX=5823 GN=PBANKA_1337100 PE=4 SV=1	82.5	0	0	0	0	0	0	0	0	0	0	0	0	0	0	776338	0	1	ND	ND	ND	ND	8	9	8	15	MEEDNEHFDEKETTLDKKKNKKNINGTVKSQINDNSESDENNCNSNTDEESLLKNDKKRKQSAKEKGNKSNVTRRGRRKREETEEDTDTDKNEETDIIEKDENSNSSENGIAQKSKSKTGLEKNDSKHTSERSELGDEKEEQSDNDENEKRKKERYKNIKHYNDERNSNSNRDKSSDSESDQDERSRKREDKSESYKEDYHKKRRRKPHSSNDTNSSDDDEKRSHKSRSVKKRRHERRERRRHRGRSRGRSRDRSRDRSRDRSRDRSRDKSRDRSRDRSRDRNRYRDRDRERRRERERERMRREREIEREKRREERRKKEELEEAKRDDLTVLVLNLDLKADERDIYEFFSEVAGKVRDIQCIKDQRSGKSKGVAYVEFYTQESVIKALSVNGYMLKNR…
PBANKA_1245900	A0A509ARL5	Asparagine-rich protein OS=Plasmodium berghei (strain Anka) OX=5823 GN=PBANKA_1245900 PE=4 SV=1	47.3	0	0	0	0	0	0	0	0	0	0	0	0	0	0	346253	0	1	ND	ND	ND	ND	2	2	2	10	MNFVFLIKPFIFSLIICYEYYQNDVNKSEHVFKKHNAAITLPSRINRLLAEYGAGPTTNSLSLRRRKKKEFDTESQKKNLEKYINENDIVNLENYIKENTNINNNNMIDNDNANMIDNDNNNMIDNDNNNMIDNDNANMIDNDNANMIDNDNANMIDNDNNNMIDNDNNNMIDNDNNNMIDNDNNNMIDNDNNNMIDNDNNNMIDNDNNNMIDNDNANMIDNDNANMIDNDNANMIDNDNNNMIDNDNNNMIDNDNNNMIDNDNANMIDNDNNNMIDNDNSNMIDNDNNMIGEGNNADDNDDYDIESEEEGYSSNYQTYNKRDILTNDYIPKHGSFLGFNKKKMKKYLTDTHIPSGFIGVSTFAIGLPVSQVLNANKFAPAIASNYVLTLTTLSYLVRL…
PBANKA_1109000	A0A509ALV5	DNA-directed RNA polymerase subunit OS=Plasmodium berghei (strain Anka) OX=5823 GN=PBANKA_1109000 PE=3 SV=1	300	0	0	0	0	0	0	0	0	0	0	0	0	0	0	270043	0	1	ND	ND	ND	ND	8	8	8	3	MYDINSAKCAEIKSAELGVLSSQELKRISLGKYENQLQEFEKISKDGTSNRITYDPRFGTIDYSQICSVCFEKHDGCLGHIGHIEFVLPVFNPLFYKDLQELLNLVCYNCYGLCYSEDVIFLLKHIYQLKSLNEIESSNKFIIKKNNENEYVVSEIERLYNKICKESNITIEDIVESICQDYENSFGNSGNGNNENGSHEDNQTYELWKKINDDMYSDDQKNQGDFSKKFAKKKNSNYDLKNQKSNQEIENKETKEKIKFLKEKIKKYKFDISKLAFQSNYNYEEYIILNKAIKLHMKKGANCSNCKFRRSITVKTSQKKDTINFIGTYTNSSFFKKYISKNNKNGSFEEYGDNDEDDDNLDDNKINYDNAEVGKGNKRGKEIKSEKRKNLNNLENGVN…
[truncated: 435 more rows]
